# Supplementary material for: Expression and Interaction Proteomics of GluA1- and GluA3-Subunit-Containing AMPARs Reveal Distinct Protein Composition
Source: Cells. 2022 Nov 17;11(22):3648. doi: 10.3390/cells11223648 (PMC9688267; doi:10.3390/cells11223648)
Supplement: Supplementary file 1 [file cells-11-03648-s001.zip]

Archive with 5 entries (5 files):
- cells-1961714-supplementary.pdf
- Table S1.xlsx
- Table S2.xlsx
- Table S3.xlsx
- Table S4.xlsx
