# Supplementary material for: Expression and Interaction Proteomics of GluA1- and GluA3-Subunit-Containing AMPARs Reveal Distinct Protein Composition
Source: Cells. 2022 Nov 17;11(22):3648. doi: 10.3390/cells11223648 (PMC9688267; doi:10.3390/cells11223648)
Supplement: Supplementary file 1 [file cells-11-03648-s001.zip › Table S1.xlsx]

## Sheet: Table S1
Table S1. Summary of the mean, s.e.m., n numbers and eBayes non-FDR adjusted p-values of relative protein abundances measured with mass spectrometry, as shown in Figure 1b
Protein	Group	Mean ± s.e.m.	n	p-value
AP-2 mu	WT	1.00 ± 0.02	6	0.75
	Gria1 KO	1.00 ± 0.03	6
PSD-95	WT	1.00 ± 0.06	6	0.02
	Gria1 KO	1.09 ± 0.03	6
GluA1	WT	1.00 ± 0.09	6	1.45*10-16
	Gria1 KO	0.03 ± 0.003	6
GluA2	WT	1.00 ± 0.09	6	9.80*10-7
	Gria1 KO	0.61 ± 0.02	6
GluA3	WT	1.00 ± 0.04	6	0.3
	Gria1 KO	1.04 ± 0.05	6
MPP2	WT	1.00 ± 0.07	6	0.24
	Gria1 KO	1.07 ± 0.05	6
SynDIG4	WT	1.00 ± 0.08	6	1.08*10-7
	Gria1 KO	0.41 ± 0.09	6
SynDIG1	WT	1.00 ± 0.09	6	0.26
	Gria1 KO	1.07 ± 0.09	6
Rap-2b	WT	1.00 ± 0.08	6	0.46
	Gria1 KO	1.04 ± 0.10	6
Shisa6	WT	1.00 ± 0.08	6	0.01
	Gria1 KO	1.15 ± 0.13	6
Shisa7	WT	1.00 ± 0.09	6	7.68*10-3
	Gria1 KO	1.16 ± 0.11	6
TARP-γ8	WT	1.00 ± 0.04	6	1.00*10-5
	Gria1 KO	0.75 ± 0.05	6
AP-2 mu	WT	1.00 ± 0.04	6	0.05
	Gria3 KO	1.09 ± 0.05	5
PSD-95	WT	1.00 ± 0.02	6	0.61
	Gria3 KO	1.02 ± 0.09	5
GluA1	WT	1.00 ± 0.05	6	0.14
	Gria3 KO	1.05 ± 0.11	5
GluA2	WT	1.00 ± 0.04	6	0.42
	Gria3 KO	0.97 ± 0.09	5
GluA3	WT	1.00 ± 0.04	6	N.A.
	Gria3 KO	-	5
MPP2	WT	1.00 ± 0.05	6	0.02
	Gria3 KO	1.06 ± 0.07	5
SynDIG4	WT	1.00 ± 0.05	6	0.18
	Gria3 KO	1.10 ± 0.12	5
SynDIG1	WT	1.00 ± 0.06	6	4.74*10-4
	Gria3 KO	1.24 ± 0.12	5
Rap-2b	WT	1.00 ± 0.07	6	0.04
	Gria3 KO	1.16 ± 0.12	5
Shisa6	WT	1.00 ± 0.06	6	0.66
	Gria3 KO	1.01 ± 0.07	5
Shisa7	WT	1.00 ± 0.07	6	0.81
	Gria3 KO	0.85 ± 0.16	5
TARP-γ8	WT	1.00 ± 0.06	6	0.67
	Gria3 KO	1.05 ± 0.09	5
