# Supplementary material for: Expression and Interaction Proteomics of GluA1- and GluA3-Subunit-Containing AMPARs Reveal Distinct Protein Composition
Source: Cells. 2022 Nov 17;11(22):3648. doi: 10.3390/cells11223648 (PMC9688267; doi:10.3390/cells11223648)
Supplement: Supplementary file 1 [file cells-11-03648-s001.zip › Table S2.xlsx]

## Sheet: Table S2
Table S2. Summary of the mean, s.e.m., n numbers and statistics of relative protein abundances measured with immunoblot, as shown in Figure 1d.
Protein	Group	Mean ± s.e.m.	n	Statistics	p-value
		(Median, Q1-Q3)
CNIH-2	WT	1.00 ± 0.04	6	Unpaired t test t=9.16, df=10	< 0.0001
	Gria1 KO	0.51 ± 0.03	6
GluA1	WT	1.00 ± 0.05	6	Welch-corrected t=21.17, df=5.01	< 0.0001
	Gria1 KO	0.01 ± 0.002	6
GluA3	WT	1.00 ± 0.02	6	Unpaired t test t=1.68, df=10	0.12
	Gria1 KO	1.08 ± 0.04	6
SynDIG4	WT	1.00 ± 0.08	6	Mann-Whitney U= 0	2.2*10-3
		1.00, 0.82-1.12
	Gria1 KO	0.40 ± 0.02	6
		0.41, 0.36-0.43
Shisa6	WT	1.00 ± 0.19	6	Unpaired t test: t=0.93 df=10	0.37
	Gria1 KO	1.22 ± 0.13	6
TARP-γ8	WT	1.00 ± 0.14	6	Welch-corrected t=4.25, df=5.55	6.4*10-3
	Gria1 KO	0.38 ± 0.03	6
CNIH-2	WT	1.00 ± 0.09	6	Unpaired t test t=0.33, df=10	0.75
	Gria3 KO	1.05 ± 0.14	6
GluA1	WT	1.00 ± 0.10	6	Unpaired t test t=0.52, df=10	0.62
	Gria3 KO	1.08 ± 0.11	6
GluA3	WT	1.00 ± 0.13	6	Mann-Whitney U= 0	2.2*10-3
		0.90, 0.75-1.27
	Gria3 KO	0.025 ± 0.01	6
		0.025, 0.01-0.045
SynDIG4	WT	1.00 ± 0.08	6	Unpaired t test t=0.18, df=10	0.86
	Gria3 KO	1.03 ± 0.06	6
Shisa6	WT	1.00 ± 0.12	6	Unpaired t test t=0.28 df=10	0.79
	Gria3 KO	0.96 ± 0.08	6
TARP-γ8	WT	1.00 ± 0.12	6	Unpaired t test t=0.12, df=10	0.91
