# Supplementary material for: Expression and Interaction Proteomics of GluA1- and GluA3-Subunit-Containing AMPARs Reveal Distinct Protein Composition
Source: Cells. 2022 Nov 17;11(22):3648. doi: 10.3390/cells11223648 (PMC9688267; doi:10.3390/cells11223648)
Supplement: Supplementary file 1 [file cells-11-03648-s001.zip › Table S3.xlsx]

## Sheet: MaxQ output
Protein IDs	Majority protein IDs	Peptide counts (all)	Peptide counts (razor+unique)	Peptide counts (unique)	Protein names	Gene names	Fasta headers	Number of proteins	Peptides	Razor + unique peptides	Unique peptides	Peptides A1KO_anti-GluA1_1	Peptides A1KO_anti-GluA1_2	Peptides A1KO_anti-GluA1_3	Peptides A1KO_anti-GluA2/3_1	Peptides A1KO_anti-GluA2/3_2	Peptides A1KO_anti-GluA2/3_3	Peptides A3KO_anti-GluA3_1	Peptides A3KO_anti-GluA3_2	Peptides A3KO_anti-GluA3_3	Peptides A3KO_anti-GluA2/3_1	Peptides A3KO_anti-GluA2/3_2	Peptides A3KO_anti-GluA2/3_3	Peptides A3KO_anti-GluA2/3_4	Peptides WT_anti-GluA3_1	Peptides WT_anti-GluA3_2	Peptides WT_anti-GluA3_3	Peptides WT_anti-GluA1_1	Peptides WT_anti-GluA1_2	Peptides WT_anti-GluA1_3	Peptides WT_anti-GluA1_4	Peptides WT_anti-GluA2/3_1	Peptides WT_anti-GluA2/3_2	Peptides WT_anti-GluA2/3_3	Peptides WT_anti-GluA2/3_4	Razor + unique peptides A1KO_anti-GluA1_1	Razor + unique peptides A1KO_anti-GluA1_2	Razor + unique peptides A1KO_anti-GluA1_3	Razor + unique peptides A1KO_anti-GluA2/3_1	Razor + unique peptides A1KO_anti-GluA2/3_2	Razor + unique peptides A1KO_anti-GluA2/3_3	Razor + unique peptides A3KO_anti-GluA3_1	Razor + unique peptides A3KO_anti-GluA3_2	Razor + unique peptides A3KO_anti-GluA3_3	Razor + unique peptides A3KO_anti-GluA2/3_1	Razor + unique peptides A3KO_anti-GluA2/3_2	Razor + unique peptides A3KO_anti-GluA2/3_3	Razor + unique peptides A3KO_anti-GluA2/3_4	Razor + unique peptides WT_anti-GluA3_1
Q8CHH9;B1AQZ0;B7ZC46;B1AQY9	Q8CHH9;B1AQZ0;B7ZC46;B1AQY9	1;1;1;1	1;1;1;1	1;1;1;1	Septin-8	2008-09-01	sp|Q8CHH9|SEPT8_MOUSE Septin-8 OS=Mus musculus OX=10090 GN=Septin8 PE=1 SV=4;tr|B1AQZ0|B1AQZ0_MOUSE Septin-8 OS=Mus musculus OX=10090 GN=Septin8 PE=1 SV=1;tr|B7ZC46|B7ZC46_MOUSE Septin OS=Mus musculus OX=10090 GN=Septin8 PE=1 SV=1;tr|B1AQY9|B1AQY9_MOUSE Se	4	1	1	1	0	0	0	0	0	0	0	0	0	0	0	0	0	1	1	0	0	0	0	0	0	0	0	0	0	0	0	0	0	0	0	0	0	0	0	0	0	1
Q0VBF8;A0A1B0GS08;J3QP43	Q0VBF8;A0A1B0GS08;J3QP43	1;1;1	1;1;1	1;1;1	Protein stum homolog	6330403A02Rik	sp|Q0VBF8|STUM_MOUSE Protein stum homolog OS=Mus musculus OX=10090 GN=Stum PE=1 SV=1;tr|A0A1B0GS08|A0A1B0GS08_MOUSE Protein stum homolog OS=Mus musculus OX=10090 GN=Stum PE=1 SV=1;tr|J3QP43|J3QP43_MOUSE Protein stum homolog OS=Mus musculus OX=10090 GN=Stum	3	1	1	1	0	0	0	0	0	0	0	0	0	0	0	0	0	0	1	0	0	0	0	0	0	0	0	0	0	0	0	0	0	0	0	0	0	0	0	0	0	0
E9QAF2;E9PWJ7	E9QAF2;E9PWJ7	2;2	2;2	2;2		Abca16	tr|E9QAF2|E9QAF2_MOUSE ATP-binding cassette, sub-family A (ABC1), member 16 OS=Mus musculus OX=10090 GN=Abca16 PE=4 SV=1;tr|E9PWJ7|E9PWJ7_MOUSE ATP-binding cassette, sub-family A (ABC1), member 16 OS=Mus musculus OX=10090 GN=Abca16 PE=4 SV=1	2	2	2	2	0	0	0	0	0	1	0	0	0	0	0	0	0	0	0	0	0	1	0	0	0	0	0	0	0	0	0	0	0	1	0	0	0	0	0	0	0	0
Q8QZT1	Q8QZT1	3	3	3	Acetyl-CoA acetyltransferase, mitochondrial	Acat1	sp|Q8QZT1|THIL_MOUSE Acetyl-CoA acetyltransferase, mitochondrial OS=Mus musculus OX=10090 GN=Acat1 PE=1 SV=1	1	3	3	3	0	0	0	0	0	0	2	2	0	0	0	0	0	2	3	0	0	0	0	0	0	0	0	0	0	0	0	0	0	0	2	2	0	0	0	0	0	2
Q99KI0;A0A2R8VJW0	Q99KI0	5;1	5;1	5;1	Aconitate hydratase, mitochondrial	Aco2	sp|Q99KI0|ACON_MOUSE Aconitate hydratase, mitochondrial OS=Mus musculus OX=10090 GN=Aco2 PE=1 SV=1	2	5	5	5	0	0	0	0	0	0	0	3	0	3	0	0	0	0	4	0	0	0	0	0	0	0	0	0	0	0	0	0	0	0	0	3	0	3	0	0	0	0
Q9CQR4	Q9CQR4	4	4	4	Acyl-coenzyme A thioesterase 13;Acyl-coenzyme A thioesterase 13, N-terminally processed	Acot13	sp|Q9CQR4|ACO13_MOUSE Acyl-coenzyme A thioesterase 13 OS=Mus musculus OX=10090 GN=Acot13 PE=1 SV=1	1	4	4	4	3	3	2	1	3	1	2	2	3	3	2	1	1	2	2	3	4	3	2	3	3	2	1	1	3	3	2	1	3	1	2	2	3	3	2	1	1	2
Q91V12;E9PYH2	Q91V12;E9PYH2	8;8	8;8	8;8	Cytosolic acyl coenzyme A thioester hydrolase	Acot7	sp|Q91V12|BACH_MOUSE Cytosolic acyl coenzyme A thioester hydrolase OS=Mus musculus OX=10090 GN=Acot7 PE=1 SV=2;tr|E9PYH2|E9PYH2_MOUSE Cytosolic acyl coenzyme A thioester hydrolase OS=Mus musculus OX=10090 GN=Acot7 PE=1 SV=1	2	8	8	8	5	6	4	5	5	5	4	6	1	4	3	3	4	5	6	2	8	3	4	5	4	3	5	4	5	6	4	5	5	5	4	6	1	4	3	3	4	5
P68134;P68033;P62737;P63268;A0A1D5RM20;D3Z2K3;A0A494B9T3;D3YZY0	P68134;P68033;P62737;P63268	5;5;4;4;2;2;2;2	1;1;1;1;1;1;1;1	1;1;1;1;1;1;1;1	Actin, alpha skeletal muscle;Actin, alpha cardiac muscle 1;Actin, aortic smooth muscle;Actin, gamma-enteric smooth muscle	Acta1;Actc1;Acta2;Actg2	sp|P68134|ACTS_MOUSE Actin, alpha skeletal muscle OS=Mus musculus OX=10090 GN=Acta1 PE=1 SV=1;sp|P68033|ACTC_MOUSE Actin, alpha cardiac muscle 1 OS=Mus musculus OX=10090 GN=Actc1 PE=1 SV=1;sp|P62737|ACTA_MOUSE Actin, aortic smooth muscle OS=Mus musculus OX	8	5	1	1	1	1	1	3	1	3	4	4	4	3	4	2	3	4	4	4	2	3	4	3	4	1	3	2	0	0	0	1	0	1	1	1	1	1	1	1	1	1
P60710;P63260;E9Q1F2;E9Q5F4;G3UZ07;F8WGM8;B1ATY1;G3UYG0;E9Q606;A0A0U1RQ96	P60710;P63260;E9Q1F2;E9Q5F4;G3UZ07	9;9;7;6;5;3;3;2;2;2	9;9;7;6;5;3;3;2;2;2	4;4;3;2;2;2;2;1;1;0	Actin, cytoplasmic 1;Actin, cytoplasmic 1, N-terminally processed;Actin, cytoplasmic 2;Actin, cytoplasmic 2, N-terminally processed	Actb;Actg1	sp|P60710|ACTB_MOUSE Actin, cytoplasmic 1 OS=Mus musculus OX=10090 GN=Actb PE=1 SV=1;sp|P63260|ACTG_MOUSE Actin, cytoplasmic 2 OS=Mus musculus OX=10090 GN=Actg1 PE=1 SV=1;tr|E9Q1F2|E9Q1F2_MOUSE Actin, cytoplasmic 1 OS=Mus musculus OX=10090 GN=Actb PE=1 SV=	10	9	9	4	2	1	2	4	2	4	6	6	7	4	5	3	4	5	6	8	3	4	5	4	5	3	4	3	2	1	2	4	2	4	6	6	7	4	5	3	4	5
Q8BFZ3	Q8BFZ3	4	1	1	Beta-actin-like protein 2	Actbl2	sp|Q8BFZ3|ACTBL_MOUSE Beta-actin-like protein 2 OS=Mus musculus OX=10090 GN=Actbl2 PE=1 SV=1	1	4	1	1	1	2	1	2	3	3	3	3	3	2	3	2	3	4	3	3	2	3	3	3	3	2	3	2	0	1	0	0	1	0	0	0	0	0	0	0	0	1
P61161	P61161	1	1	1	Actin-related protein 2	Actr2	sp|P61161|ARP2_MOUSE Actin-related protein 2 OS=Mus musculus OX=10090 GN=Actr2 PE=1 SV=1	1	1	1	1	0	0	0	0	0	0	1	1	0	0	0	0	0	1	1	0	0	0	0	0	0	0	0	0	0	0	0	0	0	0	1	1	0	0	0	0	0	1
Q9R1V6;D3YUP9;D3YUQ0	Q9R1V6;D3YUP9;D3YUQ0	2;2;1	2;2;1	2;2;1	Disintegrin and metalloproteinase domain-containing protein 22	Adam22	sp|Q9R1V6|ADA22_MOUSE Disintegrin and metalloproteinase domain-containing protein 22 OS=Mus musculus OX=10090 GN=Adam22 PE=1 SV=2;tr|D3YUP9|D3YUP9_MOUSE Disintegrin and metalloproteinase domain-containing protein 22 OS=Mus musculus OX=10090 GN=Adam22 PE=1	3	2	2	2	0	0	0	0	0	0	2	0	0	0	0	0	0	0	1	0	0	0	0	0	0	0	0	0	0	0	0	0	0	0	2	0	0	0	0	0	0	0
Q9QYC0;E9Q1K3;F8WHZ9;F8WGR0;Q9QYB8;F6V4G5	Q9QYC0;E9Q1K3;F8WHZ9;F8WGR0;Q9QYB8;F6V4G5	2;2;2;2;1;1	2;2;2;2;1;1	2;2;2;2;1;1	Alpha-adducin;Beta-adducin	Add1;Add2	sp|Q9QYC0|ADDA_MOUSE Alpha-adducin OS=Mus musculus OX=10090 GN=Add1 PE=1 SV=2;tr|E9Q1K3|E9Q1K3_MOUSE Alpha-adducin OS=Mus musculus OX=10090 GN=Add1 PE=1 SV=1;tr|F8WHZ9|F8WHZ9_MOUSE Alpha-adducin OS=Mus musculus OX=10090 GN=Add1 PE=1 SV=1;tr|F8WGR0|F8WGR0_M	6	2	2	2	0	0	0	0	0	0	0	0	1	0	0	0	0	1	0	0	0	0	0	0	0	0	0	0	0	0	0	0	0	0	0	0	1	0	0	0	0	1
P05064;A6ZI44;D3Z510;A0A0U1RPN8;D3YWI1;Q9CPQ9;D3YV98;A0A0U1RPT5;A6ZI46;A6ZI47	P05064;A6ZI44;D3Z510;A0A0U1RPN8;D3YWI1;Q9CPQ9;D3YV98;A0A0U1RPT5;A6ZI46	4;4;3;3;3;2;2;2;2;1	4;4;3;3;3;2;2;2;2;1	4;4;3;3;3;2;2;2;2;1	Fructose-bisphosphate aldolase A;Fructose-bisphosphate aldolase	Aldoa;Aldoart1	sp|P05064|ALDOA_MOUSE Fructose-bisphosphate aldolase A OS=Mus musculus OX=10090 GN=Aldoa PE=1 SV=2;tr|A6ZI44|A6ZI44_MOUSE Fructose-bisphosphate aldolase OS=Mus musculus OX=10090 GN=Aldoa PE=1 SV=1;tr|D3Z510|D3Z510_MOUSE Fructose-bisphosphate aldolase (Frag	10	4	4	4	1	0	1	0	0	0	1	3	0	2	0	0	0	2	4	0	1	0	0	0	0	0	0	0	1	0	1	0	0	0	1	3	0	2	0	0	0	2
D6RFB6;Q9D8F1	D6RFB6;Q9D8F1	1;1	1;1	1;1	Alpha-ketoglutarate-dependent dioxygenase alkB homolog 4	Alkbh4	tr|D6RFB6|D6RFB6_MOUSE Alpha-ketoglutarate-dependent dioxygenase alkB homolog 4 OS=Mus musculus OX=10090 GN=Alkbh4 PE=4 SV=1;sp|Q9D8F1|ALKB4_MOUSE Alpha-ketoglutarate-dependent dioxygenase alkB homolog 4 OS=Mus musculus OX=10090 GN=Alkbh4 PE=1 SV=1	2	1	1	1	0	0	0	0	0	0	1	1	0	0	0	0	0	1	1	0	0	0	0	0	0	0	0	0	0	0	0	0	0	0	1	1	0	0	0	0	0	1
Q7TQF7;A0A668KM31;A0A0G2JEG8	Q7TQF7;A0A668KM31;A0A0G2JEG8	3;3;3	3;3;3	3;3;3	Amphiphysin	Amph	sp|Q7TQF7|AMPH_MOUSE Amphiphysin OS=Mus musculus OX=10090 GN=Amph PE=1 SV=1;tr|A0A668KM31|A0A668KM31_MOUSE Amphiphysin OS=Mus musculus OX=10090 GN=Amph PE=1 SV=1;tr|A0A0G2JEG8|A0A0G2JEG8_MOUSE Amphiphysin OS=Mus musculus OX=10090 GN=Amph PE=1 SV=1	3	3	3	3	0	1	0	0	0	0	3	3	2	0	0	0	0	1	2	2	0	0	0	0	0	0	0	0	0	1	0	0	0	0	3	3	2	0	0	0	0	1
P17426;A0A140LIG7	P17426	19;8	15;8	15;8	AP-2 complex subunit alpha-1	Ap2a1	sp|P17426|AP2A1_MOUSE AP-2 complex subunit alpha-1 OS=Mus musculus OX=10090 GN=Ap2a1 PE=1 SV=1	2	19	15	15	0	0	0	0	0	0	13	11	14	0	0	0	0	11	11	9	0	0	0	0	0	0	0	0	0	0	0	0	0	0	10	9	11	0	0	0	0	9
P17427;A0A140LHG0	P17427	23;1	23;1	19;0	AP-2 complex subunit alpha-2	Ap2a2	sp|P17427|AP2A2_MOUSE AP-2 complex subunit alpha-2 OS=Mus musculus OX=10090 GN=Ap2a2 PE=1 SV=2	2	23	23	19	0	0	0	0	0	0	15	13	18	0	0	0	1	10	13	9	0	0	0	0	0	0	0	0	0	0	0	0	0	0	15	13	18	0	0	0	1	10
Q9DBG3;H3BKM0;H3BIY9;O35643;Q5SVG5;Q5SVG4;H3BJ06;Q5SWR0	Q9DBG3;H3BKM0;H3BIY9	23;23;23;11;11;11;3;1	23;23;23;11;11;11;3;1	23;23;23;11;11;11;3;1	AP-2 complex subunit beta;AP complex subunit beta	Ap2b1	sp|Q9DBG3|AP2B1_MOUSE AP-2 complex subunit beta OS=Mus musculus OX=10090 GN=Ap2b1 PE=1 SV=1;tr|H3BKM0|H3BKM0_MOUSE AP complex subunit beta OS=Mus musculus OX=10090 GN=Ap2b1 PE=1 SV=1;tr|H3BIY9|H3BIY9_MOUSE AP complex subunit beta OS=Mus musculus OX=10090 G	8	23	23	23	0	0	0	0	1	0	14	12	15	1	0	0	0	10	8	13	0	0	0	0	0	0	0	0	0	0	0	0	1	0	14	12	15	1	0	0	0	10
P84091;Q3TWV4;A0A338P798;A0A338P6T4	P84091;Q3TWV4	7;7;1;1	7;7;1;1	7;7;1;1	AP-2 complex subunit mu	Ap2m1	sp|P84091|AP2M1_MOUSE AP-2 complex subunit mu OS=Mus musculus OX=10090 GN=Ap2m1 PE=1 SV=1;tr|Q3TWV4|Q3TWV4_MOUSE AP-2 complex subunit mu OS=Mus musculus OX=10090 GN=Ap2m1 PE=1 SV=1	4	7	7	7	0	0	0	0	0	0	3	3	5	0	0	0	0	3	3	4	0	0	0	0	0	0	0	0	0	0	0	0	0	0	3	3	5	0	0	0	0	3
P62743;A0A0U1RPS0;A0A0U1RQ06	P62743	5;2;2	5;2;2	5;2;2	AP-2 complex subunit sigma	Ap2s1	sp|P62743|AP2S1_MOUSE AP-2 complex subunit sigma OS=Mus musculus OX=10090 GN=Ap2s1 PE=1 SV=1	3	5	5	5	0	0	0	0	0	0	2	2	4	0	0	0	0	2	2	4	0	0	0	0	0	0	0	0	0	0	0	0	0	0	2	2	4	0	0	0	0	2
E9Q414;F7A3M3;E9Q1Y3	E9Q414;F7A3M3;E9Q1Y3	1;1;1	1;1;1	1;1;1	Apolipoprotein B-100;Apolipoprotein B-48	Apob	sp|E9Q414|APOB_MOUSE Apolipoprotein B-100 OS=Mus musculus OX=10090 GN=Apob PE=1 SV=1;tr|F7A3M3|F7A3M3_MOUSE Apolipoprotein B-100 (Fragment) OS=Mus musculus OX=10090 GN=Apob PE=1 SV=1;tr|E9Q1Y3|E9Q1Y3_MOUSE Apolipoprotein B-100 (Fragment) OS=Mus musculus OX	3	1	1	1	0	0	0	1	0	0	0	0	0	0	0	0	0	0	0	0	0	0	0	0	0	1	1	1	0	0	0	1	0	0	0	0	0	0	0	0	0	0
P61205;P84078;Q8BSL7;P84084;P61750;D3YV25;E9Q2C2	P61205;P84078;Q8BSL7	3;3;2;1;1;1;1	3;3;2;1;1;1;1	3;3;2;1;1;1;1	ADP-ribosylation factor 3;ADP-ribosylation factor 1;ADP-ribosylation factor 2	Arf3;Arf1;Arf2	sp|P61205|ARF3_MOUSE ADP-ribosylation factor 3 OS=Mus musculus OX=10090 GN=Arf3 PE=2 SV=2;sp|P84078|ARF1_MOUSE ADP-ribosylation factor 1 OS=Mus musculus OX=10090 GN=Arf1 PE=1 SV=2;sp|Q8BSL7|ARF2_MOUSE ADP-ribosylation factor 2 OS=Mus musculus OX=10090 GN=A	7	3	3	3	0	0	0	0	0	0	2	2	0	1	0	0	0	2	2	0	0	0	0	0	0	0	0	0	0	0	0	0	0	0	2	2	0	1	0	0	0	2
O08691	O08691	6	6	6	Arginase-2, mitochondrial	Arg2	sp|O08691|ARGI2_MOUSE Arginase-2, mitochondrial OS=Mus musculus OX=10090 GN=Arg2 PE=1 SV=1	1	6	6	6	0	0	0	3	5	2	0	0	0	0	0	2	1	0	0	0	0	0	0	0	0	4	3	2	0	0	0	3	5	2	0	0	0	0	0	2	1	0
Q8VDN2	Q8VDN2	15	5	5	Sodium/potassium-transporting ATPase subunit alpha-1	Atp1a1	sp|Q8VDN2|AT1A1_MOUSE Sodium/potassium-transporting ATPase subunit alpha-1 OS=Mus musculus OX=10090 GN=Atp1a1 PE=1 SV=1	1	15	5	5	4	6	3	9	4	4	6	9	9	9	7	7	8	4	11	6	8	8	9	8	9	8	7	9	0	0	0	0	0	0	1	3	1	1	0	0	0	0
Q6PIE5;D3YYN7	Q6PIE5;D3YYN7	12;12	1;1	1;1	Sodium/potassium-transporting ATPase subunit alpha-2	Atp1a2	sp|Q6PIE5|AT1A2_MOUSE Sodium/potassium-transporting ATPase subunit alpha-2 OS=Mus musculus OX=10090 GN=Atp1a2 PE=1 SV=1;tr|D3YYN7|D3YYN7_MOUSE Sodium/potassium-transporting ATPase subunit alpha OS=Mus musculus OX=10090 GN=Atp1a2 PE=1 SV=1	2	12	1	1	5	7	4	10	5	5	6	7	9	9	8	8	9	5	8	7	9	9	10	9	10	9	8	10	0	0	0	0	0	0	0	0	0	0	0	0	0	0
Q6PIC6;A0A0G2JGX4;Q8VCE0;Q9WV27;Q64436;Q91WH7;E9QNX7;Q9Z1W8	Q6PIC6;A0A0G2JGX4;Q8VCE0	24;24;24;4;3;3;3;2	24;24;24;4;3;3;3;2	13;13;13;0;0;0;0;0	Sodium/potassium-transporting ATPase subunit alpha-3	Atp1a3	sp|Q6PIC6|AT1A3_MOUSE Sodium/potassium-transporting ATPase subunit alpha-3 OS=Mus musculus OX=10090 GN=Atp1a3 PE=1 SV=1;tr|A0A0G2JGX4|A0A0G2JGX4_MOUSE Sodium/potassium-transporting ATPase subunit alpha OS=Mus musculus OX=10090 GN=Atp1a3 PE=1 SV=1;tr|Q8VCE0	8	24	24	13	8	9	7	17	7	8	11	13	13	18	14	15	15	11	13	12	17	17	18	18	17	18	15	18	8	9	7	17	7	8	11	13	13	18	14	15	15	11
P14094;A0A0A6YX05	P14094	5;2	5;2	5;2	Sodium/potassium-transporting ATPase subunit beta-1	Atp1b1	sp|P14094|AT1B1_MOUSE Sodium/potassium-transporting ATPase subunit beta-1 OS=Mus musculus OX=10090 GN=Atp1b1 PE=1 SV=1	2	5	5	5	2	1	2	2	2	2	2	2	2	4	3	4	4	2	2	2	3	3	5	3	4	3	3	4	2	1	2	2	2	2	2	2	2	4	3	4	4	2
O55143;Q8R429	O55143;Q8R429	6;3	6;3	6;3	Sarcoplasmic/endoplasmic reticulum calcium ATPase 2;Sarcoplasmic/endoplasmic reticulum calcium ATPase 1	Atp2a2;Atp2a1	sp|O55143|AT2A2_MOUSE Sarcoplasmic/endoplasmic reticulum calcium ATPase 2 OS=Mus musculus OX=10090 GN=Atp2a2 PE=1 SV=2;sp|Q8R429|AT2A1_MOUSE Sarcoplasmic/endoplasmic reticulum calcium ATPase 1 OS=Mus musculus OX=10090 GN=Atp2a1 PE=1 SV=1	2	6	6	6	0	0	0	3	3	4	0	0	1	1	2	3	1	1	3	1	2	2	1	1	2	1	1	3	0	0	0	3	3	4	0	0	1	1	2	3	1	1
G5E829;Q6Q477;E9Q828;F7AAP4;A0A1W2P7C7;A0A1W2P7R3	G5E829;Q6Q477;E9Q828;F7AAP4;A0A1W2P7C7	6;4;4;4;3;1	6;4;4;4;3;1	3;1;1;1;3;1	Plasma membrane calcium-transporting ATPase 1;Calcium-transporting ATPase	Atp2b1;Atp2b4	sp|G5E829|AT2B1_MOUSE Plasma membrane calcium-transporting ATPase 1 OS=Mus musculus OX=10090 GN=Atp2b1 PE=1 SV=1;sp|Q6Q477|AT2B4_MOUSE Plasma membrane calcium-transporting ATPase 4 OS=Mus musculus OX=10090 GN=Atp2b4 PE=1 SV=1;tr|E9Q828|E9Q828_MOUSE Calcium	6	6	6	3	0	0	0	1	0	1	4	3	2	1	1	1	0	2	6	1	1	0	0	1	1	2	0	1	0	0	0	1	0	1	4	3	2	1	1	1	0	2
Q9R0K7;S4R1C4;Q3UHH0;F8WHB1	Q9R0K7;S4R1C4;Q3UHH0;F8WHB1	3;3;3;3	1;1;1;1	1;1;1;1	Plasma membrane calcium-transporting ATPase 2;Calcium-transporting ATPase	Atp2b2	sp|Q9R0K7|AT2B2_MOUSE Plasma membrane calcium-transporting ATPase 2 OS=Mus musculus OX=10090 GN=Atp2b2 PE=1 SV=2;tr|S4R1C4|S4R1C4_MOUSE Calcium-transporting ATPase OS=Mus musculus OX=10090 GN=Atp2b2 PE=1 SV=1;tr|Q3UHH0|Q3UHH0_MOUSE Calcium-transporting ATP	4	3	1	1	0	0	0	0	0	0	2	2	1	0	0	0	0	1	3	0	0	0	0	0	0	0	0	0	0	0	0	0	0	0	1	1	0	0	0	0	0	0
Q0VF55;Q8C048;A2ALL9	Q0VF55;Q8C048;A2ALL9	4;4;4	1;1;1	1;1;1	Calcium-transporting ATPase	Atp2b3	tr|Q0VF55|Q0VF55_MOUSE Calcium-transporting ATPase OS=Mus musculus OX=10090 GN=Atp2b3 PE=1 SV=1;tr|Q8C048|Q8C048_MOUSE Calcium-transporting ATPase OS=Mus musculus OX=10090 GN=Atp2b3 PE=1 SV=1;tr|A2ALL9|A2ALL9_MOUSE Calcium-transporting ATPase OS=Mus muscul	3	4	1	1	0	0	0	1	0	1	3	2	2	0	1	1	0	2	3	1	0	0	0	0	1	1	0	1	0	0	0	0	0	0	1	0	0	0	0	0	0	0
Q03265;D3Z6F5;D6RJ16	Q03265;D3Z6F5	17;16;2	17;16;2	17;16;2	ATP synthase subunit alpha, mitochondrial;ATP synthase subunit alpha	Atp5a1	sp|Q03265|ATPA_MOUSE ATP synthase subunit alpha, mitochondrial OS=Mus musculus OX=10090 GN=Atp5f1a PE=1 SV=1;tr|D3Z6F5|D3Z6F5_MOUSE ATP synthase subunit alpha OS=Mus musculus OX=10090 GN=Atp5a1 PE=1 SV=1	3	17	17	17	7	6	7	11	8	8	12	12	12	12	7	7	7	12	12	11	5	10	8	5	6	7	5	7	7	6	7	11	8	8	12	12	12	12	7	7	7	12
P56480	P56480	12	12	12	ATP synthase subunit beta, mitochondrial	Atp5b	sp|P56480|ATPB_MOUSE ATP synthase subunit beta, mitochondrial OS=Mus musculus OX=10090 GN=Atp5f1b PE=1 SV=2	1	12	12	12	3	1	2	3	0	0	7	11	0	6	0	0	0	10	12	1	4	0	1	0	3	0	0	2	3	1	2	3	0	0	7	11	0	6	0	0	0	10
Q91VR2;Q8C2Q8;A2AKU9;A2AKV2;A2AKV3;A2AKV1;A2AKV0	Q91VR2;Q8C2Q8;A2AKU9;A2AKV2;A2AKV3;A2AKV1	7;7;7;6;6;5;2	7;7;7;6;6;5;2	7;7;7;6;6;5;2	ATP synthase subunit gamma, mitochondrial;ATP synthase subunit gamma	Atp5c1	sp|Q91VR2|ATPG_MOUSE ATP synthase subunit gamma, mitochondrial OS=Mus musculus OX=10090 GN=Atp5f1c PE=1 SV=1;tr|Q8C2Q8|Q8C2Q8_MOUSE ATP synthase subunit gamma OS=Mus musculus OX=10090 GN=Atp5c1 PE=1 SV=1;tr|A2AKU9|A2AKU9_MOUSE ATP synthase subunit gamma OS	7	7	7	7	0	1	1	1	1	1	2	2	6	1	1	1	0	2	2	6	1	1	0	1	1	2	0	1	0	1	1	1	1	1	2	2	6	1	1	1	0	2
Q9CQQ7;A0A0G2JGX3	Q9CQQ7	3;1	3;1	3;1	ATP synthase F(0) complex subunit B1, mitochondrial	Atp5f1	sp|Q9CQQ7|AT5F1_MOUSE ATP synthase F(0) complex subunit B1, mitochondrial OS=Mus musculus OX=10090 GN=Atp5pb PE=1 SV=1	2	3	3	3	0	0	0	1	0	0	1	2	1	1	0	0	0	1	2	1	0	0	0	0	0	1	0	0	0	0	0	1	0	0	1	2	1	1	0	0	0	1
Q06185	Q06185	1	1	1	ATP synthase subunit e, mitochondrial	Atp5i	sp|Q06185|ATP5I_MOUSE ATP synthase subunit e, mitochondrial OS=Mus musculus OX=10090 GN=Atp5me PE=1 SV=2	1	1	1	1	0	0	0	0	0	0	1	1	0	0	0	0	0	1	1	0	0	0	0	0	0	0	0	0	0	0	0	0	0	0	1	1	0	0	0	0	0	1
P56135;F8WHP8	P56135;F8WHP8	4;2	4;2	4;2	ATP synthase subunit f, mitochondrial	Atp5j2	sp|P56135|ATPK_MOUSE ATP synthase subunit f, mitochondrial OS=Mus musculus OX=10090 GN=Atp5mf PE=1 SV=3;tr|F8WHP8|F8WHP8_MOUSE ATP synthase membrane subunit f OS=Mus musculus OX=10090 GN=Atp5j2 PE=1 SV=1	2	4	4	4	1	1	1	2	1	1	3	3	4	2	1	1	1	3	3	4	1	2	0	2	2	1	2	0	1	1	1	2	1	1	3	3	4	2	1	1	1	3
Q9DB20;A0A338P7G3;A0A338P776;F7D3P8;F6XVM5	Q9DB20	7;3;3;3;2	7;3;3;3;2	7;3;3;3;2	ATP synthase subunit O, mitochondrial	Atp5o	sp|Q9DB20|ATPO_MOUSE ATP synthase subunit O, mitochondrial OS=Mus musculus OX=10090 GN=Atp5po PE=1 SV=1	5	7	7	7	4	4	3	5	5	4	3	4	5	5	5	4	5	4	3	5	4	4	1	3	6	5	5	4	4	4	3	5	5	4	3	4	5	5	5	4	5	4
E9Q9C5;P63082	E9Q9C5;P63082	1;1	1;1	1;1	V-type proton ATPase 16 kDa proteolipid subunit	Atp6v0c	tr|E9Q9C5|E9Q9C5_MOUSE V-type proton ATPase proteolipid subunit (Fragment) OS=Mus musculus OX=10090 GN=Atp6v0c PE=1 SV=1;sp|P63082|VATL_MOUSE V-type proton ATPase 16 kDa proteolipid subunit OS=Mus musculus OX=10090 GN=Atp6v0c PE=1 SV=1	2	1	1	1	0	0	0	0	0	0	1	1	0	0	0	0	0	0	1	0	0	0	0	0	0	0	0	0	0	0	0	0	0	0	1	1	0	0	0	0	0	0
P50516;D3YWH3;D3Z1B9;D3YZ23	P50516;D3YWH3;D3Z1B9	4;2;2;1	4;2;2;1	4;2;2;1	V-type proton ATPase catalytic subunit A	Atp6v1a	sp|P50516|VATA_MOUSE V-type proton ATPase catalytic subunit A OS=Mus musculus OX=10090 GN=Atp6v1a PE=1 SV=2;tr|D3YWH3|D3YWH3_MOUSE V-type proton ATPase catalytic subunit A (Fragment) OS=Mus musculus OX=10090 GN=Atp6v1a PE=1 SV=1;tr|D3Z1B9|D3Z1B9_MOUSE V-ty	4	4	4	4	1	0	0	0	0	0	0	0	0	2	0	0	0	0	2	0	0	0	0	0	0	0	0	0	1	0	0	0	0	0	0	0	0	2	0	0	0	0
P62814;Q91YH6	P62814;Q91YH6	2;1	2;1	2;1	V-type proton ATPase subunit B, brain isoform	Atp6v1b2;Atp6v1b1	sp|P62814|VATB2_MOUSE V-type proton ATPase subunit B, brain isoform OS=Mus musculus OX=10090 GN=Atp6v1b2 PE=1 SV=1;tr|Q91YH6|Q91YH6_MOUSE Vacuolar proton pump subunit B OS=Mus musculus OX=10090 GN=Atp6v1b1 PE=1 SV=1	2	2	2	2	0	0	0	0	0	0	1	1	0	0	0	0	0	1	2	0	0	0	0	0	0	0	0	0	0	0	0	0	0	0	1	1	0	0	0	0	0	1
P50518	P50518	1	1	1	V-type proton ATPase subunit E 1	Atp6v1e1	sp|P50518|VATE1_MOUSE V-type proton ATPase subunit E 1 OS=Mus musculus OX=10090 GN=Atp6v1e1 PE=1 SV=2	1	1	1	1	0	0	0	0	0	0	1	1	0	0	0	0	0	1	1	0	0	0	0	0	0	0	0	0	0	0	0	0	0	0	1	1	0	0	0	0	0	1
O70305;A0A286YDU2;E9QM77	O70305;A0A286YDU2;E9QM77	1;1;1	1;1;1	1;1;1	Ataxin-2	Atxn2	sp|O70305|ATX2_MOUSE Ataxin-2 OS=Mus musculus OX=10090 GN=Atxn2 PE=1 SV=1;tr|A0A286YDU2|A0A286YDU2_MOUSE Ataxin-2 (Fragment) OS=Mus musculus OX=10090 GN=Atxn2 PE=1 SV=1;tr|E9QM77|E9QM77_MOUSE Ataxin-2 OS=Mus musculus OX=10090 GN=Atxn2 PE=1 SV=1	3	1	1	1	0	0	0	0	0	0	0	0	0	0	0	0	0	1	0	0	0	0	0	0	0	0	0	0	0	0	0	0	0	0	0	0	0	0	0	0	0	1
Q80XN0	Q80XN0	1	1	1	D-beta-hydroxybutyrate dehydrogenase, mitochondrial	Bdh1	sp|Q80XN0|BDH_MOUSE D-beta-hydroxybutyrate dehydrogenase, mitochondrial OS=Mus musculus OX=10090 GN=Bdh1 PE=1 SV=2	1	1	1	1	0	0	0	0	0	0	1	1	0	0	0	0	0	1	1	0	0	0	0	0	0	0	0	0	0	0	0	0	0	0	1	1	0	0	0	0	0	1
O08539;A0A3Q4EBK4;Q6P1B9	O08539;A0A3Q4EBK4;Q6P1B9	1;1;1	1;1;1	1;1;1	Myc box-dependent-interacting protein 1	Bin1	sp|O08539|BIN1_MOUSE Myc box-dependent-interacting protein 1 OS=Mus musculus OX=10090 GN=Bin1 PE=1 SV=1;tr|A0A3Q4EBK4|A0A3Q4EBK4_MOUSE Myc box-dependent-interacting protein 1 OS=Mus musculus OX=10090 GN=Bin1 PE=1 SV=1;tr|Q6P1B9|Q6P1B9_MOUSE Bin1 protein OS	3	1	1	1	0	0	0	0	0	0	0	1	0	0	0	0	0	0	0	0	0	0	0	0	0	0	0	0	0	0	0	0	0	0	0	1	0	0	0	0	0	0
O88737;V9GX98;Q9QYX7;S4R2E0	O88737	44;4;2;2	44;4;2;2	44;4;2;2	Protein bassoon	Bsn	sp|O88737|BSN_MOUSE Protein bassoon OS=Mus musculus OX=10090 GN=Bsn PE=1 SV=4	4	44	44	44	0	0	1	0	0	0	22	18	34	0	0	0	0	19	13	25	0	0	0	0	0	0	0	0	0	0	1	0	0	0	22	18	34	0	0	0	0	19
P98086	P98086	5	5	5	Complement C1q subcomponent subunit A	C1qa	sp|P98086|C1QA_MOUSE Complement C1q subcomponent subunit A OS=Mus musculus OX=10090 GN=C1qa PE=1 SV=2	1	5	5	5	0	2	2	2	3	2	1	1	3	2	3	2	2	1	1	3	2	2	0	2	2	3	2	2	0	2	2	2	3	2	1	1	3	2	3	2	2	1
P14106	P14106	5	5	5	Complement C1q subcomponent subunit B	C1qb	sp|P14106|C1QB_MOUSE Complement C1q subcomponent subunit B OS=Mus musculus OX=10090 GN=C1qb PE=1 SV=2	1	5	5	5	3	4	4	2	4	4	3	3	5	4	4	4	3	3	3	5	3	2	1	3	3	4	2	4	3	4	4	2	4	4	3	3	5	4	4	4	3	3
Q02105	Q02105	4	4	4	Complement C1q subcomponent subunit C	C1qc	sp|Q02105|C1QC_MOUSE Complement C1q subcomponent subunit C OS=Mus musculus OX=10090 GN=C1qc PE=1 SV=2	1	4	4	4	2	3	2	3	3	1	2	2	4	3	2	2	1	2	2	4	3	2	1	3	3	2	1	1	2	3	2	3	3	1	2	2	4	3	2	2	1	2
Q80X80	Q80X80	1	1	1	C2 domain-containing protein 2-like	C2cd2l	sp|Q80X80|C2C2L_MOUSE Phospholipid transfer protein C2CD2L OS=Mus musculus OX=10090 GN=C2cd2l PE=1 SV=3	1	1	1	1	0	0	0	0	0	0	1	1	0	0	0	0	0	0	0	0	0	0	0	0	0	0	0	0	0	0	0	0	0	0	1	1	0	0	0	0	0	0
P01027	P01027	3	3	3	Complement C3;Complement C3 beta chain;C3-beta-c;Complement C3 alpha chain;C3a anaphylatoxin;Acylation stimulating protein;Complement C3b alpha chain;Complement C3c alpha chain fragment 1;Complement C3dg fragment;Complement C3g fragment;Complement C3d fragment;Complement C3f fragment;Complement C3c alpha chain fragment 2	C3	sp|P01027|CO3_MOUSE Complement C3 OS=Mus musculus OX=10090 GN=C3 PE=1 SV=3	1	3	3	3	0	0	0	2	0	0	0	0	0	1	1	0	1	0	0	0	0	0	0	0	0	1	3	2	0	0	0	2	0	0	0	0	0	1	1	0	1	0
P01029	P01029	3	2	2	Complement C4-B;Complement C4 beta chain;Complement C4 alpha chain;C4a anaphylatoxin;Complement C4 gamma chain	C4b	sp|P01029|CO4B_MOUSE Complement C4-B OS=Mus musculus OX=10090 GN=C4b PE=1 SV=3	1	3	2	2	0	0	1	3	0	2	0	0	1	0	2	2	1	0	0	1	0	0	0	0	0	2	1	1	0	0	1	2	0	1	0	0	1	0	1	1	1	0
P06684	P06684	2	2	2	Complement C5;Complement C5 beta chain;Complement C5 alpha chain;C5a anaphylatoxin;Complement C5 alpha chain	C5	sp|P06684|CO5_MOUSE Complement C5 OS=Mus musculus OX=10090 GN=C5 PE=1 SV=2	1	2	2	2	0	0	0	2	2	2	0	0	0	1	2	2	1	0	0	0	0	0	0	0	2	2	1	2	0	0	0	2	2	2	0	0	0	1	2	2	1	0
O88602	O88602	3	3	3	Voltage-dependent calcium channel gamma-2 subunit	Cacng2	sp|O88602|CCG2_MOUSE Voltage-dependent calcium channel gamma-2 subunit OS=Mus musculus OX=10090 GN=Cacng2 PE=1 SV=1	1	3	3	3	0	0	0	2	3	1	0	0	0	1	2	1	2	2	2	0	0	1	2	2	2	2	2	2	0	0	0	2	3	1	0	0	0	1	2	1	2	2
Q9JJV5	Q9JJV5	1	1	1	Voltage-dependent calcium channel gamma-3 subunit	Cacng3	sp|Q9JJV5|CCG3_MOUSE Voltage-dependent calcium channel gamma-3 subunit OS=Mus musculus OX=10090 GN=Cacng3 PE=1 SV=2	1	1	1	1	0	0	0	0	1	1	0	0	0	0	1	0	1	0	0	0	1	0	1	0	1	0	1	1	0	0	0	0	1	1	0	0	0	0	1	0	1	0
Q8VHW2;F7CZ64;A0A0N4SWF8	Q8VHW2;F7CZ64	9;9;1	9;9;1	9;9;1	Voltage-dependent calcium channel gamma-8 subunit;Voltage-dependent calcium channel gamma subunit	Cacng8	sp|Q8VHW2|CCG8_MOUSE Voltage-dependent calcium channel gamma-8 subunit OS=Mus musculus OX=10090 GN=Cacng8 PE=1 SV=1;tr|F7CZ64|F7CZ64_MOUSE Voltage-dependent calcium channel gamma-8 subunit OS=Mus musculus OX=10090 GN=Cacng8 PE=1 SV=2	3	9	9	9	0	0	0	1	0	2	0	0	1	5	6	5	4	0	0	2	5	7	5	4	6	5	5	5	0	0	0	1	0	2	0	0	1	5	6	5	4	0
P11798;F8WIS9;F8WHB5;D3Z7K9	P11798;F8WIS9;F8WHB5	7;6;4;1	7;6;4;1	5;4;4;1	Calcium/calmodulin-dependent protein kinase type II subunit alpha	Camk2a	sp|P11798|KCC2A_MOUSE Calcium/calmodulin-dependent protein kinase type II subunit alpha OS=Mus musculus OX=10090 GN=Camk2a PE=1 SV=2;tr|F8WIS9|F8WIS9_MOUSE Calcium/calmodulin-dependent protein kinase OS=Mus musculus OX=10090 GN=Camk2a PE=1 SV=1;tr|F8WHB5|F	4	7	7	5	0	0	1	1	0	0	6	6	3	0	3	0	0	7	5	3	2	2	0	1	1	1	2	0	0	0	1	1	0	0	6	6	3	0	3	0	0	7
P28652;Q5SVJ0;Q5SVI3;Q5SVI9;Q5SVI1;Q68EG2;Q5SVI2;Q5SVI0;Q5SVJ1;Q8CCM0;E9Q1V9;Q6PHZ2;E9Q1T1;A0A0G2JGS4;E9Q1W0;A0A2I3BQP6;Q923T9;A0A286YCW8;F6WHR9;A0A286YDL6;A0A286YCB8;A0A286YDK9	P28652;Q5SVJ0;Q5SVI3;Q5SVI9;Q5SVI1;Q68EG2;Q5SVI2;Q5SVI0;Q5SVJ1	6;6;6;5;5;5;5;5;5;2;2;2;2;2;2;2;2;1;1;1;1;1	4;4;4;3;3;3;3;3;3;0;0;0;0;0;0;1;1;1;0;1;1;1	4;4;4;3;3;3;3;3;3;0;0;0;0;0;0;1;1;1;0;1;1;1	Calcium/calmodulin-dependent protein kinase type II subunit beta	Camk2b	sp|P28652|KCC2B_MOUSE Calcium/calmodulin-dependent protein kinase type II subunit beta OS=Mus musculus OX=10090 GN=Camk2b PE=1 SV=2;tr|Q5SVJ0|Q5SVJ0_MOUSE Calcium/calmodulin-dependent protein kinase OS=Mus musculus OX=10090 GN=Camk2b PE=1 SV=1;tr|Q5SVI3|Q5	22	6	4	4	0	0	0	1	0	0	5	5	3	0	1	0	0	5	4	3	1	2	1	1	1	2	1	1	0	0	0	1	0	0	3	3	1	0	0	0	0	3
Q3UHL1;A0A0A6YW88;A0A0A6YXI7;A0A0A6YW08	Q3UHL1;A0A0A6YW88	4;4;1;1	4;4;1;1	4;4;1;1	CaM kinase-like vesicle-associated protein	Camkv	sp|Q3UHL1|CAMKV_MOUSE CaM kinase-like vesicle-associated protein OS=Mus musculus OX=10090 GN=Camkv PE=1 SV=2;tr|A0A0A6YW88|A0A0A6YW88_MOUSE CaM kinase-like vesicle-associated protein OS=Mus musculus OX=10090 GN=Camkv PE=1 SV=1	4	4	4	4	0	0	0	1	0	1	1	3	0	1	0	0	1	1	0	1	0	0	0	0	0	0	0	1	0	0	0	1	0	1	1	3	0	1	0	0	1	1
P47754;A0A0N4SVM0;D6RCW7;P47753;A0A0G2JE27;Q5RKN9	P47754;A0A0N4SVM0;D6RCW7;P47753;A0A0G2JE27;Q5RKN9	2;2;2;1;1;1	2;2;2;1;1;1	2;2;2;1;1;1	F-actin-capping protein subunit alpha-2;F-actin-capping protein subunit alpha-1	Capza2;Capza1	sp|P47754|CAZA2_MOUSE F-actin-capping protein subunit alpha-2 OS=Mus musculus OX=10090 GN=Capza2 PE=1 SV=3;tr|A0A0N4SVM0|A0A0N4SVM0_MOUSE F-actin-capping protein subunit alpha (Fragment) OS=Mus musculus OX=10090 GN=Capza2 PE=1 SV=1;tr|D6RCW7|D6RCW7_MOUSE F	6	2	2	2	0	0	0	0	0	0	2	2	0	0	0	0	0	2	2	0	0	0	0	0	0	0	0	0	0	0	0	0	0	0	2	2	0	0	0	0	0	2
Q7TT50	Q7TT50	3	3	3	Serine/threonine-protein kinase MRCK beta	Cdc42bpb	sp|Q7TT50|MRCKB_MOUSE Serine/threonine-protein kinase MRCK beta OS=Mus musculus OX=10090 GN=Cdc42bpb PE=1 SV=2	1	3	3	3	0	0	0	0	0	0	1	0	2	0	0	0	0	0	0	1	0	0	0	0	0	0	0	0	0	0	0	0	0	0	1	0	2	0	0	0	0	0
E9Q7R9	E9Q7R9	1	1	1		Cfap43	sp|E9Q7R9|CFA43_MOUSE Cilia- and flagella-associated protein 43 OS=Mus musculus OX=10090 GN=Cfap43 PE=1 SV=1	1	1	1	1	0	0	0	0	0	0	0	0	0	0	1	0	0	0	0	0	0	0	0	0	0	0	0	0	0	0	0	0	0	0	0	0	0	0	1	0	0	0
B2RW38	B2RW38	1	1	1	Cilia- and flagella-associated protein 58	Cfap58	sp|B2RW38|CFA58_MOUSE Cilia- and flagella-associated protein 58 OS=Mus musculus OX=10090 GN=Cfap58 PE=2 SV=1	1	1	1	1	0	0	0	0	0	0	0	0	0	1	0	0	0	0	0	0	0	0	0	0	0	0	0	0	0	0	0	0	0	0	0	0	0	1	0	0	0	0
P18760;A0A494B9A7;F8WGL3;P45591	P18760;A0A494B9A7;F8WGL3	3;3;3;1	3;3;3;1	3;3;3;1	Cofilin-1	Cfl1	sp|P18760|COF1_MOUSE Cofilin-1 OS=Mus musculus OX=10090 GN=Cfl1 PE=1 SV=3;tr|A0A494B9A7|A0A494B9A7_MOUSE Cofilin, non-muscle isoform OS=Mus musculus OX=10090 GN=Cfl1 PE=1 SV=1;tr|F8WGL3|F8WGL3_MOUSE Cofilin, non-muscle isoform OS=Mus musculus OX=10090 GN=C	4	3	3	3	0	0	0	0	0	0	3	3	0	0	0	0	0	3	3	0	0	0	0	0	0	0	0	0	0	0	0	0	0	0	3	3	0	0	0	0	0	3
Q04447	Q04447	6	6	6	Creatine kinase B-type	Ckb	sp|Q04447|KCRB_MOUSE Creatine kinase B-type OS=Mus musculus OX=10090 GN=Ckb PE=1 SV=1	1	6	6	6	0	0	0	0	0	0	2	5	1	2	0	0	0	1	5	1	1	0	0	0	1	0	0	0	0	0	0	0	0	0	2	5	1	2	0	0	0	1
P30275;A2ARP5	P30275;A2ARP5	1;1	1;1	1;1	Creatine kinase U-type, mitochondrial	Ckmt1	sp|P30275|KCRU_MOUSE Creatine kinase U-type, mitochondrial OS=Mus musculus OX=10090 GN=Ckmt1 PE=1 SV=1;tr|A2ARP5|A2ARP5_MOUSE Creatine kinase (Fragment) OS=Mus musculus OX=10090 GN=Ckmt1 PE=1 SV=1	2	1	1	1	0	0	0	0	0	0	1	1	0	0	0	0	0	1	1	0	0	0	0	0	0	0	0	0	0	0	0	0	0	0	1	1	0	0	0	0	0	1
Q68FD5;Q5SXR6	Q68FD5;Q5SXR6	13;13	13;13	13;13	Clathrin heavy chain 1;Clathrin heavy chain	Cltc	sp|Q68FD5|CLH1_MOUSE Clathrin heavy chain 1 OS=Mus musculus OX=10090 GN=Cltc PE=1 SV=3;tr|Q5SXR6|Q5SXR6_MOUSE Clathrin heavy chain OS=Mus musculus OX=10090 GN=Cltc PE=1 SV=1	2	13	13	13	2	2	1	5	0	3	3	3	4	4	0	5	0	2	5	4	1	0	1	1	0	2	1	2	2	2	1	5	0	3	3	3	4	4	0	5	0	2
Q9D4C9	Q9D4C9	1	1	1	Clavesin-1	Clvs1	sp|Q9D4C9|CLVS1_MOUSE Clavesin-1 OS=Mus musculus OX=10090 GN=Clvs1 PE=1 SV=1	1	1	1	1	0	0	0	0	0	0	0	1	1	0	0	0	0	0	0	1	0	0	0	0	0	0	0	0	0	0	0	0	0	0	0	1	1	0	0	0	0	0
A0A494B9S6;O35089	A0A494B9S6;O35089	2;2	2;2	2;2	Protein cornichon homolog 2	Cnih2	tr|A0A494B9S6|A0A494B9S6_MOUSE Protein cornichon homolog 2 OS=Mus musculus OX=10090 GN=Cnih2 PE=1 SV=1;sp|O35089|CNIH2_MOUSE Protein cornichon homolog 2 OS=Mus musculus OX=10090 GN=Cnih2 PE=1 SV=2	2	2	2	2	0	0	0	2	2	2	0	0	0	2	2	2	2	1	1	0	2	2	2	2	2	2	2	2	0	0	0	2	2	2	0	0	0	2	2	2	2	1
P16330	P16330	10	10	10	2,3-cyclic-nucleotide 3-phosphodiesterase	Cnp	sp|P16330|CN37_MOUSE 2,3-cyclic-nucleotide 3-phosphodiesterase OS=Mus musculus OX=10090 GN=Cnp PE=1 SV=3	1	10	10	10	1	1	1	4	2	2	5	6	9	3	3	3	2	6	5	9	2	2	4	3	2	4	2	2	1	1	1	4	2	2	5	6	9	3	3	3	2	6
P12960	P12960	3	3	3	Contactin-1	Cntn1	sp|P12960|CNTN1_MOUSE Contactin-1 OS=Mus musculus OX=10090 GN=Cntn1 PE=1 SV=1	1	3	3	3	0	0	0	0	0	0	1	2	1	1	0	0	0	1	1	0	0	0	0	0	0	0	0	0	0	0	0	0	0	0	1	2	1	1	0	0	0	1
O54991	O54991	2	2	2	Contactin-associated protein 1	Cntnap1	sp|O54991|CNTP1_MOUSE Contactin-associated protein 1 OS=Mus musculus OX=10090 GN=Cntnap1 PE=1 SV=2	1	2	2	2	0	0	0	0	0	0	1	0	0	0	0	0	0	1	0	1	0	0	0	0	0	0	0	0	0	0	0	0	0	0	1	0	0	0	0	0	0	1
P19783;M0QWX7	P19783;M0QWX7	2;1	2;1	2;1	Cytochrome c oxidase subunit 4 isoform 1, mitochondrial	Cox4i1	sp|P19783|COX41_MOUSE Cytochrome c oxidase subunit 4 isoform 1, mitochondrial OS=Mus musculus OX=10090 GN=Cox4i1 PE=1 SV=2;tr|M0QWX7|M0QWX7_MOUSE Cytochrome c oxidase subunit 4 (Fragment) OS=Mus musculus OX=10090 GN=Cox4i1 PE=1 SV=1	2	2	2	2	0	0	0	0	0	0	1	2	0	0	0	0	0	1	2	0	0	0	0	0	0	0	0	0	0	0	0	0	0	0	1	2	0	0	0	0	0	1
Q8BLR2;Q9D6C8;A0A1L1SSY1	Q8BLR2;Q9D6C8;A0A1L1SSY1	2;2;1	2;2;1	1;1;1	Copine-4	Cpne4	sp|Q8BLR2|CPNE4_MOUSE Copine-4 OS=Mus musculus OX=10090 GN=Cpne4 PE=1 SV=1;tr|Q9D6C8|Q9D6C8_MOUSE Copine-4 OS=Mus musculus OX=10090 GN=Cpne4 PE=1 SV=1;tr|A0A1L1SSY1|A0A1L1SSY1_MOUSE Copine-4 (Fragment) OS=Mus musculus OX=10090 GN=Cpne4 PE=1 SV=1	3	2	2	1	0	0	0	0	0	0	0	2	0	0	0	0	0	0	0	0	0	0	0	0	0	0	0	0	0	0	0	0	0	0	0	2	0	0	0	0	0	0
Q8BGD5;A0A1D5RLH1	Q8BGD5	5;1	5;1	5;1	Carnitine O-palmitoyltransferase 1, brain isoform	Cpt1c	sp|Q8BGD5|CPT1C_MOUSE Carnitine O-palmitoyltransferase 1, brain isoform OS=Mus musculus OX=10090 GN=Cpt1c PE=1 SV=1	2	5	5	5	0	0	0	2	1	0	0	0	0	0	2	4	1	0	0	0	3	3	0	0	2	2	0	3	0	0	0	2	1	0	0	0	0	0	2	4	1	0
Q9CZU6;Q80X68	Q9CZU6;Q80X68	2;1	2;1	2;1	Citrate synthase, mitochondrial;Citrate synthase	Cs;Csl	sp|Q9CZU6|CISY_MOUSE Citrate synthase, mitochondrial OS=Mus musculus OX=10090 GN=Cs PE=1 SV=1;tr|Q80X68|Q80X68_MOUSE Citrate synthase OS=Mus musculus OX=10090 GN=Csl PE=1 SV=1	2	2	2	2	0	0	0	0	0	0	1	2	0	0	0	0	0	0	2	0	0	0	0	0	0	0	0	0	0	0	0	0	0	0	1	2	0	0	0	0	0	0
Q8C1F4	Q8C1F4	1	1	1	Chondroitin sulfate N-acetylgalactosaminyltransferase 2	Csgalnact2	sp|Q8C1F4|CGAT2_MOUSE Chondroitin sulfate N-acetylgalactosaminyltransferase 2 OS=Mus musculus OX=10090 GN=Csgalnact2 PE=2 SV=1	1	1	1	1	0	0	0	0	0	0	0	0	0	1	0	0	1	0	0	0	0	0	0	0	0	0	1	0	0	0	0	0	0	0	0	0	0	1	0	0	1	0
Q9D0M3;A0A2R8VHK1	Q9D0M3;A0A2R8VHK1	5;3	5;3	5;3	Cytochrome c1, heme protein, mitochondrial	Cyc1	sp|Q9D0M3|CY1_MOUSE Cytochrome c1, heme protein, mitochondrial OS=Mus musculus OX=10090 GN=Cyc1 PE=1 SV=1;tr|A0A2R8VHK1|A0A2R8VHK1_MOUSE Cytochrome c1, heme protein, mitochondrial (Fragment) OS=Mus musculus OX=10090 GN=Cyc1 PE=1 SV=1	2	5	5	5	1	2	2	0	1	2	4	4	3	2	2	3	1	3	4	4	2	2	2	2	2	2	3	0	1	2	2	0	1	2	4	4	3	2	2	3	1	3
Q5SQX6;Q7TMB8;F6QD74;A0A0R4J119;A0A0U1RQ05;G3UZI5	Q5SQX6;Q7TMB8;F6QD74;A0A0R4J119	5;3;3;3;2;1	5;3;3;3;2;1	5;3;3;3;2;1	Cytoplasmic FMR1-interacting protein 2;Cytoplasmic FMR1-interacting protein 1	Cyfip2;Cyfip1	sp|Q5SQX6|CYFP2_MOUSE Cytoplasmic FMR1-interacting protein 2 OS=Mus musculus OX=10090 GN=Cyfip2 PE=1 SV=2;sp|Q7TMB8|CYFP1_MOUSE Cytoplasmic FMR1-interacting protein 1 OS=Mus musculus OX=10090 GN=Cyfip1 PE=1 SV=1;tr|F6QD74|F6QD74_MOUSE Cytoplasmic FMR1-inte	6	5	5	5	0	0	0	0	0	0	3	0	0	0	0	0	0	1	3	0	0	0	0	0	0	0	0	0	0	0	0	0	0	0	3	0	0	0	0	0	0	1
L7N463	L7N463	1	1	1		Cyp2d34	tr|L7N463|L7N463_MOUSE Cytochrome P450, family 2, subfamily d, polypeptide 34 OS=Mus musculus OX=10090 GN=Cyp2d34 PE=3 SV=1	1	1	1	1	0	0	0	0	0	0	1	0	0	0	0	0	0	0	1	0	0	0	0	0	1	0	0	0	0	0	0	0	0	0	1	0	0	0	0	0	0	0
Q91VR5	Q91VR5	1	1	1	ATP-dependent RNA helicase DDX1	Ddx1	sp|Q91VR5|DDX1_MOUSE ATP-dependent RNA helicase DDX1 OS=Mus musculus OX=10090 GN=Ddx1 PE=1 SV=1	1	1	1	1	0	0	0	0	0	0	0	0	1	0	0	0	0	0	0	0	0	0	0	0	0	0	0	0	0	0	0	0	0	0	0	0	1	0	0	0	0	0
Q62167;Q62095;P16381	Q62167;Q62095;P16381	2;2;2	2;2;2	2;2;2	ATP-dependent RNA helicase DDX3X;ATP-dependent RNA helicase DDX3Y;Putative ATP-dependent RNA helicase Pl10	Ddx3x;Ddx3y;D1Pas1	sp|Q62167|DDX3X_MOUSE ATP-dependent RNA helicase DDX3X OS=Mus musculus OX=10090 GN=Ddx3x PE=1 SV=3;sp|Q62095|DDX3Y_MOUSE ATP-dependent RNA helicase DDX3Y OS=Mus musculus OX=10090 GN=Ddx3y PE=1 SV=2;sp|P16381|DDX3L_MOUSE Putative ATP-dependent RNA helicase	3	2	2	2	0	0	0	0	0	0	0	0	1	1	0	0	0	0	0	0	0	0	0	0	0	0	0	0	0	0	0	0	0	0	0	0	1	1	0	0	0	0
Q61656;Q8BTS0;Q501J6;Q3U741;S4R1I6;Q3TU25	Q61656;Q8BTS0;Q501J6;Q3U741;S4R1I6;Q3TU25	2;2;1;1;1;1	2;2;1;1;1;1	2;2;1;1;1;1	Probable ATP-dependent RNA helicase DDX5;Probable ATP-dependent RNA helicase DDX17	Ddx5;Ddx17	sp|Q61656|DDX5_MOUSE Probable ATP-dependent RNA helicase DDX5 OS=Mus musculus OX=10090 GN=Ddx5 PE=1 SV=2;tr|Q8BTS0|Q8BTS0_MOUSE DEAD box protein 5 OS=Mus musculus OX=10090 GN=Ddx5 PE=1 SV=1;sp|Q501J6|DDX17_MOUSE Probable ATP-dependent RNA helicase DDX17 OS	6	2	2	2	0	0	1	0	0	0	0	0	2	0	0	0	0	0	0	0	0	0	0	0	0	0	0	0	0	0	1	0	0	0	0	0	2	0	0	0	0	0
O70133;E9QNN1;A0A087WPL5	O70133;E9QNN1;A0A087WPL5	1;1;1	1;1;1	1;1;1	ATP-dependent RNA helicase A	Dhx9	sp|O70133|DHX9_MOUSE ATP-dependent RNA helicase A OS=Mus musculus OX=10090 GN=Dhx9 PE=1 SV=2;tr|E9QNN1|E9QNN1_MOUSE DEAH box protein 9 OS=Mus musculus OX=10090 GN=Dhx9 PE=1 SV=1;tr|A0A087WPL5|A0A087WPL5_MOUSE DEAH box protein 9 OS=Mus musculus OX=10090 GN=	3	1	1	1	0	0	0	1	0	1	0	0	0	0	1	1	0	0	0	0	0	0	0	0	0	0	0	0	0	0	0	1	0	1	0	0	0	0	1	1	0	0
Q8BMF4	Q8BMF4	4	4	4	Dihydrolipoyllysine-residue acetyltransferase component of pyruvate dehydrogenase complex, mitochondrial	Dlat	sp|Q8BMF4|ODP2_MOUSE Dihydrolipoyllysine-residue acetyltransferase component of pyruvate dehydrogenase complex, mitochondrial OS=Mus musculus OX=10090 GN=Dlat PE=1 SV=2	1	4	4	4	0	0	1	1	1	1	2	1	1	1	0	1	0	2	1	0	0	1	0	0	0	1	0	1	0	0	1	1	1	1	2	1	1	1	0	1	0	2
O08749	O08749	2	2	2	Dihydrolipoyl dehydrogenase, mitochondrial	Dld	sp|O08749|DLDH_MOUSE Dihydrolipoyl dehydrogenase, mitochondrial OS=Mus musculus OX=10090 GN=Dld PE=1 SV=2	1	2	2	2	0	0	0	0	0	0	0	0	0	0	0	0	0	2	2	0	0	0	0	0	0	0	0	0	0	0	0	0	0	0	0	0	0	0	0	0	0	2
Q9D2G2	Q9D2G2	4	4	4	Dihydrolipoyllysine-residue succinyltransferase component of 2-oxoglutarate dehydrogenase complex, mitochondrial	Dlst	sp|Q9D2G2|ODO2_MOUSE Dihydrolipoyllysine-residue succinyltransferase component of 2-oxoglutarate dehydrogenase complex, mitochondrial OS=Mus musculus OX=10090 GN=Dlst PE=1 SV=1	1	4	4	4	0	0	0	0	0	0	4	4	3	0	0	0	0	4	4	3	0	1	0	0	0	0	0	0	0	0	0	0	0	0	4	4	3	0	0	0	0	4
D3Z0D9	D3Z0D9	1	1	1		Dnajc12	tr|D3Z0D9|D3Z0D9_MOUSE DnaJ homolog subfamily C member 12 (Fragment) OS=Mus musculus OX=10090 GN=Dnajc12 PE=1 SV=1	1	1	1	1	1	0	0	0	0	0	0	0	0	0	1	0	1	0	0	0	0	0	0	0	0	0	0	0	1	0	0	0	0	0	0	0	0	0	1	0	1	0
Q80TZ3;B1B0B7;B1B0B8	Q80TZ3;B1B0B7;B1B0B8	5;5;4	5;5;4	5;5;4	Putative tyrosine-protein phosphatase auxilin	Dnajc6	sp|Q80TZ3|AUXI_MOUSE Putative tyrosine-protein phosphatase auxilin OS=Mus musculus OX=10090 GN=Dnajc6 PE=1 SV=2;tr|B1B0B7|B1B0B7_MOUSE Putative tyrosine-protein phosphatase auxilin (Fragment) OS=Mus musculus OX=10090 GN=Dnajc6 PE=1 SV=2;tr|B1B0B8|B1B0B8_MO	3	5	5	5	0	0	0	0	0	0	3	2	4	0	0	0	0	0	1	1	0	0	0	0	0	0	0	0	0	0	0	0	0	0	3	2	4	0	0	0	0	0
A0A0J9YUE9;A0A0J9YUN4;P39053;F6W8Z8;D6RH60;G3UY64	A0A0J9YUE9;A0A0J9YUN4;P39053	19;19;18;4;3;1	19;19;18;4;3;1	14;14;13;3;2;0	Dynamin-1	Dnm1	tr|A0A0J9YUE9|A0A0J9YUE9_MOUSE Dynamin GTPase OS=Mus musculus OX=10090 GN=Dnm1 PE=1 SV=1;tr|A0A0J9YUN4|A0A0J9YUN4_MOUSE Dynamin GTPase OS=Mus musculus OX=10090 GN=Dnm1 PE=1 SV=1;sp|P39053|DYN1_MOUSE Dynamin-1 OS=Mus musculus OX=10090 GN=Dnm1 PE=1 SV=2	6	19	19	14	1	1	0	2	0	1	13	11	12	0	0	1	0	9	12	9	0	0	0	0	1	1	0	0	1	1	0	2	0	1	13	11	12	0	0	1	0	9
P39054;Q3T9X3;Q3TCR7;G3X9G4;F8WIV5;G3UZZ3	P39054;Q3T9X3;Q3TCR7;G3X9G4;F8WIV5;G3UZZ3	5;5;5;5;5;4	1;1;1;1;1;1	1;1;1;1;1;1	Dynamin-2	Dnm2	sp|P39054|DYN2_MOUSE Dynamin-2 OS=Mus musculus OX=10090 GN=Dnm2 PE=1 SV=2;tr|Q3T9X3|Q3T9X3_MOUSE Dynamin GTPase OS=Mus musculus OX=10090 GN=Dnm2 PE=1 SV=1;tr|Q3TCR7|Q3TCR7_MOUSE Dynamin GTPase OS=Mus musculus OX=10090 GN=Dnm2 PE=1 SV=1;tr|G3X9G4|G3X9G4_MOU	6	5	1	1	1	0	0	0	0	0	2	2	3	0	0	0	0	1	2	2	0	0	0	0	0	0	0	0	0	0	0	0	0	0	1	1	1	0	0	0	0	1
Q8BZ98;E9QLL2	Q8BZ98;E9QLL2	5;5	1;1	0;0	Dynamin-3	Dnm3	sp|Q8BZ98|DYN3_MOUSE Dynamin-3 OS=Mus musculus OX=10090 GN=Dnm3 PE=1 SV=1;tr|E9QLL2|E9QLL2_MOUSE Dynamin GTPase OS=Mus musculus OX=10090 GN=Dnm3 PE=1 SV=1	2	5	1	0	1	0	0	0	0	1	1	1	2	0	0	0	0	0	1	2	0	0	0	0	0	0	0	0	0	0	0	0	0	0	1	0	0	0	0	0	0	0
O08553;P97427;Q6P1J1;Q62188;Q71H75;Q3TT92;E9PWE8	O08553	8;2;2;1;1;1;1	8;2;2;1;1;1;1	8;2;2;1;1;1;1	Dihydropyrimidinase-related protein 2	Dpysl2	sp|O08553|DPYL2_MOUSE Dihydropyrimidinase-related protein 2 OS=Mus musculus OX=10090 GN=Dpysl2 PE=1 SV=2	7	8	8	8	3	2	3	2	0	1	4	3	4	5	0	0	0	3	4	1	2	2	0	0	0	0	0	1	3	2	3	2	0	1	4	3	4	5	0	0	0	3
P63168;Q9D0M5	P63168;Q9D0M5	1;1	1;1	1;1	Dynein light chain 1, cytoplasmic;Dynein light chain 2, cytoplasmic	Dynll1;Dynll2	sp|P63168|DYL1_MOUSE Dynein light chain 1, cytoplasmic OS=Mus musculus OX=10090 GN=Dynll1 PE=1 SV=1;sp|Q9D0M5|DYL2_MOUSE Dynein light chain 2, cytoplasmic OS=Mus musculus OX=10090 GN=Dynll2 PE=1 SV=1	2	1	1	1	0	0	0	0	0	0	0	0	1	0	0	0	0	0	0	1	0	0	0	0	0	0	0	0	0	0	0	0	0	0	0	0	1	0	0	0	0	0
Q9QZH6;A0A0R4J174	Q9QZH6;A0A0R4J174	1;1	1;1	1;1	Evolutionarily conserved signaling intermediate in Toll pathway, mitochondrial	Ecsit	sp|Q9QZH6|ECSIT_MOUSE Evolutionarily conserved signaling intermediate in Toll pathway, mitochondrial OS=Mus musculus OX=10090 GN=Ecsit PE=1 SV=2;tr|A0A0R4J174|A0A0R4J174_MOUSE Evolutionarily conserved signaling intermediate in Toll pathway, mitochondrial O	2	1	1	1	0	0	0	0	0	0	1	1	0	0	0	0	0	1	1	0	0	0	0	0	0	0	0	0	0	0	0	0	0	0	1	1	0	0	0	0	0	1
P10126;D3Z3I8;D3YZ68	P10126	7;3;3	7;3;3	2;1;1	Elongation factor 1-alpha 1	Eef1a1	sp|P10126|EF1A1_MOUSE Elongation factor 1-alpha 1 OS=Mus musculus OX=10090 GN=Eef1a1 PE=1 SV=3	3	7	7	2	0	1	0	1	1	1	4	4	3	1	0	0	1	4	4	3	0	1	1	0	0	0	0	0	0	1	0	1	1	1	4	4	3	1	0	0	1	4
P62631	P62631	6	1	1	Elongation factor 1-alpha 2	Eef1a2	sp|P62631|EF1A2_MOUSE Elongation factor 1-alpha 2 OS=Mus musculus OX=10090 GN=Eef1a2 PE=1 SV=1	1	6	1	1	0	1	0	1	1	1	4	4	2	0	0	0	1	4	4	3	0	1	1	0	0	0	0	0	0	0	0	0	0	0	1	1	0	0	0	0	0	1
Q9D9T8;B2CKC6	Q9D9T8;B2CKC6	1;1	1;1	1;1	EF-hand domain-containing protein 1	Efhc1	sp|Q9D9T8|EFHC1_MOUSE EF-hand domain-containing protein 1 OS=Mus musculus OX=10090 GN=Efhc1 PE=1 SV=1;tr|B2CKC6|B2CKC6_MOUSE EF-hand domain containing 1 OS=Mus musculus OX=10090 GN=Efhc1 PE=1 SV=1	2	1	1	1	0	0	0	0	1	0	0	1	0	1	0	0	1	1	1	0	0	0	0	0	0	0	0	0	0	0	0	0	1	0	0	1	0	1	0	0	1	1
Q62448	Q62448	17	1	1	Eukaryotic translation initiation factor 4 gamma 2	Eif4g2	sp|Q62448|IF4G2_MOUSE Eukaryotic translation initiation factor 4 gamma 2 OS=Mus musculus OX=10090 GN=Eif4g2 PE=1 SV=2	1	17	1	1	0	0	0	0	0	0	9	8	12	0	0	0	1	4	4	13	0	0	0	0	0	0	0	1	0	0	0	0	0	0	0	0	1	0	0	0	0	0
G3XA17;F7CBP1;F6TW20	G3XA17;F7CBP1	17;16;1	17;16;1	1;1;0		Eif4g2	tr|G3XA17|G3XA17_MOUSE Eukaryotic translation initiation factor 4 gamma 2 OS=Mus musculus OX=10090 GN=Eif4g2 PE=1 SV=1;tr|F7CBP1|F7CBP1_MOUSE Eukaryotic translation initiation factor 4 gamma 2 OS=Mus musculus OX=10090 GN=Eif4g2 PE=1 SV=1	3	17	17	1	0	0	0	0	0	0	10	9	11	0	0	0	1	5	4	12	0	0	0	0	0	0	0	1	0	0	0	0	0	0	10	9	11	0	0	0	1	5
Q9CRD2	Q9CRD2	1	1	1	ER membrane protein complex subunit 2	Emc2	sp|Q9CRD2|EMC2_MOUSE ER membrane protein complex subunit 2 OS=Mus musculus OX=10090 GN=Emc2 PE=1 SV=1	1	1	1	1	0	0	0	0	0	0	0	0	1	0	0	0	0	0	0	1	0	0	0	0	0	0	0	0	0	0	0	0	0	0	0	0	1	0	0	0	0	0
P17182;B0QZL1;Q6PHC1;P21550;P17183;A0A0N4SUI6;B1ARR6;Q5SX61;Q5SX60;B1ARR7;D3YVD3;D3Z2S4;Q5SX59;D3Z6E4;A0A0N4SUX5	P17182;B0QZL1;Q6PHC1	4;3;3;1;1;1;1;1;1;1;1;1;1;1;1	4;3;3;1;1;1;1;1;1;1;1;1;1;1;1	4;3;3;1;1;1;1;1;1;1;1;1;1;1;1	Alpha-enolase;Enolase	Eno1	sp|P17182|ENOA_MOUSE Alpha-enolase OS=Mus musculus OX=10090 GN=Eno1 PE=1 SV=3;tr|B0QZL1|B0QZL1_MOUSE 2-phospho-D-glycerate hydro-lyase (Fragment) OS=Mus musculus OX=10090 GN=Eno1 PE=1 SV=1;tr|Q6PHC1|Q6PHC1_MOUSE 2-phospho-D-glycerate hydro-lyase OS=Mus mus	15	4	4	4	0	0	0	0	0	0	2	3	0	2	0	0	0	1	3	0	0	0	0	0	0	0	0	0	0	0	0	0	0	0	2	3	0	2	0	0	0	1
Q80VP1;D3Z4V3;Q91W69;D3Z550	Q80VP1	17;2;1;1	17;2;1;1	17;2;1;1	Epsin-1	Epn1	sp|Q80VP1|EPN1_MOUSE Epsin-1 OS=Mus musculus OX=10090 GN=Epn1 PE=1 SV=3	4	17	17	17	0	0	0	0	0	0	12	10	13	0	0	0	0	10	9	12	0	0	0	0	0	0	0	0	0	0	0	0	0	0	12	10	13	0	0	0	0	10
Q6PH08;Q3UHT7	Q6PH08;Q3UHT7	1;1	1;1	1;1	ERC protein 2	Erc2	sp|Q6PH08|ERC2_MOUSE ERC protein 2 OS=Mus musculus OX=10090 GN=Erc2 PE=1 SV=2;tr|Q3UHT7|Q3UHT7_MOUSE ERC protein 2 OS=Mus musculus OX=10090 GN=Erc2 PE=1 SV=1	2	1	1	1	0	0	0	0	0	0	0	1	0	0	0	0	0	0	0	0	0	0	0	0	0	0	0	0	0	0	0	0	0	0	0	1	0	0	0	0	0	0
Q8C163	Q8C163	1	1	1	Nuclease EXOG, mitochondrial	Exog	sp|Q8C163|EXOG_MOUSE Nuclease EXOG, mitochondrial OS=Mus musculus OX=10090 GN=Exog PE=1 SV=1	1	1	1	1	0	0	0	0	0	0	1	0	0	0	0	0	0	1	0	0	0	0	0	0	0	0	0	0	0	0	0	0	0	0	1	0	0	0	0	0	0	1
Q6A0A9	Q6A0A9	1	1	1	Constitutive coactivator of PPAR-gamma-like protein 1	FAM120A	sp|Q6A0A9|F120A_MOUSE Constitutive coactivator of PPAR-gamma-like protein 1 OS=Mus musculus OX=10090 GN=FAM120A PE=1 SV=2	1	1	1	1	0	0	0	0	0	0	1	1	0	0	0	0	0	1	1	0	0	0	0	0	0	0	0	0	0	0	0	0	0	0	1	1	0	0	0	0	0	1
D3Z399;Q8CDU4	D3Z399;Q8CDU4	1;1	1;1	1;1	F-box/LRR-repeat protein 13	Fbxl13	tr|D3Z399|D3Z399_MOUSE Dynein regulatory complex subunit 6 OS=Mus musculus OX=10090 GN=Fbxl13 PE=4 SV=1;sp|Q8CDU4|DRC6_MOUSE Dynein regulatory complex subunit 6 OS=Mus musculus OX=10090 GN=Fbxl13 PE=1 SV=2	2	1	1	1	0	0	0	1	0	0	0	0	0	0	1	1	0	0	0	0	0	0	0	0	0	1	0	1	0	0	0	1	0	0	0	0	0	0	1	1	0	0
E9PV24	E9PV24	1	1	1	Fibrinogen alpha chain;Fibrinopeptide A;Fibrinogen alpha chain	Fga	sp|E9PV24|FIBA_MOUSE Fibrinogen alpha chain OS=Mus musculus OX=10090 GN=Fga PE=1 SV=1	1	1	1	1	0	0	0	0	0	0	0	0	1	0	0	0	0	0	0	0	0	0	0	0	0	0	0	0	0	0	0	0	0	0	0	0	1	0	0	0	0	0
B1AXV0;F6Q3S1	B1AXV0	3;1	3;1	3;1	DOMON domain-containing protein FRRS1L	Frrs1l	sp|B1AXV0|FRS1L_MOUSE DOMON domain-containing protein FRRS1L OS=Mus musculus OX=10090 GN=Frrs1l PE=1 SV=1	2	3	3	3	0	0	0	2	1	0	0	0	0	3	2	2	2	0	0	0	3	2	2	3	3	2	1	2	0	0	0	2	1	0	0	0	0	3	2	2	2	0
P56959;G3UXT7;Q8CFQ9;Q8BQ46;F6QCI0	P56959;G3UXT7;Q8CFQ9;Q8BQ46;F6QCI0	2;2;2;1;1	2;2;2;1;1	2;2;2;1;1	RNA-binding protein FUS	Fus;Taf15	sp|P56959|FUS_MOUSE RNA-binding protein FUS OS=Mus musculus OX=10090 GN=Fus PE=1 SV=1;tr|G3UXT7|G3UXT7_MOUSE RNA-binding protein FUS (Fragment) OS=Mus musculus OX=10090 GN=Fus PE=1 SV=1;tr|Q8CFQ9|Q8CFQ9_MOUSE Fusion, derived from t(1216) malignant liposarc	5	2	2	2	0	2	1	0	0	0	0	0	0	0	1	0	0	0	0	0	0	0	0	0	0	0	0	0	0	2	1	0	0	0	0	0	0	0	1	0	0	0
P50571	P50571	1	1	1	Gamma-aminobutyric acid receptor subunit beta-1	Gabrb1	sp|P50571|GBRB1_MOUSE Gamma-aminobutyric acid receptor subunit beta-1 OS=Mus musculus OX=10090 GN=Gabrb1 PE=1 SV=1	1	1	1	1	0	0	0	0	0	0	1	1	0	0	0	0	0	1	1	0	0	0	0	0	0	0	0	0	0	0	0	0	0	0	1	1	0	0	0	0	0	1
P16858;S4R1W1;A0A1D5RLD8;A0A0A0MQF6;S4R257;S4R1W8;S4R1N5;V9GX06	P16858;S4R1W1;A0A1D5RLD8;A0A0A0MQF6;S4R257	9;9;9;9;7;2;1;1	9;9;9;9;7;2;1;1	9;9;9;9;7;2;1;1	Glyceraldehyde-3-phosphate dehydrogenase	Gapdh;Gm3839	sp|P16858|G3P_MOUSE Glyceraldehyde-3-phosphate dehydrogenase OS=Mus musculus OX=10090 GN=Gapdh PE=1 SV=2;tr|S4R1W1|S4R1W1_MOUSE Glyceraldehyde-3-phosphate dehydrogenase OS=Mus musculus OX=10090 GN=Gm3839 PE=1 SV=1;tr|A0A1D5RLD8|A0A1D5RLD8_MOUSE Glyceraldeh	8	9	9	9	4	3	4	4	5	4	6	6	5	6	5	4	4	6	6	6	4	4	4	4	4	6	3	5	4	3	4	4	5	4	6	6	5	6	5	4	4	6
Q60780;B1ATI9;Q3U432;F6QB26	Q60780;B1ATI9;Q3U432;F6QB26	3;3;3;3	3;3;3;3	3;3;3;3	Growth arrest-specific protein 7	Gas7	sp|Q60780|GAS7_MOUSE Growth arrest-specific protein 7 OS=Mus musculus OX=10090 GN=Gas7 PE=1 SV=1;tr|B1ATI9|B1ATI9_MOUSE Growth arrest-specific protein 7 OS=Mus musculus OX=10090 GN=Gas7 PE=1 SV=1;tr|Q3U432|Q3U432_MOUSE Growth arrest-specific protein 7 OS=M	4	3	3	3	0	0	0	0	0	0	1	1	1	0	0	0	0	1	1	2	0	0	0	0	0	0	0	0	0	0	0	0	0	0	1	1	1	0	0	0	0	1
O55126;Q7TMG8	O55126;Q7TMG8	2;2	2;2	2;2	Protein NipSnap homolog 2	Gbas	sp|O55126|NIPS2_MOUSE Protein NipSnap homolog 2 OS=Mus musculus OX=10090 GN=Nipsnap2 PE=1 SV=1;tr|Q7TMG8|Q7TMG8_MOUSE Glioblastoma amplified sequence OS=Mus musculus OX=10090 GN=Nipsnap2 PE=1 SV=1	2	2	2	2	0	0	0	0	0	0	2	2	1	0	0	0	0	1	2	1	0	0	0	0	0	0	0	0	0	0	0	0	0	0	2	2	1	0	0	0	0	1
Q61598;A0A1Y7VLG4	Q61598;A0A1Y7VLG4	1;1	1;1	1;1	Rab GDP dissociation inhibitor beta	Gdi2	sp|Q61598|GDIB_MOUSE Rab GDP dissociation inhibitor beta OS=Mus musculus OX=10090 GN=Gdi2 PE=1 SV=1;tr|A0A1Y7VLG4|A0A1Y7VLG4_MOUSE Rab GDP dissociation inhibitor (Fragment) OS=Mus musculus OX=10090 GN=Gdi2 PE=1 SV=1	2	1	1	1	0	0	0	0	0	0	0	0	0	0	0	0	0	0	1	0	0	0	0	0	0	0	0	0	0	0	0	0	0	0	0	0	0	0	0	0	0	0
P03995	P03995	1	1	1	Glial fibrillary acidic protein	Gfap	sp|P03995|GFAP_MOUSE Glial fibrillary acidic protein OS=Mus musculus OX=10090 GN=Gfap PE=1 SV=4	1	1	1	1	0	0	1	0	0	0	0	0	0	0	0	0	0	0	0	0	0	0	0	0	0	0	0	0	0	0	1	0	0	0	0	0	0	0	0	0	0	0
P56213;A0A3Q4EGL6	P56213;A0A3Q4EGL6	1;1	1;1	1;1	FAD-linked sulfhydryl oxidase ALR	Gfer	sp|P56213|ALR_MOUSE FAD-linked sulfhydryl oxidase ALR OS=Mus musculus OX=10090 GN=Gfer PE=1 SV=2;tr|A0A3Q4EGL6|A0A3Q4EGL6_MOUSE Sulfhydryl oxidase OS=Mus musculus OX=10090 GN=Gfer PE=1 SV=1	2	1	1	1	0	0	0	0	0	0	1	1	0	0	0	0	0	1	1	0	0	0	0	0	0	0	0	0	0	0	0	0	0	0	1	1	0	0	0	0	0	1
P26443	P26443	1	1	1	Glutamate dehydrogenase 1, mitochondrial	Glud1	sp|P26443|DHE3_MOUSE Glutamate dehydrogenase 1, mitochondrial OS=Mus musculus OX=10090 GN=Glud1 PE=1 SV=1	1	1	1	1	0	0	0	0	0	0	1	0	0	0	0	0	0	0	1	0	0	0	0	0	0	0	0	0	0	0	0	0	0	0	1	0	0	0	0	0	0	0
P15105;D3YVK1	P15105;D3YVK1	5;3	5;3	5;3	Glutamine synthetase	Glul	sp|P15105|GLNA_MOUSE Glutamine synthetase OS=Mus musculus OX=10090 GN=Glul PE=1 SV=6;tr|D3YVK1|D3YVK1_MOUSE Glutamine synthetase (Fragment) OS=Mus musculus OX=10090 GN=Glul PE=1 SV=8	2	5	5	5	0	0	0	1	1	0	4	4	4	1	0	1	1	3	3	3	0	2	0	0	1	3	2	1	0	0	0	1	1	0	4	4	4	1	0	1	1	3
P18872;D3Z2M7;F7BLT7;B2RSH2;P08752;Q9DC51;Q8C040;A0A0A6YWA9;Q8BHK8;A2AE32;Q66L47;Z4YKV1;A2AE31;P63094;Q3V3I2;Q6R0H7;P50149;P20612;Q8CGK7;A2A610	P18872;D3Z2M7	8;7;3;2;2;2;1;1;1;1;1;1;1;1;1;1;1;1;1;1	8;7;3;2;2;2;1;1;1;1;1;1;1;1;1;1;1;1;1;1	8;7;3;2;2;2;1;1;1;1;1;1;1;1;1;1;1;1;1;1	Guanine nucleotide-binding protein G(o) subunit alpha	Gnao1	sp|P18872|GNAO_MOUSE Guanine nucleotide-binding protein G(o) subunit alpha OS=Mus musculus OX=10090 GN=Gnao1 PE=1 SV=3;tr|D3Z2M7|D3Z2M7_MOUSE Guanine nucleotide-binding protein G(o) subunit alpha (Fragment) OS=Mus musculus OX=10090 GN=Gnao1 PE=1 SV=1	20	8	8	8	1	1	1	4	2	1	3	4	3	5	3	2	2	4	4	3	5	4	2	4	4	3	4	2	1	1	1	4	2	1	3	4	3	5	3	2	2	4
P62874;H3BLF7;H3BKR2	P62874;H3BLF7;H3BKR2	3;3;3	3;3;3	1;1;1	Guanine nucleotide-binding protein G(I)/G(S)/G(T) subunit beta-1	Gnb1	sp|P62874|GBB1_MOUSE Guanine nucleotide-binding protein G(I)/G(S)/G(T) subunit beta-1 OS=Mus musculus OX=10090 GN=Gnb1 PE=1 SV=3;tr|H3BLF7|H3BLF7_MOUSE Guanine nucleotide-binding protein G(I)/G(S)/G(T) subunit beta-1 (Fragment) OS=Mus musculus OX=10090 GN=	3	3	3	1	0	1	2	0	1	0	2	2	2	2	2	1	0	2	2	2	3	3	1	3	3	3	1	1	0	1	2	0	1	0	2	2	2	2	2	1	0	2
P62880;P29387;D3Z1T4;D3Z1M1;D3YZX3;E9QKR0;Q61011;A0A0A6YVN9;V9GWY1	P62880;P29387;D3Z1T4;D3Z1M1;D3YZX3;E9QKR0	3;3;3;3;2;2;1;1;1	1;1;1;1;0;0;0;1;1	1;1;1;1;0;0;0;1;1	Guanine nucleotide-binding protein G(I)/G(S)/G(T) subunit beta-2;Guanine nucleotide-binding protein subunit beta-4	Gnb2;Gnb4	sp|P62880|GBB2_MOUSE Guanine nucleotide-binding protein G(I)/G(S)/G(T) subunit beta-2 OS=Mus musculus OX=10090 GN=Gnb2 PE=1 SV=3;sp|P29387|GBB4_MOUSE Guanine nucleotide-binding protein subunit beta-4 OS=Mus musculus OX=10090 GN=Gnb4 PE=1 SV=4;tr|D3Z1T4|D3Z	9	3	1	1	0	0	1	1	0	0	2	2	1	2	1	1	0	2	2	1	3	3	1	3	3	2	1	0	0	0	0	1	0	0	1	1	0	1	0	1	0	1
P05201;F7ALS6	P05201;F7ALS6	1;1	1;1	1;1	Aspartate aminotransferase, cytoplasmic	Got1	sp|P05201|AATC_MOUSE Aspartate aminotransferase, cytoplasmic OS=Mus musculus OX=10090 GN=Got1 PE=1 SV=3;tr|F7ALS6|F7ALS6_MOUSE Aspartate transaminase (Fragment) OS=Mus musculus OX=10090 GN=Got1 PE=1 SV=1	2	1	1	1	0	0	0	0	0	0	0	1	0	0	0	0	0	0	1	0	0	0	0	0	0	0	0	0	0	0	0	0	0	0	0	1	0	0	0	0	0	0
P05202	P05202	5	5	5	Aspartate aminotransferase, mitochondrial	Got2	sp|P05202|AATM_MOUSE Aspartate aminotransferase, mitochondrial OS=Mus musculus OX=10090 GN=Got2 PE=1 SV=1	1	5	5	5	0	0	0	0	0	0	0	4	0	1	0	0	0	2	5	0	0	0	0	0	0	0	0	0	0	0	0	0	0	0	0	4	0	1	0	0	0	2
Q64521;A2AQR0	Q64521;A2AQR0	3;3	3;3	3;3	Glycerol-3-phosphate dehydrogenase, mitochondrial;Glycerol-3-phosphate dehydrogenase	Gpd2	sp|Q64521|GPDM_MOUSE Glycerol-3-phosphate dehydrogenase, mitochondrial OS=Mus musculus OX=10090 GN=Gpd2 PE=1 SV=2;tr|A2AQR0|A2AQR0_MOUSE Glycerol-3-phosphate dehydrogenase OS=Mus musculus OX=10090 GN=Gpd2 PE=1 SV=1	2	3	3	3	0	0	0	2	0	1	0	0	0	2	0	0	1	0	1	0	1	0	1	1	0	0	0	2	0	0	0	2	0	1	0	0	0	2	0	0	1	0
Q8BUV3;A0JNY3	Q8BUV3;A0JNY3	8;8	8;8	8;8	Gephyrin;Molybdopterin adenylyltransferase;Molybdopterin molybdenumtransferase	Gphn	sp|Q8BUV3|GEPH_MOUSE Gephyrin OS=Mus musculus OX=10090 GN=Gphn PE=1 SV=2;tr|A0JNY3|A0JNY3_MOUSE Molybdopterin molybdenumtransferase OS=Mus musculus OX=10090 GN=Gphn PE=1 SV=1	2	8	8	8	0	0	0	0	0	0	4	4	6	0	0	0	0	3	2	3	0	0	0	0	0	0	0	0	0	0	0	0	0	0	4	4	6	0	0	0	0	3
P06745;CON__Q3ZBD7	P06745;CON__Q3ZBD7	1;1	1;1	1;1	Glucose-6-phosphate isomerase	Gpi	sp|P06745|G6PI_MOUSE Glucose-6-phosphate isomerase OS=Mus musculus OX=10090 GN=Gpi PE=1 SV=4;	2	1	1	1	0	0	0	0	0	0	0	1	0	0	0	0	0	0	1	0	0	0	0	0	0	0	0	0	0	0	0	0	0	0	0	1	0	0	0	0	0	0
P35802	P35802	1	1	1	Neuronal membrane glycoprotein M6-a	Gpm6a	sp|P35802|GPM6A_MOUSE Neuronal membrane glycoprotein M6-a OS=Mus musculus OX=10090 GN=Gpm6a PE=1 SV=1	1	1	1	1	0	0	0	0	0	0	1	1	0	0	0	0	0	1	1	0	0	0	0	0	0	0	0	0	0	0	0	0	0	0	1	1	0	0	0	0	0	1
P23818;F6YNQ1	P23818;F6YNQ1	38;37	1;1	1;1	Glutamate receptor 1	Gria1	sp|P23818|GRIA1_MOUSE Glutamate receptor 1 OS=Mus musculus OX=10090 GN=Gria1 PE=1 SV=1;tr|F6YNQ1|F6YNQ1_MOUSE Glutamate receptor OS=Mus musculus OX=10090 GN=Gria1 PE=1 SV=1	2	38	1	1	2	0	1	14	9	9	1	1	1	31	32	30	27	17	17	16	30	35	29	28	29	30	30	31	0	0	0	0	0	0	0	0	0	1	1	1	1	1
Q7TNB5	Q7TNB5	39	32	2		Gria1	tr|Q7TNB5|Q7TNB5_MOUSE Glutamate receptor OS=Mus musculus OX=10090 GN=Gria1 PE=1 SV=1	1	39	32	2	2	0	1	14	9	9	1	1	1	31	32	30	27	17	18	17	30	36	29	28	29	30	30	31	1	0	0	7	2	2	1	1	1	24	25	23	21	14
P23819	P23819	47	47	1	Glutamate receptor 2	Gria2	sp|P23819|GRIA2_MOUSE Glutamate receptor 2 OS=Mus musculus OX=10090 GN=Gria2 PE=1 SV=3	1	47	47	1	2	0	2	43	40	40	0	0	0	43	42	42	38	29	30	32	39	41	38	36	41	43	40	41	2	0	2	43	40	40	0	0	0	43	42	42	38	29
E9QKC0;A0A0A6YW90	E9QKC0;A0A0A6YW90	47;41	3;0	0;0		Gria2	tr|E9QKC0|E9QKC0_MOUSE Glutamate receptor OS=Mus musculus OX=10090 GN=Gria2 PE=1 SV=1;tr|A0A0A6YW90|A0A0A6YW90_MOUSE Glutamate receptor OS=Mus musculus OX=10090 GN=Gria2 PE=1 SV=1	2	47	3	0	2	0	2	43	40	40	0	0	0	43	42	42	38	29	29	31	39	41	38	36	41	43	40	41	0	0	0	3	3	3	0	0	0	3	3	3	3	2
G5E8H1	G5E8H1	47	1	0		Gria2	tr|G5E8H1|G5E8H1_MOUSE Glutamate receptor OS=Mus musculus OX=10090 GN=Gria2 PE=1 SV=1	1	47	1	0	2	0	2	43	40	40	0	0	0	43	42	42	38	29	30	32	39	41	38	36	41	43	40	41	0	0	0	1	1	1	0	0	0	1	1	1	1	1
Q9Z2W9	Q9Z2W9	31	2	2	Glutamate receptor 3	Gria3	sp|Q9Z2W9|GRIA3_MOUSE Glutamate receptor 3 OS=Mus musculus OX=10090 GN=Gria3 PE=1 SV=2	1	31	2	2	1	0	1	28	30	28	0	0	2	5	5	6	4	19	18	17	18	19	16	16	27	26	27	30	0	0	0	2	2	2	0	0	0	0	0	0	0	1
B0QZW1;F2Z488;B0QZW2	B0QZW1;F2Z488	31;27;1	24;20;1	0;0;0		Gria3	tr|B0QZW1|B0QZW1_MOUSE Glutamate receptor OS=Mus musculus OX=10090 GN=Gria3 PE=1 SV=1;tr|F2Z488|F2Z488_MOUSE Glutamate receptor OS=Mus musculus OX=10090 GN=Gria3 PE=1 SV=1	3	31	24	0	1	0	1	28	30	28	0	0	2	7	7	8	6	19	18	17	18	19	16	17	27	26	27	30	0	0	1	21	23	21	0	0	1	0	0	1	0	14
G5E863;E9PX01	G5E863	19;5	9;5	0;0		Gria4	tr|G5E863|G5E863_MOUSE Glutamate receptor OS=Mus musculus OX=10090 GN=Gria4 PE=1 SV=1	2	19	9	0	1	0	0	18	16	14	0	0	1	12	14	15	10	9	8	6	11	11	8	9	11	12	10	14	0	0	0	8	6	5	0	0	0	3	5	6	3	2
P51855;A2AQN9	P51855;A2AQN9	1;1	1;1	1;1	Glutathione synthetase	Gss	sp|P51855|GSHB_MOUSE Glutathione synthetase OS=Mus musculus OX=10090 GN=Gss PE=1 SV=1;tr|A2AQN9|A2AQN9_MOUSE Glutathione synthetase (Fragment) OS=Mus musculus OX=10090 GN=Gss PE=1 SV=1	2	1	1	1	1	0	0	0	0	0	1	1	1	1	0	0	0	1	1	1	1	1	0	1	1	1	0	0	1	0	0	0	0	0	1	1	1	1	0	0	0	1
P10649;A2AE89;F6WHQ7;Q80W21;P15626;D3YVP6;E9QAC8;D3YX76;D3YVP5;P19639;Q8R5I6;D3YZ29;A2AE91;O35660;G5E8M7;D3YVP9;D3YVP8	P10649;A2AE89;F6WHQ7	11;11;6;3;3;3;3;3;3;2;2;2;2;1;1;1;1	11;11;6;3;3;3;3;3;3;2;2;2;2;1;1;1;1	10;10;5;2;2;2;2;2;2;2;1;1;1;1;1;1;1	Glutathione S-transferase Mu 1	Gstm1	sp|P10649|GSTM1_MOUSE Glutathione S-transferase Mu 1 OS=Mus musculus OX=10090 GN=Gstm1 PE=1 SV=2;tr|A2AE89|A2AE89_MOUSE Glutathione transferase OS=Mus musculus OX=10090 GN=Gstm1 PE=1 SV=2;tr|F6WHQ7|F6WHQ7_MOUSE Glutathione S-transferase Mu 1 (Fragment) OS=	17	11	11	10	4	10	9	2	8	7	0	0	0	7	11	4	4	0	0	0	9	9	6	10	8	11	5	7	4	10	9	2	8	7	0	0	0	7	11	4	4	0
P48774;E9PVM7;E9PV63;E9Q5L9;E9Q024	P48774;E9PVM7;E9PV63	6;5;3;2;2	5;4;2;2;2	5;4;2;2;2	Glutathione S-transferase Mu 5	Gstm5	sp|P48774|GSTM5_MOUSE Glutathione S-transferase Mu 5 OS=Mus musculus OX=10090 GN=Gstm5 PE=1 SV=1;tr|E9PVM7|E9PVM7_MOUSE Glutathione S-transferase (Fragment) OS=Mus musculus OX=10090 GN=Gstm5 PE=1 SV=1;tr|E9PV63|E9PV63_MOUSE Glutathione transferase OS=Mus m	5	6	5	5	4	5	3	2	1	0	1	0	0	4	6	1	1	0	1	0	4	4	2	5	3	2	1	1	4	4	3	2	1	0	1	0	0	4	5	1	1	0
P19157;A0A494BAW2;A0A494B908;P46425;A0A494BAS3;A0A494BAU3;A0A494BAM8;Q8VC73;F6RWR5	P19157;A0A494BAW2;A0A494B908;P46425	9;8;7;5;3;3;2;1;1	9;8;7;5;3;3;2;1;1	9;8;7;5;3;3;2;1;1	Glutathione S-transferase P 1;Glutathione S-transferase P 2	Gstp1;Gstp2	sp|P19157|GSTP1_MOUSE Glutathione S-transferase P 1 OS=Mus musculus OX=10090 GN=Gstp1 PE=1 SV=2;tr|A0A494BAW2|A0A494BAW2_MOUSE GST class-pi OS=Mus musculus OX=10090 GN=Gstp1 PE=1 SV=1;tr|A0A494B908|A0A494B908_MOUSE GST class-pi (Fragment) OS=Mus musculus O	9	9	9	9	8	7	8	7	7	8	7	7	7	7	8	7	7	7	7	7	7	6	7	8	8	8	6	7	8	7	8	7	7	8	7	7	7	7	8	7	7	7
Q8K2C9	Q8K2C9	2	2	2	Very-long-chain (3R)-3-hydroxyacyl-CoA dehydratase 3	Hacd3	sp|Q8K2C9|HACD3_MOUSE Very-long-chain (3R)-3-hydroxyacyl-CoA dehydratase 3 OS=Mus musculus OX=10090 GN=Hacd3 PE=1 SV=2	1	2	2	2	0	0	0	0	0	0	2	2	0	0	0	0	0	2	2	0	0	0	0	0	0	0	0	0	0	0	0	0	0	0	2	2	0	0	0	0	0	2
Q8BMS1	Q8BMS1	1	1	1	Trifunctional enzyme subunit alpha, mitochondrial;Long-chain enoyl-CoA hydratase;Long chain 3-hydroxyacyl-CoA dehydrogenase	Hadha	sp|Q8BMS1|ECHA_MOUSE Trifunctional enzyme subunit alpha, mitochondrial OS=Mus musculus OX=10090 GN=Hadha PE=1 SV=1	1	1	1	1	0	0	0	0	0	0	1	1	0	0	0	0	0	1	1	0	0	0	0	0	0	0	0	0	0	0	0	0	0	0	1	1	0	0	0	0	0	1
A8DUK4;P02088;E9Q223;P02089;P02104;CON__P02070;CON__Q3SX09	A8DUK4;P02088;E9Q223;P02089	4;3;3;2;1;1;1	4;3;3;2;1;1;1	4;3;3;2;1;1;1	Hemoglobin subunit beta-1;Hemoglobin subunit beta-2	Hbbt1;Hbb-b1;Hbb-bs;Hbb-b2	tr|A8DUK4|A8DUK4_MOUSE Beta-globin OS=Mus musculus OX=10090 GN=Hbb-bs PE=1 SV=1;sp|P02088|HBB1_MOUSE Hemoglobin subunit beta-1 OS=Mus musculus OX=10090 GN=Hbb-b1 PE=1 SV=2;tr|E9Q223|E9Q223_MOUSE Hemoglobin, beta adult s chain (Fragment) OS=Mus musculus OX=	7	4	4	4	1	0	0	0	0	0	1	1	0	2	0	0	0	1	2	0	1	0	0	2	1	0	0	0	1	0	0	0	0	0	1	1	0	2	0	0	0	1
Q6ZWY9;Q64478;P10853;P10854;Q64475;Q64525;Q9D2U9;Q8CGP2;Q8CGP1;Q8CGP0;Q64524;Q8CBB6	Q6ZWY9;Q64478;P10853;P10854;Q64475;Q64525;Q9D2U9;Q8CGP2;Q8CGP1;Q8CGP0;Q64524;Q8CBB6	1;1;1;1;1;1;1;1;1;1;1;1	1;1;1;1;1;1;1;1;1;1;1;1	1;1;1;1;1;1;1;1;1;1;1;1	Histone H2B type 1-C/E/G;Histone H2B type 1-H;Histone H2B type 1-F/J/L;Histone H2B type 1-M;Histone H2B type 1-B;Histone H2B type 2-B;Histone H2B type 3-A;Histone H2B type 1-P;Histone H2B type 1-K;Histone H2B type 3-B;Histone H2B type 2-E;Histone H2B	Hist1h2bc;Hist1h2bh;Hist1h2bf;Hist1h2bm;Hist1h2bb;Hist2h2bb;Hist3h2ba;Hist1h2bp;Hist1h2bk;Hist3h2bb;Hist2h2be;Hist1h2br	sp|Q6ZWY9|H2B1C_MOUSE Histone H2B type 1-C/E/G OS=Mus musculus OX=10090 GN=H2bc4 PE=1 SV=3;sp|Q64478|H2B1H_MOUSE Histone H2B type 1-H OS=Mus musculus OX=10090 GN=H2bc9 PE=1 SV=3;sp|P10853|H2B1F_MOUSE Histone H2B type 1-F/J/L OS=Mus musculus OX=10090 GN=H2b	12	1	1	1	0	0	0	0	0	0	0	0	0	0	0	0	0	0	1	0	0	0	0	0	0	0	0	0	0	0	0	0	0	0	0	0	0	0	0	0	0	0
P17710;G3UVV4	P17710;G3UVV4	1;1	1;1	1;1	Hexokinase-1;Hexokinase	Hk1	sp|P17710|HXK1_MOUSE Hexokinase-1 OS=Mus musculus OX=10090 GN=Hk1 PE=1 SV=3;tr|G3UVV4|G3UVV4_MOUSE Hexokinase OS=Mus musculus OX=10090 GN=Hk1 PE=1 SV=1	2	1	1	1	0	0	0	0	0	0	0	0	0	1	0	0	0	0	0	0	0	0	0	0	0	0	0	0	0	0	0	0	0	0	0	0	0	1	0	0	0	0
O88569;A0A0N4SUM2	O88569;A0A0N4SUM2	1;1	1;1	1;1	Heterogeneous nuclear ribonucleoproteins A2/B1	Hnrnpa2b1	sp|O88569|ROA2_MOUSE Heterogeneous nuclear ribonucleoproteins A2/B1 OS=Mus musculus OX=10090 GN=Hnrnpa2b1 PE=1 SV=2;tr|A0A0N4SUM2|A0A0N4SUM2_MOUSE Heterogeneous nuclear ribonucleoproteins A2/B1 (Fragment) OS=Mus musculus OX=10090 GN=Hnrnpa2b1 PE=1 SV=1	2	1	1	1	1	1	1	1	1	1	0	0	1	1	1	1	0	0	0	1	0	1	0	1	1	1	1	1	1	1	1	1	1	1	0	0	1	1	1	1	0	0
Q8BG05;A2AL12;A2AL13	Q8BG05;A2AL12	3;3;1	3;3;1	3;3;1	Heterogeneous nuclear ribonucleoprotein A3	Hnrnpa3	sp|Q8BG05|ROA3_MOUSE Heterogeneous nuclear ribonucleoprotein A3 OS=Mus musculus OX=10090 GN=Hnrnpa3 PE=1 SV=1;tr|A2AL12|A2AL12_MOUSE Heterogeneous nuclear ribonucleoprotein A3 OS=Mus musculus OX=10090 GN=Hnrnpa3 PE=1 SV=1	3	3	3	3	0	0	0	0	0	0	0	0	3	0	0	0	0	0	0	3	0	0	0	0	0	0	0	0	0	0	0	0	0	0	0	0	3	0	0	0	0	0
Q9Z204	Q9Z204	1	1	1	Heterogeneous nuclear ribonucleoproteins C1/C2	Hnrnpc	sp|Q9Z204|HNRPC_MOUSE Heterogeneous nuclear ribonucleoproteins C1/C2 OS=Mus musculus OX=10090 GN=Hnrnpc PE=1 SV=1	1	1	1	1	0	0	0	0	0	0	0	0	1	0	0	0	0	0	0	1	0	0	0	0	0	0	0	0	0	0	0	0	0	0	0	0	1	0	0	0	0	0
Q60668;E9Q5B6;F6ZV59;G5E8G0;G3X9W0;Q9Z130;Q9D3U4;D3YTQ3;F6SHF3;F6VQH5	Q60668;E9Q5B6;F6ZV59;G5E8G0;G3X9W0;Q9Z130;Q9D3U4;D3YTQ3;F6SHF3;F6VQH5	2;2;2;2;2;1;1;1;1;1	2;2;2;2;2;1;1;1;1;1	2;2;2;2;2;1;1;1;1;1	Heterogeneous nuclear ribonucleoprotein D0;Heterogeneous nuclear ribonucleoprotein D-like	Hnrnpd;Hnrnpdl;Rbm31y	sp|Q60668|HNRPD_MOUSE Heterogeneous nuclear ribonucleoprotein D0 OS=Mus musculus OX=10090 GN=Hnrnpd PE=1 SV=2;tr|E9Q5B6|E9Q5B6_MOUSE Heterogeneous nuclear ribonucleoprotein D0 (Fragment) OS=Mus musculus OX=10090 GN=Hnrnpd PE=1 SV=1;tr|F6ZV59|F6ZV59_MOUSE H	10	2	2	2	1	1	1	0	1	0	1	1	0	1	1	0	1	1	0	1	1	0	0	0	1	0	0	0	1	1	1	0	1	0	1	1	0	1	1	0	1	1
P70333;O35737;Q8C2Q7	P70333;O35737;Q8C2Q7	1;1;1	1;1;1	1;1;1	Heterogeneous nuclear ribonucleoprotein H2;Heterogeneous nuclear ribonucleoprotein H;Heterogeneous nuclear ribonucleoprotein H, N-terminally processed	Hnrnph2;Hnrnph1	sp|P70333|HNRH2_MOUSE Heterogeneous nuclear ribonucleoprotein H2 OS=Mus musculus OX=10090 GN=Hnrnph2 PE=1 SV=1;sp|O35737|HNRH1_MOUSE Heterogeneous nuclear ribonucleoprotein H OS=Mus musculus OX=10090 GN=Hnrnph1 PE=1 SV=3;tr|Q8C2Q7|Q8C2Q7_MOUSE Heterogeneou	3	1	1	1	0	0	0	0	0	0	1	0	0	0	0	0	0	0	0	1	0	0	0	0	0	0	0	0	0	0	0	0	0	0	1	0	0	0	0	0	0	0
Q8VEK3	Q8VEK3	2	2	2	Heterogeneous nuclear ribonucleoprotein U	Hnrnpu	sp|Q8VEK3|HNRPU_MOUSE Heterogeneous nuclear ribonucleoprotein U OS=Mus musculus OX=10090 GN=Hnrnpu PE=1 SV=1	1	2	2	2	0	0	0	0	0	0	0	0	2	0	0	0	0	0	0	1	0	0	0	0	0	0	0	0	0	0	0	0	0	0	0	0	2	0	0	0	0	0
P11499;P07901;E9Q3D6	P11499;P07901;E9Q3D6	1;1;1	1;1;1	1;1;1	Heat shock protein HSP 90-beta;Heat shock protein HSP 90-alpha	Hsp90ab1;Hsp90aa1	sp|P11499|HS90B_MOUSE Heat shock protein HSP 90-beta OS=Mus musculus OX=10090 GN=Hsp90ab1 PE=1 SV=3;sp|P07901|HS90A_MOUSE Heat shock protein HSP 90-alpha OS=Mus musculus OX=10090 GN=Hsp90aa1 PE=1 SV=4;tr|E9Q3D6|E9Q3D6_MOUSE Heat shock protein HSP 90-beta (	3	1	1	1	0	0	0	0	0	0	0	1	0	0	0	0	0	0	1	0	0	0	0	0	0	0	0	0	0	0	0	0	0	0	0	1	0	0	0	0	0	0
P20029	P20029	15	13	13	78 kDa glucose-regulated protein	Hspa5	sp|P20029|BIP_MOUSE Endoplasmic reticulum chaperone BiP OS=Mus musculus OX=10090 GN=Hspa5 PE=1 SV=3	1	15	13	13	1	2	0	14	9	13	1	1	4	2	5	9	3	2	2	3	3	1	0	3	4	6	5	10	0	1	0	12	8	11	0	0	2	1	3	7	1	1
P63017;Q504P4;P17156;D3Z5E2;Q61696;P16627;P17879	P63017;Q504P4	19;18;8;5;3;3;3	19;18;8;5;3;3;3	17;16;6;4;2;1;2	Heat shock cognate 71 kDa protein	Hspa8	sp|P63017|HSP7C_MOUSE Heat shock cognate 71 kDa protein OS=Mus musculus OX=10090 GN=Hspa8 PE=1 SV=1;tr|Q504P4|Q504P4_MOUSE Heat shock cognate 71 kDa protein OS=Mus musculus OX=10090 GN=Hspa8 PE=1 SV=1	7	19	19	17	1	2	4	4	2	3	12	9	15	4	3	2	3	10	11	15	3	2	2	1	2	2	1	4	1	2	4	4	2	3	12	9	15	4	3	2	3	10
P38647	P38647	10	10	10	Stress-70 protein, mitochondrial	Hspa9	sp|P38647|GRP75_MOUSE Stress-70 protein, mitochondrial OS=Mus musculus OX=10090 GN=Hspa9 PE=1 SV=3	1	10	10	10	2	4	3	3	1	1	2	3	4	0	0	3	0	2	3	2	0	0	0	3	0	1	0	3	2	4	3	3	1	1	2	3	4	0	0	3	0	2
P63038;D3Z7J9;D3Z2F2	P63038	3;1;1	3;1;1	3;1;1	60 kDa heat shock protein, mitochondrial	Hspd1	sp|P63038|CH60_MOUSE 60 kDa heat shock protein, mitochondrial OS=Mus musculus OX=10090 GN=Hspd1 PE=1 SV=1	3	3	3	3	0	0	1	2	0	1	1	1	0	2	0	0	0	1	1	1	0	1	0	0	0	1	0	1	0	0	1	2	0	1	1	1	0	2	0	0	0	1
Q9D6R2;A0A1L1STE6	Q9D6R2;A0A1L1STE6	2;2	2;2	2;2	Isocitrate dehydrogenase [NAD] subunit alpha, mitochondrial	Idh3a	sp|Q9D6R2|IDH3A_MOUSE Isocitrate dehydrogenase [NAD] subunit alpha, mitochondrial OS=Mus musculus OX=10090 GN=Idh3a PE=1 SV=1;tr|A0A1L1STE6|A0A1L1STE6_MOUSE Isocitrate dehydrogenase [NAD] subunit, mitochondrial OS=Mus musculus OX=10090 GN=Idh3a PE=1 SV=1	2	2	2	2	0	0	0	0	0	0	1	2	0	0	0	0	0	2	2	0	0	0	0	0	0	0	0	0	0	0	0	0	0	0	1	2	0	0	0	0	0	2
Q91VA7;A0A668KL51;V9GXV0	Q91VA7;A0A668KL51	3;3;1	3;3;1	3;3;1	Isocitrate dehydrogenase [NAD] subunit, mitochondrial	Idh3b	tr|Q91VA7|Q91VA7_MOUSE Isocitrate dehydrogenase [NAD] subunit, mitochondrial OS=Mus musculus OX=10090 GN=Idh3b PE=1 SV=1;tr|A0A668KL51|A0A668KL51_MOUSE Isocitrate dehydrogenase [NAD] subunit, mitochondrial OS=Mus musculus OX=10090 GN=Idh3b PE=1 SV=1	3	3	3	3	0	0	0	1	0	0	0	1	1	1	0	0	0	0	0	1	0	0	0	0	0	0	0	1	0	0	0	1	0	0	0	1	1	1	0	0	0	0
P70404	P70404	1	1	1	Isocitrate dehydrogenase [NAD] subunit gamma 1, mitochondrial	Idh3g	sp|P70404|IDHG1_MOUSE Isocitrate dehydrogenase [NAD] subunit gamma 1, mitochondrial OS=Mus musculus OX=10090 GN=Idh3g PE=1 SV=1	1	1	1	1	0	0	0	0	0	0	0	0	1	0	0	0	0	1	1	0	0	0	0	0	0	0	0	0	0	0	0	0	0	0	0	0	1	0	0	0	0	1
P01863;P01865	P01863;P01865	3;3	2;2	2;2	Ig gamma-2A chain C region, A allele;Ig gamma-2A chain C region, membrane-bound form	Ighg;Igh-1a	sp|P01863|GCAA_MOUSE Ig gamma-2A chain C region, A allele OS=Mus musculus OX=10090 GN=Ighg PE=1 SV=1;sp|P01865|GCAM_MOUSE Ig gamma-2A chain C region, membrane-bound form OS=Mus musculus OX=10090 GN=Igh-1a PE=1 SV=3	2	3	2	2	2	2	2	1	1	1	0	0	0	1	1	0	1	0	0	0	0	1	0	0	0	0	0	0	2	2	2	1	1	1	0	0	0	0	0	0	0	0
A0A075B5P4;A0A0A6YWR2;P01868;P01869	A0A075B5P4;A0A0A6YWR2;P01868;P01869	2;2;1;1	2;2;1;1	2;2;1;1	Ig gamma-1 chain C region secreted form;Ig gamma-1 chain C region, membrane-bound form	Ighg1	tr|A0A075B5P4|A0A075B5P4_MOUSE Ig gamma-1 chain C region secreted form (Fragment) OS=Mus musculus OX=10090 GN=Ighg1 PE=1 SV=1;tr|A0A0A6YWR2|A0A0A6YWR2_MOUSE Ig gamma-1 chain C region secreted form (Fragment) OS=Mus musculus OX=10090 GN=Ighg1 PE=1 SV=1;sp|P	4	2	2	2	2	2	2	0	1	1	2	2	2	0	2	1	1	2	2	2	2	0	2	2	1	0	1	2	2	2	2	0	1	1	2	2	2	0	2	1	1	2
A0A075B5P3;A0A0A6YVP0;P01867	A0A075B5P3;A0A0A6YVP0;P01867	4;4;2	4;4;2	3;3;2	Ig gamma-2B chain C region	Ighg2b;Igh-3	tr|A0A075B5P3|A0A075B5P3_MOUSE Immunoglobulin heavy constant gamma 2B (Fragment) OS=Mus musculus OX=10090 GN=Ighg2b PE=1 SV=1;tr|A0A0A6YVP0|A0A0A6YVP0_MOUSE Immunoglobulin heavy constant gamma 2B (Fragment) OS=Mus musculus OX=10090 GN=Ighg2b PE=1 SV=2;sp|P	3	4	4	3	1	1	1	1	0	1	0	0	1	3	2	1	4	0	0	1	2	2	1	1	1	1	1	1	1	1	1	1	0	1	0	0	1	3	2	1	4	0
F6TQW2;A0A0A6YY53;P01864	F6TQW2;A0A0A6YY53;P01864	3;3;3	2;2;2	2;2;2	Ig gamma-2A chain C region secreted form	Ighg2c	tr|F6TQW2|F6TQW2_MOUSE Immunoglobulin heavy constant gamma 2C (Fragment) OS=Mus musculus OX=10090 GN=Ighg2c PE=1 SV=2;tr|A0A0A6YY53|A0A0A6YY53_MOUSE Immunoglobulin heavy constant gamma 2C (Fragment) OS=Mus musculus OX=10090 GN=Ighg2c PE=1 SV=1;sp|P01864|GC	3	3	2	2	1	2	1	0	0	1	2	2	2	3	3	2	3	2	2	2	2	3	2	1	0	1	2	0	1	2	1	0	0	1	2	2	2	2	2	2	2	2
A0A075B5P5;A0A1Y7VJN6;P03987	A0A075B5P5;A0A1Y7VJN6;P03987	4;4;4	4;4;4	4;4;4	Ig gamma-3 chain C region	Ighg3	tr|A0A075B5P5|A0A075B5P5_MOUSE Immunoglobulin heavy constant gamma 3 (Fragment) OS=Mus musculus OX=10090 GN=Ighg3 PE=4 SV=1;tr|A0A1Y7VJN6|A0A1Y7VJN6_MOUSE Immunoglobulin heavy constant gamma 3 (Fragment) OS=Mus musculus OX=10090 GN=Ighg3 PE=4 SV=1;sp|P0398	3	4	4	4	2	2	2	1	0	0	0	0	1	1	1	0	1	0	0	1	2	0	0	2	0	0	0	0	2	2	2	1	0	0	0	0	1	1	1	0	1	0
A0A075B6A0;A0A075B5P6;P01872	A0A075B6A0;A0A075B5P6;P01872	4;4;4	4;4;4	4;4;4	Ig mu chain C region	Ighm	tr|A0A075B6A0|A0A075B6A0_MOUSE Immunoglobulin heavy constant mu (Fragment) OS=Mus musculus OX=10090 GN=Ighm PE=1 SV=2;tr|A0A075B5P6|A0A075B5P6_MOUSE Immunoglobulin heavy constant mu (Fragment) OS=Mus musculus OX=10090 GN=Ighm PE=1 SV=1;sp|P01872|IGHM_MOUSE	3	4	4	4	0	1	1	0	0	0	0	0	3	0	0	0	0	0	0	3	0	0	0	0	0	0	0	0	0	1	1	0	0	0	0	0	3	0	0	0	0	0
A0A075B5V6;A0A075B5V1;P01757;P01756;P06330	A0A075B5V6;A0A075B5V1;P01757;P01756;P06330	1;1;1;1;1	1;1;1;1;1	1;1;1;1;1	Ig heavy chain V region J558;Ig heavy chain V region MOPC 104E;Ig heavy chain V region AC38 205.12	Ighv1-42;Ighv1-31	tr|A0A075B5V6|A0A075B5V6_MOUSE Immunoglobulin heavy variable V1-42 OS=Mus musculus OX=10090 GN=Ighv1-42 PE=1 SV=1;tr|A0A075B5V1|A0A075B5V1_MOUSE Immunoglobulin heavy variable 1-31 OS=Mus musculus OX=10090 GN=Ighv1-31 PE=4 SV=1;sp|P01757|HVM13_MOUSE Ig heav	5	1	1	1	1	1	1	1	0	1	1	1	1	1	1	1	1	1	1	1	1	1	1	1	1	1	1	1	1	1	1	1	0	1	1	1	1	1	1	1	1	1
A0A075B5Q9;A0A0A6YWC7;A0A075B5Q4;P18525	A0A075B5Q9;A0A0A6YWC7;A0A075B5Q4;P18525	1;1;1;1	1;1;1;1	1;1;1;1	Ig heavy chain V region 5-84	Ighv5-15;Ighv5-12	tr|A0A075B5Q9|A0A075B5Q9_MOUSE Immunoglobulin heavy variable 5-15 OS=Mus musculus OX=10090 GN=Ighv5-15 PE=4 SV=1;tr|A0A0A6YWC7|A0A0A6YWC7_MOUSE Immunoglobulin heavy variable 5-15 (Fragment) OS=Mus musculus OX=10090 GN=Ighv5-15 PE=4 SV=1;tr|A0A075B5Q4|A0A07	4	1	1	1	0	0	0	0	0	0	0	0	0	0	1	0	0	0	0	0	0	0	0	1	0	0	0	0	0	0	0	0	0	0	0	0	0	0	1	0	0	0
A0A075B5S2	A0A075B5S2	1	1	1		Ighv7-1	tr|A0A075B5S2|A0A075B5S2_MOUSE Immunoglobulin heavy variable 7-1 (Fragment) OS=Mus musculus OX=10090 GN=Ighv7-1 PE=1 SV=2	1	1	1	1	0	0	0	0	0	0	0	0	1	0	0	0	0	0	0	0	0	0	0	0	0	0	0	0	0	0	0	0	0	0	0	0	1	0	0	0	0	0
A0A140T8M9;A0A140T8M0;A0A0B4J1I0;A0A075B5N0;A0A075B5K8;F6XWB2;A0A140T8N1;A0A0G2JDE5;P01631	A0A140T8M9;A0A140T8M0;A0A0B4J1I0;A0A075B5N0;A0A075B5K8;F6XWB2;A0A140T8N1;A0A0G2JDE5;P01631	1;1;1;1;1;1;1;1;1	1;1;1;1;1;1;1;1;1	1;1;1;1;1;1;1;1;1	Ig kappa chain V-II region 26-10	Igkv1-110;Igkv1-35;Igkv1-99;Igkv1-115	tr|A0A140T8M9|A0A140T8M9_MOUSE Immunoglobulin kappa chain variable 1-122 (Fragment) OS=Mus musculus OX=10090 GN=Igkv1-122 PE=4 SV=2;tr|A0A140T8M0|A0A140T8M0_MOUSE Immunoglobulin kappa variable 1-117 (Fragment) OS=Mus musculus OX=10090 GN=Igkv1-117 PE=4 SV=	9	1	1	1	0	1	0	0	0	0	0	0	1	1	1	0	1	0	0	1	1	1	0	0	1	1	0	0	0	1	0	0	0	0	0	0	1	1	1	0	1	0
A0A0B4J1I9;A0A0B4J1I4;A0A0A6YYE7;P04945	A0A0B4J1I9;A0A0B4J1I4;A0A0A6YYE7;P04945	2;1;1;1	2;1;1;1	2;1;1;1	Ig kappa chain V-VI region NQ2-6.1	Igkv4-55;Igkv4-72;Igkv4-57	tr|A0A0B4J1I9|A0A0B4J1I9_MOUSE Immunoglobulin kappa variable 4-55 (Fragment) OS=Mus musculus OX=10090 GN=Igkv4-55 PE=1 SV=1;tr|A0A0B4J1I4|A0A0B4J1I4_MOUSE Immunoglobulin kappa chain variable 4-72 (Fragment) OS=Mus musculus OX=10090 GN=Igkv4-72 PE=4 SV=1;tr	4	2	2	2	0	0	0	0	0	0	0	0	1	1	0	1	0	0	0	1	0	0	1	0	0	0	0	0	0	0	0	0	0	0	0	0	1	1	0	1	0	0
A0A075B5M7	A0A075B5M7	1	1	1		Igkv5-39	tr|A0A075B5M7|A0A075B5M7_MOUSE Immunoglobulin kappa variable 5-39 OS=Mus musculus OX=10090 GN=Igkv5-39 PE=1 SV=7	1	1	1	1	0	0	0	0	0	0	0	0	1	0	0	0	0	0	0	1	0	0	0	0	0	0	0	0	0	0	0	0	0	0	0	0	1	0	0	0	0	0
A0A075B5N4	A0A075B5N4	1	1	1		Igkv8-27	tr|A0A075B5N4|A0A075B5N4_MOUSE Immunoglobulin kappa chain variable 8-27 OS=Mus musculus OX=10090 GN=Igkv8-27 PE=4 SV=1	1	1	1	1	0	0	0	0	0	0	0	1	1	0	0	0	0	1	1	0	0	0	0	0	0	0	0	0	0	0	0	0	0	0	0	1	1	0	0	0	0	1
Q8CAQ8;E9Q800;A0A0U1RQ14;E9QAY6;A0A0U1RP81	Q8CAQ8;E9Q800;A0A0U1RQ14;E9QAY6	4;4;3;3;1	4;4;3;3;1	4;4;3;3;1	MICOS complex subunit Mic60	Immt	sp|Q8CAQ8|MIC60_MOUSE MICOS complex subunit Mic60 OS=Mus musculus OX=10090 GN=Immt PE=1 SV=1;tr|E9Q800|E9Q800_MOUSE MICOS complex subunit MIC60 OS=Mus musculus OX=10090 GN=Immt PE=1 SV=1;tr|A0A0U1RQ14|A0A0U1RQ14_MOUSE MICOS complex subunit MIC60 (Fragment)	5	4	4	4	0	0	0	0	0	0	0	0	3	0	0	0	0	0	0	1	0	0	0	0	0	0	0	0	0	0	0	0	0	0	0	0	3	0	0	0	0	0
P46660	P46660	1	1	1	Alpha-internexin	Ina	sp|P46660|AINX_MOUSE Alpha-internexin OS=Mus musculus OX=10090 GN=Ina PE=1 SV=3	1	1	1	1	0	0	0	0	0	0	0	0	1	0	0	0	0	0	0	1	0	0	0	0	0	0	0	0	0	0	0	0	0	0	0	0	1	0	0	0	0	0
Q91VK4;A0A087WRM2	Q91VK4;A0A087WRM2	5;5	5;5	5;5	Integral membrane protein 2C;CT-BRI3	Itm2c	sp|Q91VK4|ITM2C_MOUSE Integral membrane protein 2C OS=Mus musculus OX=10090 GN=Itm2c PE=1 SV=2;tr|A0A087WRM2|A0A087WRM2_MOUSE Integral membrane protein 2 OS=Mus musculus OX=10090 GN=Itm2c PE=1 SV=1	2	5	5	5	0	0	0	0	0	0	5	4	2	0	0	0	0	5	5	2	0	0	0	0	0	0	0	0	0	0	0	0	0	0	5	4	2	0	0	0	0	5
Q9Z0R4;E9Q3I8;E9Q3I9;E9Q3I4;E9Q3I5;CON__ENSEMBL:ENSBTAP00000001528;E9Q0N0	Q9Z0R4;E9Q3I8;E9Q3I9;E9Q3I4;E9Q3I5;CON__ENSEMBL:ENSBTAP00000001528;E9Q0N0	1;1;1;1;1;1;1	1;1;1;1;1;1;1	1;1;1;1;1;1;1	Intersectin-1	Itsn1	sp|Q9Z0R4|ITSN1_MOUSE Intersectin-1 OS=Mus musculus OX=10090 GN=Itsn1 PE=1 SV=2;tr|E9Q3I8|E9Q3I8_MOUSE Intersectin-1 OS=Mus musculus OX=10090 GN=Itsn1 PE=1 SV=1;tr|E9Q3I9|E9Q3I9_MOUSE Intersectin-1 OS=Mus musculus OX=10090 GN=Itsn1 PE=1 SV=1;tr|E9Q3I4|E9Q3	7	1	1	1	0	0	0	0	0	0	0	0	1	0	0	0	0	0	0	0	0	0	0	0	0	0	0	0	0	0	0	0	0	0	0	0	1	0	0	0	0	0
Q6TDP3	Q6TDP3	1	1	1	Kelch-like protein 17	Klhl17	sp|Q6TDP3|KLH17_MOUSE Kelch-like protein 17 OS=Mus musculus OX=10090 GN=Klhl17 PE=1 SV=1	1	1	1	1	0	0	0	0	0	0	0	0	0	1	0	0	0	0	0	0	0	0	0	1	0	0	0	0	0	0	0	0	0	0	0	0	0	1	0	0	0	0
CON__Q04695;Q9QWL7;CON__Q9QWL7	CON__Q04695;Q9QWL7;CON__Q9QWL7	17;15;15	9;7;7	7;5;5	Keratin, type I cytoskeletal 17	Krt17	;sp|Q9QWL7|K1C17_MOUSE Keratin, type I cytoskeletal 17 OS=Mus musculus OX=10090 GN=Krt17 PE=1 SV=3;	3	17	9	7	2	4	1	1	0	0	1	1	4	14	1	2	0	1	1	4	2	4	5	2	1	1	1	0	0	0	0	0	0	0	0	0	0	9	0	0	0	0
Q6IME9;CON__Q14CN4-1;CON__Q6IME9;CON__Q3SY84;CON__Q7RTS7;CON__Q32MB2	Q6IME9;CON__Q14CN4-1;CON__Q6IME9;CON__Q3SY84;CON__Q7RTS7;CON__Q32MB2	5;5;5;3;3;3	1;1;1;1;1;1	1;1;1;1;1;1	Keratin, type II cytoskeletal 72	Krt72	sp|Q6IME9|K2C72_MOUSE Keratin, type II cytoskeletal 72 OS=Mus musculus OX=10090 GN=Krt72 PE=3 SV=1;;;;;	6	5	1	1	0	2	0	0	0	0	1	0	0	3	2	0	0	0	0	1	0	2	1	1	0	1	0	0	0	0	0	0	0	0	1	0	0	0	0	0	0	0
Q3UV17;P07744;Q99M73;CON__P07744;Q9DCV7;CON__Q9DCV7;CON__Q3KNV1;CON__P08729;CON__Q9NSB2;CON__Q6ISB0;CON__REFSEQ:XP_932229	Q3UV17;P07744;Q99M73;CON__P07744	5;3;3;3;2;2;2;2;2;2;1	1;0;0;0;0;0;0;0;0;0;0	1;0;0;0;0;0;0;0;0;0;0	Keratin, type II cytoskeletal 2 oral;Keratin, type II cytoskeletal 4;Keratin, type II cuticular Hb4	Krt76;Krt4;Krt84	sp|Q3UV17|K22O_MOUSE Keratin, type II cytoskeletal 2 oral OS=Mus musculus OX=10090 GN=Krt76 PE=1 SV=1;sp|P07744|K2C4_MOUSE Keratin, type II cytoskeletal 4 OS=Mus musculus OX=10090 GN=Krt4 PE=1 SV=2;sp|Q99M73|KRT84_MOUSE Keratin, type II cuticular Hb4 OS=Mu	11	5	1	1	1	4	1	1	1	1	0	0	1	4	3	1	1	0	0	1	1	3	2	2	0	2	1	1	1	1	1	1	1	1	0	0	1	1	1	1	1	0
P06151;A0A1B0GRW9;A0A1B0GSL7;A0A1B0GT41;A0A1B0GQX5;A0A1B0GS79;D3YZQ9;A0A1B0GSR9;A0A1B0GSX0	P06151;A0A1B0GRW9;A0A1B0GSL7;A0A1B0GT41;A0A1B0GQX5;A0A1B0GS79;D3YZQ9;A0A1B0GSR9;A0A1B0GSX0	1;1;1;1;1;1;1;1;1	1;1;1;1;1;1;1;1;1	1;1;1;1;1;1;1;1;1	L-lactate dehydrogenase A chain;L-lactate dehydrogenase	Ldha	sp|P06151|LDHA_MOUSE L-lactate dehydrogenase A chain OS=Mus musculus OX=10090 GN=Ldha PE=1 SV=3;tr|A0A1B0GRW9|A0A1B0GRW9_MOUSE L-lactate dehydrogenase A chain (Fragment) OS=Mus musculus OX=10090 GN=Ldha PE=1 SV=1;tr|A0A1B0GSL7|A0A1B0GSL7_MOUSE L-lactate de	9	1	1	1	0	0	0	0	0	0	1	1	0	0	0	0	0	0	1	0	0	0	0	0	0	0	0	0	0	0	0	0	0	0	1	1	0	0	0	0	0	0
Q9JIA1;A0A0G2JGE8;A0A0G2JGB7	Q9JIA1;A0A0G2JGE8;A0A0G2JGB7	1;1;1	1;1;1	1;1;1	Leucine-rich glioma-inactivated protein 1	Lgi1	sp|Q9JIA1|LGI1_MOUSE Leucine-rich glioma-inactivated protein 1 OS=Mus musculus OX=10090 GN=Lgi1 PE=1 SV=1;tr|A0A0G2JGE8|A0A0G2JGE8_MOUSE Leucine-rich glioma-inactivated protein 1 OS=Mus musculus OX=10090 GN=Lgi1 PE=1 SV=1;tr|A0A0G2JGB7|A0A0G2JGB7_MOUSE Leu	3	1	1	1	0	0	0	0	0	0	1	1	0	0	0	0	0	1	1	0	0	0	0	0	0	0	0	0	0	0	0	0	0	0	1	1	0	0	0	0	0	1
Q3U3R4;F6YC79;Z4YJR1	Q3U3R4;F6YC79;Z4YJR1	1;1;1	1;1;1	1;1;1	Lipase maturation factor 1;Lipase maturation factor	Lmf1	sp|Q3U3R4|LMF1_MOUSE Lipase maturation factor 1 OS=Mus musculus OX=10090 GN=Lmf1 PE=1 SV=1;tr|F6YC79|F6YC79_MOUSE Lipase maturation factor OS=Mus musculus OX=10090 GN=Lmf1 PE=1 SV=2;tr|Z4YJR1|Z4YJR1_MOUSE Lipase maturation factor OS=Mus musculus OX=10090 G	3	1	1	1	0	0	0	0	0	0	0	1	0	0	0	0	0	0	0	0	0	0	0	0	0	0	0	0	0	0	0	0	0	0	0	1	0	0	0	0	0	0
Q7TQ95;A2ASM0;A2ASL8	Q7TQ95;A2ASM0;A2ASL8	1;1;1	1;1;1	1;1;1	Protein lunapark	Lnp	sp|Q7TQ95|LNP_MOUSE Endoplasmic reticulum junction formation protein lunapark OS=Mus musculus OX=10090 GN=Lnpk PE=1 SV=1;tr|A2ASM0|A2ASM0_MOUSE Endoplasmic reticulum junction formation protein lunapark (Fragment) OS=Mus musculus OX=10090 GN=Lnpk PE=1 SV=8;	3	1	1	1	0	0	0	0	0	0	1	0	0	0	0	0	0	1	1	0	0	0	0	0	0	0	0	0	0	0	0	0	0	0	1	0	0	0	0	0	0	1
P20357;A0A668KLC6;Q3TLQ0;Q80X35;Q80ZL4;G3UZJ2;G3UWW1;G3UZV6;G3UZE9;G3UZK9	P20357;A0A668KLC6	5;5;2;2;2;1;1;1;1;1	5;5;2;2;2;1;1;1;1;1	5;5;2;2;2;1;1;1;1;1	Microtubule-associated protein 2	Map2	sp|P20357|MTAP2_MOUSE Microtubule-associated protein 2 OS=Mus musculus OX=10090 GN=Map2 PE=1 SV=2;tr|A0A668KLC6|A0A668KLC6_MOUSE Microtubule-associated protein OS=Mus musculus OX=10090 GN=Map2 PE=1 SV=1	10	5	5	5	0	0	0	0	0	0	1	2	1	0	0	0	0	2	4	0	0	0	0	0	0	0	0	0	0	0	0	0	0	0	1	2	1	0	0	0	0	2
Q7TSJ2;A0A140LIT9;D3Z6W1	Q7TSJ2;A0A140LIT9;D3Z6W1	16;12;9	16;12;9	16;12;9	Microtubule-associated protein 6	Map6	sp|Q7TSJ2|MAP6_MOUSE Microtubule-associated protein 6 OS=Mus musculus OX=10090 GN=Map6 PE=1 SV=2;tr|A0A140LIT9|A0A140LIT9_MOUSE Microtubule-associated protein 6 OS=Mus musculus OX=10090 GN=Map6 PE=1 SV=1;tr|D3Z6W1|D3Z6W1_MOUSE Microtubule-associated protei	3	16	16	16	0	0	0	0	0	0	4	4	11	0	0	0	0	1	2	4	0	0	0	0	0	0	1	0	0	0	0	0	0	0	4	4	11	0	0	0	0	1
B1AQW2;B1AQW4	B1AQW2;B1AQW4	1;1	1;1	1;1	Microtubule-associated protein	Mapt	tr|B1AQW2|B1AQW2_MOUSE Microtubule-associated protein OS=Mus musculus OX=10090 GN=Mapt PE=1 SV=1;tr|B1AQW4|B1AQW4_MOUSE Microtubule-associated protein tau (Fragment) OS=Mus musculus OX=10090 GN=Mapt PE=1 SV=1	2	1	1	1	0	0	0	0	0	0	1	1	0	0	0	0	0	1	1	0	0	0	0	0	0	0	0	0	0	0	0	0	0	0	1	1	0	0	0	0	0	1
Q05512;E9QMP6;F6ZS70;Q3T9A3;A0A0R4J0B1;A0A0R4J227;E9PYX3;E9Q9N6;F6ZEX4;F7A3Q3;F6UY70;E9Q2J6;F7CVZ7;F7CRG8;Q03141;F6Z4Q6;A0A0A6YY78;E9Q8H5;E9Q2G8;A0A1Y7VNZ6;Q8CIP4;Q8VHJ5;E9PZ55	Q05512;E9QMP6;F6ZS70;Q3T9A3;A0A0R4J0B1;A0A0R4J227;E9PYX3;E9Q9N6	10;10;10;10;10;10;10;10;4;4;3;3;2;2;1;1;1;1;1;1;1;1;1	10;10;10;10;10;10;10;10;4;4;3;3;2;2;1;1;1;1;1;1;1;1;1	10;10;10;10;10;10;10;10;4;4;3;3;2;2;1;1;1;1;1;1;1;1;1	Serine/threonine-protein kinase MARK2	Mark2	sp|Q05512|MARK2_MOUSE Serine/threonine-protein kinase MARK2 OS=Mus musculus OX=10090 GN=Mark2 PE=1 SV=3;tr|E9QMP6|E9QMP6_MOUSE Non-specific serine/threonine protein kinase OS=Mus musculus OX=10090 GN=Mark2 PE=1 SV=2;tr|F6ZS70|F6ZS70_MOUSE Non-specific seri	23	10	10	10	0	0	0	0	0	0	5	1	7	0	0	0	0	4	1	5	0	0	0	0	0	0	0	0	0	0	0	0	0	0	5	1	7	0	0	0	0	4
P04370;A0A498WGS3	P04370;A0A498WGS3	5;5	5;5	5;5	Myelin basic protein	Mbp	sp|P04370|MBP_MOUSE Myelin basic protein OS=Mus musculus OX=10090 GN=Mbp PE=1 SV=2;tr|A0A498WGS3|A0A498WGS3_MOUSE Myelin basic protein OS=Mus musculus OX=10090 GN=Mbp PE=1 SV=1	2	5	5	5	5	5	5	5	5	4	4	5	5	5	5	5	4	4	5	5	5	5	5	5	5	5	5	3	5	5	5	5	5	4	4	5	5	5	5	5	4	4
P14152;A0A5F8MPN8	P14152;A0A5F8MPN8	1;1	1;1	1;1	Malate dehydrogenase, cytoplasmic	Mdh1	sp|P14152|MDHC_MOUSE Malate dehydrogenase, cytoplasmic OS=Mus musculus OX=10090 GN=Mdh1 PE=1 SV=3;tr|A0A5F8MPN8|A0A5F8MPN8_MOUSE Malate dehydrogenase OS=Mus musculus OX=10090 GN=Mdh1 PE=1 SV=1	2	1	1	1	0	0	0	0	0	0	0	1	0	0	0	0	0	0	1	0	0	0	0	0	0	0	0	0	0	0	0	0	0	0	0	1	0	0	0	0	0	0
P08249;A0A0G2JGY4;A0A0G2JF23	P08249	9;3;3	9;3;3	9;3;3	Malate dehydrogenase, mitochondrial	Mdh2	sp|P08249|MDHM_MOUSE Malate dehydrogenase, mitochondrial OS=Mus musculus OX=10090 GN=Mdh2 PE=1 SV=3	3	9	9	9	1	0	1	1	0	0	2	8	0	6	0	0	0	0	8	0	2	0	0	0	0	0	0	0	1	0	1	1	0	0	2	8	0	6	0	0	0	0
Q9CPU4	Q9CPU4	1	1	1	Microsomal glutathione S-transferase 3	Mgst3	sp|Q9CPU4|MGST3_MOUSE Microsomal glutathione S-transferase 3 OS=Mus musculus OX=10090 GN=Mgst3 PE=1 SV=1	1	1	1	1	0	0	0	0	0	0	1	1	1	0	0	0	0	1	1	1	0	0	0	0	0	0	0	0	0	0	0	0	0	0	1	1	1	0	0	0	0	1
Q8BML1	Q8BML1	1	1	1	Protein-methionine sulfoxide oxidase MICAL2	Mical2	sp|Q8BML1|MICA2_MOUSE [F-actin]-monooxygenase MICAL2 OS=Mus musculus OX=10090 GN=Mical2 PE=1 SV=1	1	1	1	1	0	0	0	0	0	1	0	1	0	0	0	0	0	0	0	0	0	0	0	0	0	0	0	0	0	0	0	0	0	1	0	1	0	0	0	0	0	0
Q3UY21;Q61885	Q3UY21;Q61885	1;1	1;1	1;1	Myelin-oligodendrocyte glycoprotein	Mog	tr|Q3UY21|Q3UY21_MOUSE Myelin-oligodendrocyte glycoprotein OS=Mus musculus OX=10090 GN=Mog PE=1 SV=1;sp|Q61885|MOG_MOUSE Myelin-oligodendrocyte glycoprotein OS=Mus musculus OX=10090 GN=Mog PE=1 SV=1	2	1	1	1	0	0	0	0	0	0	0	0	0	1	0	1	1	0	0	0	0	0	0	0	0	0	0	1	0	0	0	0	0	0	0	0	0	1	0	1	1	0
P03930	P03930	1	1	1	ATP synthase protein 8	Mtatp8	sp|P03930|ATP8_MOUSE ATP synthase protein 8 OS=Mus musculus OX=10090 GN=Mtatp8 PE=1 SV=1	1	1	1	1	0	0	0	0	0	0	0	0	0	1	0	0	0	0	0	0	0	0	0	0	0	0	0	0	0	0	0	0	0	0	0	0	0	1	0	0	0	0
P00405	P00405	3	3	3	Cytochrome c oxidase subunit 2	Mtco2	sp|P00405|COX2_MOUSE Cytochrome c oxidase subunit 2 OS=Mus musculus OX=10090 GN=Mtco2 PE=1 SV=1	1	3	3	3	0	1	1	1	0	0	1	2	0	2	1	0	0	2	2	0	1	0	0	0	1	1	0	0	0	1	1	1	0	0	1	2	0	2	1	0	0	2
Q6PGB6	Q6PGB6	9	9	9	N-alpha-acetyltransferase 50	Naa50	sp|Q6PGB6|NAA50_MOUSE N-alpha-acetyltransferase 50 OS=Mus musculus OX=10090 GN=Naa50 PE=1 SV=1	1	9	9	9	7	7	7	5	4	6	2	2	6	5	6	3	4	2	2	6	7	7	6	7	6	5	4	4	7	7	7	5	4	6	2	2	6	5	6	3	4	2
P28663;Q9DB05	P28663;Q9DB05	1;1	1;1	1;1	Beta-soluble NSF attachment protein;Alpha-soluble NSF attachment protein	Napb;Napa	sp|P28663|SNAB_MOUSE Beta-soluble NSF attachment protein OS=Mus musculus OX=10090 GN=Napb PE=1 SV=2;sp|Q9DB05|SNAA_MOUSE Alpha-soluble NSF attachment protein OS=Mus musculus OX=10090 GN=Napa PE=1 SV=1	2	1	1	1	0	0	0	0	0	0	0	1	0	0	0	0	0	0	1	0	0	0	0	0	0	0	0	0	0	0	0	0	0	0	0	1	0	0	0	0	0	0
P13595;A0A0A6YWU2;E9Q589;A0A0A6YY47;E9QB01;A0A0A6YY91	P13595;A0A0A6YWU2;E9Q589;A0A0A6YY47;E9QB01;A0A0A6YY91	2;2;2;2;2;2	2;2;2;2;2;2	2;2;2;2;2;2	Neural cell adhesion molecule 1	Ncam1	sp|P13595|NCAM1_MOUSE Neural cell adhesion molecule 1 OS=Mus musculus OX=10090 GN=Ncam1 PE=1 SV=3;tr|A0A0A6YWU2|A0A0A6YWU2_MOUSE Neural cell adhesion molecule 1 OS=Mus musculus OX=10090 GN=Ncam1 PE=1 SV=1;tr|E9Q589|E9Q589_MOUSE Neural cell adhesion molecul	6	2	2	2	0	0	0	0	0	0	0	0	0	0	0	0	0	0	2	0	0	0	0	0	0	0	0	0	0	0	0	0	0	0	0	0	0	0	0	0	0	0
P28660;A2AS98	P28660;A2AS98	2;2	2;2	2;2	Nck-associated protein 1	Nckap1	sp|P28660|NCKP1_MOUSE Nck-associated protein 1 OS=Mus musculus OX=10090 GN=Nckap1 PE=1 SV=2;tr|A2AS98|A2AS98_MOUSE Nck-associated protein 1 OS=Mus musculus OX=10090 GN=Nckap1 PE=1 SV=1	2	2	2	2	0	0	0	0	0	0	0	0	1	0	0	0	0	1	0	0	0	0	0	0	0	0	0	0	0	0	0	0	0	0	0	0	1	0	0	0	0	1
Q99LC3	Q99LC3	1	1	1	NADH dehydrogenase [ubiquinone] 1 alpha subcomplex subunit 10, mitochondrial	Ndufa10	sp|Q99LC3|NDUAA_MOUSE NADH dehydrogenase [ubiquinone] 1 alpha subcomplex subunit 10, mitochondrial OS=Mus musculus OX=10090 GN=Ndufa10 PE=1 SV=1	1	1	1	1	0	0	0	0	0	0	0	0	0	1	0	0	0	0	0	0	0	0	0	0	0	0	0	0	0	0	0	0	0	0	0	0	0	1	0	0	0	0
Q62425;A0A0N4SVQ1	Q62425;A0A0N4SVQ1	2;2	2;2	2;2	Cytochrome c oxidase subunit NDUFA4	Ndufa4	sp|Q62425|NDUA4_MOUSE Cytochrome c oxidase subunit NDUFA4 OS=Mus musculus OX=10090 GN=Ndufa4 PE=1 SV=2;tr|A0A0N4SVQ1|A0A0N4SVQ1_MOUSE Cytochrome c oxidase subunit NDUFA4 OS=Mus musculus OX=10090 GN=Ndufa4 PE=1 SV=1	2	2	2	2	2	0	1	2	0	0	1	1	1	2	2	1	0	1	1	1	2	1	0	0	2	0	1	1	2	0	1	2	0	0	1	1	1	2	2	1	0	1
Q9DCJ5	Q9DCJ5	1	1	1	NADH dehydrogenase [ubiquinone] 1 alpha subcomplex subunit 8	Ndufa8	sp|Q9DCJ5|NDUA8_MOUSE NADH dehydrogenase [ubiquinone] 1 alpha subcomplex subunit 8 OS=Mus musculus OX=10090 GN=Ndufa8 PE=1 SV=3	1	1	1	1	0	0	0	0	0	0	1	1	0	0	0	0	0	1	1	0	0	0	0	0	0	0	0	0	0	0	0	0	0	0	1	1	0	0	0	0	0	1
Q8K3J1;A0A494BAW8	Q8K3J1;A0A494BAW8	1;1	1;1	1;1	NADH dehydrogenase [ubiquinone] iron-sulfur protein 8, mitochondrial	Ndufs8	sp|Q8K3J1|NDUS8_MOUSE NADH dehydrogenase [ubiquinone] iron-sulfur protein 8, mitochondrial OS=Mus musculus OX=10090 GN=Ndufs8 PE=1 SV=1;tr|A0A494BAW8|A0A494BAW8_MOUSE NADH dehydrogenase [ubiquinone] iron-sulfur protein 8, mitochondrial (Fragment) OS=Mus mu	2	1	1	1	0	0	0	0	0	0	0	0	0	0	0	0	0	0	1	0	0	0	0	0	0	0	0	0	0	0	0	0	0	0	0	0	0	0	0	0	0	0
O55125	O55125	1	1	1	Protein NipSnap homolog 1	Nipsnap1	sp|O55125|NIPS1_MOUSE Protein NipSnap homolog 1 OS=Mus musculus OX=10090 GN=Nipsnap1 PE=1 SV=1	1	1	1	1	0	0	0	0	0	0	0	0	1	0	0	0	0	0	0	1	0	0	0	0	0	0	0	0	0	0	0	0	0	0	0	0	1	0	0	0	0	0
Q99K48;B1AXT0	Q99K48	9;2	8;2	8;2	Non-POU domain-containing octamer-binding protein	Nono	sp|Q99K48|NONO_MOUSE Non-POU domain-containing octamer-binding protein OS=Mus musculus OX=10090 GN=Nono PE=1 SV=3	2	9	8	8	0	0	0	0	0	0	3	1	6	0	0	0	0	3	4	8	0	0	0	0	0	0	0	0	0	0	0	0	0	0	3	1	6	0	0	0	0	3
P46460;G3UX86;G3UX98	P46460	16;5;1	16;5;1	16;5;1	Vesicle-fusing ATPase	Nsf	sp|P46460|NSF_MOUSE Vesicle-fusing ATPase OS=Mus musculus OX=10090 GN=Nsf PE=1 SV=2	3	16	16	16	0	0	2	2	1	5	7	7	11	0	1	1	0	4	3	9	1	1	0	0	1	1	0	1	0	0	2	2	1	5	7	7	11	0	1	1	0	4
P54729;A0A0G2JGQ4	P54729;A0A0G2JGQ4	1;1	1;1	1;1	NEDD8 ultimate buster 1	Nub1	sp|P54729|NUB1_MOUSE NEDD8 ultimate buster 1 OS=Mus musculus OX=10090 GN=Nub1 PE=1 SV=2;tr|A0A0G2JGQ4|A0A0G2JGQ4_MOUSE NEDD8 ultimate buster 1 OS=Mus musculus OX=10090 GN=Nub1 PE=1 SV=1	2	1	1	1	0	0	0	0	0	0	1	0	0	0	0	0	0	0	0	0	0	0	0	1	0	0	0	0	0	0	0	0	0	0	1	0	0	0	0	0	0	0
O08919	O08919	3	3	3	Numb-like protein	Numbl	sp|O08919|NUMBL_MOUSE Numb-like protein OS=Mus musculus OX=10090 GN=Numbl PE=1 SV=3	1	3	3	3	0	0	0	0	0	0	0	1	3	0	0	0	0	0	0	0	0	0	0	0	0	0	0	0	0	0	0	0	0	0	0	1	3	0	0	0	0	0
Q9D8W7;A0A0J9YU93	Q9D8W7;A0A0J9YU93	1;1	1;1	1;1	OCIA domain-containing protein 2	Ociad2	sp|Q9D8W7|OCAD2_MOUSE OCIA domain-containing protein 2 OS=Mus musculus OX=10090 GN=Ociad2 PE=1 SV=1;tr|A0A0J9YU93|A0A0J9YU93_MOUSE OCIA domain-containing protein 2 OS=Mus musculus OX=10090 GN=Ociad2 PE=1 SV=1	2	1	1	1	0	0	0	0	0	0	0	0	0	1	0	0	0	0	0	0	0	0	0	0	0	0	0	0	0	0	0	0	0	0	0	0	0	1	0	0	0	0
Q60597;Z4YJV4	Q60597;Z4YJV4	3;3	3;3	3;3	2-oxoglutarate dehydrogenase, mitochondrial	Ogdh	sp|Q60597|ODO1_MOUSE 2-oxoglutarate dehydrogenase, mitochondrial OS=Mus musculus OX=10090 GN=Ogdh PE=1 SV=3;tr|Z4YJV4|Z4YJV4_MOUSE 2-oxoglutarate dehydrogenase, mitochondrial OS=Mus musculus OX=10090 GN=Ogdh PE=1 SV=1	2	3	3	3	0	0	0	0	0	0	0	0	2	0	1	0	0	0	1	1	0	0	0	0	0	0	0	0	0	0	0	0	0	0	0	0	2	0	1	0	0	0
Q8R357;O88998;A3KGE4;G3X9Q7	Q8R357;O88998;A3KGE4;G3X9Q7	5;5;4;4	5;5;4;4	5;5;4;4	Noelin	Olfm1	tr|Q8R357|Q8R357_MOUSE Noelin OS=Mus musculus OX=10090 GN=Olfm1 PE=1 SV=1;sp|O88998|NOE1_MOUSE Noelin OS=Mus musculus OX=10090 GN=Olfm1 PE=1 SV=1;tr|A3KGE4|A3KGE4_MOUSE Noelin OS=Mus musculus OX=10090 GN=Olfm1 PE=1 SV=1;tr|G3X9Q7|G3X9Q7_MOUSE Noelin OS=Mus	4	5	5	5	0	0	0	2	2	3	0	0	0	1	1	2	2	0	1	1	2	1	0	1	4	1	1	3	0	0	0	2	2	3	0	0	0	1	1	2	2	0
D3YTM3;P63056	D3YTM3;P63056	1;1	1;1	1;1	Noelin-3	Olfm3	tr|D3YTM3|D3YTM3_MOUSE Noelin-3 (Fragment) OS=Mus musculus OX=10090 GN=Olfm3 PE=1 SV=1;sp|P63056|NOE3_MOUSE Noelin-3 OS=Mus musculus OX=10090 GN=Olfm3 PE=1 SV=1	2	1	1	1	0	0	0	0	0	1	0	0	0	0	0	0	0	0	0	0	0	0	0	0	0	0	0	0	0	0	0	0	0	1	0	0	0	0	0	0	0	0
Q9D0K2;Q3UJQ9	Q9D0K2;Q3UJQ9	1;1	1;1	1;1	Succinyl-CoA:3-ketoacid coenzyme A transferase 1, mitochondrial;Succinyl-CoA:3-ketoacid-coenzyme A transferase	Oxct1	sp|Q9D0K2|SCOT1_MOUSE Succinyl-CoA:3-ketoacid coenzyme A transferase 1, mitochondrial OS=Mus musculus OX=10090 GN=Oxct1 PE=1 SV=1;tr|Q3UJQ9|Q3UJQ9_MOUSE Succinyl-CoA:3-ketoacid-coenzyme A transferase OS=Mus musculus OX=10090 GN=Oxct1 PE=1 SV=1	2	1	1	1	0	0	0	0	0	0	0	0	0	0	0	0	0	0	1	0	0	0	0	0	0	0	0	0	0	0	0	0	0	0	0	0	0	0	0	0	0	0
P29341;Q9D4E6;A0A2I3BR37;Q62029;F6ZAX1;Q8C7D3	P29341;Q9D4E6	11;7;4;3;2;1	11;7;4;3;2;1	9;7;3;3;1;1	Polyadenylate-binding protein 1;Polyadenylate-binding protein	Pabpc1;Pabpc6	sp|P29341|PABP1_MOUSE Polyadenylate-binding protein 1 OS=Mus musculus OX=10090 GN=Pabpc1 PE=1 SV=2;tr|Q9D4E6|Q9D4E6_MOUSE Polyadenylate-binding protein OS=Mus musculus OX=10090 GN=Pabpc6 PE=1 SV=1	6	11	11	9	0	0	0	0	0	0	10	7	8	0	0	0	0	5	5	3	0	0	0	0	0	0	0	0	0	0	0	0	0	0	10	7	8	0	0	0	0	5
Q6PHQ9;Q91YZ8;A3KFU5;A3KFU8;V9GXG3	Q6PHQ9;Q91YZ8;A3KFU5;A3KFU8	5;5;5;5;2	3;3;3;3;1	3;3;3;3;1	Polyadenylate-binding protein	Pabpc4	tr|Q6PHQ9|Q6PHQ9_MOUSE Polyadenylate-binding protein OS=Mus musculus OX=10090 GN=Pabpc4 PE=1 SV=1;tr|Q91YZ8|Q91YZ8_MOUSE Polyadenylate-binding protein OS=Mus musculus OX=10090 GN=Pabpc4 PE=1 SV=1;tr|A3KFU5|A3KFU5_MOUSE Polyadenylate-binding protein OS=Mus	5	5	3	3	0	0	0	0	0	0	4	4	2	0	0	0	0	2	1	1	0	0	0	0	0	0	0	0	0	0	0	0	0	0	2	2	1	0	0	0	0	0
Q61644;A0A384DVB1	Q61644;A0A384DVB1	1;1	1;1	1;1	Protein kinase C and casein kinase substrate in neurons protein 1	Pacsin1	sp|Q61644|PACN1_MOUSE Protein kinase C and casein kinase substrate in neurons protein 1 OS=Mus musculus OX=10090 GN=Pacsin1 PE=1 SV=1;tr|A0A384DVB1|A0A384DVB1_MOUSE Protein kinase C and casein kinase substrate in neurons protein 1 (Fragment) OS=Mus musculu	2	1	1	1	0	0	0	0	0	0	1	0	0	0	0	0	0	1	1	0	0	0	0	0	0	0	0	0	0	0	0	0	0	0	1	0	0	0	0	0	0	1
O88643	O88643	1	1	1	Serine/threonine-protein kinase PAK 1	Pak1	sp|O88643|PAK1_MOUSE Serine/threonine-protein kinase PAK 1 OS=Mus musculus OX=10090 GN=Pak1 PE=1 SV=1	1	1	1	1	1	1	1	1	1	1	0	0	0	1	1	1	1	0	0	0	1	1	1	1	1	1	1	1	1	1	1	1	1	1	0	0	0	1	1	1	1	0
Q8CEG0;D6RDS8	Q8CEG0;D6RDS8	1;1	1;1	1;1	Pannexin-3	Panx3	sp|Q8CEG0|PANX3_MOUSE Pannexin-3 OS=Mus musculus OX=10090 GN=Panx3 PE=1 SV=1;tr|D6RDS8|D6RDS8_MOUSE Pannexin-3 OS=Mus musculus OX=10090 GN=Panx3 PE=4 SV=1	2	1	1	1	0	0	0	0	0	0	0	0	0	1	0	0	0	0	0	0	0	0	0	0	0	0	0	0	0	0	0	0	0	0	0	0	0	1	0	0	0	0
Q8CFX3;F7BJK1	Q8CFX3;F7BJK1	1;1	1;1	1;1		Pcdh1	tr|Q8CFX3|Q8CFX3_MOUSE Protocadherin 1 OS=Mus musculus OX=10090 GN=Pcdh1 PE=1 SV=1;tr|F7BJK1|F7BJK1_MOUSE Protocadherin 1 (Fragment) OS=Mus musculus OX=10090 GN=Pcdh1 PE=1 SV=1	2	1	1	1	0	0	0	0	0	0	0	0	1	0	0	0	0	0	0	0	0	0	0	0	0	0	0	0	0	0	0	0	0	0	0	0	1	0	0	0	0	0
P23506;F6V9F1;F7D432;E9PWE0;E0CYV0	P23506;F6V9F1;F7D432;E9PWE0;E0CYV0	1;1;1;1;1	1;1;1;1;1	1;1;1;1;1	Protein-L-isoaspartate(D-aspartate) O-methyltransferase;Protein-L-isoaspartate O-methyltransferase	Pcmt1	sp|P23506|PIMT_MOUSE Protein-L-isoaspartate(D-aspartate) O-methyltransferase OS=Mus musculus OX=10090 GN=Pcmt1 PE=1 SV=3;tr|F6V9F1|F6V9F1_MOUSE Protein-L-isoaspartate(D-aspartate) O-methyltransferase (Fragment) OS=Mus musculus OX=10090 GN=Pcmt1 PE=1 SV=1;t	5	1	1	1	0	0	0	0	0	0	1	1	0	0	0	0	0	1	1	0	0	0	0	0	0	0	0	0	0	0	0	0	0	0	1	1	0	0	0	0	0	1
Q9D051	Q9D051	4	4	4	Pyruvate dehydrogenase E1 component subunit beta, mitochondrial	Pdhb	sp|Q9D051|ODPB_MOUSE Pyruvate dehydrogenase E1 component subunit beta, mitochondrial OS=Mus musculus OX=10090 GN=Pdhb PE=1 SV=1	1	4	4	4	0	0	0	0	1	0	1	2	1	1	0	0	0	1	2	1	0	0	0	0	0	0	0	0	0	0	0	0	1	0	1	2	1	1	0	0	0	1
Q8CI51;D9J2Z9;D9J300;D9J301;D9J302;Q9CRA2;A0A0G2JGZ5;D9J303;F8WJI6;E9Q8P5;A0A0G2JEJ0	Q8CI51;D9J2Z9;D9J300;D9J301;D9J302;Q9CRA2;A0A0G2JGZ5;D9J303;F8WJI6;E9Q8P5;A0A0G2JEJ0	2;2;2;2;2;1;1;1;1;1;1	2;2;2;2;2;1;1;1;1;1;1	2;2;2;2;2;1;1;1;1;1;1	PDZ and LIM domain protein 5	Pdlim5	sp|Q8CI51|PDLI5_MOUSE PDZ and LIM domain protein 5 OS=Mus musculus OX=10090 GN=Pdlim5 PE=1 SV=4;tr|D9J2Z9|D9J2Z9_MOUSE ENH isoform 1b OS=Mus musculus OX=10090 GN=Pdlim5 PE=1 SV=1;tr|D9J300|D9J300_MOUSE ENH isoform 1c OS=Mus musculus OX=10090 GN=Pdlim5 PE=1	11	2	2	2	0	0	0	0	0	0	1	1	0	0	0	0	0	0	1	1	0	0	0	0	0	0	0	0	0	0	0	0	0	0	1	1	0	0	0	0	0	0
P70296;D6RHS6;D3Z1V4	P70296;D6RHS6;D3Z1V4	1;1;1	1;1;1	1;1;1	Phosphatidylethanolamine-binding protein 1;Hippocampal cholinergic neurostimulating peptide	Pebp1	sp|P70296|PEBP1_MOUSE Phosphatidylethanolamine-binding protein 1 OS=Mus musculus OX=10090 GN=Pebp1 PE=1 SV=3;tr|D6RHS6|D6RHS6_MOUSE Phosphatidylethanolamine-binding protein 1 OS=Mus musculus OX=10090 GN=Pebp1 PE=1 SV=1;tr|D3Z1V4|D3Z1V4_MOUSE Phosphatidylet	3	1	1	1	0	0	0	0	0	0	0	1	0	0	0	0	0	0	1	0	0	0	0	0	0	0	0	0	0	0	0	0	0	0	0	1	0	0	0	0	0	0
P47857;A0A2R8VHA5;A0A2R8VHV2	P47857	6;1;1	6;1;1	5;1;1	ATP-dependent 6-phosphofructokinase, muscle type	Pfkm	sp|P47857|PFKAM_MOUSE ATP-dependent 6-phosphofructokinase, muscle type OS=Mus musculus OX=10090 GN=Pfkm PE=1 SV=3	3	6	6	5	0	0	0	0	0	0	1	2	5	0	0	0	1	0	3	2	0	0	0	0	0	0	0	0	0	0	0	0	0	0	1	2	5	0	0	0	1	0
P62962;Q5SX49	P62962;Q5SX49	1;1	1;1	1;1	Profilin-1;Profilin	Pfn1	sp|P62962|PROF1_MOUSE Profilin-1 OS=Mus musculus OX=10090 GN=Pfn1 PE=1 SV=2;tr|Q5SX49|Q5SX49_MOUSE Profilin OS=Mus musculus OX=10090 GN=Pfn1 PE=1 SV=1	2	1	1	1	0	0	0	0	0	0	0	1	0	0	0	0	0	0	1	0	0	0	0	0	0	0	0	0	0	0	0	0	0	0	0	1	0	0	0	0	0	0
Q9JJV2;D3YWS3	Q9JJV2;D3YWS3	1;1	1;1	1;1	Profilin-2;Profilin	Pfn2	sp|Q9JJV2|PROF2_MOUSE Profilin-2 OS=Mus musculus OX=10090 GN=Pfn2 PE=1 SV=3;tr|D3YWS3|D3YWS3_MOUSE Profilin OS=Mus musculus OX=10090 GN=Pfn2 PE=1 SV=1	2	1	1	1	0	0	0	0	0	0	0	0	1	0	0	0	0	0	0	1	0	0	0	0	0	0	0	0	0	0	0	0	0	0	0	0	1	0	0	0	0	0
P09411	P09411	1	1	1	Phosphoglycerate kinase 1	Pgk1	sp|P09411|PGK1_MOUSE Phosphoglycerate kinase 1 OS=Mus musculus OX=10090 GN=Pgk1 PE=1 SV=4	1	1	1	1	0	0	0	0	0	0	0	1	0	0	0	0	0	0	1	0	0	0	0	0	0	0	0	0	0	0	0	0	0	0	0	1	0	0	0	0	0	0
P67778;Q5SQG5	P67778;Q5SQG5	2;2	2;2	2;2	Prohibitin	Phb	sp|P67778|PHB_MOUSE Prohibitin OS=Mus musculus OX=10090 GN=Phb PE=1 SV=1;tr|Q5SQG5|Q5SQG5_MOUSE Prohibitin (Fragment) OS=Mus musculus OX=10090 GN=Phb PE=1 SV=1	2	2	2	2	0	0	0	0	0	0	2	2	0	0	0	0	0	1	2	0	0	0	0	0	0	0	0	0	0	0	0	0	0	0	2	2	0	0	0	0	0	1
O35129;F6Q8V7;F6QPR1	O35129;F6Q8V7;F6QPR1	2;2;2	2;2;2	2;2;2	Prohibitin-2	Phb2	sp|O35129|PHB2_MOUSE Prohibitin-2 OS=Mus musculus OX=10090 GN=Phb2 PE=1 SV=1;tr|F6Q8V7|F6Q8V7_MOUSE Prohibitin (Fragment) OS=Mus musculus OX=10090 GN=Phb2 PE=1 SV=1;tr|F6QPR1|F6QPR1_MOUSE Prohibitin (Fragment) OS=Mus musculus OX=10090 GN=Phb2 PE=1 SV=1	3	2	2	2	0	0	0	0	0	0	1	1	1	0	0	0	0	1	0	1	0	0	0	0	0	0	0	0	0	0	0	0	0	0	1	1	1	0	0	0	0	1
P07934	P07934	1	1	1	Phosphorylase b kinase gamma catalytic chain, skeletal muscle/heart isoform	Phkg1	sp|P07934|PHKG1_MOUSE Phosphorylase b kinase gamma catalytic chain, skeletal muscle/heart isoform OS=Mus musculus OX=10090 GN=Phkg1 PE=1 SV=3	1	1	1	1	0	0	0	1	1	1	0	0	0	1	1	1	1	0	0	0	1	0	0	1	0	1	1	1	0	0	0	1	1	1	0	0	0	1	1	1	1	0
P52480;A0A1L1SUV0;A0A1L1SSN6;A0A1L1STV8;A0A1L1SQV8;A0A1L1SU37;A0A1L1SVH2;A0A1L1ST52	P52480;A0A1L1SUV0;A0A1L1SSN6;A0A1L1STV8;A0A1L1SQV8;A0A1L1SU37;A0A1L1SVH2;A0A1L1ST52	2;2;2;2;2;2;1;1	2;2;2;2;2;2;1;1	2;2;2;2;2;2;1;1	Pyruvate kinase PKM	Pkm	sp|P52480|KPYM_MOUSE Pyruvate kinase PKM OS=Mus musculus OX=10090 GN=Pkm PE=1 SV=4;tr|A0A1L1SUV0|A0A1L1SUV0_MOUSE Pyruvate kinase (Fragment) OS=Mus musculus OX=10090 GN=Pkm PE=1 SV=1;tr|A0A1L1SSN6|A0A1L1SSN6_MOUSE Pyruvate kinase (Fragment) OS=Mus musculus	8	2	2	2	0	0	0	0	0	0	0	0	0	1	0	0	0	0	1	0	0	0	0	0	0	0	0	0	0	0	0	0	0	0	0	0	0	1	0	0	0	0
P60202	P60202	3	3	3	Myelin proteolipid protein	Plp1	sp|P60202|MYPR_MOUSE Myelin proteolipid protein OS=Mus musculus OX=10090 GN=Plp1 PE=1 SV=2	1	3	3	3	3	3	3	3	2	2	2	2	1	3	3	2	1	2	2	1	3	3	2	3	3	3	1	1	3	3	3	3	2	2	2	2	1	3	3	2	1	2
Q99JY8	Q99JY8	2	2	2	Lipid phosphate phosphohydrolase 3	Ppap2b	sp|Q99JY8|PLPP3_MOUSE Phospholipid phosphatase 3 OS=Mus musculus OX=10090 GN=Plpp3 PE=1 SV=1	1	2	2	2	0	0	0	0	0	0	2	2	0	0	0	0	0	2	2	0	0	0	0	0	0	0	0	0	0	0	0	0	0	0	2	2	0	0	0	0	0	2
P17742;A0A1L1SRX5;V9GXC1;V9GX31;A0A1L1SST0	P17742	3;1;1;1;1	3;1;1;1;1	3;1;1;1;1	Peptidyl-prolyl cis-trans isomerase A;Peptidyl-prolyl cis-trans isomerase A, N-terminally processed	Ppia	sp|P17742|PPIA_MOUSE Peptidyl-prolyl cis-trans isomerase A OS=Mus musculus OX=10090 GN=Ppia PE=1 SV=2	5	3	3	3	0	0	0	0	0	0	1	2	0	0	0	0	0	1	3	0	0	0	0	0	0	0	0	0	0	0	0	0	0	0	1	2	0	0	0	0	0	1
P63328;P48453;E9Q6P2;G3X8U7;E0CZ78;P48455;A0A2I3BPC5	P63328;P48453;E9Q6P2;G3X8U7;E0CZ78	3;2;2;2;2;1;1	3;2;2;2;2;1;1	3;2;2;2;2;1;1	Serine/threonine-protein phosphatase 2B catalytic subunit alpha isoform;Serine/threonine-protein phosphatase 2B catalytic subunit beta isoform;Serine/threonine-protein phosphatase	Ppp3ca;Ppp3cb	sp|P63328|PP2BA_MOUSE Serine/threonine-protein phosphatase 2B catalytic subunit alpha isoform OS=Mus musculus OX=10090 GN=Ppp3ca PE=1 SV=1;sp|P48453|PP2BB_MOUSE Serine/threonine-protein phosphatase 2B catalytic subunit beta isoform OS=Mus musculus OX=10090	7	3	3	3	0	0	0	0	0	0	1	1	0	0	0	0	0	0	2	0	1	1	0	0	1	0	0	0	0	0	0	0	0	0	1	1	0	0	0	0	0	0
P20108	P20108	1	1	1	Thioredoxin-dependent peroxide reductase, mitochondrial	Prdx3	sp|P20108|PRDX3_MOUSE Thioredoxin-dependent peroxide reductase, mitochondrial OS=Mus musculus OX=10090 GN=Prdx3 PE=1 SV=1	1	1	1	1	0	0	0	0	0	0	0	1	0	0	0	0	0	1	1	0	0	0	0	0	0	0	0	0	0	0	0	0	0	0	0	1	0	0	0	0	0	1
Q4VA93;Q3TQ39;P68404	Q4VA93;Q3TQ39;P68404	2;1;1	1;1;1	1;1;1	Protein kinase C;Protein kinase C beta type	Prkca;Prkcb	tr|Q4VA93|Q4VA93_MOUSE Protein kinase C OS=Mus musculus OX=10090 GN=Prkca PE=1 SV=1;tr|Q3TQ39|Q3TQ39_MOUSE Protein kinase C alpha type OS=Mus musculus OX=10090 GN=Prkca PE=1 SV=1;sp|P68404|KPCB_MOUSE Protein kinase C beta type OS=Mus musculus OX=10090 GN=P	3	2	1	1	0	0	0	0	0	0	2	1	0	0	1	0	0	0	1	1	0	0	0	0	0	0	0	0	0	0	0	0	0	0	1	0	0	0	0	0	0	0
P63318;Q2NKI4;P20444	P63318;Q2NKI4	10;7;1	10;7;1	9;6;0	Protein kinase C gamma type;Protein kinase C	Prkcg	sp|P63318|KPCG_MOUSE Protein kinase C gamma type OS=Mus musculus OX=10090 GN=Prkcg PE=1 SV=1;tr|Q2NKI4|Q2NKI4_MOUSE Protein kinase C OS=Mus musculus OX=10090 GN=Prkcg PE=1 SV=1	3	10	10	9	1	0	3	2	1	3	5	5	5	0	2	1	2	3	4	5	1	0	2	0	1	1	0	1	1	0	3	2	1	3	5	5	5	0	2	1	2	3
P04925	P04925	3	3	3	Major prion protein	Prnp	sp|P04925|PRIO_MOUSE Major prion protein OS=Mus musculus OX=10090 GN=Prnp PE=1 SV=2	1	3	3	3	0	0	0	0	0	0	1	1	3	0	0	0	0	1	1	3	0	0	0	0	0	0	0	0	0	0	0	0	0	0	1	1	3	0	0	0	0	1
O35449	O35449	4	4	4	Proline-rich transmembrane protein 1	Prrt1	sp|O35449|PRRT1_MOUSE Proline-rich transmembrane protein 1 OS=Mus musculus OX=10090 GN=Prrt1 PE=1 SV=1	1	4	4	4	0	0	0	0	0	0	1	0	0	2	4	4	2	2	2	1	3	4	3	4	2	3	2	3	0	0	0	0	0	0	1	0	0	2	4	4	2	2
Q9Z1R9	Q9Z1R9	1	1	1		Prss1	tr|Q9Z1R9|Q9Z1R9_MOUSE Protease, serine 1 (trypsin 1) OS=Mus musculus OX=10090 GN=Prss1 PE=1 SV=1	1	1	1	1	0	0	1	0	0	0	1	1	0	0	0	0	0	1	1	0	0	0	0	0	0	0	0	0	0	0	1	0	0	0	1	1	0	0	0	0	0	1
Q2PFD7;Q8C0E9;E9PUC5;F6Z9E6;A0A1D5RLK2;A0A1D5RMH7	Q2PFD7;Q8C0E9;E9PUC5;F6Z9E6;A0A1D5RLK2;A0A1D5RMH7	1;1;1;1;1;1	1;1;1;1;1;1	1;1;1;1;1;1	PH and SEC7 domain-containing protein 3	Psd3	sp|Q2PFD7|PSD3_MOUSE PH and SEC7 domain-containing protein 3 OS=Mus musculus OX=10090 GN=Psd3 PE=1 SV=2;tr|Q8C0E9|Q8C0E9_MOUSE PH and SEC7 domain-containing protein 3 OS=Mus musculus OX=10090 GN=Psd3 PE=1 SV=1;tr|E9PUC5|E9PUC5_MOUSE PH and SEC7 domain-cont	6	1	1	1	0	0	0	0	0	0	0	0	0	0	0	0	0	0	0	0	0	1	0	0	0	0	0	0	0	0	0	0	0	0	0	0	0	0	0	0	0	0
Q8R326;F7D909	Q8R326	9;3	9;3	9;3	Paraspeckle component 1	Pspc1	sp|Q8R326|PSPC1_MOUSE Paraspeckle component 1 OS=Mus musculus OX=10090 GN=Pspc1 PE=1 SV=1	2	9	9	9	0	0	0	0	0	0	5	4	7	0	0	0	0	4	4	7	0	0	0	0	0	0	0	0	0	0	0	0	0	0	5	4	7	0	0	0	0	4
Q8BUM3	Q8BUM3	1	1	1	Tyrosine-protein phosphatase non-receptor type 7	Ptpn7	sp|Q8BUM3|PTN7_MOUSE Tyrosine-protein phosphatase non-receptor type 7 OS=Mus musculus OX=10090 GN=Ptpn7 PE=1 SV=1	1	1	1	1	0	0	0	0	0	0	1	1	1	0	0	0	0	1	1	0	0	0	0	0	0	0	0	0	0	0	0	0	0	0	1	1	1	0	0	0	0	1
Q80U78;E9Q6M7;Q3TTW5	Q80U78;E9Q6M7;Q3TTW5	1;1;1	1;1;1	1;1;1	Pumilio homolog 1	Pum1	sp|Q80U78|PUM1_MOUSE Pumilio homolog 1 OS=Mus musculus OX=10090 GN=Pum1 PE=1 SV=2;tr|E9Q6M7|E9Q6M7_MOUSE Pumilio homolog 1 OS=Mus musculus OX=10090 GN=Pum1 PE=1 SV=1;tr|Q3TTW5|Q3TTW5_MOUSE Pumilio homolog 1 OS=Mus musculus OX=10090 GN=Pum1 PE=1 SV=1	3	1	1	1	0	0	0	0	0	0	0	0	1	0	0	0	0	0	0	0	0	0	0	0	0	0	0	0	0	0	0	0	0	0	0	0	1	0	0	0	0	0
P42669	P42669	5	5	5	Transcriptional activator protein Pur-alpha	Pura	sp|P42669|PURA_MOUSE Transcriptional activator protein Pur-alpha OS=Mus musculus OX=10090 GN=Pura PE=1 SV=1	1	5	5	5	0	0	0	0	0	0	3	3	2	0	0	0	0	3	3	3	0	0	0	0	0	0	0	0	0	0	0	0	0	0	3	3	2	0	0	0	0	3
P61027	P61027	1	1	1	Ras-related protein Rab-10	Rab10	sp|P61027|RAB10_MOUSE Ras-related protein Rab-10 OS=Mus musculus OX=10090 GN=Rab10 PE=1 SV=1	1	1	1	1	0	0	0	1	0	1	0	0	0	1	1	0	1	0	0	0	0	1	1	0	1	1	1	1	0	0	0	1	0	1	0	0	0	1	1	0	1	0
Q91V41;A0A2R8VHW9;Q50HX3	Q91V41;A0A2R8VHW9;Q50HX3	1;1;1	1;1;1	1;1;1	Ras-related protein Rab-14	Rab14	sp|Q91V41|RAB14_MOUSE Ras-related protein Rab-14 OS=Mus musculus OX=10090 GN=Rab14 PE=1 SV=3;tr|A0A2R8VHW9|A0A2R8VHW9_MOUSE Ras-related protein Rab-14 (Fragment) OS=Mus musculus OX=10090 GN=Rab14 PE=1 SV=1;tr|Q50HX3|Q50HX3_MOUSE RAB14 protein variant OS=Mu	3	1	1	1	0	0	0	0	0	0	1	1	0	0	0	0	0	1	1	0	0	0	0	0	0	0	0	0	0	0	0	0	0	0	1	1	0	0	0	0	0	1
P53994	P53994	1	1	1	Ras-related protein Rab-2A	Rab2a	sp|P53994|RAB2A_MOUSE Ras-related protein Rab-2A OS=Mus musculus OX=10090 GN=Rab2a PE=1 SV=1	1	1	1	1	0	0	0	0	0	0	0	0	0	0	0	0	0	1	1	0	0	0	0	0	0	0	0	0	0	0	0	0	0	0	0	0	0	0	0	0	0	1
P63011;D3YZP5	P63011	6;1	6;1	4;1	Ras-related protein Rab-3A	Rab3a	sp|P63011|RAB3A_MOUSE Ras-related protein Rab-3A OS=Mus musculus OX=10090 GN=Rab3a PE=1 SV=1	2	6	6	4	0	0	0	1	0	0	4	4	4	1	1	0	0	4	4	4	1	0	0	0	0	1	0	0	0	0	0	1	0	0	4	4	4	1	1	0	0	4
D3YWL1;D3YW33;P35276;P55258;P61028;Q9CZT8;P62823;Q9DD03;Q9CXS2;A0A286YDR2;A2A7Z6	D3YWL1;D3YW33;P35276	3;3;3;1;1;1;1;1;1;1;1	1;1;1;0;0;0;0;0;0;0;0	1;1;1;0;0;0;0;0;0;0;0	Ras-related protein Rab-3D	Rab3d	tr|D3YWL1|D3YWL1_MOUSE Ras-related protein Rab-3D (Fragment) OS=Mus musculus OX=10090 GN=Rab3d PE=1 SV=1;tr|D3YW33|D3YW33_MOUSE Ras-related protein Rab-3D OS=Mus musculus OX=10090 GN=Rab3d PE=1 SV=1;sp|P35276|RAB3D_MOUSE Ras-related protein Rab-3D OS=Mus m	11	3	1	1	1	1	0	1	0	1	1	1	1	1	1	1	0	1	1	1	1	1	1	1	0	1	0	1	1	1	0	1	0	1	0	0	0	1	1	1	0	0
P61294;P35279;Q8BHD0;A0A1L1SRS6;D3YV69	P61294;P35279;Q8BHD0;A0A1L1SRS6;D3YV69	1;1;1;1;1	1;1;1;1;1	1;1;1;1;1	Ras-related protein Rab-6B;Ras-related protein Rab-6A;Ras-related protein Rab-39A	Rab6b;Rab6a;Rab39a	sp|P61294|RAB6B_MOUSE Ras-related protein Rab-6B OS=Mus musculus OX=10090 GN=Rab6b PE=1 SV=1;sp|P35279|RAB6A_MOUSE Ras-related protein Rab-6A OS=Mus musculus OX=10090 GN=Rab6a PE=1 SV=4;sp|Q8BHD0|RB39A_MOUSE Ras-related protein Rab-39A OS=Mus musculus OX=1	5	1	1	1	1	0	1	0	0	1	1	1	1	1	1	1	1	1	1	1	1	1	0	1	1	1	0	1	1	0	1	0	0	1	1	1	1	1	1	1	1	1
P63001;Q3TLP8	P63001;Q3TLP8	1;1	1;1	1;1	Ras-related C3 botulinum toxin substrate 1	Rac1	sp|P63001|RAC1_MOUSE Ras-related C3 botulinum toxin substrate 1 OS=Mus musculus OX=10090 GN=Rac1 PE=1 SV=1;tr|Q3TLP8|Q3TLP8_MOUSE Ras-related C3 botulinum toxin substrate 1 OS=Mus musculus OX=10090 GN=Rac1 PE=1 SV=1	2	1	1	1	0	0	0	0	0	0	1	1	1	0	0	0	0	1	1	1	0	0	0	0	0	0	0	0	0	0	0	0	0	0	1	1	1	0	0	0	0	1
Q99NG0;E9QKL0	Q99NG0;E9QKL0	1;1	1;1	1;1	Helicase ARIP4	Rad54l2	sp|Q99NG0|ARIP4_MOUSE Helicase ARIP4 OS=Mus musculus OX=10090 GN=Rad54l2 PE=1 SV=1;tr|E9QKL0|E9QKL0_MOUSE Helicase ARIP4 OS=Mus musculus OX=10090 GN=Rad54l2 PE=1 SV=1	2	1	1	1	0	0	0	1	1	0	0	0	0	0	0	0	0	0	0	0	1	0	0	0	1	0	0	1	0	0	0	1	1	0	0	0	0	0	0	0	0	0
Q99JI6;P62835;A0A1W2P777;A0A0G2JDL9	Q99JI6;P62835;A0A1W2P777;A0A0G2JDL9	1;1;1;1	1;1;1;1	1;1;1;1	Ras-related protein Rap-1b;Ras-related protein Rap-1A	Rap1b;Rap1a	sp|Q99JI6|RAP1B_MOUSE Ras-related protein Rap-1b OS=Mus musculus OX=10090 GN=Rap1b PE=1 SV=2;sp|P62835|RAP1A_MOUSE Ras-related protein Rap-1A OS=Mus musculus OX=10090 GN=Rap1a PE=1 SV=1;tr|A0A1W2P777|A0A1W2P777_MOUSE Ras-related protein Rap-1b (Fragment) O	4	1	1	1	0	0	0	1	0	0	0	0	0	1	0	0	0	0	0	0	0	0	0	0	0	0	0	0	0	0	0	1	0	0	0	0	0	1	0	0	0	0
Q8BG51	Q8BG51	1	1	1	Mitochondrial Rho GTPase 1	Rhot1	sp|Q8BG51|MIRO1_MOUSE Mitochondrial Rho GTPase 1 OS=Mus musculus OX=10090 GN=Rhot1 PE=1 SV=1	1	1	1	1	0	0	0	0	0	0	1	0	0	0	0	0	0	0	0	0	0	0	0	0	0	0	0	0	0	0	0	0	0	0	1	0	0	0	0	0	0	0
P47708	P47708	2	2	2	Rabphilin-3A	Rph3a	sp|P47708|RP3A_MOUSE Rabphilin-3A OS=Mus musculus OX=10090 GN=Rph3a PE=1 SV=2	1	2	2	2	0	0	1	0	0	0	1	0	1	0	0	0	0	1	0	0	0	0	0	0	0	0	0	0	0	0	1	0	0	0	1	0	1	0	0	0	0	1
P53026;A0A3B2WDD2;A0A3B2WBL1;Q5XJF6;A0A3B2W824	P53026;A0A3B2WDD2;A0A3B2WBL1;Q5XJF6;A0A3B2W824	2;2;2;2;1	2;2;2;2;1	2;2;2;2;1	60S ribosomal protein L10a;Ribosomal protein	Rpl10a	sp|P53026|RL10A_MOUSE 60S ribosomal protein L10a OS=Mus musculus OX=10090 GN=Rpl10a PE=1 SV=3;tr|A0A3B2WDD2|A0A3B2WDD2_MOUSE Ribosomal protein OS=Mus musculus OX=10090 GN=Rpl10a PE=1 SV=1;tr|A0A3B2WBL1|A0A3B2WBL1_MOUSE Ribosomal protein OS=Mus musculus OX=	5	2	2	2	0	0	0	0	0	0	2	1	1	0	0	0	0	2	1	1	0	0	0	0	0	0	0	0	0	0	0	0	0	0	2	1	1	0	0	0	0	2
Q9CXW4;A2BH06	Q9CXW4;A2BH06	2;1	2;1	2;1	60S ribosomal protein L11	Rpl11	sp|Q9CXW4|RL11_MOUSE 60S ribosomal protein L11 OS=Mus musculus OX=10090 GN=Rpl11 PE=1 SV=4;tr|A2BH06|A2BH06_MOUSE 60S ribosomal protein L11 (Fragment) OS=Mus musculus OX=10090 GN=Rpl11 PE=1 SV=1	2	2	2	2	0	0	0	0	0	0	2	2	2	0	0	0	0	2	2	2	0	0	0	0	0	0	0	0	0	0	0	0	0	0	2	2	2	0	0	0	0	2
P35979	P35979	3	3	3	60S ribosomal protein L12	Rpl12	sp|P35979|RL12_MOUSE 60S ribosomal protein L12 OS=Mus musculus OX=10090 GN=Rpl12 PE=1 SV=2	1	3	3	3	0	0	0	0	0	0	3	3	3	0	0	0	0	3	3	3	0	0	0	0	0	0	0	0	0	0	0	0	0	0	3	3	3	0	0	0	0	3
P47963	P47963	3	3	3	60S ribosomal protein L13	Rpl13	sp|P47963|RL13_MOUSE 60S ribosomal protein L13 OS=Mus musculus OX=10090 GN=Rpl13 PE=1 SV=3	1	3	3	3	0	0	0	0	0	0	2	2	3	0	0	0	0	2	2	2	0	0	0	0	0	0	0	0	0	0	0	0	0	0	2	2	3	0	0	0	0	2
P19253;A0A1B0GQW6;A0A1B0GSF0;A0A1B0GSQ6;A0A1B0GTA1;A0A1B0GS68;A0A1B0GSB2	P19253;A0A1B0GQW6;A0A1B0GSF0;A0A1B0GSQ6;A0A1B0GTA1;A0A1B0GS68;A0A1B0GSB2	2;2;2;2;2;2;1	2;2;2;2;2;2;1	2;2;2;2;2;2;1	60S ribosomal protein L13a	Rpl13a	sp|P19253|RL13A_MOUSE 60S ribosomal protein L13a OS=Mus musculus OX=10090 GN=Rpl13a PE=1 SV=4;tr|A0A1B0GQW6|A0A1B0GQW6_MOUSE 60S ribosomal protein L13a (Fragment) OS=Mus musculus OX=10090 GN=Rpl13a PE=3 SV=2;tr|A0A1B0GSF0|A0A1B0GSF0_MOUSE 60S ribosomal pro	7	2	2	2	0	0	0	0	0	0	0	0	2	0	0	0	0	0	0	2	0	0	0	0	0	0	0	0	0	0	0	0	0	0	0	0	2	0	0	0	0	0
Q9CR57;A0A1L1SUF6	Q9CR57;A0A1L1SUF6	3;2	3;2	3;2	60S ribosomal protein L14	Rpl14	sp|Q9CR57|RL14_MOUSE 60S ribosomal protein L14 OS=Mus musculus OX=10090 GN=Rpl14 PE=1 SV=3;tr|A0A1L1SUF6|A0A1L1SUF6_MOUSE 60S ribosomal protein L14 (Fragment) OS=Mus musculus OX=10090 GN=Rpl14 PE=1 SV=1	2	3	3	3	0	0	0	0	0	0	2	3	0	0	0	0	0	2	3	0	0	0	0	0	0	0	0	0	0	0	0	0	0	0	2	3	0	0	0	0	0	2
Q9CPR4;Q6ZWZ7	Q9CPR4;Q6ZWZ7	1;1	1;1	1;1	60S ribosomal protein L17	Rpl17	sp|Q9CPR4|RL17_MOUSE 60S ribosomal protein L17 OS=Mus musculus OX=10090 GN=Rpl17 PE=1 SV=3;tr|Q6ZWZ7|Q6ZWZ7_MOUSE 60S ribosomal protein L17 OS=Mus musculus OX=10090 GN=Rpl17 PE=1 SV=1	2	1	1	1	0	0	0	0	0	0	1	1	1	0	0	0	0	1	1	1	0	0	0	0	0	0	0	0	0	0	0	0	0	0	1	1	1	0	0	0	0	1
P35980;A0A1B0GSF7;A0A1B0GQU8;A0A1B0GRZ3;A0A1B0GS28;A0A1B0GSA8;A0A1B0GSS8	P35980;A0A1B0GSF7;A0A1B0GQU8;A0A1B0GRZ3;A0A1B0GS28;A0A1B0GSA8;A0A1B0GSS8	2;2;2;1;1;1;1	2;2;2;1;1;1;1	2;2;2;1;1;1;1	60S ribosomal protein L18	Rpl18	sp|P35980|RL18_MOUSE 60S ribosomal protein L18 OS=Mus musculus OX=10090 GN=Rpl18 PE=1 SV=3;tr|A0A1B0GSF7|A0A1B0GSF7_MOUSE 60S ribosomal protein L18 OS=Mus musculus OX=10090 GN=Rpl18 PE=1 SV=1;tr|A0A1B0GQU8|A0A1B0GQU8_MOUSE 60S ribosomal protein L18 OS=Mus	7	2	2	2	0	0	0	0	0	0	2	2	0	0	0	0	0	2	2	0	0	0	0	0	0	0	0	0	0	0	0	0	0	0	2	2	0	0	0	0	0	2
P84099;A2A547	P84099;A2A547	1;1	1;1	1;1	60S ribosomal protein L19;Ribosomal protein L19	Rpl19	sp|P84099|RL19_MOUSE 60S ribosomal protein L19 OS=Mus musculus OX=10090 GN=Rpl19 PE=1 SV=1;tr|A2A547|A2A547_MOUSE Ribosomal protein L19 OS=Mus musculus OX=10090 GN=Rpl19 PE=1 SV=1	2	1	1	1	0	0	0	0	0	0	0	0	1	0	0	0	0	0	0	1	0	0	0	0	0	0	0	0	0	0	0	0	0	0	0	0	1	0	0	0	0	0
O09167;Q9CQM8	O09167;Q9CQM8	1;1	1;1	1;1	60S ribosomal protein L21	Rpl21	sp|O09167|RL21_MOUSE 60S ribosomal protein L21 OS=Mus musculus OX=10090 GN=Rpl21 PE=1 SV=3;tr|Q9CQM8|Q9CQM8_MOUSE 60S ribosomal protein L21 OS=Mus musculus OX=10090 GN=Rpl21 PE=1 SV=1	2	1	1	1	0	0	0	0	0	0	1	1	1	0	0	0	0	1	1	1	0	0	0	0	0	0	0	0	0	0	0	0	0	0	1	1	1	0	0	0	0	1
P67984	P67984	2	2	2	60S ribosomal protein L22	Rpl22	sp|P67984|RL22_MOUSE 60S ribosomal protein L22 OS=Mus musculus OX=10090 GN=Rpl22 PE=1 SV=2	1	2	2	2	0	0	0	0	0	0	2	2	0	0	0	0	0	2	2	0	0	0	0	0	0	0	0	0	0	0	0	0	0	0	2	2	0	0	0	0	0	2
P62751	P62751	1	1	1	60S ribosomal protein L23a	Rpl23a	sp|P62751|RL23A_MOUSE 60S ribosomal protein L23a OS=Mus musculus OX=10090 GN=Rpl23a PE=1 SV=1	1	1	1	1	0	0	0	0	0	0	1	1	0	0	0	0	0	1	1	0	0	0	0	0	0	0	0	0	0	0	0	0	0	0	1	1	0	0	0	0	0	1
Q8BP67	Q8BP67	1	1	1	60S ribosomal protein L24	Rpl24	sp|Q8BP67|RL24_MOUSE 60S ribosomal protein L24 OS=Mus musculus OX=10090 GN=Rpl24 PE=1 SV=2	1	1	1	1	0	0	0	0	0	0	1	1	1	0	0	0	0	1	1	1	0	0	0	0	0	0	0	0	0	0	0	0	0	0	1	1	1	0	0	0	0	1
P61255;B1ARA3;B1ARA5	P61255;B1ARA3;B1ARA5	1;1;1	1;1;1	1;1;1	60S ribosomal protein L26	Rpl26	sp|P61255|RL26_MOUSE 60S ribosomal protein L26 OS=Mus musculus OX=10090 GN=Rpl26 PE=1 SV=1;tr|B1ARA3|B1ARA3_MOUSE 60S ribosomal protein L26 (Fragment) OS=Mus musculus OX=10090 GN=Rpl26 PE=1 SV=1;tr|B1ARA5|B1ARA5_MOUSE 60S ribosomal protein L26 OS=Mus muscu	3	1	1	1	0	0	0	0	0	0	1	1	0	0	0	0	0	1	1	0	0	0	0	0	0	0	0	0	0	0	0	0	0	0	1	1	0	0	0	0	0	1
P61358	P61358	1	1	1	60S ribosomal protein L27	Rpl27	sp|P61358|RL27_MOUSE 60S ribosomal protein L27 OS=Mus musculus OX=10090 GN=Rpl27 PE=1 SV=2	1	1	1	1	0	0	0	0	0	0	0	0	1	0	0	0	0	0	0	1	0	0	0	0	0	0	0	0	0	0	0	0	0	0	0	0	1	0	0	0	0	0
P27659;A0A087WNS0;A0A087WQK0	P27659;A0A087WNS0;A0A087WQK0	3;2;2	3;2;2	3;2;2	60S ribosomal protein L3	Rpl3	sp|P27659|RL3_MOUSE 60S ribosomal protein L3 OS=Mus musculus OX=10090 GN=Rpl3 PE=1 SV=3;tr|A0A087WNS0|A0A087WNS0_MOUSE 60S ribosomal protein L3 OS=Mus musculus OX=10090 GN=Rpl3 PE=1 SV=1;tr|A0A087WQK0|A0A087WQK0_MOUSE 60S ribosomal protein L3 (Fragment) OS	3	3	3	3	0	0	0	0	0	0	2	2	2	0	0	0	0	2	2	1	0	0	0	0	0	0	0	0	0	0	0	0	0	0	2	2	2	0	0	0	0	2
P62889;A0A2I3BQF4	P62889;A0A2I3BQF4	1;1	1;1	1;1	60S ribosomal protein L30	Rpl30	sp|P62889|RL30_MOUSE 60S ribosomal protein L30 OS=Mus musculus OX=10090 GN=Rpl30 PE=1 SV=2;tr|A0A2I3BQF4|A0A2I3BQF4_MOUSE 60S ribosomal protein L30 OS=Mus musculus OX=10090 GN=Rpl30 PE=1 SV=1	2	1	1	1	0	0	0	0	0	0	1	1	0	0	0	0	0	1	1	0	0	0	0	0	0	0	0	0	0	0	0	0	0	0	1	1	0	0	0	0	0	1
P62900;A0A0A6YX26;A0A0A6YXL3	P62900;A0A0A6YX26	3;2;1	3;2;1	3;2;1	60S ribosomal protein L31	Rpl31	sp|P62900|RL31_MOUSE 60S ribosomal protein L31 OS=Mus musculus OX=10090 GN=Rpl31 PE=1 SV=1;tr|A0A0A6YX26|A0A0A6YX26_MOUSE 60S ribosomal protein L31 OS=Mus musculus OX=10090 GN=Rpl31 PE=1 SV=1	3	3	3	3	0	0	0	0	0	0	1	1	2	0	0	0	0	1	1	2	0	0	0	0	0	0	0	0	0	0	0	0	0	0	1	1	2	0	0	0	0	1
Q6ZWV7	Q6ZWV7	1	1	1	60S ribosomal protein L35	Rpl35	sp|Q6ZWV7|RL35_MOUSE 60S ribosomal protein L35 OS=Mus musculus OX=10090 GN=Rpl35 PE=1 SV=1	1	1	1	1	0	0	0	0	0	0	0	0	1	0	0	0	0	0	0	1	0	0	0	0	0	0	0	0	0	0	0	0	0	0	0	0	1	0	0	0	0	0
Q9D8E6	Q9D8E6	2	2	2	60S ribosomal protein L4	Rpl4	sp|Q9D8E6|RL4_MOUSE 60S ribosomal protein L4 OS=Mus musculus OX=10090 GN=Rpl4 PE=1 SV=3	1	2	2	2	0	0	0	0	0	0	1	1	1	0	0	0	0	1	1	1	0	0	0	0	0	0	0	0	0	0	0	0	0	0	1	1	1	0	0	0	0	1
P47962;D3YYV8	P47962	3;1	3;1	3;1	60S ribosomal protein L5	Rpl5	sp|P47962|RL5_MOUSE 60S ribosomal protein L5 OS=Mus musculus OX=10090 GN=Rpl5 PE=1 SV=3	2	3	3	3	0	0	0	0	0	0	0	0	3	0	0	0	0	0	0	3	0	0	0	0	0	0	0	0	0	0	0	0	0	0	0	0	3	0	0	0	0	0
P47911	P47911	2	2	2	60S ribosomal protein L6	Rpl6	sp|P47911|RL6_MOUSE 60S ribosomal protein L6 OS=Mus musculus OX=10090 GN=Rpl6 PE=1 SV=3	1	2	2	2	0	0	0	0	0	0	1	1	1	0	0	0	0	1	1	1	0	0	0	0	0	0	0	0	0	0	0	0	0	0	1	1	1	0	0	0	0	1
P14148;F6XI62	P14148;F6XI62	3;3	3;3	3;3	60S ribosomal protein L7	Rpl7	sp|P14148|RL7_MOUSE 60S ribosomal protein L7 OS=Mus musculus OX=10090 GN=Rpl7 PE=1 SV=2;tr|F6XI62|F6XI62_MOUSE 60S ribosomal protein L7 (Fragment) OS=Mus musculus OX=10090 GN=Rpl7 PE=1 SV=1	2	3	3	3	0	0	0	0	0	0	3	3	2	0	0	0	0	3	3	2	0	0	0	0	0	0	0	0	0	0	0	0	0	0	3	3	2	0	0	0	0	3
P12970;V9GX35	P12970	4;1	4;1	4;1	60S ribosomal protein L7a	Rpl7a	sp|P12970|RL7A_MOUSE 60S ribosomal protein L7a OS=Mus musculus OX=10090 GN=Rpl7a PE=1 SV=2	2	4	4	4	0	0	0	0	0	0	3	2	4	0	0	0	0	3	3	4	0	0	0	0	0	0	0	0	0	0	0	0	0	0	3	2	4	0	0	0	0	3
P51410;A0A140T8T4;D3YZT0;D3Z629;A0A0G2JES3	P51410;A0A140T8T4;D3YZT0;D3Z629;A0A0G2JES3	2;2;1;1;1	2;2;1;1;1	2;2;1;1;1	60S ribosomal protein L9	Rpl9	sp|P51410|RL9_MOUSE 60S ribosomal protein L9 OS=Mus musculus OX=10090 GN=Rpl9 PE=1 SV=2;tr|A0A140T8T4|A0A140T8T4_MOUSE 60S ribosomal protein L9 OS=Mus musculus OX=10090 GN=Rpl9-ps6 PE=3 SV=1;tr|D3YZT0|D3YZT0_MOUSE 60S ribosomal protein L9 OS=Mus musculus O	5	2	2	2	0	0	0	0	0	0	2	2	1	0	0	0	0	2	2	1	0	0	0	0	0	0	0	0	0	0	0	0	0	0	2	2	1	0	0	0	0	2
P14869;S4R1N1;D3YVM5	P14869;S4R1N1	5;3;2	5;3;2	5;3;2	60S acidic ribosomal protein P0	Rplp0	sp|P14869|RLA0_MOUSE 60S acidic ribosomal protein P0 OS=Mus musculus OX=10090 GN=Rplp0 PE=1 SV=3;tr|S4R1N1|S4R1N1_MOUSE 60S acidic ribosomal protein P0 (Fragment) OS=Mus musculus OX=10090 GN=Rplp0 PE=1 SV=1	3	5	5	5	0	0	0	0	0	0	5	5	2	0	0	0	0	5	5	2	0	0	0	0	0	0	0	0	0	0	0	0	0	0	5	5	2	0	0	0	0	5
P62301;Q921R2;A0A0U1RQ71	P62301;Q921R2;A0A0U1RQ71	2;2;1	2;2;1	2;2;1	40S ribosomal protein S13	Rps13	sp|P62301|RS13_MOUSE 40S ribosomal protein S13 OS=Mus musculus OX=10090 GN=Rps13 PE=1 SV=2;tr|Q921R2|Q921R2_MOUSE 40S ribosomal protein S13 OS=Mus musculus OX=10090 GN=Rps13 PE=1 SV=1;tr|A0A0U1RQ71|A0A0U1RQ71_MOUSE 40S ribosomal protein S13 OS=Mus musculus	3	2	2	2	0	0	0	0	0	0	2	2	0	0	0	0	0	2	2	0	0	0	0	0	0	0	0	0	0	0	0	0	0	0	2	2	0	0	0	0	0	2
P62264;D3YVF4;D3Z7I1	P62264;D3YVF4;D3Z7I1	2;1;1	2;1;1	2;1;1	40S ribosomal protein S14	Rps14	sp|P62264|RS14_MOUSE 40S ribosomal protein S14 OS=Mus musculus OX=10090 GN=Rps14 PE=1 SV=3;tr|D3YVF4|D3YVF4_MOUSE 40S ribosomal protein S14 (Fragment) OS=Mus musculus OX=10090 GN=Rps14 PE=1 SV=1;tr|D3Z7I1|D3Z7I1_MOUSE 40S ribosomal protein S14 (Fragment) O	3	2	2	2	0	0	0	0	0	0	1	2	1	0	0	0	0	2	2	1	0	0	0	0	0	0	0	0	0	0	0	0	0	0	1	2	1	0	0	0	0	2
P62245;D3YVB4;D3Z712;F8WJ41	P62245;D3YVB4;D3Z712;F8WJ41	2;2;2;2	2;2;2;2	2;2;2;2	40S ribosomal protein S15a	Rps15a	sp|P62245|RS15A_MOUSE 40S ribosomal protein S15a OS=Mus musculus OX=10090 GN=Rps15a PE=1 SV=2;tr|D3YVB4|D3YVB4_MOUSE 40S ribosomal protein S15a (Fragment) OS=Mus musculus OX=10090 GN=Rps15a PE=1 SV=1;tr|D3Z712|D3Z712_MOUSE 40S ribosomal protein S15a (Fragm	4	2	2	2	0	0	0	0	0	0	2	2	1	0	0	0	0	2	2	1	0	0	0	0	0	0	0	0	0	0	0	0	0	0	2	2	1	0	0	0	0	2
P14131	P14131	2	2	2	40S ribosomal protein S16	Rps16	sp|P14131|RS16_MOUSE 40S ribosomal protein S16 OS=Mus musculus OX=10090 GN=Rps16 PE=1 SV=4	1	2	2	2	0	0	0	0	0	0	2	2	1	0	0	0	0	2	2	1	0	1	0	0	0	0	0	0	0	0	0	0	0	0	2	2	1	0	0	0	0	2
P63276	P63276	2	2	2	40S ribosomal protein S17	Rps17	sp|P63276|RS17_MOUSE 40S ribosomal protein S17 OS=Mus musculus OX=10090 GN=Rps17 PE=1 SV=2	1	2	2	2	0	0	0	0	1	0	1	1	0	0	0	0	0	1	1	1	0	0	0	0	0	1	0	0	0	0	0	0	1	0	1	1	0	0	0	0	0	1
P62270;F6YVP7;A0A1Y7VKY1;S4R1N6;A0A3Q4EGP3	P62270;F6YVP7;A0A1Y7VKY1;S4R1N6	8;8;8;7;2	8;8;8;7;2	8;8;8;7;2	40S ribosomal protein S18	Rps18;Gm10260	sp|P62270|RS18_MOUSE 40S ribosomal protein S18 OS=Mus musculus OX=10090 GN=Rps18 PE=1 SV=3;tr|F6YVP7|F6YVP7_MOUSE 40S ribosomal protein S18 OS=Mus musculus OX=10090 GN=Rps18-ps6 PE=3 SV=2;tr|A0A1Y7VKY1|A0A1Y7VKY1_MOUSE 40S ribosomal protein S18 OS=Mus musc	5	8	8	8	0	0	0	0	0	0	2	2	7	0	0	0	0	2	1	7	1	0	0	0	1	1	0	0	0	0	0	0	0	0	2	2	7	0	0	0	0	2
Q9CZX8;D3YUT3;D3YUG3;D3Z5R8;D3Z722;S4R223	Q9CZX8;D3YUT3;D3YUG3;D3Z5R8;D3Z722	3;3;3;3;3;1	3;3;3;3;3;1	3;3;3;3;3;1	40S ribosomal protein S19	Rps19	sp|Q9CZX8|RS19_MOUSE 40S ribosomal protein S19 OS=Mus musculus OX=10090 GN=Rps19 PE=1 SV=3;tr|D3YUT3|D3YUT3_MOUSE 40S ribosomal protein S19 (Fragment) OS=Mus musculus OX=10090 GN=Rps19 PE=1 SV=2;tr|D3YUG3|D3YUG3_MOUSE 40S ribosomal protein S19 (Fragment) O	6	3	3	3	0	0	0	0	0	0	2	2	2	1	0	0	0	2	2	2	0	0	0	0	0	0	0	0	0	0	0	0	0	0	2	2	2	1	0	0	0	2
P25444;D3YVC1;D3YWJ3	P25444;D3YVC1;D3YWJ3	3;2;2	3;2;2	3;2;2	40S ribosomal protein S2	Rps2	sp|P25444|RS2_MOUSE 40S ribosomal protein S2 OS=Mus musculus OX=10090 GN=Rps2 PE=1 SV=3;tr|D3YVC1|D3YVC1_MOUSE 40S ribosomal protein S2 (Fragment) OS=Mus musculus OX=10090 GN=Rps2 PE=1 SV=1;tr|D3YWJ3|D3YWJ3_MOUSE 40S ribosomal protein S2 OS=Mus musculus OX	3	3	3	3	0	0	0	0	0	0	1	1	2	0	0	0	0	1	1	2	0	0	0	0	0	0	0	0	0	0	0	0	0	0	1	1	2	0	0	0	0	1
P60867	P60867	2	2	2	40S ribosomal protein S20	Rps20	sp|P60867|RS20_MOUSE 40S ribosomal protein S20 OS=Mus musculus OX=10090 GN=Rps20 PE=1 SV=1	1	2	2	2	0	0	0	0	0	0	1	1	1	0	0	0	0	1	1	1	0	0	0	0	0	0	0	0	0	0	0	0	0	0	1	1	1	0	0	0	0	1
P62267	P62267	2	2	2	40S ribosomal protein S23	Rps23	sp|P62267|RS23_MOUSE 40S ribosomal protein S23 OS=Mus musculus OX=10090 GN=Rps23 PE=1 SV=3	1	2	2	2	0	0	0	0	0	0	1	1	2	0	0	0	0	1	1	2	0	0	0	0	0	0	0	0	0	0	0	0	0	0	1	1	2	0	0	0	0	1
P62849;A0A286YEB7	P62849;A0A286YEB7	3;3	3;3	3;3	40S ribosomal protein S24	Rps24	sp|P62849|RS24_MOUSE 40S ribosomal protein S24 OS=Mus musculus OX=10090 GN=Rps24 PE=1 SV=1;tr|A0A286YEB7|A0A286YEB7_MOUSE 40S ribosomal protein S24 OS=Mus musculus OX=10090 GN=Rps24 PE=1 SV=1	2	3	3	3	0	0	0	0	0	0	2	2	1	0	0	0	0	2	2	0	0	0	0	0	0	0	0	0	0	0	0	0	0	0	2	2	1	0	0	0	0	2
P62852;A0A1L1SQA8	P62852;A0A1L1SQA8	2;2	2;2	2;2	40S ribosomal protein S25	Rps25	sp|P62852|RS25_MOUSE 40S ribosomal protein S25 OS=Mus musculus OX=10090 GN=Rps25 PE=1 SV=1;tr|A0A1L1SQA8|A0A1L1SQA8_MOUSE 40S ribosomal protein S25 OS=Mus musculus OX=10090 GN=Rps25 PE=1 SV=1	2	2	2	2	0	0	0	0	0	0	2	2	1	1	0	0	0	2	2	1	0	0	0	1	0	1	0	0	0	0	0	0	0	0	2	2	1	1	0	0	0	2
P62855	P62855	2	2	2	40S ribosomal protein S26	Rps26	sp|P62855|RS26_MOUSE 40S ribosomal protein S26 OS=Mus musculus OX=10090 GN=Rps26 PE=1 SV=3	1	2	2	2	0	0	0	0	0	0	1	1	1	0	0	0	0	1	1	1	0	0	0	0	0	0	0	0	0	0	0	0	0	0	1	1	1	0	0	0	0	1
P62858;G3UYV7	P62858;G3UYV7	1;1	1;1	1;1	40S ribosomal protein S28	Rps28	sp|P62858|RS28_MOUSE 40S ribosomal protein S28 OS=Mus musculus OX=10090 GN=Rps28 PE=1 SV=1;tr|G3UYV7|G3UYV7_MOUSE 40S ribosomal protein S28 (Fragment) OS=Mus musculus OX=10090 GN=Rps28 PE=1 SV=1	2	1	1	1	0	0	0	0	0	0	1	1	0	0	0	0	0	1	1	0	0	0	0	0	0	0	0	0	0	0	0	0	0	0	1	1	0	0	0	0	0	1
P62908;A0A140LI77;D3YV43	P62908;A0A140LI77;D3YV43	12;6;6	12;6;6	12;6;6	40S ribosomal protein S3	Rps3	sp|P62908|RS3_MOUSE 40S ribosomal protein S3 OS=Mus musculus OX=10090 GN=Rps3 PE=1 SV=1;tr|A0A140LI77|A0A140LI77_MOUSE 40S ribosomal protein S3 OS=Mus musculus OX=10090 GN=Rps3 PE=1 SV=1;tr|D3YV43|D3YV43_MOUSE 40S ribosomal protein S3 OS=Mus musculus OX=10	3	12	12	12	0	0	0	0	0	0	8	8	8	0	0	0	0	8	8	10	0	0	0	0	0	0	0	0	0	0	0	0	0	0	8	8	8	0	0	0	0	8
P97351	P97351	2	2	2	40S ribosomal protein S3a	Rps3a	sp|P97351|RS3A_MOUSE 40S ribosomal protein S3a OS=Mus musculus OX=10090 GN=Rps3a PE=1 SV=3	1	2	2	2	0	0	0	0	0	0	1	2	0	0	0	0	0	2	2	0	0	0	0	0	0	0	0	0	0	0	0	0	0	0	1	2	0	0	0	0	0	2
P62702;V9GWY0	P62702;V9GWY0	6;4	6;4	6;4	40S ribosomal protein S4, X isoform;40S ribosomal protein S4	Rps4x;Gm15013	sp|P62702|RS4X_MOUSE 40S ribosomal protein S4, X isoform OS=Mus musculus OX=10090 GN=Rps4x PE=1 SV=2;tr|V9GWY0|V9GWY0_MOUSE 40S ribosomal protein S4 OS=Mus musculus OX=10090 GN=Gm15013 PE=3 SV=1	2	6	6	6	0	0	0	0	0	0	2	2	6	0	0	0	0	2	1	6	0	0	0	0	0	1	0	0	0	0	0	0	0	0	2	2	6	0	0	0	0	2
P62754	P62754	2	2	2	40S ribosomal protein S6	Rps6	sp|P62754|RS6_MOUSE 40S ribosomal protein S6 OS=Mus musculus OX=10090 GN=Rps6 PE=1 SV=1	1	2	2	2	0	0	0	0	0	0	1	1	2	0	0	0	0	1	1	2	0	0	0	0	0	0	0	0	0	0	0	0	0	0	1	1	2	0	0	0	0	1
P62082	P62082	1	1	1	40S ribosomal protein S7	Rps7	sp|P62082|RS7_MOUSE 40S ribosomal protein S7 OS=Mus musculus OX=10090 GN=Rps7 PE=2 SV=1	1	1	1	1	0	0	1	0	0	0	0	0	0	0	0	0	0	0	0	0	1	1	0	0	1	1	0	0	0	0	1	0	0	0	0	0	0	0	0	0	0	0
P62242	P62242	3	3	3	40S ribosomal protein S8	Rps8	sp|P62242|RS8_MOUSE 40S ribosomal protein S8 OS=Mus musculus OX=10090 GN=Rps8 PE=1 SV=2	1	3	3	3	0	0	0	0	0	0	3	3	2	0	0	0	0	3	3	2	0	0	0	0	0	0	0	0	0	0	0	0	0	0	3	3	2	0	0	0	0	3
Q6ZWN5;F7CJS8;D3YWH9;Q9CXW7;D3YUV6;D3Z673	Q6ZWN5;F7CJS8;D3YWH9;Q9CXW7	3;2;2;2;1;1	3;2;2;2;1;1	3;2;2;2;1;1	40S ribosomal protein S9	Rps9	sp|Q6ZWN5|RS9_MOUSE 40S ribosomal protein S9 OS=Mus musculus OX=10090 GN=Rps9 PE=1 SV=3;tr|F7CJS8|F7CJS8_MOUSE 40S ribosomal protein S9 (Fragment) OS=Mus musculus OX=10090 GN=Rps9 PE=1 SV=1;tr|D3YWH9|D3YWH9_MOUSE 40S ribosomal protein S9 OS=Mus musculus OX	6	3	3	3	0	0	0	0	0	0	3	3	2	0	0	0	0	3	3	2	0	0	0	0	0	0	0	0	0	0	0	0	0	0	3	3	2	0	0	0	0	3
P14206;A0A1L1SUK3;A0A1L1SRW0	P14206;A0A1L1SUK3	5;3;2	5;3;2	5;3;2	40S ribosomal protein SA	Rpsa	sp|P14206|RSSA_MOUSE 40S ribosomal protein SA OS=Mus musculus OX=10090 GN=Rpsa PE=1 SV=4;tr|A0A1L1SUK3|A0A1L1SUK3_MOUSE 40S ribosomal protein SA OS=Mus musculus OX=10090 GN=Rpsa PE=1 SV=1	3	5	5	5	0	0	0	0	0	0	3	3	2	0	0	0	0	4	4	0	0	0	0	0	0	0	0	0	0	0	0	0	0	0	3	3	2	0	0	0	0	4
Q8K0T0	Q8K0T0	2	2	2	Reticulon-1	Rtn1	sp|Q8K0T0|RTN1_MOUSE Reticulon-1 OS=Mus musculus OX=10090 GN=Rtn1 PE=1 SV=1	1	2	2	2	0	0	0	0	0	0	1	1	0	0	0	0	0	0	0	0	0	0	0	0	0	0	0	0	0	0	0	0	0	0	1	1	0	0	0	0	0	0
Q9ES97	Q9ES97	1	1	1	Reticulon-3	Rtn3	sp|Q9ES97|RTN3_MOUSE Reticulon-3 OS=Mus musculus OX=10090 GN=Rtn3 PE=1 SV=2	1	1	1	1	0	0	0	0	0	0	1	1	0	1	0	0	0	1	1	0	0	0	0	0	0	0	0	0	0	0	0	0	0	0	1	1	0	1	0	0	0	1
Q9EP69;A0A5F8MPK9	Q9EP69;A0A5F8MPK9	1;1	1;1	1;1	Phosphatidylinositide phosphatase SAC1	Sacm1l	sp|Q9EP69|SAC1_MOUSE Phosphatidylinositol-3-phosphatase SAC1 OS=Mus musculus OX=10090 GN=Sacm1l PE=1 SV=1;tr|A0A5F8MPK9|A0A5F8MPK9_MOUSE Phosphatidylinositol-3-phosphatase SAC1 OS=Mus musculus OX=10090 GN=Sacm1l PE=1 SV=1	2	1	1	1	0	0	0	0	0	0	0	0	0	0	0	0	0	0	0	0	0	1	1	0	0	0	0	1	0	0	0	0	0	0	0	0	0	0	0	0	0	0
Q8K2B3	Q8K2B3	2	2	2	Succinate dehydrogenase [ubiquinone] flavoprotein subunit, mitochondrial	Sdha	sp|Q8K2B3|SDHA_MOUSE Succinate dehydrogenase [ubiquinone] flavoprotein subunit, mitochondrial OS=Mus musculus OX=10090 GN=Sdha PE=1 SV=1	1	2	2	2	1	0	0	1	1	0	0	0	1	1	0	0	0	0	0	0	0	0	0	0	0	0	0	1	1	0	0	1	1	0	0	0	1	1	0	0	0	0
Q3UJB0	Q3UJB0	1	1	1		Sf3b2	tr|Q3UJB0|Q3UJB0_MOUSE Splicing factor 3b, subunit 2 OS=Mus musculus OX=10090 GN=Sf3b2 PE=1 SV=1	1	1	1	1	0	0	0	0	0	0	1	0	0	0	0	0	0	0	0	0	0	0	0	0	0	0	0	0	0	0	0	0	0	0	1	0	0	0	0	0	0	0
Q921M3	Q921M3	1	1	1	Splicing factor 3B subunit 3	Sf3b3	sp|Q921M3|SF3B3_MOUSE Splicing factor 3B subunit 3 OS=Mus musculus OX=10090 GN=Sf3b3 PE=1 SV=1	1	1	1	1	0	0	0	0	0	0	0	0	1	0	0	0	0	0	0	1	0	0	0	0	0	0	0	0	0	0	0	0	0	0	0	0	1	0	0	0	0	0
Q8VIJ6	Q8VIJ6	13	13	12	Splicing factor, proline- and glutamine-rich	Sfpq	sp|Q8VIJ6|SFPQ_MOUSE Splicing factor, proline- and glutamine-rich OS=Mus musculus OX=10090 GN=Sfpq PE=1 SV=1	1	13	13	12	0	3	3	0	0	0	7	5	11	0	0	0	0	4	5	10	0	0	0	0	0	0	0	0	0	3	3	0	0	0	7	5	11	0	0	0	0	4
Q91V61;Q3U4F0;A0A494BB84	Q91V61;Q3U4F0	3;3;1	3;3;1	3;3;1	Sideroflexin-3	Sfxn3	sp|Q91V61|SFXN3_MOUSE Sideroflexin-3 OS=Mus musculus OX=10090 GN=Sfxn3 PE=1 SV=1;tr|Q3U4F0|Q3U4F0_MOUSE Sideroflexin-3 OS=Mus musculus OX=10090 GN=Sfxn3 PE=1 SV=1	3	3	3	3	0	0	0	0	0	0	3	2	2	0	0	0	0	3	3	2	0	0	0	0	0	0	0	0	0	0	0	0	0	0	3	2	2	0	0	0	0	3
F6VQZ6;Q3UH99	F6VQZ6;Q3UH99	5;4	5;4	5;4	Protein shisa-6 homolog	Shisa6	tr|F6VQZ6|F6VQZ6_MOUSE Protein shisa-6 (Fragment) OS=Mus musculus OX=10090 GN=Shisa6 PE=1 SV=1;sp|Q3UH99|SHSA6_MOUSE Protein shisa-6 OS=Mus musculus OX=10090 GN=Shisa6 PE=1 SV=1	2	5	5	5	0	0	0	3	0	0	0	0	0	3	1	3	0	0	0	0	2	1	1	2	1	1	1	3	0	0	0	3	0	0	0	0	0	3	1	3	0	0
Q9CZN4;E9QN38	Q9CZN4;E9QN38	4;3	4;3	4;3	Protein shisa-9	Shisa9	sp|Q9CZN4|SHSA9_MOUSE Protein shisa-9 OS=Mus musculus OX=10090 GN=Shisa9 PE=1 SV=2;tr|E9QN38|E9QN38_MOUSE Protein shisa-9 OS=Mus musculus OX=10090 GN=Shisa9 PE=1 SV=1	2	4	4	4	0	0	0	2	0	2	0	0	0	0	2	2	1	0	0	0	2	3	2	3	2	1	0	3	0	0	0	2	0	2	0	0	0	0	2	2	1	0
Q8VDQ8;A0A140LHL5	Q8VDQ8;A0A140LHL5	1;1	1;1	1;1	NAD-dependent protein deacetylase sirtuin-2	Sirt2	sp|Q8VDQ8|SIR2_MOUSE NAD-dependent protein deacetylase sirtuin-2 OS=Mus musculus OX=10090 GN=Sirt2 PE=1 SV=2;tr|A0A140LHL5|A0A140LHL5_MOUSE NAD-dependent protein deacetylase OS=Mus musculus OX=10090 GN=Sirt2 PE=1 SV=1	2	1	1	1	0	0	0	0	0	0	0	1	0	0	0	0	0	0	1	0	0	0	0	0	0	0	0	0	0	0	0	0	0	0	0	1	0	0	0	0	0	0
Q91V14;A0A076FR46;Q924N4;Q6P6P5;Q3V0N8;Q9JIS8;A2AGJ9;F8WIJ0	Q91V14;A0A076FR46	5;5;2;2;2;1;1;1	5;5;2;2;2;1;1;1	5;5;2;2;2;1;1;1	Solute carrier family 12 member 5	Slc12a5	sp|Q91V14|S12A5_MOUSE Solute carrier family 12 member 5 OS=Mus musculus OX=10090 GN=Slc12a5 PE=1 SV=2;tr|A0A076FR46|A0A076FR46_MOUSE KCC2a-S25 variant 1 OS=Mus musculus OX=10090 GN=Slc12a5 PE=1 SV=1	8	5	5	5	0	0	0	2	0	0	0	0	2	1	0	3	0	0	1	0	1	2	2	2	0	1	1	1	0	0	0	2	0	0	0	0	2	1	0	3	0	0
Q3TXX4;A0A1B0GRU0	Q3TXX4;A0A1B0GRU0	1;1	1;1	1;1	Vesicular glutamate transporter 1	Slc17a7	sp|Q3TXX4|VGLU1_MOUSE Vesicular glutamate transporter 1 OS=Mus musculus OX=10090 GN=Slc17a7 PE=1 SV=2;tr|A0A1B0GRU0|A0A1B0GRU0_MOUSE Vesicular glutamate transporter 1 OS=Mus musculus OX=10090 GN=Slc17a7 PE=1 SV=1	2	1	1	1	0	0	0	0	0	0	0	1	0	0	0	0	0	1	1	0	0	0	0	0	0	0	0	0	0	0	0	0	0	0	0	1	0	0	0	0	0	1
P43006;A2APL5;F6ZRK3;F7CAM6;A2AQI7	P43006;A2APL5;F6ZRK3;F7CAM6	6;6;3;3;1	6;6;3;3;1	6;6;3;3;1	Excitatory amino acid transporter 2;Amino acid transporter	Slc1a2	sp|P43006|EAA2_MOUSE Excitatory amino acid transporter 2 OS=Mus musculus OX=10090 GN=Slc1a2 PE=1 SV=1;tr|A2APL5|A2APL5_MOUSE Amino acid transporter OS=Mus musculus OX=10090 GN=Slc1a2 PE=1 SV=1;tr|F6ZRK3|F6ZRK3_MOUSE Amino acid transporter (Fragment) OS=Mus	5	6	6	6	2	2	2	5	3	5	2	1	3	5	4	3	2	1	2	2	3	5	3	1	3	4	3	5	2	2	2	5	3	5	2	1	3	5	4	3	2	1
P56564;O35544;D3YY51;A0A1W2P762	P56564	6;1;1;1	6;1;1;1	6;1;1;1	Excitatory amino acid transporter 1	Slc1a3	sp|P56564|EAA1_MOUSE Excitatory amino acid transporter 1 OS=Mus musculus OX=10090 GN=Slc1a3 PE=1 SV=2	4	6	6	6	1	3	3	3	2	4	5	5	3	2	2	4	1	5	5	3	2	3	2	2	2	2	2	2	1	3	3	3	2	4	5	5	3	2	2	4	1	5
Q9CR62;Q5SX46;Q5SX48	Q9CR62;Q5SX46	5;4;2	5;4;2	5;4;2	Mitochondrial 2-oxoglutarate/malate carrier protein	Slc25a11	sp|Q9CR62|M2OM_MOUSE Mitochondrial 2-oxoglutarate/malate carrier protein OS=Mus musculus OX=10090 GN=Slc25a11 PE=1 SV=3;tr|Q5SX46|Q5SX46_MOUSE Mitochondrial 2-oxoglutarate/malate carrier protein (Fragment) OS=Mus musculus OX=10090 GN=Slc25a11 PE=1 SV=1	3	5	5	5	0	0	0	0	0	0	4	4	1	2	0	0	0	4	4	2	0	0	1	0	0	0	1	0	0	0	0	0	0	0	4	4	1	2	0	0	0	4
Q8BH59;V9GXX9	Q8BH59	3;1	3;1	2;1	Calcium-binding mitochondrial carrier protein Aralar1	Slc25a12	sp|Q8BH59|CMC1_MOUSE Calcium-binding mitochondrial carrier protein Aralar1 OS=Mus musculus OX=10090 GN=Slc25a12 PE=1 SV=1	2	3	3	2	0	1	0	0	0	0	1	0	0	0	0	0	0	2	3	0	0	0	0	0	0	0	0	0	0	1	0	0	0	0	1	0	0	0	0	0	0	2
Q9QXX4	Q9QXX4	2	1	1	Calcium-binding mitochondrial carrier protein Aralar2	Slc25a13	sp|Q9QXX4|CMC2_MOUSE Calcium-binding mitochondrial carrier protein Aralar2 OS=Mus musculus OX=10090 GN=Slc25a13 PE=1 SV=1	1	2	1	1	0	1	0	0	0	0	0	0	1	0	0	0	0	1	2	1	0	0	0	0	0	0	0	0	0	0	0	0	0	0	0	0	1	0	0	0	0	0
Q9D6M3;E9PV90;E9PY45;E9Q6M6;Q9DB41;V9GWS2;Q80X52;E9Q579;A0A0J9YTY6;A0A0J9YUX4;A0A0J9YVJ3	Q9D6M3;E9PV90;E9PY45;E9Q6M6;Q9DB41;V9GWS2;Q80X52;E9Q579;A0A0J9YTY6	4;3;3;3;2;2;2;2;2;1;1	4;3;3;3;2;2;2;2;2;1;1	4;3;3;3;2;2;2;2;2;1;1	Mitochondrial glutamate carrier 1;Mitochondrial glutamate carrier 2	Slc25a22;Slc25a18	sp|Q9D6M3|GHC1_MOUSE Mitochondrial glutamate carrier 1 OS=Mus musculus OX=10090 GN=Slc25a22 PE=1 SV=1;tr|E9PV90|E9PV90_MOUSE Mitochondrial glutamate carrier 1 (Fragment) OS=Mus musculus OX=10090 GN=Slc25a22 PE=1 SV=1;tr|E9PY45|E9PY45_MOUSE Mitochondrial gl	11	4	4	4	0	0	0	0	0	0	2	2	2	0	0	1	0	2	2	2	0	0	0	0	0	0	0	0	0	0	0	0	0	0	2	2	2	0	0	1	0	2
Q8VEM8;G5E902	Q8VEM8;G5E902	6;6	6;6	6;6	Phosphate carrier protein, mitochondrial	Slc25a3	sp|Q8VEM8|MPCP_MOUSE Phosphate carrier protein, mitochondrial OS=Mus musculus OX=10090 GN=Slc25a3 PE=1 SV=1;tr|G5E902|G5E902_MOUSE Phosphate carrier protein, mitochondrial OS=Mus musculus OX=10090 GN=Slc25a3 PE=1 SV=1	2	6	6	6	3	2	0	3	0	2	4	4	3	4	2	1	1	4	4	3	3	2	1	2	2	2	0	1	3	2	0	3	0	2	4	4	3	4	2	1	1	4
P48962;Q3V132	P48962	8;1	8;1	5;0	ADP/ATP translocase 1	Slc25a4	sp|P48962|ADT1_MOUSE ADP/ATP translocase 1 OS=Mus musculus OX=10090 GN=Slc25a4 PE=1 SV=4	2	8	8	5	4	6	5	4	4	2	6	7	3	6	6	4	3	7	7	4	5	6	4	6	6	6	3	3	4	6	5	4	4	2	6	7	3	6	6	4	3	7
P51881	P51881	6	3	3	ADP/ATP translocase 2;ADP/ATP translocase 2, N-terminally processed	Slc25a5	sp|P51881|ADT2_MOUSE ADP/ATP translocase 2 OS=Mus musculus OX=10090 GN=Slc25a5 PE=1 SV=3	1	6	3	3	3	4	3	4	2	2	4	4	4	4	5	3	3	4	4	5	4	4	3	4	3	5	3	2	2	2	2	2	1	1	2	2	3	2	2	2	1	2
F8WGV3	F8WGV3	1	1	1		Slc26a10	tr|F8WGV3|F8WGV3_MOUSE Solute carrier family 26 member 10 OS=Mus musculus OX=10090 GN=Slc26a10 PE=3 SV=1	1	1	1	1	0	0	0	0	0	0	0	0	0	1	0	0	0	0	0	0	0	0	0	0	0	0	0	0	0	0	0	0	0	0	0	0	0	1	0	0	0	0
O88343;E9Q8N8;A7E1Z5;A0A668KM61;Q5DTL9;Q8JZR6;D3Z7G8	O88343;E9Q8N8;A7E1Z5;A0A668KM61	3;3;3;3;1;1;1	3;3;3;3;1;1;1	3;3;3;3;1;1;1	Electrogenic sodium bicarbonate cotransporter 1;Anion exchange protein	Slc4a4	sp|O88343|S4A4_MOUSE Electrogenic sodium bicarbonate cotransporter 1 OS=Mus musculus OX=10090 GN=Slc4a4 PE=1 SV=2;tr|E9Q8N8|E9Q8N8_MOUSE Anion exchange protein OS=Mus musculus OX=10090 GN=Slc4a4 PE=1 SV=1;tr|A7E1Z5|A7E1Z5_MOUSE Anion exchange protein OS=Mu	7	3	3	3	0	0	0	0	0	0	1	0	1	0	0	0	0	2	2	1	0	0	0	0	0	0	0	0	0	0	0	0	0	0	1	0	1	0	0	0	0	2
P31648	P31648	1	1	1	Sodium- and chloride-dependent GABA transporter 1	Slc6a1	sp|P31648|SC6A1_MOUSE Sodium- and chloride-dependent GABA transporter 1 OS=Mus musculus OX=10090 GN=Slc6a1 PE=1 SV=2	1	1	1	1	0	0	0	0	0	0	0	1	0	0	0	0	0	0	0	0	0	0	0	0	0	0	0	0	0	0	0	0	0	0	0	1	0	0	0	0	0	0
Q8BXR1;D3YY38	Q8BXR1;D3YY38	1;1	1;1	1;1	Probable cationic amino acid transporter	Slc7a14	sp|Q8BXR1|S7A14_MOUSE Probable cationic amino acid transporter OS=Mus musculus OX=10090 GN=Slc7a14 PE=1 SV=1;tr|D3YY38|D3YY38_MOUSE Probable cationic amino acid transporter OS=Mus musculus OX=10090 GN=Slc7a14 PE=1 SV=1	2	1	1	1	0	0	0	0	0	0	1	0	1	0	0	0	0	1	1	0	0	0	0	0	0	0	0	0	0	0	0	0	0	0	1	0	1	0	0	0	0	1
Q7TN29	Q7TN29	4	4	4	Stromal membrane-associated protein 2	Smap2	sp|Q7TN29|SMAP2_MOUSE Stromal membrane-associated protein 2 OS=Mus musculus OX=10090 GN=Smap2 PE=1 SV=1	1	4	4	4	0	0	0	3	3	2	0	0	0	3	4	2	3	0	1	0	0	0	0	0	3	2	3	3	0	0	0	3	3	2	0	0	0	3	4	2	3	0
P60879	P60879	4	4	4	Synaptosomal-associated protein 25	Snap25	sp|P60879|SNP25_MOUSE Synaptosomal-associated protein 25 OS=Mus musculus OX=10090 GN=Snap25 PE=1 SV=1	1	4	4	4	1	1	0	1	0	0	1	2	1	3	0	0	0	1	2	1	1	1	0	0	1	1	0	0	1	1	0	1	0	0	1	2	1	3	0	0	0	1
Q61548;Q7M6Y3;A0A140LHG9;A0A087WSI9;Q3TWS4;E9Q9A3;E9QQ05;A0A5F8MPL3;E9QLK9	Q61548;Q7M6Y3;A0A140LHG9;A0A087WSI9;Q3TWS4;E9Q9A3;E9QQ05;A0A5F8MPL3;E9QLK9	1;1;1;1;1;1;1;1;1	1;1;1;1;1;1;1;1;1	1;1;1;1;1;1;1;1;1	Clathrin coat assembly protein AP180;Phosphatidylinositol-binding clathrin assembly protein	Snap91;Picalm	sp|Q61548|AP180_MOUSE Clathrin coat assembly protein AP180 OS=Mus musculus OX=10090 GN=Snap91 PE=1 SV=1;sp|Q7M6Y3|PICAL_MOUSE Phosphatidylinositol-binding clathrin assembly protein OS=Mus musculus OX=10090 GN=Picalm PE=1 SV=1;tr|A0A140LHG9|A0A140LHG9_MOUSE	9	1	1	1	0	0	0	1	0	0	0	0	0	0	0	0	1	0	0	0	0	0	0	0	0	0	0	0	0	0	0	1	0	0	0	0	0	0	0	0	1	0
P62320	P62320	1	1	1	Small nuclear ribonucleoprotein Sm D3	Snrpd3	sp|P62320|SMD3_MOUSE Small nuclear ribonucleoprotein Sm D3 OS=Mus musculus OX=10090 GN=Snrpd3 PE=1 SV=1	1	1	1	1	0	0	0	0	0	0	1	1	1	0	0	0	0	1	1	1	0	0	0	0	0	0	0	0	0	0	0	0	0	0	1	1	1	0	0	0	0	1
P09671;A0A3B2WBF0	P09671;A0A3B2WBF0	1;1	1;1	1;1	Superoxide dismutase [Mn], mitochondrial	Sod2	sp|P09671|SODM_MOUSE Superoxide dismutase [Mn], mitochondrial OS=Mus musculus OX=10090 GN=Sod2 PE=1 SV=3;tr|A0A3B2WBF0|A0A3B2WBF0_MOUSE Superoxide dismutase OS=Mus musculus OX=10090 GN=Sod2 PE=1 SV=1	2	1	1	1	0	0	0	0	0	0	0	0	0	1	0	0	0	0	0	0	0	0	0	0	0	0	0	0	0	0	0	0	0	0	0	0	0	1	0	0	0	0
P16546;E9Q447;A3KGU5;A3KGU7;A3KGU9;A3KGU4	P16546;E9Q447;A3KGU5;A3KGU7;A3KGU9	4;4;4;4;4;1	4;4;4;4;4;1	4;4;4;4;4;1	Spectrin alpha chain, non-erythrocytic 1	Sptan1	sp|P16546|SPTN1_MOUSE Spectrin alpha chain, non-erythrocytic 1 OS=Mus musculus OX=10090 GN=Sptan1 PE=1 SV=4;tr|E9Q447|E9Q447_MOUSE Spectrin alpha chain, non-erythrocytic 1 OS=Mus musculus OX=10090 GN=Sptan1 PE=1 SV=1;tr|A3KGU5|A3KGU5_MOUSE Spectrin alpha c	6	4	4	4	0	0	0	2	0	0	1	1	1	0	0	0	1	1	1	0	0	0	2	2	0	1	0	0	0	0	0	2	0	0	1	1	1	0	0	0	1	1
Q62261;A0A0A0MQG2	Q62261;A0A0A0MQG2	1;1	1;1	1;1	Spectrin beta chain, non-erythrocytic 1	Sptbn1	sp|Q62261|SPTB2_MOUSE Spectrin beta chain, non-erythrocytic 1 OS=Mus musculus OX=10090 GN=Sptbn1 PE=1 SV=2;tr|A0A0A0MQG2|A0A0A0MQG2_MOUSE Spectrin beta chain, non-erythrocytic 1 (Fragment) OS=Mus musculus OX=10090 GN=Sptbn1 PE=1 SV=1	2	1	1	1	0	0	0	0	0	0	1	1	0	0	0	0	0	0	1	0	0	0	0	0	0	0	0	0	0	0	0	0	0	0	1	1	0	0	0	0	0	0
B1AQX7;B1AQX9;A0A571BG20;B1AQX6;A0A571BDG6;A0A571BDG0;A0A571BG39;Q9QWI6;B1AQX8	B1AQX7;B1AQX9;A0A571BG20;B1AQX6;A0A571BDG6;A0A571BDG0;A0A571BG39;Q9QWI6	5;5;5;5;5;5;5;4;2	5;5;5;5;5;5;5;4;2	5;5;5;5;5;5;5;4;2	SRC kinase signaling inhibitor 1	Srcin1	tr|B1AQX7|B1AQX7_MOUSE SRC kinase-signaling inhibitor 1 OS=Mus musculus OX=10090 GN=Srcin1 PE=1 SV=1;tr|B1AQX9|B1AQX9_MOUSE SRC kinase-signaling inhibitor 1 OS=Mus musculus OX=10090 GN=Srcin1 PE=1 SV=1;tr|A0A571BG20|A0A571BG20_MOUSE SRC kinase-signaling in	9	5	5	5	1	0	0	1	0	1	0	2	2	0	0	0	0	0	0	0	0	0	0	0	1	0	0	1	1	0	0	1	0	1	0	2	2	0	0	0	0	0
O35526;D6RFB9	O35526;D6RFB9	1;1	1;1	1;1	Syntaxin-1A	Stx1a	sp|O35526|STX1A_MOUSE Syntaxin-1A OS=Mus musculus OX=10090 GN=Stx1a PE=1 SV=3;tr|D6RFB9|D6RFB9_MOUSE Syntaxin-1A OS=Mus musculus OX=10090 GN=Stx1a PE=1 SV=1	2	1	1	1	0	0	0	0	0	0	1	1	0	0	0	0	0	0	1	0	0	0	0	0	0	0	0	0	0	0	0	0	0	0	1	1	0	0	0	0	0	0
P61264;A0A0U1RNT8	P61264;A0A0U1RNT8	5;3	5;3	5;3	Syntaxin-1B	Stx1b	sp|P61264|STX1B_MOUSE Syntaxin-1B OS=Mus musculus OX=10090 GN=Stx1b PE=1 SV=1;tr|A0A0U1RNT8|A0A0U1RNT8_MOUSE Syntaxin-1B (Fragment) OS=Mus musculus OX=10090 GN=Stx1b PE=1 SV=1	2	5	5	5	0	0	1	2	0	0	4	4	2	2	1	1	0	4	4	2	1	1	0	2	2	1	0	0	0	0	1	2	0	0	4	4	2	2	1	1	0	4
O08599;A0A140LHJ4	O08599	11;1	11;1	11;1	Syntaxin-binding protein 1	Stxbp1	sp|O08599|STXB1_MOUSE Syntaxin-binding protein 1 OS=Mus musculus OX=10090 GN=Stxbp1 PE=1 SV=2	2	11	11	11	1	0	0	1	0	0	1	5	1	1	0	0	0	1	7	1	0	0	0	0	1	0	0	0	1	0	0	1	0	0	1	5	1	1	0	0	0	1
Q9WUM5	Q9WUM5	2	2	2	Succinyl-CoA ligase [ADP/GDP-forming] subunit alpha, mitochondrial	Suclg1	sp|Q9WUM5|SUCA_MOUSE Succinate--CoA ligase [ADP/GDP-forming] subunit alpha, mitochondrial OS=Mus musculus OX=10090 GN=Suclg1 PE=1 SV=4	1	2	2	2	0	0	0	1	0	0	0	0	1	0	0	0	0	0	0	1	0	0	0	0	0	1	0	1	0	0	0	1	0	0	0	0	1	0	0	0	0	0
O88935	O88935	13	13	12	Synapsin-1	Syn1	sp|O88935|SYN1_MOUSE Synapsin-1 OS=Mus musculus OX=10090 GN=Syn1 PE=1 SV=2	1	13	13	12	3	3	2	6	1	2	4	5	5	6	2	3	2	1	7	3	5	1	2	2	3	2	0	5	3	3	2	6	1	2	4	5	5	6	2	3	2	1
Q64332	Q64332	6	5	5	Synapsin-2	Syn2	sp|Q64332|SYN2_MOUSE Synapsin-2 OS=Mus musculus OX=10090 GN=Syn2 PE=1 SV=2	1	6	5	5	1	0	1	1	0	2	6	6	3	1	0	0	0	6	6	1	1	2	0	0	1	1	0	2	1	0	1	1	0	2	5	5	2	1	0	0	0	5
Q7TMK9;G3UXJ6;G3UZ48;G3UZI2;A0A0R4J259;G3V018	Q7TMK9;G3UXJ6;G3UZ48;G3UZI2;A0A0R4J259;G3V018	1;1;1;1;1;1	1;1;1;1;1;1	1;1;1;1;1;1	Heterogeneous nuclear ribonucleoprotein Q	Syncrip	sp|Q7TMK9|HNRPQ_MOUSE Heterogeneous nuclear ribonucleoprotein Q OS=Mus musculus OX=10090 GN=Syncrip PE=1 SV=2;tr|G3UXJ6|G3UXJ6_MOUSE Heterogeneous nuclear ribonucleoprotein Q OS=Mus musculus OX=10090 GN=Syncrip PE=1 SV=1;tr|G3UZ48|G3UZ48_MOUSE Heterogeneou	6	1	1	1	0	0	0	0	0	0	1	0	0	0	0	0	0	0	0	0	0	0	0	0	0	0	0	0	0	0	0	0	0	0	1	0	0	0	0	0	0	0
F6SEU4;A0A338P799;A0A2R8VH83;A0A140T8K9;A0A0A6YVS6;A0A0J9YVH8;A0A0J9YUM2;A0A2R8VHH2;J3QQ18	F6SEU4;A0A338P799;A0A2R8VH83;A0A140T8K9;A0A0A6YVS6;A0A0J9YVH8;A0A0J9YUM2;A0A2R8VHH2;J3QQ18	3;3;3;3;3;3;3;3;3	3;3;3;3;3;3;3;3;3	3;3;3;3;3;3;3;3;3	Ras/Rap GTPase-activating protein SynGAP	Syngap1	sp|F6SEU4|SYGP1_MOUSE Ras/Rap GTPase-activating protein SynGAP OS=Mus musculus OX=10090 GN=Syngap1 PE=1 SV=2;tr|A0A338P799|A0A338P799_MOUSE Ras/Rap GTPase-activating protein SynGAP OS=Mus musculus OX=10090 GN=Syngap1 PE=1 SV=1;tr|A0A2R8VH83|A0A2R8VH83_MOUS	9	3	3	3	0	0	0	0	0	0	2	1	1	0	0	0	0	0	0	0	0	0	0	0	0	0	0	0	0	0	0	0	0	0	2	1	1	0	0	0	0	0
Q8R191	Q8R191	1	1	1	Synaptogyrin-3	Syngr3	sp|Q8R191|SNG3_MOUSE Synaptogyrin-3 OS=Mus musculus OX=10090 GN=Syngr3 PE=1 SV=1	1	1	1	1	1	0	0	1	1	0	1	1	1	1	1	1	1	1	1	1	1	1	1	1	1	1	1	1	1	0	0	1	1	0	1	1	1	1	1	1	1	1
Q8CHC4;D3Z656;D3Z1M7;E9Q7S0;F7BQW7	Q8CHC4;D3Z656;D3Z1M7;E9Q7S0;F7BQW7	2;2;2;2;2	2;2;2;2;2	2;2;2;2;2	Synaptojanin-1	Synj1	sp|Q8CHC4|SYNJ1_MOUSE Synaptojanin-1 OS=Mus musculus OX=10090 GN=Synj1 PE=1 SV=3;tr|D3Z656|D3Z656_MOUSE Phosphoinositide 5-phosphatase OS=Mus musculus OX=10090 GN=Synj1 PE=1 SV=1;tr|D3Z1M7|D3Z1M7_MOUSE Phosphoinositide 5-phosphatase (Fragment) OS=Mus muscu	5	2	2	2	0	0	0	0	0	0	0	1	0	0	0	0	0	1	0	0	0	0	0	0	0	0	0	0	0	0	0	0	0	0	0	1	0	0	0	0	0	1
P46096;P46097;Q9R0N5;A0A0R4J2C2	P46096	8;1;1;1	8;1;1;1	8;1;1;1	Synaptotagmin-1	Syt1	sp|P46096|SYT1_MOUSE Synaptotagmin-1 OS=Mus musculus OX=10090 GN=Syt1 PE=1 SV=1	4	8	8	8	3	5	6	4	2	2	5	7	4	3	1	0	2	5	5	5	1	5	1	2	2	3	1	2	3	5	6	4	2	2	5	7	4	3	1	0	2	5
Q8BYC6;Q3V3K3	Q8BYC6;Q3V3K3	1;1	1;1	1;1	Serine/threonine-protein kinase TAO3	Taok3	sp|Q8BYC6|TAOK3_MOUSE Serine/threonine-protein kinase TAO3 OS=Mus musculus OX=10090 GN=Taok3 PE=1 SV=2;tr|Q3V3K3|Q3V3K3_MOUSE Serine/threonine-protein kinase TAO3 OS=Mus musculus OX=10090 GN=Taok3 PE=1 SV=1	2	1	1	1	0	0	0	0	0	0	0	0	0	1	0	0	0	0	0	0	0	0	0	0	0	0	0	0	0	0	0	0	0	0	0	0	0	1	0	0	0	0
Q9Z1A1;F6QJV5;B8JJG8;B8JJG7;B8JJG9	Q9Z1A1;F6QJV5;B8JJG8	12;8;6;5;3	12;8;6;5;3	12;8;6;5;3		Tfg	tr|Q9Z1A1|Q9Z1A1_MOUSE TFG protein OS=Mus musculus OX=10090 GN=Tfg PE=1 SV=1;tr|F6QJV5|F6QJV5_MOUSE Trk-fused gene (Fragment) OS=Mus musculus OX=10090 GN=Tfg PE=1 SV=1;tr|B8JJG8|B8JJG8_MOUSE Trk-fused gene (Fragment) OS=Mus musculus OX=10090 GN=Tfg PE=1 SV	5	12	12	12	0	0	0	0	0	0	10	10	10	0	0	0	0	11	10	10	0	0	0	0	0	0	0	0	0	0	0	0	0	0	10	10	10	0	0	0	0	11
P01831;A0A1L1SUX8	P01831;A0A1L1SUX8	1;1	1;1	1;1	Thy-1 membrane glycoprotein	Thy1	sp|P01831|THY1_MOUSE Thy-1 membrane glycoprotein OS=Mus musculus OX=10090 GN=Thy1 PE=1 SV=1;tr|A0A1L1SUX8|A0A1L1SUX8_MOUSE Thy-1 antigen (Fragment) OS=Mus musculus OX=10090 GN=Thy1 PE=1 SV=1	2	1	1	1	1	0	0	0	0	0	1	1	1	1	0	0	0	1	1	0	1	0	0	0	1	0	0	0	1	0	0	0	0	0	1	1	1	1	0	0	0	1
A2ARJ3	A2ARJ3	1	1	1	Transmembrane protein 236	Tmem236	sp|A2ARJ3|TM236_MOUSE Transmembrane protein 236 OS=Mus musculus OX=10090 GN=Tmem236 PE=3 SV=1	1	1	1	1	0	0	0	0	0	0	0	0	1	0	0	0	0	0	0	0	0	0	0	0	1	0	0	0	0	0	0	0	0	0	0	0	1	0	0	0	0	0
Q9CZW5	Q9CZW5	1	1	1	Mitochondrial import receptor subunit TOM70	Tomm70a	sp|Q9CZW5|TOM70_MOUSE Mitochondrial import receptor subunit TOM70 OS=Mus musculus OX=10090 GN=Tomm70 PE=1 SV=2	1	1	1	1	0	0	0	0	0	0	0	0	0	0	0	0	0	0	1	0	0	0	0	0	0	0	0	0	0	0	0	0	0	0	0	0	0	0	0	0	0	0
P17751;H7BXC3	P17751;H7BXC3	1;1	1;1	1;1	Triosephosphate isomerase	Tpi1	sp|P17751|TPIS_MOUSE Triosephosphate isomerase OS=Mus musculus OX=10090 GN=Tpi1 PE=1 SV=5;tr|H7BXC3|H7BXC3_MOUSE Triosephosphate isomerase OS=Mus musculus OX=10090 GN=Tpi1 PE=1 SV=1	2	1	1	1	0	0	0	0	0	0	0	1	0	0	0	0	0	1	1	0	0	0	0	0	0	0	0	0	0	0	0	0	0	0	0	1	0	0	0	0	0	1
Q7TQD2	Q7TQD2	2	2	2	Tubulin polymerization-promoting protein	Tppp	sp|Q7TQD2|TPPP_MOUSE Tubulin polymerization-promoting protein OS=Mus musculus OX=10090 GN=Tppp PE=1 SV=1	1	2	2	2	0	0	0	1	0	0	0	1	0	1	1	1	0	0	0	0	0	0	0	0	1	1	0	0	0	0	0	1	0	0	0	1	0	1	1	1	0	0
Q8R4D5	Q8R4D5	1	1	1	Transient receptor potential cation channel subfamily M member 8	Trpm8	sp|Q8R4D5|TRPM8_MOUSE Transient receptor potential cation channel subfamily M member 8 OS=Mus musculus OX=10090 GN=Trpm8 PE=1 SV=3	1	1	1	1	0	0	0	0	0	0	0	0	1	0	0	0	0	0	0	1	0	0	0	0	0	0	0	0	0	0	0	0	0	0	0	0	1	0	0	0	0	0
Q792Z1	Q792Z1	1	1	1		Try10	tr|Q792Z1|Q792Z1_MOUSE Trypsin 10 OS=Mus musculus OX=10090 GN=Try10 PE=1 SV=1	1	1	1	1	0	0	0	0	0	0	1	0	0	0	0	0	0	0	0	0	0	0	0	0	0	0	0	0	0	0	0	0	0	0	1	0	0	0	0	0	0	0
Q9R0T7;Q9QUK9	Q9R0T7;Q9QUK9	1;1	1;1	1;1		Try4;Try5	tr|Q9R0T7|Q9R0T7_MOUSE Pancreatic trypsin OS=Mus musculus OX=10090 GN=Try4 PE=1 SV=1;tr|Q9QUK9|Q9QUK9_MOUSE TESP4 OS=Mus musculus OX=10090 GN=Try5 PE=1 SV=1	2	1	1	1	0	0	0	0	0	0	1	1	0	0	0	0	0	1	1	0	0	0	0	0	0	0	0	0	0	0	0	0	0	0	1	1	0	0	0	0	0	1
E9PVB5;A2AFY7	E9PVB5;A2AFY7	1;1	1;1	1;1	Tetratricopeptide repeat protein 17	Ttc17	sp|E9PVB5|TTC17_MOUSE Tetratricopeptide repeat protein 17 OS=Mus musculus OX=10090 GN=Ttc17 PE=1 SV=1;tr|A2AFY7|A2AFY7_MOUSE Tetratricopeptide repeat protein 17 OS=Mus musculus OX=10090 GN=Ttc17 PE=1 SV=1	2	1	1	1	0	1	0	1	0	0	0	0	1	0	0	1	0	0	0	1	0	0	0	0	0	0	1	0	0	1	0	1	0	0	0	0	1	0	0	1	0	0
P68369;P05214	P68369;P05214	13;11	1;1	1;1	Tubulin alpha-1A chain;Tubulin alpha-3 chain	Tuba1a;Tuba3a	sp|P68369|TBA1A_MOUSE Tubulin alpha-1A chain OS=Mus musculus OX=10090 GN=Tuba1a PE=1 SV=1;sp|P05214|TBA3_MOUSE Tubulin alpha-3 chain OS=Mus musculus OX=10090 GN=Tuba3a PE=1 SV=1	2	13	1	1	7	5	6	9	10	11	11	10	7	8	9	9	8	11	11	6	6	7	7	7	9	9	11	6	1	0	1	1	1	1	0	0	0	1	1	1	1	0
P05213;P68373;A0A2R8VHF3	P05213;P68373;A0A2R8VHF3	13;13;9	13;13;9	0;0;0	Tubulin alpha-1B chain;Tubulin alpha-1C chain	Tuba1b;Tuba1c	sp|P05213|TBA1B_MOUSE Tubulin alpha-1B chain OS=Mus musculus OX=10090 GN=Tuba1b PE=1 SV=2;sp|P68373|TBA1C_MOUSE Tubulin alpha-1C chain OS=Mus musculus OX=10090 GN=Tuba1c PE=1 SV=1;tr|A0A2R8VHF3|A0A2R8VHF3_MOUSE Tubulin alpha chain (Fragment) OS=Mus musculu	3	13	13	0	6	5	6	9	10	11	11	10	7	8	9	9	7	11	11	7	6	7	6	7	9	9	11	6	6	5	6	9	10	11	11	10	7	8	9	9	7	11
P68368;A0A0A0MQA5;Q9JJZ2;A0A087WRB4;A0A087WQS4;A0A087WSB0;A0A087WSL5;Q3UX10	P68368;A0A0A0MQA5;Q9JJZ2	10;10;8;3;3;2;2;1	1;1;0;1;1;1;1;0	1;1;0;1;1;1;1;0	Tubulin alpha-4A chain;Tubulin alpha-8 chain	Tuba4a;Tuba8	sp|P68368|TBA4A_MOUSE Tubulin alpha-4A chain OS=Mus musculus OX=10090 GN=Tuba4a PE=1 SV=1;tr|A0A0A0MQA5|A0A0A0MQA5_MOUSE Tubulin alpha chain (Fragment) OS=Mus musculus OX=10090 GN=Tuba4a PE=1 SV=1;sp|Q9JJZ2|TBA8_MOUSE Tubulin alpha-8 chain OS=Mus musculus	8	10	1	1	3	2	3	6	7	7	7	8	4	5	7	6	4	8	8	5	4	3	3	4	5	5	8	5	0	0	0	1	1	0	0	1	0	0	1	1	0	1
Q7TMM9;Q9CWF2	Q7TMM9;Q9CWF2	20;19	20;19	4;3	Tubulin beta-2A chain;Tubulin beta-2B chain	Tubb2a;Tubb2b	sp|Q7TMM9|TBB2A_MOUSE Tubulin beta-2A chain OS=Mus musculus OX=10090 GN=Tubb2a PE=1 SV=1;sp|Q9CWF2|TBB2B_MOUSE Tubulin beta-2B chain OS=Mus musculus OX=10090 GN=Tubb2b PE=1 SV=1	2	20	20	4	6	5	5	9	12	13	15	15	11	8	12	12	9	15	16	12	5	9	8	6	9	11	9	11	6	5	5	9	12	13	15	15	11	8	12	12	9	15
Q9ERD7	Q9ERD7	13	2	1	Tubulin beta-3 chain	Tubb3	sp|Q9ERD7|TBB3_MOUSE Tubulin beta-3 chain OS=Mus musculus OX=10090 GN=Tubb3 PE=1 SV=1	1	13	2	1	4	3	2	7	8	9	11	11	7	6	7	9	8	11	11	7	3	5	4	4	6	8	6	7	0	0	0	1	1	2	1	1	0	0	0	1	1	1
Q9D6F9	Q9D6F9	14	3	3	Tubulin beta-4A chain	Tubb4a	sp|Q9D6F9|TBB4A_MOUSE Tubulin beta-4A chain OS=Mus musculus OX=10090 GN=Tubb4a PE=1 SV=3	1	14	3	3	2	3	2	6	9	7	12	12	10	5	6	7	5	12	11	9	1	4	3	2	5	6	5	6	0	0	0	2	1	1	2	2	1	1	0	1	1	2
P68372;A2AQ07;CON__ENSEMBL:ENSBTAP00000025008;G3UZR1	P68372	18;3;3;2	5;0;0;0	1;0;0;0	Tubulin beta-4B chain	Tubb4b	sp|P68372|TBB4B_MOUSE Tubulin beta-4B chain OS=Mus musculus OX=10090 GN=Tubb4b PE=1 SV=1	4	18	5	1	3	3	2	6	11	9	16	15	12	5	10	9	6	16	16	12	3	6	5	3	5	11	6	8	0	1	0	1	4	1	5	5	5	1	3	1	1	5
P99024;A0A1D5RM76	P99024	17;1	3;0	3;0	Tubulin beta-5 chain	Tubb5	sp|P99024|TBB5_MOUSE Tubulin beta-5 chain OS=Mus musculus OX=10090 GN=Tubb5 PE=1 SV=1	2	17	3	3	4	4	3	7	9	10	15	14	11	6	9	10	7	15	15	11	4	6	5	4	6	10	7	8	0	0	0	0	0	0	2	2	1	0	0	0	0	2
Q922F4	Q922F4	11	1	1	Tubulin beta-6 chain	Tubb6	sp|Q922F4|TBB6_MOUSE Tubulin beta-6 chain OS=Mus musculus OX=10090 GN=Tubb6 PE=1 SV=1	1	11	1	1	4	1	1	5	4	5	9	8	4	4	5	6	5	8	8	4	2	4	2	3	5	5	3	5	0	0	0	1	0	0	1	0	0	0	0	1	0	0
P0CG50;P0CG49;P62983;P62984;A0A0A6YW67;E9Q9J0;E9Q4P0;E9Q5F6;E9QNP0;Q5SX22	P0CG50;P0CG49;P62983;P62984;A0A0A6YW67;E9Q9J0;E9Q4P0;E9Q5F6;E9QNP0;Q5SX22	4;4;4;4;4;4;4;4;4;4	4;4;4;4;4;4;4;4;4;4	4;4;4;4;4;4;4;4;4;4	Polyubiquitin-C;Ubiquitin;Ubiquitin-related 1;Ubiquitin-related 2;Polyubiquitin-B;Ubiquitin;Ubiquitin-40S ribosomal protein S27a;Ubiquitin;40S ribosomal protein S27a;Ubiquitin-60S ribosomal protein L40;Ubiquitin;60S ribosomal protein L40	Ubc;Ubb;Rps27a;Uba52;Gm8797;Kxd1	sp|P0CG50|UBC_MOUSE Polyubiquitin-C OS=Mus musculus OX=10090 GN=Ubc PE=1 SV=2;sp|P0CG49|UBB_MOUSE Polyubiquitin-B OS=Mus musculus OX=10090 GN=Ubb PE=2 SV=1;sp|P62983|RS27A_MOUSE Ubiquitin-40S ribosomal protein S27a OS=Mus musculus OX=10090 GN=Rps27a PE=1 S	10	4	4	4	0	0	0	0	1	0	1	2	4	1	1	0	1	1	2	2	0	0	0	0	0	0	0	0	0	0	0	0	1	0	1	2	4	1	1	0	1	1
Q9R0P9	Q9R0P9	1	1	1	Ubiquitin carboxyl-terminal hydrolase isozyme L1	Uchl1	sp|Q9R0P9|UCHL1_MOUSE Ubiquitin carboxyl-terminal hydrolase isozyme L1 OS=Mus musculus OX=10090 GN=Uchl1 PE=1 SV=1	1	1	1	1	0	0	0	0	0	0	1	1	0	0	0	0	0	1	1	0	0	0	0	0	0	0	0	0	0	0	0	0	0	0	1	1	0	0	0	0	0	1
Q99K23	Q99K23	1	1	1	Ufm1-specific protease 2	Ufsp2	sp|Q99K23|UFSP2_MOUSE Ufm1-specific protease 2 OS=Mus musculus OX=10090 GN=Ufsp2 PE=1 SV=1	1	1	1	1	0	0	0	1	1	0	0	0	0	0	1	0	1	0	0	0	0	0	0	0	0	0	1	0	0	0	0	1	1	0	0	0	0	0	1	0	1	0
Q8CGR7;A0A2R8W6J9;Q8R093	Q8CGR7;A0A2R8W6J9;Q8R093	1;1;1	1;1;1	1;1;1	Uridine phosphorylase 2;Uridine phosphorylase	Upp2	sp|Q8CGR7|UPP2_MOUSE Uridine phosphorylase 2 OS=Mus musculus OX=10090 GN=Upp2 PE=1 SV=1;tr|A0A2R8W6J9|A0A2R8W6J9_MOUSE Uridine phosphorylase OS=Mus musculus OX=10090 GN=Upp2 PE=1 SV=1;tr|Q8R093|Q8R093_MOUSE Uridine phosphorylase OS=Mus musculus OX=10090 GN	3	1	1	1	0	0	0	0	0	0	0	0	0	0	0	0	0	0	0	1	0	0	0	0	0	0	0	0	0	0	0	0	0	0	0	0	0	0	0	0	0	0
Q9CWU6;F6V305;A6PWX9;D6RJ83;A6PWX5;A6PWX7;A6PWX8	Q9CWU6;F6V305;A6PWX9;D6RJ83;A6PWX5;A6PWX7;A6PWX8	2;2;2;1;1;1;1	2;2;2;1;1;1;1	2;2;2;1;1;1;1	Ubiquinol-cytochrome-c reductase complex assembly factor 1	Uqcc1	sp|Q9CWU6|UQCC1_MOUSE Ubiquinol-cytochrome-c reductase complex assembly factor 1 OS=Mus musculus OX=10090 GN=Uqcc1 PE=1 SV=1;tr|F6V305|F6V305_MOUSE Ubiquinol-cytochrome-c reductase complex assembly factor 1 (Fragment) OS=Mus musculus OX=10090 GN=Uqcc1 PE=1	7	2	2	2	0	0	0	0	0	0	2	2	1	0	0	0	0	2	2	1	0	0	0	0	0	0	0	0	0	0	0	0	0	0	2	2	1	0	0	0	0	2
D3Z4D6;D3Z4C9;Q9CQY6	D3Z4D6;D3Z4C9;Q9CQY6	1;1;1	1;1;1	1;1;1	Ubiquinol-cytochrome-c reductase complex assembly factor 2	Uqcc2	tr|D3Z4D6|D3Z4D6_MOUSE Mitochondrial nucleoid factor 1 OS=Mus musculus OX=10090 GN=Uqcc2 PE=1 SV=1;tr|D3Z4C9|D3Z4C9_MOUSE Mitochondrial nucleoid factor 1 OS=Mus musculus OX=10090 GN=Uqcc2 PE=1 SV=1;sp|Q9CQY6|UQCC2_MOUSE Ubiquinol-cytochrome-c reductase com	3	1	1	1	0	0	0	0	0	0	1	1	0	0	0	0	0	1	0	0	0	0	0	0	0	0	0	0	0	0	0	0	0	0	1	1	0	0	0	0	0	1
Q9CZ13	Q9CZ13	2	2	2	Cytochrome b-c1 complex subunit 1, mitochondrial	Uqcrc1	sp|Q9CZ13|QCR1_MOUSE Cytochrome b-c1 complex subunit 1, mitochondrial OS=Mus musculus OX=10090 GN=Uqcrc1 PE=1 SV=2	1	2	2	2	0	0	0	0	0	0	0	1	1	0	0	0	0	1	1	0	0	0	0	0	0	0	0	0	0	0	0	0	0	0	0	1	1	0	0	0	0	1
Q9DB77;A0A140LI98	Q9DB77	9;1	9;1	9;1	Cytochrome b-c1 complex subunit 2, mitochondrial	Uqcrc2	sp|Q9DB77|QCR2_MOUSE Cytochrome b-c1 complex subunit 2, mitochondrial OS=Mus musculus OX=10090 GN=Uqcrc2 PE=1 SV=1	2	9	9	9	1	0	0	1	0	0	6	7	1	1	0	0	1	4	7	1	1	0	1	0	1	0	0	0	1	0	0	1	0	0	6	7	1	1	0	0	1	4
Q9CQ69	Q9CQ69	1	1	1	Cytochrome b-c1 complex subunit 8	Uqcrq	sp|Q9CQ69|QCR8_MOUSE Cytochrome b-c1 complex subunit 8 OS=Mus musculus OX=10090 GN=Uqcrq PE=1 SV=3	1	1	1	1	1	1	1	1	0	0	1	1	1	1	0	0	0	1	1	1	1	1	0	1	1	0	0	0	1	1	1	1	0	0	1	1	1	1	0	0	0	1
P63024;P63044;B0QZN5	P63024;P63044;B0QZN5	1;1;1	1;1;1	1;1;1	Vesicle-associated membrane protein 3;Vesicle-associated membrane protein 2	Vamp3;Vamp2	sp|P63024|VAMP3_MOUSE Vesicle-associated membrane protein 3 OS=Mus musculus OX=10090 GN=Vamp3 PE=1 SV=1;sp|P63044|VAMP2_MOUSE Vesicle-associated membrane protein 2 OS=Mus musculus OX=10090 GN=Vamp2 PE=1 SV=2;tr|B0QZN5|B0QZN5_MOUSE Synaptobrevin-2 OS=Mus mu	3	1	1	1	0	0	0	0	0	0	0	0	0	0	0	0	0	0	1	0	0	0	0	0	0	0	0	0	0	0	0	0	0	0	0	0	0	0	0	0	0	0
Q60932;F2Z471	Q60932;F2Z471	6;4	6;4	6;4	Voltage-dependent anion-selective channel protein 1	Vdac1	sp|Q60932|VDAC1_MOUSE Voltage-dependent anion-selective channel protein 1 OS=Mus musculus OX=10090 GN=Vdac1 PE=1 SV=3;tr|F2Z471|F2Z471_MOUSE Voltage-dependent anion-selective channel protein 1 OS=Mus musculus OX=10090 GN=Vdac1 PE=1 SV=1	2	6	6	6	3	1	3	1	0	0	3	5	0	4	1	0	0	4	5	0	2	0	0	1	2	0	0	0	3	1	3	1	0	0	3	5	0	4	1	0	0	4
Q60930;G3UX26;D3YZT5;A0A286YCR8	Q60930;G3UX26	5;5;2;2	5;5;2;2	5;5;2;2	Voltage-dependent anion-selective channel protein 2	Vdac2	sp|Q60930|VDAC2_MOUSE Voltage-dependent anion-selective channel protein 2 OS=Mus musculus OX=10090 GN=Vdac2 PE=1 SV=2;tr|G3UX26|G3UX26_MOUSE Outer mitochondrial membrane protein porin 2 OS=Mus musculus OX=10090 GN=Vdac2 PE=1 SV=1	4	5	5	5	0	0	0	0	0	0	4	4	5	0	0	0	0	4	4	4	0	0	0	0	0	0	0	0	0	0	0	0	0	0	4	4	5	0	0	0	0	4
Q60931;J3QMG3	Q60931;J3QMG3	2;2	2;2	2;2	Voltage-dependent anion-selective channel protein 3	Vdac3	sp|Q60931|VDAC3_MOUSE Voltage-dependent anion-selective channel protein 3 OS=Mus musculus OX=10090 GN=Vdac3 PE=1 SV=1;tr|J3QMG3|J3QMG3_MOUSE Voltage-dependent anion-selective channel protein 3 OS=Mus musculus OX=10090 GN=Vdac3 PE=1 SV=1	2	2	2	2	0	0	0	0	0	0	1	1	1	0	0	0	0	1	1	1	0	0	0	0	0	0	0	0	0	0	0	0	0	0	1	1	1	0	0	0	0	1
Q8R0A6;A0A140LHB6;F6Y6A6	Q8R0A6;A0A140LHB6;F6Y6A6	1;1;1	1;1;1	1;1;1	V-set and transmembrane domain-containing protein 2A	Vstm2a	sp|Q8R0A6|VTM2A_MOUSE V-set and transmembrane domain-containing protein 2A OS=Mus musculus OX=10090 GN=Vstm2a PE=1 SV=2;tr|A0A140LHB6|A0A140LHB6_MOUSE V-set and transmembrane domain-containing protein 2A (Fragment) OS=Mus musculus OX=10090 GN=Vstm2a PE=1 S	3	1	1	1	1	1	1	1	1	1	1	1	1	1	0	1	1	1	1	1	1	1	1	1	1	1	1	1	1	1	1	1	1	1	1	1	1	1	0	1	1	1
P29788	P29788	1	1	1	Vitronectin	Vtn	sp|P29788|VTNC_MOUSE Vitronectin OS=Mus musculus OX=10090 GN=Vtn PE=1 SV=2	1	1	1	1	0	0	0	1	1	1	0	0	0	1	1	1	0	0	0	0	0	0	0	0	1	1	0	1	0	0	0	1	1	1	0	0	0	1	1	1	0	0
P62960;A2BGG7	P62960;A2BGG7	1;1	1;1	1;1	Nuclease-sensitive element-binding protein 1	Ybx1	sp|P62960|YBOX1_MOUSE Y-box-binding protein 1 OS=Mus musculus OX=10090 GN=Ybx1 PE=1 SV=3;tr|A2BGG7|A2BGG7_MOUSE Y-box-binding protein 1 (Fragment) OS=Mus musculus OX=10090 GN=Ybx1 PE=1 SV=1	2	1	1	1	0	0	0	0	0	0	1	1	0	0	0	0	0	1	1	0	0	0	0	0	0	0	0	0	0	0	0	0	0	0	1	1	0	0	0	0	0	1
P62259;D6REF3	P62259;D6REF3	3;2	1;1	1;1	14-3-3 protein epsilon	Ywhae	sp|P62259|1433E_MOUSE 14-3-3 protein epsilon OS=Mus musculus OX=10090 GN=Ywhae PE=1 SV=1;tr|D6REF3|D6REF3_MOUSE 14-3-3 protein epsilon OS=Mus musculus OX=10090 GN=Ywhae PE=1 SV=1	2	3	1	1	0	0	0	1	0	0	2	3	0	1	0	0	0	3	3	0	0	0	0	0	0	1	0	0	0	0	0	0	0	0	0	1	0	0	0	0	0	1
P61982;Q9CQV8;P68510;O70456;F6WA09;A2A5N1	P61982;Q9CQV8;P68510;O70456	3;2;2;2;1;1	1;0;0;0;0;0	1;0;0;0;0;0	14-3-3 protein gamma;14-3-3 protein gamma, N-terminally processed;14-3-3 protein beta/alpha;14-3-3 protein beta/alpha, N-terminally processed;14-3-3 protein eta;14-3-3 protein sigma	Ywhag;Ywhab;Ywhah;Sfn	sp|P61982|1433G_MOUSE 14-3-3 protein gamma OS=Mus musculus OX=10090 GN=Ywhag PE=1 SV=2;sp|Q9CQV8|1433B_MOUSE 14-3-3 protein beta/alpha OS=Mus musculus OX=10090 GN=Ywhab PE=1 SV=3;sp|P68510|1433F_MOUSE 14-3-3 protein eta OS=Mus musculus OX=10090 GN=Ywhah PE	6	3	1	1	0	0	0	1	0	0	3	3	0	1	0	0	0	3	3	0	0	0	0	0	0	1	0	0	0	0	0	0	0	0	1	1	0	0	0	0	0	1
P68254	P68254	3	1	1	14-3-3 protein theta	Ywhaq	sp|P68254|1433T_MOUSE 14-3-3 protein theta OS=Mus musculus OX=10090 GN=Ywhaq PE=1 SV=1	1	3	1	1	0	0	0	1	0	0	2	2	1	1	0	0	0	2	2	1	0	0	0	0	0	1	0	0	0	0	0	0	0	0	0	0	1	0	0	0	0	0
P63101;A0A2I3BQ03;D3YXN6;D3YXF4	P63101;A0A2I3BQ03	5;4;2;1	5;4;2;1	3;3;1;1	14-3-3 protein zeta/delta	Ywhaz	sp|P63101|1433Z_MOUSE 14-3-3 protein zeta/delta OS=Mus musculus OX=10090 GN=Ywhaz PE=1 SV=1;tr|A0A2I3BQ03|A0A2I3BQ03_MOUSE 14-3-3 protein zeta/delta (Fragment) OS=Mus musculus OX=10090 GN=Ywhaz PE=1 SV=1	4	5	5	3	0	1	0	1	0	0	3	4	1	2	1	0	0	3	4	1	1	0	0	0	1	1	0	0	0	1	0	1	0	0	3	4	1	2	1	0	0	3
Q80WQ9	Q80WQ9	1	1	1	Zinc finger BED domain-containing protein 4	Zbed4	sp|Q80WQ9|ZBED4_MOUSE Zinc finger BED domain-containing protein 4 OS=Mus musculus OX=10090 GN=Zbed4 PE=2 SV=1	1	1	1	1	1	0	0	0	0	1	0	0	0	0	0	0	0	0	0	0	0	0	0	0	0	0	0	0	1	0	0	0	0	1	0	0	0	0	0	0	0	0
Q9D2D7	Q9D2D7	1	1	1	Zinc finger protein 687	Znf687	sp|Q9D2D7|ZN687_MOUSE Zinc finger protein 687 OS=Mus musculus OX=10090 GN=Znf687 PE=1 SV=1	1	1	1	1	0	0	0	1	1	1	0	0	0	1	1	1	1	0	0	0	0	0	0	0	1	1	1	1	0	0	0	1	1	1	0	0	0	1	1	1	1	0
CON__P35908v2;CON__P35908;CON__Q01546;Q6IFZ9;Q9R0H5;Q6NXH9;CON__Q9R0H5;CON__Q6NXH9;CON__Q7Z794;CON__P19013	CON__P35908v2;CON__P35908	25;25;5;3;3;3;3;3;3;2	24;24;5;2;2;2;2;2;2;2	16;16;0;0;0;0;0;0;0;0			;	10	25	24	16	9	22	9	12	11	13	4	8	11	8	17	7	6	3	5	11	3	20	12	13	4	15	14	7	8	21	8	11	10	12	4	8	10	7	16	6	5	3
CON__ENSEMBL:ENSBTAP00000024466;CON__ENSEMBL:ENSBTAP00000024462	CON__ENSEMBL:ENSBTAP00000024466;CON__ENSEMBL:ENSBTAP00000024462	1;1	1;1	1;1			;	2	1	1	1	0	0	0	0	0	0	1	0	0	0	0	0	0	0	1	0	0	0	0	0	0	0	0	0	0	0	0	0	0	0	1	0	0	0	0	0	0	0
CON__ENSEMBL:ENSP00000377550;CON__P13646-1;Q9D312;CON__Q61782;CON__P35900;CON__Q9D312;CON__Q8N1A0;Q8CCX5	CON__ENSEMBL:ENSP00000377550;CON__P13646-1	7;6;2;2;2;2;1;1	1;1;0;0;0;0;0;0	1;1;0;0;0;0;0;0			;	8	7	1	1	4	3	1	1	0	2	0	1	2	3	2	1	0	0	1	2	0	3	2	2	0	2	1	0	0	0	0	0	0	0	0	0	1	0	0	0	0	0
REV__A2AFR3;REV__A0A589MR22;REV__A0A571BG68	REV__A2AFR3;REV__A0A589MR22;REV__A0A571BG68	1;1;1	1;1;1	1;1;1			sp|A2AFR3|FRPD4_MOUSE FERM and PDZ domain-containing protein 4 OS=Mus musculus OX=10090 GN=Frmpd4 PE=1 SV=1;tr|A0A589MR22|A0A589MR22_MOUSE FERM and PDZ domain-containing protein 4 OS=Mus musculus OX=10090 GN=Frmpd4 PE=1 SV=1;tr|A0A571BG68|A0A571BG68_MOUSE	3	1	1	1	0	0	0	0	0	0	0	0	1	0	0	0	0	0	0	0	0	0	0	0	0	0	0	0	0	0	0	0	0	0	0	0	1	0	0	0	0	0
P01806;P01811;P01810;P01808;P01807	P01806;P01811;P01810;P01808;P01807	1;1;1;1;1	1;1;1;1;1	1;1;1;1;1	Ig heavy chain V region 441;Ig heavy chain V region UPC10;Ig heavy chain V region J539;Ig heavy chain V region T601;Ig heavy chain V region X44		sp|P01806|HVM36_MOUSE Ig heavy chain V region 441 OS=Mus musculus OX=10090 PE=4 SV=1;sp|P01811|HVM41_MOUSE Ig heavy chain V region UPC10 OS=Mus musculus OX=10090 PE=1 SV=1;sp|P01810|HVM40_MOUSE Ig heavy chain V region J539 OS=Mus musculus OX=10090 PE=1 SV=	5	1	1	1	1	1	1	1	1	1	0	0	0	0	1	0	0	0	0	0	0	0	0	0	0	0	0	0	1	1	1	1	1	1	0	0	0	0	1	0	0	0
REV__P97313	REV__P97313	1	1	1			sp|P97313|PRKDC_MOUSE DNA-dependent protein kinase catalytic subunit OS=Mus musculus OX=10090 GN=Prkdc PE=1 SV=3	1	1	1	1	0	0	0	0	0	1	0	0	0	1	1	0	0	0	0	0	0	0	0	0	0	0	0	0	0	0	0	0	0	1	0	0	0	1	1	0	0	0
A0A0G2JE99;P01843	A0A0G2JE99;P01843	1;1	1;1	1;1	Ig lambda-1 chain C region		tr|A0A0G2JE99|A0A0G2JE99_MOUSE Immunoglobulin lambda constant 1 (Fragment) OS=Mus musculus OX=10090 GN=Iglc1 PE=4 SV=1;sp|P01843|LAC1_MOUSE Ig lambda-1 chain C region OS=Mus musculus OX=10090 PE=1 SV=1	2	1	1	1	0	0	0	0	0	0	0	0	1	0	0	0	0	0	0	1	0	0	0	0	0	0	0	0	0	0	0	0	0	0	0	0	1	0	0	0	0	0
A0A140LI28	A0A140LI28	1	1	1			tr|A0A140LI28|A0A140LI28_MOUSE Family with sequence similarity 81, member B OS=Mus musculus OX=10090 GN=Fam81b PE=1 SV=1	1	1	1	1	0	0	0	0	1	1	0	0	0	0	0	0	0	0	0	0	0	0	0	0	0	0	0	0	0	0	0	0	1	1	0	0	0	0	0	0	0	0
A0A140T8N3	A0A140T8N3	1	1	1			tr|A0A140T8N3|A0A140T8N3_MOUSE Immunoglobulin kappa chain variable 13-84 (Fragment) OS=Mus musculus OX=10090 GN=Igkv13-84 PE=4 SV=2	1	1	1	1	1	1	1	0	0	0	0	0	0	0	0	0	0	0	0	0	1	0	1	1	0	0	0	0	1	1	1	0	0	0	0	0	0	0	0	0	0	0
A0A140T8P6;P01635	A0A140T8P6;P01635	1;1	1;1	1;1	Ig kappa chain V-V region K2		tr|A0A140T8P6|A0A140T8P6_MOUSE Immunoglobulin kappa variable 12-46 (Fragment) OS=Mus musculus OX=10090 GN=Igkv12-46 PE=1 SV=2;sp|P01635|KV5A3_MOUSE Ig kappa chain V-V region K2 (Fragment) OS=Mus musculus OX=10090 PE=1 SV=1	2	1	1	1	0	0	0	0	0	0	0	0	1	0	0	0	0	0	0	1	0	0	0	0	0	0	0	0	0	0	0	0	0	0	0	0	1	0	0	0	0	0
REV__A0A1L1SSQ5;REV__A0A1L1SQ76;REV__A0A1L1SRD0;REV__A0A1L1SVK0;REV__Q61206	REV__A0A1L1SSQ5;REV__A0A1L1SQ76;REV__A0A1L1SRD0;REV__A0A1L1SVK0;REV__Q61206	1;1;1;1;1	1;1;1;1;1	1;1;1;1;1			tr|A0A1L1SSQ5|A0A1L1SSQ5_MOUSE Platelet-activating factor acetylhydrolase IB subunit alpha2 (Fragment) OS=Mus musculus OX=10090 GN=Pafah1b2 PE=1 SV=1;tr|A0A1L1SQ76|A0A1L1SQ76_MOUSE Platelet-activating factor acetylhydrolase IB subunit alpha2 (Fragment) OS=	5	1	1	1	0	0	0	0	0	0	0	0	0	0	0	0	0	1	0	0	0	0	0	0	0	0	0	0	0	0	0	0	0	0	0	0	0	0	0	0	0	1
REV__A0A2I3BRT4;REV__Q8R0W0	REV__A0A2I3BRT4;REV__Q8R0W0	1;1	1;1	1;1			tr|A0A2I3BRT4|A0A2I3BRT4_MOUSE Epiplakin OS=Mus musculus OX=10090 GN=Eppk1 PE=1 SV=1;sp|Q8R0W0|EPIPL_MOUSE Epiplakin OS=Mus musculus OX=10090 GN=Eppk1 PE=1 SV=2	2	1	1	1	0	0	0	0	0	0	1	0	0	0	0	0	0	0	0	0	0	0	0	0	0	0	0	0	0	0	0	0	0	0	1	0	0	0	0	0	0	0
A0A5F8MPR8	A0A5F8MPR8	1	1	1			tr|A0A5F8MPR8|A0A5F8MPR8_MOUSE Ankyrin repeat and SOCS box protein 5 OS=Mus musculus OX=10090 GN=Asb5 PE=3 SV=1	1	1	1	1	1	0	0	0	0	0	0	0	1	0	0	0	1	0	0	0	1	0	1	0	0	0	0	0	1	0	0	0	0	0	0	0	1	0	0	0	1	0
A0A5H1ZRK8;P01837	A0A5H1ZRK8;P01837	3;3	3;3	3;3	Ig kappa chain C region		tr|A0A5H1ZRK8|A0A5H1ZRK8_MOUSE Immunoglobulin kappa constant (Fragment) OS=Mus musculus OX=10090 GN=Igkc PE=1 SV=1;sp|P01837|IGKC_MOUSE Immunoglobulin kappa constant OS=Mus musculus OX=10090 GN=Igkc PE=1 SV=2	2	3	3	3	3	0	0	0	0	0	0	0	0	2	2	0	1	0	0	0	2	0	0	1	2	1	0	0	3	0	0	0	0	0	0	0	0	2	2	0	1	0
REV__D3YY43;REV__D3Z4W6;REV__D3YTN2;REV__D3YUT0;REV__A0A0R4J1X5;REV__D3Z080;REV__Q3UTJ2;REV__B7ZWM6;REV__B9EKP8	REV__D3YY43;REV__D3Z4W6;REV__D3YTN2;REV__D3YUT0;REV__A0A0R4J1X5;REV__D3Z080;REV__Q3UTJ2;REV__B7ZWM6;REV__B9EKP8	1;1;1;1;1;1;1;1;1	1;1;1;1;1;1;1;1;1	1;1;1;1;1;1;1;1;1			tr|D3YY43|D3YY43_MOUSE Sorbin and SH3 domain-containing protein 2 (Fragment) OS=Mus musculus OX=10090 GN=Sorbs2 PE=1 SV=8;tr|D3Z4W6|D3Z4W6_MOUSE Sorbin and SH3 domain-containing protein 2 (Fragment) OS=Mus musculus OX=10090 GN=Sorbs2 PE=1 SV=1;tr|D3YTN2|D3	9	1	1	1	0	0	0	0	1	0	0	0	0	0	1	1	1	0	0	1	0	1	0	0	0	0	1	1	0	0	0	0	1	0	0	0	0	0	1	1	1	0
REV__D3Z7N7	REV__D3Z7N7	1	1	1			tr|D3Z7N7|D3Z7N7_MOUSE SPRY domain-containing SOCS box protein 2 (Fragment) OS=Mus musculus OX=10090 GN=Spsb2 PE=1 SV=1	1	1	1	1	0	1	1	1	0	1	1	1	0	0	1	1	0	1	1	0	1	0	0	0	0	1	0	1	0	1	1	1	0	1	1	1	0	0	1	1	0	1
CON__P00761	CON__P00761	5	5	5				1	5	5	5	3	3	2	3	2	2	3	3	3	2	3	3	3	3	3	4	3	4	3	3	3	3	2	3	3	3	2	3	2	2	3	3	3	2	3	3	3	3
CON__P02769	CON__P02769	35	35	30				1	35	35	30	27	28	27	28	27	26	28	28	28	20	29	21	16	29	28	28	22	29	22	22	18	29	24	22	27	28	27	28	27	26	28	28	28	20	29	21	16	29
CON__P35527	CON__P35527	26	26	25				1	26	26	25	13	22	14	15	15	19	11	10	12	21	21	12	6	10	11	14	13	20	20	15	8	20	18	13	13	22	14	15	15	19	11	10	12	21	21	12	6	10
CON__P13645;P02535;CON__P02535-1;A2A513;CON__Q7Z3Y7;CON__Q148H6;CON__Q2M2I5;CON__Q7Z3Z0;CON__P05784;CON__Q99456;P05784;CON__Q7Z3Y8;CON__REFSEQ:XP_986630;CON__O76014;CON__A2AB72;CON__O76013;CON__O76015;CON__Q497I4;CON__Q7Z3Y9;CON__Q14525;CON__A2A5Y0;CON__Q9UE12;CON__Q92764;CON__Q15323;Q61897;Q8VCW2;B1ATJ5;Q6IFX3;Q9Z320;Q497I4;B1AQ75;Q61765;Q62168;A6BLY7;A1L317;CON__Q14532	CON__P13645	23;8;8;8;3;3;2;2;2;2;2;2;1;1;1;1;1;1;1;1;1;1;1;1;1;1;1;1;1;1;1;1;1;1;1;1	19;6;6;6;1;1;1;1;0;0;0;1;0;0;0;0;0;0;0;0;0;0;0;0;0;0;0;0;0;0;0;0;0;0;0;0	17;4;4;4;1;1;0;1;0;0;0;1;0;0;0;0;0;0;0;0;0;0;0;0;0;0;0;0;0;0;0;0;0;0;0;0				36	23	19	17	11	17	10	8	9	8	5	7	12	9	14	7	6	4	5	16	4	13	12	10	5	13	11	6	11	14	10	7	8	8	5	7	10	8	12	5	6	4
CON__P04264;CON__H-INV:HIT000016045;E9Q0F0	CON__P04264	37;2;1	37;2;1	24;0;0				3	37	37	24	18	29	14	14	13	15	9	8	16	21	22	12	10	7	8	20	9	25	17	15	7	22	20	11	18	29	14	14	13	15	9	8	16	21	22	12	10	7
CON__P02662	CON__P02662	4	4	4				1	4	4	4	2	4	2	2	3	1	1	0	0	2	4	2	2	0	0	0	4	4	2	2	3	4	1	4	2	4	2	2	3	1	1	0	0	2	4	2	2	0
CON__P02768-1	CON__P02768-1	9	4	4				1	9	4	4	4	4	4	4	5	4	5	5	8	2	4	3	2	6	5	8	3	4	3	4	2	4	3	2	0	0	0	0	0	0	2	2	3	0	0	0	0	3
CON__P02668	CON__P02668	2	2	2				1	2	2	2	0	1	0	0	1	0	0	0	0	0	1	0	0	0	0	0	0	2	0	1	1	2	0	2	0	1	0	0	1	0	0	0	0	0	1	0	0	0
CON__P02666	CON__P02666	1	1	1				1	1	1	1	0	1	1	1	1	0	0	0	0	0	1	0	0	0	0	0	1	1	0	1	1	1	0	1	0	1	1	1	1	0	0	0	0	0	1	0	0	0
CON__P08779;Q9Z2K1;CON__Q9Z2K1;CON__Q3ZAW8;Q9WTL4	CON__P08779	26;9;9;9;1	25;9;9;9;1	15;3;3;3;1				5	26	25	15	3	9	4	1	1	0	2	2	5	23	2	3	1	2	2	4	1	7	7	3	0	3	2	0	3	8	4	0	1	0	2	2	4	23	1	2	1	2
CON__P02754	CON__P02754	7	7	7				1	7	7	7	0	6	1	0	3	0	0	1	0	0	5	0	0	0	0	0	0	6	0	1	0	7	0	2	0	6	1	0	3	0	0	1	0	0	5	0	0	0
CON__Q2UVX4	CON__Q2UVX4	3	3	3				1	3	3	3	0	0	0	3	3	3	0	0	1	2	3	3	1	0	0	0	0	0	0	0	2	3	2	2	0	0	0	3	3	3	0	0	1	2	3	3	1	0
CON__ENSEMBL:ENSBTAP00000014147	CON__ENSEMBL:ENSBTAP00000014147	1	1	1				1	1	1	1	0	0	0	0	0	0	1	1	1	0	0	0	0	1	1	1	0	0	0	0	0	0	0	0	0	0	0	0	0	0	1	1	1	0	0	0	0	1
CON__P02533;Q6IFX2;CON__Q6IFX2;Q61414;CON__A2A4G1;B1AQ77;CON__P19012;P19001;CON__P19001	CON__P02533	18;8;8;7;7;7;7;5;5	8;3;3;0;0;0;0;0;0	3;2;2;0;0;0;0;0;0				9	18	8	3	3	6	1	1	1	1	1	1	5	15	2	3	0	1	1	4	2	8	6	2	0	2	2	0	0	1	0	0	0	1	0	0	1	8	0	0	0	0
CON__P13647	CON__P13647	14	4	3				1	14	4	3	3	8	1	1	2	1	0	0	2	12	6	1	1	0	0	4	1	6	3	3	0	5	3	0	1	2	0	0	0	0	0	0	1	3	2	0	0	0
CON__Q1A7A4	CON__Q1A7A4	2	2	2				1	2	2	2	0	0	0	1	1	1	0	0	0	0	1	2	0	0	0	0	0	0	0	0	1	1	1	1	0	0	0	1	1	1	0	0	0	0	1	2	0	0
CON__P02538;CON__O95678;P11679;Q8VED5;CON__P05787;CON__Q8VED5;CON__H-INV:HIT000292931	CON__P02538	21;7;5;5;5;5;2	2;0;0;0;0;0;0	2;0;0;0;0;0;0				7	21	2	2	3	10	2	2	2	2	0	0	2	20	6	1	2	0	0	3	1	5	4	4	0	5	4	0	0	0	0	0	0	0	0	0	0	2	0	0	0	0
CON__ENSEMBL:ENSBTAP00000007350	CON__ENSEMBL:ENSBTAP00000007350	3	3	1				1	3	3	1	0	0	0	3	2	3	0	0	1	1	2	3	0	0	0	0	0	0	0	0	1	3	0	3	0	0	0	3	2	3	0	0	1	1	2	3	0	0
CON__P04259	CON__P04259	21	1	1				1	21	1	1	3	10	2	2	2	2	0	0	2	20	5	1	2	0	0	3	1	5	3	4	0	5	4	0	0	0	0	0	0	0	0	0	0	1	0	0	0	0
CON__P01030	CON__P01030	3	1	1				1	3	1	1	0	0	0	3	1	2	0	0	0	1	2	2	0	0	0	0	0	0	0	0	1	2	0	2	0	0	0	1	0	0	0	0	0	0	1	0	0	0
CON__P48668	CON__P48668	21	14	0				1	21	14	0	3	10	2	2	2	2	0	0	2	20	6	1	2	0	0	3	1	5	4	4	0	5	4	0	0	4	0	1	0	0	0	0	0	14	1	0	0	0
856;18857;18858;18859;18860;18861;18862;18863;18864;18865;18866;18867;18868;18869;18870;18871;18872;18873;18874;18875;18876;18877;18878;18879;18880;18881;18882;18883;18884;18885;18886;18887;18888;18889;18890;18891;18892;18893;18894;18895;18896;18897;18898;18899;18900;18901;18902;18903;18904;18905;18906;18907;18908;18909;18910;18911;18912;18913;18914;18915;18916;18917;18918;18919;18920;18921;18922…	1111;2344;2583;3369;4317;4348;4374;4891;5821;6738;8625;11917;12024;12106;13693;14046;14790;15515;16825;18385;18845;18871;19814;20775;22947;23413;24426;24740;24945;25404;26767;28727;31105;32445;32663	121;122	469;571	-1
1683;31684;31685;31686;31687;31688;31689;31690;31691;31692;31693;31694;31695;31696;31697;31698;31699;31700;31701;31702;31703;31704;31705;31706;31707;31708;31709;31710;31711;31712;31713;31714;31715;31716;31717;31718;31719;31720;31721;31722;31723;31724;31725;31726;31727;31728;31729;31730;31731;31732;31733;31734;31735;31736;31737;31738;31739;31740;31741;31742;31743;31744;31745;31746;31747;31748;3174…	67;4639;5907;5960;6080;6748;7190;8946;9126;9345;9938;10395;10869;10917;10984;11060;12468;13391;14391;14416;17943;17992;18114;20399;20638;20840;23675;24094;24153;25012;25058;26473;26522;27739;28036;28852;29307;30136;30274;30482;30918;31535;31591;31593;31595;32024;32906	94;95;178;179;180;181;182;183;184;185	48;307;428;429;435;484;517;524;650;729	-1;-1
1002;31003;31004;31005;31006;31007;31008;31009;31010;31011;31012;31013;31014;31015;31016;31017;31018;31019;31020;31021;31022;31023;31024;31025;31026;31027;31028;31029;31030;31031;31032;31033;31034;31035;31036;31037;31038;31039;31040;31041;31042;31043;31044;31045;31046;31511;31512;31513;31514;31515;31516;31517;31518;31519;31520;31521;31522;31523;31524;31525;31526;31527;31528;31529;31530;31531;3153…	67;4639;5907;5960;6080;6748;7190;8946;9126;9345;9938;10395;10869;10917;10984;11060;12468;13391;14391;14416;17446;17588;18114;20399;20638;20718;20840;23675;24094;24153;25012;25058;26473;26522;28036;28852;29307;30136;30274;30482;30918;31535;31591;31593;31595;32024;32906	94;95;178;179;180;181;182;183;184;185	48;307;428;429;435;484;517;524;650;729	-1
0935;30936;30937;30938;30939;30940;30941;30942;30943;30944;30945;30946;30947;30948;30949;30950;30951;30952;30953;30954;30955;30956;30957;30958;30959;30960;30961;30962;30963;30964;30965;30966;30967;30968;30969;30970;30971;30972;30973;30974;30975;30976;30977;30978;30979;30980;30981;30982;30983;30984;30985;30986;30987;30988;30989;30990;30991;30992;30993;30994;30995;30996;30997;30998;30999;31000;3100…	67;4639;5907;5960;6080;6748;7190;8946;9126;9345;9938;10395;10627;10869;10917;10984;11060;12468;13391;14391;14416;17446;17588;18114;20399;20638;20840;23675;24094;24153;25012;25058;26473;26522;28036;28852;29307;30136;30274;30482;30918;31535;31591;31593;31595;32024;32906	94;95;178;179;180;181;182;183;184;185	48;307;428;429;435;484;517;524;650;729	-1
[truncated: 159 more columns]

## Sheet: Table S3
Table S3. Raw iBAQ values of AMPAR immunopurifications performed on wildtype and Gria deficient hippocampus crude synaptosomes, followed by the mean iBAQ intensity values and mean log 10 iBAQ intensity values.
Protein	Fasta headers	iBAQ WT_anti-GluA1_1	iBAQ WT_anti-GluA1_2	iBAQ WT_anti-GluA1_3	iBAQ WT_anti-GluA1_4	iBAQ A1KO_anti-GluA1_1	iBAQ A1KO_anti-GluA1_2	iBAQ A1KO_anti-GluA1_3	iBAQ WT_anti-GluA3_1	iBAQ WT_anti-GluA3_2	iBAQ WT_anti-GluA3_3	iBAQ A3KO_anti-GluA3_1	iBAQ A3KO_anti-GluA3_2	iBAQ A3KO_anti-GluA3_3	iBAQ WT_anti-GluA2/3_1	iBAQ WT_anti-GluA2/3_2	iBAQ WT_anti-GluA2/3_3	iBAQ WT_anti-GluA2/3_4	iBAQ A1KO_anti-GluA2/3_1	iBAQ A1KO_anti-GluA2/3_2	iBAQ A1KO_anti-GluA2/3_3	iBAQ A3KO_anti-GluA2/3_1	iBAQ A3KO_anti-GluA2/3_2	iBAQ A3KO_anti-GluA2/3_3	iBAQ A3KO_anti-GluA2/3_4	MEAN_WT_anti-GluA1	MEAN_WT_anti-GluA3	MEAN_WT_anti-GluA2/3	MEAN_A1KO_anti-GluA2/3	MEAN_A3KO_Anti-GluA2/3	MEAN_LOG10_WT_Anti-GluA1	MEAN_LOG10_WT_Anti-GluA3	MEAN_LOG10_WT_Anti-GluA2/3	MEAN_LOG10_A1KO_Anti-GluA2/3	MEAN_LOG10_A3KO_Anti-GluA2/3
GluA1	sp|P23818|GRIA1_MOUSE Glutamate receptor 1 OS=Mus musculus OX=10090 GN=Gria1 PE=1 SV=1;tr|F6YNQ1|F6YNQ1_MOUSE Glutamate receptor OS=Mus musculus OX=10090 GN=Gria1 PE=1 SV=1	615220	897510	562800	823120	NAN	NAN	NAN	186980	214160	94399	NAN	NAN	NAN	NAN	1105100	1046700	828430	NAN	NAN	NAN	948760	991810	795990	692210	724662	165180	993410	NAN	857192	5.86014	5.21796	5.99713	NAN	5.93308
GluA2	sp|P23819|GRIA2_MOUSE Glutamate receptor 2 OS=Mus musculus OX=10090 GN=Gria2 PE=1 SV=3	1175300	NAN	1900500	1147900	NAN	NAN	NAN	1337400	1482100	736140	NAN	NAN	NAN	4331800	2811300	3413100	NAN	2904100	3991500	5957800	3601300	4085000	4107300	3434100	1407900	1.18521e+06	3.51873e+06	4.28447e+06	3806925	6.14857	6.0738	6.54639	6.6319	6.58057
GluA3	sp|Q9Z2W9|GRIA3_MOUSE Glutamate receptor 3 OS=Mus musculus OX=10090 GN=Gria3 PE=1 SV=2	75284	225080	82086	13237	NAN	NAN	NAN	376940	249580	808570	NAN	NAN	NAN	262730	872780	618070	607710	664160	1986000	1319800	NAN	NAN	NAN	NAN	98921.8	478363	590322	1323320	NAN	4.99529	5.67976	5.77109	6.12166	NAN
TARP-γ2	sp|O88602|CCG2_MOUSE Voltage-dependent calcium channel gamma-2 subunit OS=Mus musculus OX=10090 GN=Cacng2 PE=1 SV=1	NAN	298320	260010	328360	NAN	NAN	NAN	628510	634500	NAN	NAN	NAN	NAN	588160	839270	626740	806430	484710	1845300	248990	308970	1175300	480680	461450	295563	631505	715150	859667	606600	5.47065	5.80038	5.8544	5.93433	5.7829
TARP-γ3	sp|Q9JJV5|CCG3_MOUSE Voltage-dependent calcium channel gamma-3 subunit OS=Mus musculus OX=10090 GN=Cacng3 PE=1 SV=2	31893	NAN	193980	NAN	NAN	NAN	NAN	NAN	NAN	NAN	NAN	NAN	NAN	145760	NAN	295970	236950	NAN	372910	375130	NAN	110850	NAN	210910	112936	NAN	226227	374020	160880	5.05283	NAN	5.35454	5.57289	5.2065
TARP-γ8	sp|Q8VHW2|CCG8_MOUSE Voltage-dependent calcium channel gamma-8 subunit OS=Mus musculus OX=10090 GN=Cacng8 PE=1 SV=1;tr|F7CZ64|F7CZ64_MOUSE Voltage-dependent calcium channel gamma-8 subunit OS=Mus musculus OX=10090 GN=Cacng8 PE=1 SV=2	1363600	3055100	1973300	1149800	NAN	NAN	NAN	NAN	NAN	1131000	NAN	NAN	555810	4127300	5130700	1940500	3423600	67907	NAN	273140	2158200	6204800	5532600	2132400	1885450	1131000	3655525	170524	4007000	6.27542	6.05346	6.56295	5.23178	6.60282
CNIH-2	tr|A0A494B9S6|A0A494B9S6_MOUSE Protein cornichon homolog 2 OS=Mus musculus OX=10090 GN=Cnih2 PE=1 SV=1;sp|O35089|CNIH2_MOUSE Protein cornichon homolog 2 OS=Mus musculus OX=10090 GN=Cnih2 PE=1 SV=2	1734300	4380900	1421200	2709400	NAN	NAN	NAN	857640	1872400	NAN	NAN	NAN	NAN	2854900	10739000	1338600	1768900	369230	2210300	445620	6566500	13162000	2116200	2002000	2561450	1365020	4175350	1.00838e+06	5961675	6.40849	6.13514	6.62069	6.00363	6.77537
CPT1c	sp|Q8BGD5|CPT1C_MOUSE Carnitine O-palmitoyltransferase 1, brain isoform OS=Mus musculus OX=10090 GN=Cpt1c PE=1 SV=1	43308	299310	NAN	NAN	NAN	NAN	NAN	NAN	NAN	NAN	NAN	NAN	NAN	107650	311730	NAN	262680	54717	88261	NAN	NAN	213790	236250	20940	171309	NAN	227353	71489	156993	5.23378	NAN	5.3567	4.85424	5.19588
FRRS1L	sp|B1AXV0|FRS1L_MOUSE DOMON domain-containing protein FRRS1L OS=Mus musculus OX=10090 GN=Frrs1l PE=1 SV=1	216070	507600	320800	183410	NAN	NAN	NAN	NAN	NAN	NAN	NAN	NAN	NAN	568630	755850	405120	447980	168280	122150	NAN	994080	632580	804110	418050	306970	NAN	544395	145215	712205	5.4871	NAN	5.73591	5.16201	5.85261
Noelin1	tr|Q8R357|Q8R357_MOUSE Noelin OS=Mus musculus OX=10090 GN=Olfm1 PE=1 SV=1;sp|O88998|NOE1_MOUSE Noelin OS=Mus musculus OX=10090 GN=Olfm1 PE=1 SV=1;tr|A3KGE4|A3KGE4_MOUSE Noelin OS=Mus musculus OX=10090 GN=Olfm1 PE=1 SV=1;tr|G3X9Q7|G3X9Q7_MOUSE Noelin OS=Mus	92365	82560	NAN	18233	NAN	NAN	NAN	NAN	242110	37749	NAN	NAN	NAN	367910	140040	143620	307810	312280	776370	631510	107570	265590	275500	155190	64386	139930	239845	573387	200962	4.80879	5.14591	5.37993	5.75845	5.30312
Noelin3	tr|D3YTM3|D3YTM3_MOUSE Noelin-3 (Fragment) OS=Mus musculus OX=10090 GN=Olfm3 PE=1 SV=1;sp|P63056|NOE3_MOUSE Noelin-3 OS=Mus musculus OX=10090 GN=Olfm3 PE=1 SV=1	NAN	NAN	NAN	NAN	NAN	NAN	NAN	NAN	NAN	NAN	NAN	NAN	NAN	NAN	NAN	NAN	NAN	NAN	NAN	106500	NAN	NAN	NAN	NAN	NAN	NAN	NAN	106500	NAN	NAN	NAN	NAN	5.02735	NAN
SynDIG4	sp|O35449|PRRT1_MOUSE Proline-rich transmembrane protein 1 OS=Mus musculus OX=10090 GN=Prrt1 PE=1 SV=1	3292300	2894400	2961800	2365900	NAN	NAN	NAN	806850	1229600	403780	72198	NAN	NAN	3646400	5143300	4243600	4908700	NAN	NAN	NAN	5140000	4647000	2454800	1568400	2878600	813410	4485500	NAN	3452550	6.45918	5.91031	6.65181	NAN	6.53814
SAC1	sp|Q9EP69|SAC1_MOUSE Phosphatidylinositol-3-phosphatase SAC1 OS=Mus musculus OX=10090 GN=Sacm1l PE=1 SV=1;tr|A0A5F8MPK9|A0A5F8MPK9_MOUSE Phosphatidylinositol-3-phosphatase SAC1 OS=Mus musculus OX=10090 GN=Sacm1l PE=1 SV=1	NAN	NAN	6981.8	NAN	NAN	NAN	NAN	NAN	NAN	NAN	NAN	NAN	NAN	NAN	NAN	NAN	51037	NAN	NAN	NAN	NAN	NAN	NAN	NAN	6981.8	NAN	51037	NAN	NAN	3.84397	NAN	4.70789	NAN	NAN
Shisa6	tr|F6VQZ6|F6VQZ6_MOUSE Protein shisa-6 (Fragment) OS=Mus musculus OX=10090 GN=Shisa6 PE=1 SV=1;sp|Q3UH99|SHSA6_MOUSE Protein shisa-6 OS=Mus musculus OX=10090 GN=Shisa6 PE=1 SV=1	92146	14719	10043	47540	NAN	NAN	NAN	NAN	NAN	NAN	NAN	NAN	NAN	37362	20787	11641	207180	76119	NAN	NAN	252830	11492	269970	NAN	41112	NAN	69242.5	76119	178097	4.61397	NAN	4.84037	4.88149	5.25066
Shisa9	sp|Q9CZN4|SHSA9_MOUSE Protein shisa-9 OS=Mus musculus OX=10090 GN=Shisa9 PE=1 SV=2;tr|E9QN38|E9QN38_MOUSE Protein shisa-9 OS=Mus musculus OX=10090 GN=Shisa9 PE=1 SV=1	91497	207350	197200	86405	NAN	NAN	NAN	NAN	NAN	NAN	NAN	NAN	NAN	256490	184410	NAN	676390	99381	NAN	134520	NAN	486850	291900	NAN	145613	NAN	372430	116950	389375	5.1632	NAN	5.57104	5.068	5.59037
