# Supplementary material for: Expression and Interaction Proteomics of GluA1- and GluA3-Subunit-Containing AMPARs Reveal Distinct Protein Composition
Source: Cells. 2022 Nov 17;11(22):3648. doi: 10.3390/cells11223648 (PMC9688267; doi:10.3390/cells11223648)
Supplement: Supplementary file 1 [file cells-11-03648-s001.zip › Table S4.xlsx]

## Sheet: MaxQ output
Protein IDs	Majority protein IDs	Peptide counts (all)	Peptide counts (razor+unique)	Peptide counts (unique)	Protein names	Gene names	Fasta headers	Number of proteins	Peptides	Razor + unique peptides	Unique peptides	Peptides EB_1	Peptides EB_2	Peptides PRRT1_1	Peptides PRRT1_2	Peptides PRRT1_PB_1	Peptides PRRT1_PB_2	Peptides TARP2/4/8_1	Peptides TARP2/4/8_2	Peptides TARP2/8_1	Peptides TARP2/8_2	Razor + unique peptides EB_1	Razor + unique peptides EB_2	Razor + unique peptides PRRT1_1	Razor + unique peptides PRRT1_2	Razor + unique peptides PRRT1_PB_1	Razor + unique peptides PRRT1_PB_2	Razor + unique peptides TARP2/4/8_1	Razor + unique peptides TARP2/4/8_2	Razor + unique peptides TARP2/8_1	Razor + unique peptides TARP2/8_2	Unique peptides EB_1	Unique peptides EB_2	Unique peptides PRRT1_1	Unique peptides PRRT1_2	Unique peptides PRRT1_PB_1	Unique peptides PRRT1_PB_2	Unique peptides TARP2/4/8_1	Unique peptides TARP2/4/8_2	Unique peptides TARP2/8_1	Unique peptides TARP2/8_2	Sequence coverage [%]	Unique + razor sequence coverage [%]	Unique sequence coverage [%]	Mol. weight [kDa]	Sequence length	Sequence lengths	Fraction average	Fraction 1
A0A075B5J9;A0A075B5K3;A0A0G2JFA8;A0A0G2JDN5	A0A075B5J9;A0A075B5K3;A0A0G2JFA8;A0A0G2JDN5	1;1;1;1	1;1;1;1	1;1;1;1		Igkv17-127;Igkv17-121	tr|A0A075B5J9|A0A075B5J9_MOUSE Immunoglobulin kappa variable 17-127 OS=Mus musculus OX=10090 GN=Igkv17-127 PE=4 SV=7;tr|A0A075B5K3|A0A075B5K3_MOUSE Immunoglobulin kappa variable 17-121 OS=Mus musculus OX=10090 GN=Igkv17-121 PE=4 SV=7;tr|A0A0G2JFA8|A0A0G2JF	4	1	1	1	0	1	0	0	0	0	0	1	0	1	0	1	0	0	0	0	0	1	0	1	0	1	0	0	0	0	0	1	0	1	14.2	14.2	14.2	12.33	113	113;116;117;117	5
A0A075B5K2;A0A0G2JDR3	A0A075B5K2;A0A0G2JDR3	2;1	2;1	2;1		Igkv9-124	tr|A0A075B5K2|A0A075B5K2_MOUSE Immunoglobulin kappa chain variable 9-124 OS=Mus musculus OX=10090 GN=Igkv9-124 PE=1 SV=7;tr|A0A0G2JDR3|A0A0G2JDR3_MOUSE Immunoglobulin kappa chain variable 9-124 (Fragment) OS=Mus musculus OX=10090 GN=Igkv9-124 PE=1 SV=4	2	2	2	2	0	1	0	0	0	0	0	2	2	1	0	1	0	0	0	0	0	2	2	1	0	1	0	0	0	0	0	2	2	1	33.7	33.7	33.7	10.419	95	95;117	5
A0A075B5K6;P03976	A0A075B5K6;P03976	1;1	1;1	1;1	Ig kappa chain V-II region 17S29.1	Igkv2-109	tr|A0A075B5K6|A0A075B5K6_MOUSE Immunoglobulin kappa variable 2-109 (Fragment) OS=Mus musculus OX=10090 GN=Igkv2-109 PE=4 SV=4;sp|P03976|KV2A5_MOUSE Ig kappa chain V-II region 17S29.1 OS=Mus musculus OX=10090 PE=1 SV=1	2	1	1	1	0	1	0	0	0	0	0	0	0	1	0	1	0	0	0	0	0	0	0	1	0	1	0	0	0	0	0	0	0	1	10.8	10.8	10.8	13.057	120	120;113	5
A0A140T8M9;A0A140T8M0;A0A0B4J1I0;A0A075B5N0;A0A075B5K8;F6XWB2;A0A140T8N1;A0A0G2JDE5;P01631	A0A140T8M9;A0A140T8M0;A0A0B4J1I0;A0A075B5N0;A0A075B5K8;F6XWB2;A0A140T8N1;A0A0G2JDE5;P01631	1;1;1;1;1;1;1;1;1	1;1;1;1;1;1;1;1;1	1;1;1;1;1;1;1;1;1	Ig kappa chain V-II region 26-10	Igkv1-110;Igkv1-35;Igkv1-99;Igkv1-115	tr|A0A140T8M9|A0A140T8M9_MOUSE Immunoglobulin kappa chain variable 1-122 (Fragment) OS=Mus musculus OX=10090 GN=Igkv1-122 PE=4 SV=2;tr|A0A140T8M0|A0A140T8M0_MOUSE Immunoglobulin kappa variable 1-117 (Fragment) OS=Mus musculus OX=10090 GN=Igkv1-117 PE=4 SV=	9	1	1	1	1	1	0	1	1	0	1	1	1	1	1	1	0	1	1	0	1	1	1	1	1	1	0	1	1	0	1	1	1	1	10.9	10.9	10.9	13.117	119	119;119;119;119;119;120;120;120;113	4.89
A0A075B5M7;A0A0G2JDV4;A0A0B4J1J1	A0A075B5M7;A0A0G2JDV4;A0A0B4J1J1	2;1;1	2;1;1	1;0;0		Igkv5-39;Igkv5-45	tr|A0A075B5M7|A0A075B5M7_MOUSE Immunoglobulin kappa variable 5-39 OS=Mus musculus OX=10090 GN=Igkv5-39 PE=1 SV=7;tr|A0A0G2JDV4|A0A0G2JDV4_MOUSE Immunoglobulin kappa variable 5-39 (Fragment) OS=Mus musculus OX=10090 GN=Igkv5-39 PE=1 SV=4;tr|A0A0B4J1J1|A0A0B	3	2	2	1	1	2	0	1	1	0	1	2	2	2	1	2	0	1	1	0	1	2	2	2	0	1	0	0	0	0	0	1	1	1	31.6	31.6	18.9	10.345	95	95;115;115	5
A0A075B5N3;A0A0G2JE47	A0A075B5N3;A0A0G2JE47	3;3	3;3	2;2		Igkv8-28	tr|A0A075B5N3|A0A075B5N3_MOUSE Immunoglobulin kappa variable 8-28 OS=Mus musculus OX=10090 GN=Igkv8-28 PE=1 SV=7;tr|A0A0G2JE47|A0A0G2JE47_MOUSE Immunoglobulin kappa variable 8-28 (Fragment) OS=Mus musculus OX=10090 GN=Igkv8-28 PE=1 SV=4	2	3	3	2	1	1	2	2	2	2	1	2	1	1	1	1	2	2	2	2	1	2	1	1	1	1	1	1	1	1	1	2	1	1	23.8	23.8	23.8	10.903	101	101;121	4.04	3
A0A075B5N4;A0A140T8P7;A0A0G2JF28;A0A140T8M3;A0A140T8P5;A0A140T8M4;A0A0G2JFN8	A0A075B5N4;A0A140T8P7;A0A0G2JF28;A0A140T8M3;A0A140T8P5	3;3;3;3;2;1;1	2;2;2;2;1;1;1	1;1;1;1;1;0;0		Igkv8-27	tr|A0A075B5N4|A0A075B5N4_MOUSE Immunoglobulin kappa chain variable 8-27 OS=Mus musculus OX=10090 GN=Igkv8-27 PE=4 SV=1;tr|A0A140T8P7|A0A140T8P7_MOUSE Immunoglobulin kappa variable 8-21 (Fragment) OS=Mus musculus OX=10090 GN=Igkv8-21 PE=1 SV=2;tr|A0A0G2JF28	7	3	2	1	2	1	3	2	2	3	2	2	2	2	2	1	2	1	1	2	2	2	2	2	1	0	1	0	0	1	1	1	1	1	24	24	15	10.976	100	100;120;120;121;121;101;121	5
A0A075B5N5	A0A075B5N5	1	1	1		Igkv8-26	tr|A0A075B5N5|A0A075B5N5_MOUSE Immunoglobulin kappa variable 8-26 (Fragment) OS=Mus musculus OX=10090 GN=Igkv8-26 PE=4 SV=7	1	1	1	1	0	0	0	1	0	0	0	0	0	0	0	0	0	1	0	0	0	0	0	0	0	0	0	1	0	0	0	0	0	0	7.3	7.3	7.3	13.821	123	123	5
A0A075B5P3;A0A0A6YVP0	A0A075B5P3;A0A0A6YVP0	13;13	13;13	1;1		Ighg2b	tr|A0A075B5P3|A0A075B5P3_MOUSE Immunoglobulin heavy constant gamma 2B (Fragment) OS=Mus musculus OX=10090 GN=Ighg2b PE=1 SV=1;tr|A0A0A6YVP0|A0A0A6YVP0_MOUSE Immunoglobulin heavy constant gamma 2B (Fragment) OS=Mus musculus OX=10090 GN=Ighg2b PE=1 SV=2	2	13	13	1	9	10	5	8	7	6	8	8	8	8	9	10	5	8	7	6	8	8	8	8	1	1	1	1	1	1	1	1	1	1	50.3	50.3	5.7	36.568	336	336;405	2.94	10
A0A075B5P4;A0A0A6YWR2;P01868;P01869	A0A075B5P4;A0A0A6YWR2;P01868;P01869	8;8;7;7	8;8;7;7	8;8;7;7	Ig gamma-1 chain C region secreted form;Ig gamma-1 chain C region, membrane-bound form	Ighg1	tr|A0A075B5P4|A0A075B5P4_MOUSE Ig gamma-1 chain C region secreted form (Fragment) OS=Mus musculus OX=10090 GN=Ighg1 PE=1 SV=1;tr|A0A0A6YWR2|A0A0A6YWR2_MOUSE Ig gamma-1 chain C region secreted form (Fragment) OS=Mus musculus OX=10090 GN=Ighg1 PE=1 SV=1;sp|P	4	8	8	8	7	5	2	3	2	3	6	7	5	6	7	5	2	3	2	3	6	7	5	6	7	5	2	3	2	3	6	7	5	6	32.7	32.7	32.7	35.633	324	324;393;324;393	3.07	6
A0A075B5P5;A0A1Y7VJN6;P03987	A0A075B5P5;A0A1Y7VJN6;P03987	8;8;8	8;8;8	8;8;8	Ig gamma-3 chain C region	Ighg3	tr|A0A075B5P5|A0A075B5P5_MOUSE Immunoglobulin heavy constant gamma 3 (Fragment) OS=Mus musculus OX=10090 GN=Ighg3 PE=4 SV=1;tr|A0A1Y7VJN6|A0A1Y7VJN6_MOUSE Immunoglobulin heavy constant gamma 3 (Fragment) OS=Mus musculus OX=10090 GN=Ighg3 PE=4 SV=1;sp|P0398	3	8	8	8	8	8	1	4	3	3	4	8	6	7	8	8	1	4	3	3	4	8	6	7	8	8	1	4	3	3	4	8	6	7	28.5	28.5	28.5	36.198	330	330;399;398	3.08	1
A0A075B6A0;A0A075B5P6;P01872	A0A075B6A0;A0A075B5P6;P01872	12;12;12	12;12;12	12;12;12	Ig mu chain C region	Ighm	tr|A0A075B6A0|A0A075B6A0_MOUSE Immunoglobulin heavy constant mu (Fragment) OS=Mus musculus OX=10090 GN=Ighm PE=1 SV=2;tr|A0A075B5P6|A0A075B5P6_MOUSE Immunoglobulin heavy constant mu (Fragment) OS=Mus musculus OX=10090 GN=Ighm PE=1 SV=1;sp|P01872|IGHM_MOUSE	3	12	12	12	5	5	2	7	9	5	5	5	8	6	5	5	2	7	9	5	5	5	8	6	5	5	2	7	9	5	5	5	8	6	29.6	29.6	29.6	52.498	476	476;455;454	2.05	2
A0A075B5P9	A0A075B5P9	1	1	1		Ighv5-4	tr|A0A075B5P9|A0A075B5P9_MOUSE Immunoglobulin heavy variable 5-4 (Fragment) OS=Mus musculus OX=10090 GN=Ighv5-4 PE=4 SV=1	1	1	1	1	0	1	0	0	0	0	0	0	0	0	0	1	0	0	0	0	0	0	0	0	0	1	0	0	0	0	0	0	0	0	9.4	9.4	9.4	12.965	117	117	3
A0A075B5Q6;A0A075B5Q0;A0A0A6YVS4;P18526;P18524	A0A075B5Q6;A0A075B5Q0;A0A0A6YVS4;P18526;P18524	1;1;1;1;1	1;1;1;1;1	1;1;1;1;1	Ig heavy chain V region 345;Ig heavy chain V region RF	Ighv5-9-1;Ighv5-6	tr|A0A075B5Q6|A0A075B5Q6_MOUSE Immunoglobulin heavy variable 5-9-1 OS=Mus musculus OX=10090 GN=Ighv5-9-1 PE=1 SV=1;tr|A0A075B5Q0|A0A075B5Q0_MOUSE Immunoglobulin heavy variable 5-6 (Fragment) OS=Mus musculus OX=10090 GN=Ighv5-6 PE=4 SV=1;tr|A0A0A6YVS4|A0A0A	5	1	1	1	1	1	0	0	0	0	1	1	1	1	1	1	0	0	0	0	1	1	1	1	1	1	0	0	0	0	1	1	1	1	9.5	9.5	9.5	13.067	116	116;117;126;117;117	3
A0A075B5Q2	A0A075B5Q2	1	1	1		Ighv5-9	tr|A0A075B5Q2|A0A075B5Q2_MOUSE Immunoglobulin heavy variable 5-9 (Fragment) OS=Mus musculus OX=10090 GN=Ighv5-9 PE=4 SV=1	1	1	1	1	1	1	0	0	0	0	0	0	1	0	1	1	0	0	0	0	0	0	1	0	1	1	0	0	0	0	0	0	1	0	9.4	9.4	9.4	12.795	117	117	3
A0A075B5Q3;A0A0A6YY69	A0A075B5Q3;A0A0A6YY69	1;1	1;1	1;1		Ighv2-5	tr|A0A075B5Q3|A0A075B5Q3_MOUSE Immunoglobulin heavy variable 2-5 OS=Mus musculus OX=10090 GN=Ighv2-5 PE=4 SV=1;tr|A0A0A6YY69|A0A0A6YY69_MOUSE Immunoglobulin heavy variable 2-5 (Fragment) OS=Mus musculus OX=10090 GN=Ighv2-5 PE=4 SV=1	2	1	1	1	0	1	0	0	0	0	1	1	0	1	0	1	0	0	0	0	1	1	0	1	0	1	0	0	0	0	1	1	0	1	8.7	8.7	8.7	12.556	115	115;116	3
A0A075B5Q9;A0A0A6YWC7;A0A075B5Q4;P18525	A0A075B5Q9;A0A0A6YWC7;A0A075B5Q4;P18525	1;1;1;1	1;1;1;1	1;1;1;1	Ig heavy chain V region 5-84	Ighv5-15;Ighv5-12	tr|A0A075B5Q9|A0A075B5Q9_MOUSE Immunoglobulin heavy variable 5-15 OS=Mus musculus OX=10090 GN=Ighv5-15 PE=4 SV=1;tr|A0A0A6YWC7|A0A0A6YWC7_MOUSE Immunoglobulin heavy variable 5-15 (Fragment) OS=Mus musculus OX=10090 GN=Ighv5-15 PE=4 SV=1;tr|A0A075B5Q4|A0A07	4	1	1	1	1	1	0	0	0	0	0	1	1	1	1	1	0	0	0	0	0	1	1	1	1	1	0	0	0	0	0	1	1	1	13.8	13.8	13.8	12.943	116	116;117;117;117	3
A0A075B5R0;A0A0B4J1P4	A0A075B5R0;A0A0B4J1P4	2;2	2;2	2;2		Ighv5-16	tr|A0A075B5R0|A0A075B5R0_MOUSE Immunoglobulin heavy variable 5-16 OS=Mus musculus OX=10090 GN=Ighv5-16 PE=1 SV=1;tr|A0A0B4J1P4|A0A0B4J1P4_MOUSE Immunoglobulin heavy variable 5-16 (Fragment) OS=Mus musculus OX=10090 GN=Ighv5-16 PE=1 SV=1	2	2	2	2	1	2	0	0	0	0	0	1	1	1	1	2	0	0	0	0	0	1	1	1	1	2	0	0	0	0	0	1	1	1	23.3	23.3	23.3	13.217	116	116;117	3
A0A075B5R1	A0A075B5R1	1	1	1		Ighv5-17	tr|A0A075B5R1|A0A075B5R1_MOUSE Immunoglobulin heavy variable 5-17 (Fragment) OS=Mus musculus OX=10090 GN=Ighv5-17 PE=1 SV=1	1	1	1	1	1	1	0	0	0	0	1	1	1	1	1	1	0	0	0	0	1	1	1	1	1	1	0	0	0	0	1	1	1	1	9.4	9.4	9.4	12.905	117	117	3
A0A075B5R2;A0A075B5R3;A0A0A6YX91;P01786	A0A075B5R2;A0A075B5R3;A0A0A6YX91;P01786	2;1;1;1	2;1;1;1	2;1;1;1	Ig heavy chain V region MOPC 47A	Ighv7-3;Ighv7-2	tr|A0A075B5R2|A0A075B5R2_MOUSE Immunoglobulin heavy variable 7-3 (Fragment) OS=Mus musculus OX=10090 GN=Ighv7-3 PE=4 SV=2;tr|A0A075B5R3|A0A075B5R3_MOUSE Immunoglobulin heavy variable 7-2 OS=Mus musculus OX=10090 GN=Ighv7-2 PE=4 SV=1;tr|A0A0A6YX91|A0A0A6YX9	4	2	2	2	1	2	1	1	1	1	1	2	1	2	1	2	1	1	1	1	1	2	1	2	1	2	1	1	1	1	1	2	1	2	20	20	20	13.457	120	120;118;119;117	2.62
A0A075B5R9;A0A075B5R4	A0A075B5R9;A0A075B5R4	1;1	1;1	1;1		Ighv14-3;Ighv14-1	tr|A0A075B5R9|A0A075B5R9_MOUSE Immunoglobulin heavy variable V14-3 (Fragment) OS=Mus musculus OX=10090 GN=Ighv14-3 PE=4 SV=1;tr|A0A075B5R4|A0A075B5R4_MOUSE Immunoglobulin heavy variable 14-1 (Fragment) OS=Mus musculus OX=10090 GN=Ighv14-1 PE=4 SV=1	2	1	1	1	0	1	0	0	0	0	0	0	1	1	0	1	0	0	0	0	0	0	1	1	0	1	0	0	0	0	0	0	1	1	10.3	10.3	10.3	12.975	117	117;117	3
A0A075B5R5;P01806;P01812;P01808;P01807;P01809;P01810	A0A075B5R5;P01806;P01812;P01808;P01807	4;2;2;2;2;1;1	4;2;2;2;2;1;1	4;2;2;2;2;1;1	Ig heavy chain V region 441;Ig heavy chain V region MOPC 173;Ig heavy chain V region T601;Ig heavy chain V region X44	Ighv4-1	tr|A0A075B5R5|A0A075B5R5_MOUSE Immunoglobulin heavy variable 4-1 (Fragment) OS=Mus musculus OX=10090 GN=Ighv4-1 PE=1 SV=7;sp|P01806|HVM36_MOUSE Ig heavy chain V region 441 OS=Mus musculus OX=10090 PE=4 SV=1;sp|P01812|HVM42_MOUSE Ig heavy chain V region MOP	7	4	4	4	2	3	0	1	1	0	2	3	1	4	2	3	0	1	1	0	2	3	1	4	2	3	0	1	1	0	2	3	1	4	46.6	46.6	46.6	12.874	116	116;116;117;119;119;118;119	2.94
A0A075B5S2;P01790;P01794;P01791;P01788;P01787;P01789;P01793;P01792	A0A075B5S2;P01790;P01794;P01791;P01788;P01787	4;2;2;2;2;2;1;1;1	4;2;2;2;2;2;1;1;1	4;2;2;2;2;2;1;1;1	Ig heavy chain V region M511;Ig heavy chain V region HPCG14;Ig heavy chain V region HPCM6;Ig heavy chain V region H8;Ig heavy chain V regions TEPC 15/S107/HPCM1/HPCM2/HPCM3	Ighv7-1	tr|A0A075B5S2|A0A075B5S2_MOUSE Immunoglobulin heavy variable 7-1 (Fragment) OS=Mus musculus OX=10090 GN=Ighv7-1 PE=1 SV=2;sp|P01790|HVM21_MOUSE Ig heavy chain V region M511 OS=Mus musculus OX=10090 PE=1 SV=1;sp|P01794|HVM25_MOUSE Ig heavy chain V region HP	9	4	4	4	4	3	0	2	3	1	1	2	2	2	4	3	0	2	3	1	1	2	2	2	4	3	0	2	3	1	1	2	2	2	41.3	41.3	41.3	13.644	121	121;122;123;123;123;123;122;123;123	2.24
A0A075B5S5;A0A0A6YXL5	A0A075B5S5;A0A0A6YXL5	1;1	1;1	1;1		Ighv7-4	tr|A0A075B5S5|A0A075B5S5_MOUSE Immunoglobulin heavy variable 7-4 OS=Mus musculus OX=10090 GN=Ighv7-4 PE=4 SV=1;tr|A0A0A6YXL5|A0A0A6YXL5_MOUSE Immunoglobulin heavy variable 7-4 (Fragment) OS=Mus musculus OX=10090 GN=Ighv7-4 PE=4 SV=1	2	1	1	1	1	1	0	0	0	0	0	1	1	1	1	1	0	0	0	0	0	1	1	1	1	1	0	0	0	0	0	1	1	1	7.5	7.5	7.5	13.452	120	120;121	3
A0A075B5S6;P18531	A0A075B5S6;P18531	1;1	1;1	1;1	Ig heavy chain V region 3-6	Ighv3-1;Ighv3-6	tr|A0A075B5S6|A0A075B5S6_MOUSE Immunoglobulin heavy variable 3-1 (Fragment) OS=Mus musculus OX=10090 GN=Ighv3-1 PE=4 SV=1;sp|P18531|HVM60_MOUSE Ig heavy chain V region 3-6 OS=Mus musculus OX=10090 GN=Ighv3-6 PE=1 SV=1	2	1	1	1	0	0	0	1	1	0	0	0	0	0	0	0	0	1	1	0	0	0	0	0	0	0	0	1	1	0	0	0	0	0	13.8	13.8	13.8	13.109	116	116;116	3
A0A075B5T2	A0A075B5T2	5	5	3		Ighv6-3	tr|A0A075B5T2|A0A075B5T2_MOUSE Immunoglobulin heavy variable 6-3 (Fragment) OS=Mus musculus OX=10090 GN=Ighv6-3 PE=4 SV=7	1	5	5	3	2	5	0	2	2	0	2	4	2	3	2	5	0	2	2	0	2	4	2	3	2	3	0	1	1	0	1	2	1	1	43.2	43.2	20.3	13.259	118	118	2.63	2
A0A075B5T3;J3QK03;A0A0A6YWS9	A0A075B5T3	4;1;1	2;1;1	2;1;1		Ighv6-6	tr|A0A075B5T3|A0A075B5T3_MOUSE Immunoglobulin heavy variable 6-6 (Fragment) OS=Mus musculus OX=10090 GN=Ighv6-6 PE=4 SV=1	3	4	2	2	3	4	0	1	1	0	2	4	2	4	2	2	0	0	0	0	0	2	2	2	2	2	0	0	0	0	0	2	2	2	41.2	20.2	20.2	13.293	119	119;99;119	2.69
A0A075B5T7;A0A075B5T4	A0A075B5T7;A0A075B5T4	2;1	1;1	1;1		Ighv1-7;Ighv1-4	tr|A0A075B5T7|A0A075B5T7_MOUSE Immunoglobulin heavy variable V1-7 (Fragment) OS=Mus musculus OX=10090 GN=Ighv1-7 PE=4 SV=1;tr|A0A075B5T4|A0A075B5T4_MOUSE Immunoglobulin heavy variable 1-4 (Fragment) OS=Mus musculus OX=10090 GN=Ighv1-4 PE=4 SV=1	2	2	1	1	2	1	0	0	0	0	1	2	0	2	1	1	0	0	0	0	0	1	0	1	1	1	0	0	0	0	0	1	0	1	30.8	17.9	17.9	13.16	117	117;117	3
A0A075B5U4;A0A0A6YXN4	A0A075B5U4;A0A0A6YXN4	3;3	1;1	1;1		Ighv1-18	tr|A0A075B5U4|A0A075B5U4_MOUSE Immunoglobulin heavy variable V1-18 OS=Mus musculus OX=10090 GN=Ighv1-18 PE=1 SV=1;tr|A0A0A6YXN4|A0A0A6YXN4_MOUSE Immunoglobulin heavy variable V1-18 (Fragment) OS=Mus musculus OX=10090 GN=Ighv1-18 PE=1 SV=1	2	3	1	1	2	2	1	1	1	1	1	3	1	2	1	1	0	0	0	0	0	1	0	1	1	1	0	0	0	0	0	1	0	1	31.4	14.7	14.7	11.295	102	102;117	3
A0A075B5U7;P01758	A0A075B5U7	3;1	1;1	1;1		Ighv1-22	tr|A0A075B5U7|A0A075B5U7_MOUSE Immunoglobulin heavy variable 1-22 (Fragment) OS=Mus musculus OX=10090 GN=Ighv1-22 PE=1 SV=1	2	3	1	1	1	2	1	2	2	1	0	1	1	1	0	1	0	0	0	0	0	0	0	0	0	1	0	0	0	0	0	0	0	0	33.3	12.8	12.8	13.022	117	117;117	3
A0A075B5V0	A0A075B5V0	5	1	0		Ighv1-26	tr|A0A075B5V0|A0A075B5V0_MOUSE Immunoglobulin heavy variable 1-26 (Fragment) OS=Mus musculus OX=10090 GN=Ighv1-26 PE=4 SV=1	1	5	1	0	2	3	2	3	3	2	2	3	2	2	1	1	1	1	1	1	0	1	1	1	0	0	0	0	0	0	0	0	0	0	56.4	8.5	0	12.91	117	117	3.15
A0A075B5V5	A0A075B5V5	1	1	1		Ighv1-39	tr|A0A075B5V5|A0A075B5V5_MOUSE Immunoglobulin heavy variable 1-39 (Fragment) OS=Mus musculus OX=10090 GN=Ighv1-39 PE=4 SV=1	1	1	1	1	0	1	0	0	0	0	0	0	0	0	0	1	0	0	0	0	0	0	0	0	0	1	0	0	0	0	0	0	0	0	12.8	12.8	12.8	12.93	117	117	3
A0A075B5V6;A0A0A6YY38	A0A075B5V6;A0A0A6YY38	4;3	1;1	1;1		Ighv1-42	tr|A0A075B5V6|A0A075B5V6_MOUSE Immunoglobulin heavy variable V1-42 OS=Mus musculus OX=10090 GN=Ighv1-42 PE=1 SV=1;tr|A0A0A6YY38|A0A0A6YY38_MOUSE Immunoglobulin heavy variable V1-42 (Fragment) OS=Mus musculus OX=10090 GN=Ighv1-42 PE=1 SV=1	2	4	1	1	1	2	1	2	2	0	2	2	1	1	0	1	0	0	0	0	0	0	0	0	0	1	0	0	0	0	0	0	0	0	61.2	20.4	20.4	10.776	98	98;117	3
A0A075B5V8;A0A0A6YY41	A0A075B5V8;A0A0A6YY41	2;1	1;1	1;1		Ighv1-47	tr|A0A075B5V8|A0A075B5V8_MOUSE Immunoglobulin heavy variable 1-47 OS=Mus musculus OX=10090 GN=Ighv1-47 PE=4 SV=1;tr|A0A0A6YY41|A0A0A6YY41_MOUSE Immunoglobulin heavy variable 1-47 (Fragment) OS=Mus musculus OX=10090 GN=Ighv1-47 PE=4 SV=1	2	2	1	1	0	1	0	0	0	0	0	1	0	0	0	1	0	0	0	0	0	0	0	0	0	1	0	0	0	0	0	0	0	0	34.7	15.3	15.3	11.083	98	98;117	3
A0A075B5W2;A0A0A6YXC3	A0A075B5W2;A0A0A6YXC3	3;3	1;1	1;1		Ighv1-52	tr|A0A075B5W2|A0A075B5W2_MOUSE Immunoglobulin heavy variable 1-52 OS=Mus musculus OX=10090 GN=Ighv1-52 PE=4 SV=1;tr|A0A0A6YXC3|A0A0A6YXC3_MOUSE Immunoglobulin heavy variable 1-52 (Fragment) OS=Mus musculus OX=10090 GN=Ighv1-52 PE=4 SV=1	2	3	1	1	1	1	0	0	0	0	2	3	0	2	0	1	0	0	0	0	0	1	0	1	0	1	0	0	0	0	0	1	0	1	40.5	21.6	21.6	12.989	116	116;117	3
A0A075B5W3	A0A075B5W3	5	1	1		Ighv1-53	tr|A0A075B5W3|A0A075B5W3_MOUSE Immunoglobulin heavy variable 1-53 (Fragment) OS=Mus musculus OX=10090 GN=Ighv1-53 PE=4 SV=1	1	5	1	1	2	0	0	0	0	0	4	4	0	2	1	0	0	0	0	0	0	0	0	1	1	0	0	0	0	0	0	0	0	1	43.6	21.4	21.4	12.791	117	117	3
A0A075B5W4;A0A0A6YXA3;A0A075B678;A0A075B5X1;A0A075B5Y0;A0A0G2JET1;A0A0A6YY60;A0A075B5X4	A0A075B5W4;A0A0A6YXA3;A0A075B678;A0A075B5X1;A0A075B5Y0;A0A0G2JET1;A0A0A6YY60;A0A075B5X4	2;2;1;1;1;1;1;1	2;2;1;1;1;1;1;1	2;2;1;1;1;1;1;1		Ighv8-6;Ighv8-14;Ighv8-9;Ighv8-13;Ighv8-5;Ighv8-11	tr|A0A075B5W4|A0A075B5W4_MOUSE Immunoglobulin heavy variable V8-6 OS=Mus musculus OX=10090 GN=Ighv8-6 PE=4 SV=1;tr|A0A0A6YXA3|A0A0A6YXA3_MOUSE Immunoglobulin heavy variable V8-6 (Fragment) OS=Mus musculus OX=10090 GN=Ighv8-6 PE=4 SV=1;tr|A0A075B678|A0A075B	8	2	2	2	0	1	0	1	1	0	0	0	0	0	0	1	0	1	1	0	0	0	0	0	0	1	0	1	1	0	0	0	0	0	26	26	26	11.279	100	100;118;99;100;101;119;119;119	1.75	2
A0A075B5W5	A0A075B5W5	1	1	1		Ighv1-54	tr|A0A075B5W5|A0A075B5W5_MOUSE Immunoglobulin heavy variable V1-54 (Fragment) OS=Mus musculus OX=10090 GN=Ighv1-54 PE=4 SV=1	1	1	1	1	0	1	0	1	0	0	0	1	0	0	0	1	0	1	0	0	0	1	0	0	0	1	0	1	0	0	0	1	0	0	12.8	12.8	12.8	12.75	117	117	3
A0A075B5W6	A0A075B5W6	1	1	1		Ighv1-55	tr|A0A075B5W6|A0A075B5W6_MOUSE Immunoglobulin heavy variable 1-55 (Fragment) OS=Mus musculus OX=10090 GN=Ighv1-55 PE=1 SV=1	1	1	1	1	1	1	0	0	0	0	0	1	0	0	1	1	0	0	0	0	0	1	0	0	1	1	0	0	0	0	0	1	0	0	21.4	21.4	21.4	12.687	117	117	3
A0A075B5X3	A0A075B5X3	5	1	1		Ighv1-64	tr|A0A075B5X3|A0A075B5X3_MOUSE Immunoglobulin heavy variable 1-64 (Fragment) OS=Mus musculus OX=10090 GN=Ighv1-64 PE=4 SV=1	1	5	1	1	1	0	0	0	0	0	5	4	0	1	0	0	0	0	0	0	1	0	0	0	0	0	0	0	0	0	1	0	0	0	43.6	21.4	21.4	12.922	117	117	3
A0A075B5X7;A0A0G2JFS5;A0A075B5W1	A0A075B5X7;A0A0G2JFS5;A0A075B5W1	2;2;1	1;1;1	1;1;1		Ighv1-69;Ighv1-50	tr|A0A075B5X7|A0A075B5X7_MOUSE Immunoglobulin heavy variable 1-69 OS=Mus musculus OX=10090 GN=Ighv1-69 PE=4 SV=1;tr|A0A0G2JFS5|A0A0G2JFS5_MOUSE Immunoglobulin heavy variable 1-69 (Fragment) OS=Mus musculus OX=10090 GN=Ighv1-69 PE=4 SV=1;tr|A0A075B5W1|A0A07	3	2	1	1	2	0	0	0	0	0	1	2	0	2	1	0	0	0	0	0	0	1	0	1	1	0	0	0	0	0	0	1	0	1	34.5	21.6	21.6	12.891	116	116;117;117	3
A0A075B5Y1;A0A0G2JGK2;P01750	A0A075B5Y1;A0A0G2JGK2;P01750	3;3;3	1;1;1	1;1;1	Ig heavy chain V region 102	Ighv1-74	tr|A0A075B5Y1|A0A075B5Y1_MOUSE Immunoglobulin heavy variable V1-74 OS=Mus musculus OX=10090 GN=Ighv1-74 PE=4 SV=1;tr|A0A0G2JGK2|A0A0G2JGK2_MOUSE Immunoglobulin heavy variable V1-74 (Fragment) OS=Mus musculus OX=10090 GN=Ighv1-74 PE=4 SV=1;sp|P01750|HVM06_M	3	3	1	1	1	1	0	0	0	0	2	2	0	1	0	1	0	0	0	0	0	0	0	0	0	1	0	0	0	0	0	0	0	0	29.3	10.3	10.3	12.9	116	116;117;117	3
A0A075B5Y3	A0A075B5Y3	2	2	2		Ighv1-80	tr|A0A075B5Y3|A0A075B5Y3_MOUSE Immunoglobulin heavy variable 1-80 (Fragment) OS=Mus musculus OX=10090 GN=Ighv1-80 PE=1 SV=1	1	2	2	2	0	2	0	0	0	0	0	0	0	0	0	2	0	0	0	0	0	0	0	0	0	2	0	0	0	0	0	0	0	0	29.9	29.9	29.9	12.763	117	117	3
A0A075B5Y4	A0A075B5Y4	2	1	1		Ighv1-81	tr|A0A075B5Y4|A0A075B5Y4_MOUSE Immunoglobulin heavy variable 1-81 (Fragment) OS=Mus musculus OX=10090 GN=Ighv1-81 PE=4 SV=1	1	2	1	1	2	2	1	1	1	2	1	2	2	2	1	1	0	0	0	1	1	1	1	1	1	1	0	0	0	1	1	1	1	1	20.5	12	12	12.989	117	117	3
A0A075B5Y5;A0A075B5X5	A0A075B5Y5;A0A075B5X5	2;1	1;1	1;1		Ighv1-84;Ighv1-66	tr|A0A075B5Y5|A0A075B5Y5_MOUSE Immunoglobulin heavy variable 1-84 (Fragment) OS=Mus musculus OX=10090 GN=Ighv1-84 PE=4 SV=1;tr|A0A075B5X5|A0A075B5X5_MOUSE Immunoglobulin heavy variable 1-66 (Fragment) OS=Mus musculus OX=10090 GN=Ighv1-66 PE=4 SV=1	2	2	1	1	1	2	0	0	0	0	1	1	1	1	0	1	0	0	0	0	0	0	0	0	0	1	0	0	0	0	0	0	0	0	30.8	17.9	17.9	12.967	117	117;117	3
A0A075B5Y6	A0A075B5Y6	1	1	1		Ighv1-85	tr|A0A075B5Y6|A0A075B5Y6_MOUSE Immunoglobulin heavy variable 1-85 (Fragment) OS=Mus musculus OX=10090 GN=Ighv1-85 PE=4 SV=1	1	1	1	1	0	1	0	0	0	0	0	1	0	1	0	1	0	0	0	0	0	1	0	1	0	1	0	0	0	0	0	1	0	1	13.7	13.7	13.7	13.012	117	117	3
A0A075B664;A0A075B663;P01728;P01723;P01729;P01727;P01726	A0A075B664;A0A075B663;P01728;P01723;P01729;P01727;P01726	1;1;1;1;1;1;1	1;1;1;1;1;1;1	1;1;1;1;1;1;1	Ig lambda-2 chain V region;Ig lambda-1 chain V region;Ig lambda-2 chain V region MOPC 315;Ig lambda-1 chain V region S43;Ig lambda-1 chain V region H2020	Iglv2;Iglv1	tr|A0A075B664|A0A075B664_MOUSE Immunoglobulin lambda variable 2 OS=Mus musculus OX=10090 GN=Iglv2 PE=1 SV=1;tr|A0A075B663|A0A075B663_MOUSE Immunoglobulin lambda variable 1 (Fragment) OS=Mus musculus OX=10090 GN=Iglv1 PE=4 SV=1;sp|P01728|LV2A_MOUSE Ig lambd	7	1	1	1	1	1	1	0	0	1	1	1	1	1	1	1	1	0	0	1	1	1	1	1	1	1	1	0	0	1	1	1	1	1	7.8	7.8	7.8	12.165	116	116;117;117;117;129;129;129	4.89
A0A075B674;A0A0G2JGN3	A0A075B674;A0A0G2JGN3	1;1	1;1	1;1		Ighv1-78	tr|A0A075B674|A0A075B674_MOUSE Immunoglobulin heavy variable 1-78 OS=Mus musculus OX=10090 GN=Ighv1-78 PE=1 SV=1;tr|A0A0G2JGN3|A0A0G2JGN3_MOUSE Immunoglobulin heavy variable 1-78 (Fragment) OS=Mus musculus OX=10090 GN=Ighv1-78 PE=1 SV=1	2	1	1	1	0	1	0	0	0	0	1	1	0	1	0	1	0	0	0	0	1	1	0	1	0	1	0	0	0	0	1	1	0	1	16.3	16.3	16.3	11.047	98	98;117	3
A0A075B677	A0A075B677	1	1	1		Igkv4-53	tr|A0A075B677|A0A075B677_MOUSE Immunoglobulin kappa variable 4-53 OS=Mus musculus OX=10090 GN=Igkv4-53 PE=1 SV=1	1	1	1	1	0	1	0	0	0	0	1	0	0	0	0	1	0	0	0	0	1	0	0	0	0	1	0	0	0	0	1	0	0	0	18.6	18.6	18.6	10.366	97	97	5
A0A075B680;A0A0G2JFL3;A0A0A6YXZ4	A0A075B680;A0A0G2JFL3;A0A0A6YXZ4	2;1;1	2;1;1	1;1;1		Ighv1-62-2	tr|A0A075B680|A0A075B680_MOUSE Immunoglobulin heavy variable 1-62-2 OS=Mus musculus OX=10090 GN=Ighv1-62-2 PE=4 SV=1;tr|A0A0G2JFL3|A0A0G2JFL3_MOUSE Immunoglobulin heavy variable 1-71 (Fragment) OS=Mus musculus OX=10090 GN=Ighv1-71 PE=4 SV=1;tr|A0A0A6YXZ4|A	3	2	2	1	1	1	0	0	0	0	0	2	0	1	1	1	0	0	0	0	0	2	0	1	1	1	0	0	0	0	0	1	0	1	38	38	19	11.224	100	100;119;119	3
A0A075B6D5;A0A0G2JFZ3	A0A075B6D5;A0A0G2JFZ3	1;1	1;1	1;1		Igkv19-93	tr|A0A075B6D5|A0A075B6D5_MOUSE Immunoglobulin kappa chain variable 19-93 OS=Mus musculus OX=10090 GN=Igkv19-93 PE=1 SV=7;tr|A0A0G2JFZ3|A0A0G2JFZ3_MOUSE Immunoglobulin kappa chain variable 19-93 (Fragment) OS=Mus musculus OX=10090 GN=Igkv19-93 PE=1 SV=4	2	1	1	1	1	1	0	0	0	0	1	1	0	1	1	1	0	0	0	0	1	1	0	1	1	1	0	0	0	0	1	1	0	1	14	14	14	12.734	114	114;115	5
Q91Z67;A0A087WSQ1;A0A087WNM1;A0A087WS59;Q91Z69;A0A087WS73;D3YZW1	Q91Z67;A0A087WSQ1;A0A087WNM1;A0A087WS59	3;3;3;2;1;1;1	3;3;3;2;1;1;1	3;3;3;2;1;1;1	SLIT-ROBO Rho GTPase-activating protein 2	Srgap2	sp|Q91Z67|SRGP2_MOUSE SLIT-ROBO Rho GTPase-activating protein 2 OS=Mus musculus OX=10090 GN=Srgap2 PE=1 SV=2;tr|A0A087WSQ1|A0A087WSQ1_MOUSE SLIT-ROBO Rho GTPase-activating protein 2 (Fragment) OS=Mus musculus OX=10090 GN=Srgap2 PE=1 SV=1;tr|A0A087WNM1|A0A0	7	3	3	3	0	0	0	0	0	0	0	0	2	2	0	0	0	0	0	0	0	0	2	2	0	0	0	0	0	0	0	0	2	2	2.9	2.9	2.9	120.8	1071	1071;649;858;451;1062;267;1085	1	4
Q810U3;A0A087WNW2;E9Q171;A0A087WR56;E9PW06;A0A087WPX3	Q810U3;A0A087WNW2;E9Q171;A0A087WR56;E9PW06;A0A087WPX3	5;5;5;5;5;5	5;5;5;5;5;5	5;5;5;5;5;5	Neurofascin	Nfasc	sp|Q810U3|NFASC_MOUSE Neurofascin OS=Mus musculus OX=10090 GN=Nfasc PE=1 SV=1;tr|A0A087WNW2|A0A087WNW2_MOUSE Neurofascin OS=Mus musculus OX=10090 GN=Nfasc PE=1 SV=1;tr|E9Q171|E9Q171_MOUSE Neurofascin OS=Mus musculus OX=10090 GN=Nfasc PE=1 SV=1;tr|A0A087WR5	6	5	5	5	0	0	0	0	0	0	0	5	0	4	0	0	0	0	0	0	0	5	0	4	0	0	0	0	0	0	0	5	0	4	5.6	5.6	5.6	137.97	1240	1240;899;1157;1159;1174;1347	1	9
Q61290;A0A571BF18;A0A087WS83;P97445;E9Q1R5;A0A1L1SQZ2;A0A571BET0	Q61290;A0A571BF18;A0A087WS83;P97445;E9Q1R5;A0A1L1SQZ2;A0A571BET0	2;2;2;1;1;1;1	2;2;2;1;1;1;1	2;2;2;1;1;1;1	Voltage-dependent R-type calcium channel subunit alpha-1E;Voltage-dependent P/Q-type calcium channel subunit alpha-1A	Cacna1e;Cacna1a	sp|Q61290|CAC1E_MOUSE Voltage-dependent R-type calcium channel subunit alpha-1E OS=Mus musculus OX=10090 GN=Cacna1e PE=1 SV=1;tr|A0A571BF18|A0A571BF18_MOUSE Voltage-dependent R-type calcium channel subunit alpha (Fragment) OS=Mus musculus OX=10090 GN=Cacna	7	2	2	2	0	0	1	0	0	0	1	1	1	0	0	0	1	0	0	0	1	1	1	0	0	0	1	0	0	0	1	1	1	0	1	1	1	257.23	2272	2272;585;2273;2368;2321;2321;2457	1	4
P68368;A0A0A0MQA5;A0A087WQS4;A0A087WRB4;Q3UX10;A0A087WSB0;A0A087WSL5	P68368;A0A0A0MQA5	14;14;4;3;2;2;2	3;3;2;1;0;1;1	3;3;2;1;0;1;1	Tubulin alpha-4A chain	Tuba4a	sp|P68368|TBA4A_MOUSE Tubulin alpha-4A chain OS=Mus musculus OX=10090 GN=Tuba4a PE=1 SV=1;tr|A0A0A0MQA5|A0A0A0MQA5_MOUSE Tubulin alpha chain (Fragment) OS=Mus musculus OX=10090 GN=Tuba4a PE=1 SV=1	7	14	3	3	11	10	9	8	4	2	11	10	9	11	3	2	1	1	0	0	2	2	2	3	3	2	1	1	0	0	2	2	2	3	40	7.6	7.6	49.924	448	448;477;125;100;446;81;89	3
A0A0A0MQC1	A0A0A0MQC1	1	1	1		Ighv3-5	tr|A0A0A0MQC1|A0A0A0MQC1_MOUSE Immunoglobulin heavy variable 3-5 OS=Mus musculus OX=10090 GN=Ighv3-5 PE=1 SV=1	1	1	1	1	1	1	0	0	0	0	1	0	1	0	1	1	0	0	0	0	1	0	1	0	1	1	0	0	0	0	1	0	1	0	13.1	13.1	13.1	11.277	99	99	3
P10637;B1AQW2;A0A0A0MQC7;A2A5Y6	P10637;B1AQW2;A0A0A0MQC7;A2A5Y6	2;2;2;2	2;2;2;2	2;2;2;2	Microtubule-associated protein tau;Microtubule-associated protein	Mapt	sp|P10637|TAU_MOUSE Microtubule-associated protein tau OS=Mus musculus OX=10090 GN=Mapt PE=1 SV=3;tr|B1AQW2|B1AQW2_MOUSE Microtubule-associated protein OS=Mus musculus OX=10090 GN=Mapt PE=1 SV=1;tr|A0A0A0MQC7|A0A0A0MQC7_MOUSE Microtubule-associated protein	4	2	2	2	0	0	1	0	0	0	0	0	0	1	0	0	1	0	0	0	0	0	0	1	0	0	1	0	0	0	0	0	0	1	3	3	3	76.243	733	733;390;733;749	3
P16858;A0A0A0MQF6;S4R1W1;A0A1D5RLD8;S4R257;S4R1W8;Q64467;V9GX06;A0A0R4J0X7;S4R2G5;V9GXA7	P16858;A0A0A0MQF6;S4R1W1;A0A1D5RLD8;S4R257	15;15;14;14;13;4;2;2;2;2;1	15;15;14;14;13;4;2;2;2;2;1	15;15;14;14;13;4;2;2;2;2;1	Glyceraldehyde-3-phosphate dehydrogenase	Gapdh;Gm3839	sp|P16858|G3P_MOUSE Glyceraldehyde-3-phosphate dehydrogenase OS=Mus musculus OX=10090 GN=Gapdh PE=1 SV=2;tr|A0A0A0MQF6|A0A0A0MQF6_MOUSE Glyceraldehyde-3-phosphate dehydrogenase OS=Mus musculus OX=10090 GN=Gapdh PE=1 SV=1;tr|S4R1W1|S4R1W1_MOUSE Glyceraldehy	11	15	15	15	8	6	10	8	6	3	13	13	11	11	8	6	10	8	6	3	13	13	11	11	8	6	10	8	6	3	13	13	11	11	49.8	49.8	49.8	35.81	333	333;359;333;333;280;55;440;183;438;440;121	3.93	5
Q62261;A0A0A0MQG2	Q62261;A0A0A0MQG2	9;9	9;9	9;9	Spectrin beta chain, non-erythrocytic 1	Sptbn1	sp|Q62261|SPTB2_MOUSE Spectrin beta chain, non-erythrocytic 1 OS=Mus musculus OX=10090 GN=Sptbn1 PE=1 SV=2;tr|A0A0A0MQG2|A0A0A0MQG2_MOUSE Spectrin beta chain, non-erythrocytic 1 (Fragment) OS=Mus musculus OX=10090 GN=Sptbn1 PE=1 SV=1	2	9	9	9	2	3	1	1	2	0	2	5	4	8	2	3	1	1	2	0	2	5	4	8	2	3	1	1	2	0	2	5	4	8	4.8	4.8	4.8	274.22	2363	2363;2092	1	28
O54829;Q45FE1;Q45FE2;Q80XD3;A0A0A6YW36;Q9Z2H2;A0A0J9YTS6;A0A087WSJ9;A0A087WSH2;A0A087WPW1;F6WDS8;A0A087WQG6;A0A087WNZ9;A0A087WRP8;A0A087WPC4;A0A087WPD1	O54829;Q45FE1;Q45FE2;Q80XD3;A0A0A6YW36;Q9Z2H2;A0A0J9YTS6;A0A087WSJ9;A0A087WSH2;A0A087WPW1;F6WDS8;A0A087WQG6;A0A087WNZ9;A0A087WRP8;A0A087WPC4;A0A087WPD1	2;2;2;2;2;1;1;1;1;1;1;1;1;1;1;1	2;2;2;2;2;1;1;1;1;1;1;1;1;1;1;1	2;2;2;2;2;1;1;1;1;1;1;1;1;1;1;1	Regulator of G-protein signaling 7;Regulator of G-protein signaling 6	Rgs7;Rgs6	sp|O54829|RGS7_MOUSE Regulator of G-protein signaling 7 OS=Mus musculus OX=10090 GN=Rgs7 PE=1 SV=2;tr|Q45FE1|Q45FE1_MOUSE Regulator of G-protein signaling 7 isoform B (Fragment) OS=Mus musculus OX=10090 GN=Rgs7 PE=1 SV=1;tr|Q45FE2|Q45FE2_MOUSE Regulator of	16	2	2	2	0	0	0	0	0	0	1	1	0	1	0	0	0	0	0	0	1	1	0	1	0	0	0	0	0	0	1	1	0	1	4.7	4.7	4.7	54.791	469	469;178;191;470;477;472;221;435;437;453;456;465;490;495;502;505	3
P0CG50;P0CG49;P62983;P62984;A0A0A6YW67;E9Q9J0;E9Q4P0;E9Q5F6;E9QNP0;Q5SX22	P0CG50;P0CG49;P62983;P62984;A0A0A6YW67;E9Q9J0;E9Q4P0;E9Q5F6;E9QNP0;Q5SX22	3;3;3;3;3;3;3;3;3;3	3;3;3;3;3;3;3;3;3;3	3;3;3;3;3;3;3;3;3;3	Polyubiquitin-C;Ubiquitin;Ubiquitin-related 1;Ubiquitin-related 2;Polyubiquitin-B;Ubiquitin;Ubiquitin-40S ribosomal protein S27a;Ubiquitin;40S ribosomal protein S27a;Ubiquitin-60S ribosomal protein L40;Ubiquitin;60S ribosomal protein L40	Ubc;Ubb;Rps27a;Uba52;Gm8797;Kxd1	sp|P0CG50|UBC_MOUSE Polyubiquitin-C OS=Mus musculus OX=10090 GN=Ubc PE=1 SV=2;sp|P0CG49|UBB_MOUSE Polyubiquitin-B OS=Mus musculus OX=10090 GN=Ubb PE=2 SV=1;sp|P62983|RS27A_MOUSE Ubiquitin-40S ribosomal protein S27a OS=Mus musculus OX=10090 GN=Rps27a PE=1 S	10	3	3	3	0	0	2	2	1	0	1	2	1	1	0	0	2	2	1	0	1	2	1	1	0	0	2	2	1	0	1	2	1	1	41.7	41.7	41.7	82.549	734	734;305;156;128;77;96;193;201;232;236	2.45	8
Q3UHL1;A0A0A6YW88;A0A0A6YXI7;A0A0A6YW08	Q3UHL1;A0A0A6YW88	7;7;1;1	7;7;1;1	7;7;1;1	CaM kinase-like vesicle-associated protein	Camkv	sp|Q3UHL1|CAMKV_MOUSE CaM kinase-like vesicle-associated protein OS=Mus musculus OX=10090 GN=Camkv PE=1 SV=2;tr|A0A0A6YW88|A0A0A6YW88_MOUSE CaM kinase-like vesicle-associated protein OS=Mus musculus OX=10090 GN=Camkv PE=1 SV=1	4	7	7	7	0	0	1	1	1	0	6	5	3	4	0	0	1	1	1	0	6	5	3	4	0	0	1	1	1	0	6	5	3	4	21.1	21.1	21.1	54.819	512	512;484;48;66	1.95	1
A0A0A6YW96	A0A0A6YW96	1	1	1		Aif1l	tr|A0A0A6YW96|A0A0A6YW96_MOUSE Allograft inflammatory factor 1-like (Fragment) OS=Mus musculus OX=10090 GN=Aif1l PE=1 SV=1	1	1	1	1	0	0	0	0	0	0	0	0	0	1	0	0	0	0	0	0	0	0	0	1	0	0	0	0	0	0	0	0	0	1	21.6	21.6	21.6	4.213	37	37	2
Q61137;Q3TPU9;A0A0A6YXJ4;A0A0A6YWE6	Q61137;Q3TPU9;A0A0A6YXJ4;A0A0A6YWE6	2;2;2;2	2;2;2;2	2;2;2;2	Astrotactin-1	Astn1	sp|Q61137|ASTN1_MOUSE Astrotactin-1 OS=Mus musculus OX=10090 GN=Astn1 PE=1 SV=4;tr|Q3TPU9|Q3TPU9_MOUSE Astrotactin-1 OS=Mus musculus OX=10090 GN=Astn1 PE=1 SV=1;tr|A0A0A6YXJ4|A0A0A6YXJ4_MOUSE Astrotactin-1 OS=Mus musculus OX=10090 GN=Astn1 PE=1 SV=1;tr|A0A	4	2	2	2	0	0	0	0	0	0	2	1	0	0	0	0	0	0	0	0	2	1	0	0	0	0	0	0	0	0	2	1	0	0	1.8	1.8	1.8	144.88	1302	1302;840;893;1172	4
A0A0A6YWU3	A0A0A6YWU3	2	1	1		Ighv6-7	tr|A0A0A6YWU3|A0A0A6YWU3_MOUSE Immunoglobulin heavy variable V6-7 (Fragment) OS=Mus musculus OX=10090 GN=Ighv6-7 PE=4 SV=1	1	2	1	1	0	1	0	0	0	0	0	2	1	2	0	0	0	0	0	0	0	1	0	1	0	0	0	0	0	0	0	1	0	1	21.8	12.6	12.6	13.658	119	119	1.33	2
A0A0A6YXA5	A0A0A6YXA5	2	1	1		Ighv1-15	tr|A0A0A6YXA5|A0A0A6YXA5_MOUSE Immunoglobulin heavy variable 1-15 (Fragment) OS=Mus musculus OX=10090 GN=Ighv1-15 PE=4 SV=1	1	2	1	1	1	2	1	1	1	1	0	1	1	1	0	1	0	0	0	0	0	0	0	0	0	1	0	0	0	0	0	0	0	0	29.9	21.4	21.4	12.953	117	117	3
P13595;E9Q589;A0A0A6YY47;E9QB01;A0A0A6YY91;A0A0A6YWU2	P13595;E9Q589;A0A0A6YY47;E9QB01;A0A0A6YY91;A0A0A6YWU2	5;5;5;5;5;4	5;5;5;5;5;4	5;5;5;5;5;4	Neural cell adhesion molecule 1	Ncam1	sp|P13595|NCAM1_MOUSE Neural cell adhesion molecule 1 OS=Mus musculus OX=10090 GN=Ncam1 PE=1 SV=3;tr|E9Q589|E9Q589_MOUSE Neural cell adhesion molecule 1 OS=Mus musculus OX=10090 GN=Ncam1 PE=1 SV=1;tr|A0A0A6YY47|A0A0A6YY47_MOUSE Neural cell adhesion molecul	6	5	5	5	0	0	0	0	0	0	0	5	0	2	0	0	0	0	0	0	0	5	0	2	0	0	0	0	0	0	0	5	0	2	7.4	7.4	7.4	119.43	1115	1115;725;848;849;1089;605	1	8
F6TQW2;A0A0A6YY53;P01864	F6TQW2;A0A0A6YY53;P01864	9;9;5	7;7;3	7;7;3	Ig gamma-2A chain C region secreted form	Ighg2c	tr|F6TQW2|F6TQW2_MOUSE Immunoglobulin heavy constant gamma 2C (Fragment) OS=Mus musculus OX=10090 GN=Ighg2c PE=1 SV=2;tr|A0A0A6YY53|A0A0A6YY53_MOUSE Immunoglobulin heavy constant gamma 2C (Fragment) OS=Mus musculus OX=10090 GN=Ighg2c PE=1 SV=1;sp|P01864|GC	3	9	7	7	7	5	7	8	8	6	8	4	7	7	6	4	6	7	7	5	6	3	6	5	6	4	6	7	7	5	6	3	6	5	33.4	28.7	28.7	44.095	404	404;335;335	3.11	13
A0A0A6YYE7;A0A0B4J1I3;A0A0A6YYE5;A0A075B5M4;A0A075B5L8	A0A0A6YYE7;A0A0B4J1I3;A0A0A6YYE5;A0A075B5M4;A0A075B5L8	2;1;1;1;1	1;1;1;1;1	1;1;1;1;1		Igkv4-57;Igkv4-74;Igkv4-78;Igkv4-57-1;Igkv4-79	tr|A0A0A6YYE7|A0A0A6YYE7_MOUSE Immunoglobulin kappa variable 4-57 (Fragment) OS=Mus musculus OX=10090 GN=Igkv4-57 PE=4 SV=2;tr|A0A0B4J1I3|A0A0B4J1I3_MOUSE Immunoglobulin kappa variable 4-74 (Fragment) OS=Mus musculus OX=10090 GN=Igkv4-74 PE=4 SV=1;tr|A0A0A	5	2	1	1	1	2	1	1	0	0	1	2	1	2	0	1	1	1	0	0	0	1	0	1	0	1	1	1	0	0	0	1	0	1	27.4	13.7	13.7	12.689	117	117;119;119;119;119	5
A0A0B4J1H6;P01630	A0A0B4J1H6;P01630	2;2	2;2	2;2	Ig kappa chain V-II region 7S34.1	Igkv2-137	tr|A0A0B4J1H6|A0A0B4J1H6_MOUSE Immunoglobulin kappa chain variable 2-137 (Fragment) OS=Mus musculus OX=10090 GN=Igkv2-137 PE=4 SV=1;sp|P01630|KV2A6_MOUSE Ig kappa chain V-II region 7S34.1 OS=Mus musculus OX=10090 PE=1 SV=1	2	2	2	2	1	2	0	0	0	0	0	1	1	2	1	2	0	0	0	0	0	1	1	2	1	2	0	0	0	0	0	1	1	2	20	20	20	13.131	120	120;113	5
A0A0B4J1H8;A0A0B4J1H7	A0A0B4J1H8;A0A0B4J1H7	4;4	4;4	4;4		Igkv1-133;Igkv1-135	tr|A0A0B4J1H8|A0A0B4J1H8_MOUSE Immunoglobulin kappa variable 1-133 (Fragment) OS=Mus musculus OX=10090 GN=Igkv1-133 PE=4 SV=1;tr|A0A0B4J1H7|A0A0B4J1H7_MOUSE Immunoglobulin kappa variable 1-135 (Fragment) OS=Mus musculus OX=10090 GN=Igkv1-135 PE=4 SV=1	2	4	4	4	1	4	0	2	2	1	1	2	3	1	1	4	0	2	2	1	1	2	3	1	1	4	0	2	2	1	1	2	3	1	30	30	30	13.237	120	120;120	5
A0A0B4J1I1	A0A0B4J1I1	1	1	1		Igkv16-104	tr|A0A0B4J1I1|A0A0B4J1I1_MOUSE Immunoglobulin kappa variable 16-104 (Fragment) OS=Mus musculus OX=10090 GN=Igkv16-104 PE=4 SV=1	1	1	1	1	0	1	0	1	0	0	0	1	0	1	0	1	0	1	0	0	0	1	0	1	0	1	0	1	0	0	0	1	0	1	13.8	13.8	13.8	12.874	116	116	5
A0A0B4J1I9;A0A0B4J1I4;P04945	A0A0B4J1I9;A0A0B4J1I4;P04945	2;1;1	2;1;1	1;0;1	Ig kappa chain V-VI region NQ2-6.1	Igkv4-55;Igkv4-72	tr|A0A0B4J1I9|A0A0B4J1I9_MOUSE Immunoglobulin kappa variable 4-55 (Fragment) OS=Mus musculus OX=10090 GN=Igkv4-55 PE=1 SV=1;tr|A0A0B4J1I4|A0A0B4J1I4_MOUSE Immunoglobulin kappa chain variable 4-72 (Fragment) OS=Mus musculus OX=10090 GN=Igkv4-72 PE=4 SV=1;sp	3	2	2	1	2	2	1	1	1	0	2	2	2	2	2	2	1	1	1	0	2	2	2	2	1	1	1	1	1	0	1	1	1	1	27.4	27.4	13.7	12.736	117	117;117;108	5
A0A0B4J1J5	A0A0B4J1J5	2	2	2		Ighv9-3	tr|A0A0B4J1J5|A0A0B4J1J5_MOUSE Immunoglobulin heavy variable V9-3 (Fragment) OS=Mus musculus OX=10090 GN=Ighv9-3 PE=1 SV=1	1	2	2	2	0	2	0	0	0	0	0	2	0	2	0	2	0	0	0	0	0	2	0	2	0	2	0	0	0	0	0	2	0	2	30.8	30.8	30.8	12.996	117	117	3
A0A0B4J1J7;A0A0G2JEU7	A0A0B4J1J7;A0A0G2JEU7	3;3	2;2	2;2		Ighv1-82	tr|A0A0B4J1J7|A0A0B4J1J7_MOUSE Immunoglobulin heavy variable 1-82 OS=Mus musculus OX=10090 GN=Ighv1-82 PE=1 SV=1;tr|A0A0G2JEU7|A0A0G2JEU7_MOUSE Immunoglobulin heavy variable 1-82 (Fragment) OS=Mus musculus OX=10090 GN=Ighv1-82 PE=1 SV=1	2	3	2	2	0	2	1	0	0	1	0	3	0	2	0	1	0	0	0	0	0	2	0	1	0	1	0	0	0	0	0	2	0	1	35.7	28.6	28.6	10.65	98	98;117	3
A0A0B4J1M0;A0A0G2JGS9	A0A0B4J1M0;A0A0G2JGS9	2;2	1;1	1;1		Ighv1-77	tr|A0A0B4J1M0|A0A0B4J1M0_MOUSE Immunoglobulin heavy variable 1-77 OS=Mus musculus OX=10090 GN=Ighv1-77 PE=1 SV=1;tr|A0A0G2JGS9|A0A0G2JGS9_MOUSE Immunoglobulin heavy variable 1-77 (Fragment) OS=Mus musculus OX=10090 GN=Ighv1-77 PE=1 SV=1	2	2	1	1	1	2	0	0	0	0	1	1	1	1	0	1	0	0	0	0	0	0	0	0	0	1	0	0	0	0	0	0	0	0	28.6	13.3	13.3	10.662	98	98;117	3
A0A0B4J1N0;A0A0G2JFE9	A0A0B4J1N0;A0A0G2JFE9	4;4	4;4	3;3		Ighv1-76	tr|A0A0B4J1N0|A0A0B4J1N0_MOUSE Immunoglobulin heavy variable 1-76 OS=Mus musculus OX=10090 GN=Ighv1-76 PE=1 SV=1;tr|A0A0G2JFE9|A0A0G2JFE9_MOUSE Immunoglobulin heavy variable 1-76 (Fragment) OS=Mus musculus OX=10090 GN=Ighv1-76 PE=1 SV=1	2	4	4	3	2	4	0	0	0	0	1	2	2	3	2	4	0	0	0	0	1	2	2	3	1	3	0	0	0	0	0	1	1	2	55.1	55.1	39.8	10.879	98	98;117	3.12
A0A0G2JDL9;Q99JI6;P62835;A0A1W2P777;A0A0G2JED9;A0A0G2JE52	A0A0G2JDL9;Q99JI6;P62835	3;2;2;1;1;1	3;2;2;1;1;1	2;2;2;1;1;1	Ras-related protein Rap-1b;Ras-related protein Rap-1A	Rap1b;Rap1a	tr|A0A0G2JDL9|A0A0G2JDL9_MOUSE Ras-related protein Rap-1A OS=Mus musculus OX=10090 GN=Rap1a PE=1 SV=1;sp|Q99JI6|RAP1B_MOUSE Ras-related protein Rap-1b OS=Mus musculus OX=10090 GN=Rap1b PE=1 SV=2;sp|P62835|RAP1A_MOUSE Ras-related protein Rap-1A OS=Mus muscu	6	3	3	2	0	1	0	0	0	0	2	3	0	0	0	1	0	0	0	0	2	3	0	0	0	1	0	0	0	0	1	2	0	0	27.1	27.1	19.5	13.426	118	118;184;184;53;109;159	5
P27546;A0A0G2JFK3;A0A0G2JDY5;A0A0G2JFT4;A0A0G2JG35;A0A140T8T5;A0A0G2JDN7;E9PZ43;A0A0G2JE57;A0A0G2JDU1;A0A0G2JFH2	P27546;A0A0G2JFK3;A0A0G2JDY5;A0A0G2JFT4;A0A0G2JG35;A0A140T8T5;A0A0G2JDN7;E9PZ43;A0A0G2JE57;A0A0G2JDU1;A0A0G2JFH2	2;2;2;2;2;2;2;2;1;1;1	2;2;2;2;2;2;2;2;1;1;1	2;2;2;2;2;2;2;2;1;1;1	Microtubule-associated protein 4;Microtubule-associated protein	Map4	sp|P27546|MAP4_MOUSE Microtubule-associated protein 4 OS=Mus musculus OX=10090 GN=Map4 PE=1 SV=3;tr|A0A0G2JFK3|A0A0G2JFK3_MOUSE Microtubule-associated protein (Fragment) OS=Mus musculus OX=10090 GN=Map4 PE=1 SV=1;tr|A0A0G2JDY5|A0A0G2JDY5_MOUSE Microtubule-	11	2	2	2	0	0	0	1	0	0	1	1	1	1	0	0	0	1	0	0	1	1	1	1	0	0	0	1	0	0	1	1	1	1	2.5	2.5	2.5	117.43	1125	1125;207;220;276;290;414;902;933;81;116;1441	1.2	4
A0A0G2JE99;P01843	A0A0G2JE99;P01843	2;2	2;2	2;2	Ig lambda-1 chain C region		tr|A0A0G2JE99|A0A0G2JE99_MOUSE Immunoglobulin lambda constant 1 (Fragment) OS=Mus musculus OX=10090 GN=Iglc1 PE=4 SV=1;sp|P01843|LAC1_MOUSE Ig lambda-1 chain C region OS=Mus musculus OX=10090 PE=1 SV=1	2	2	2	2	1	2	0	2	2	0	1	2	1	1	1	2	0	2	2	0	1	2	1	1	1	2	0	2	2	0	1	2	1	1	32.1	32.1	32.1	11.575	106	106;105	5
Q7TQF7;A0A668KM31;A0A0G2JEG8	Q7TQF7;A0A668KM31;A0A0G2JEG8	2;2;2	2;2;2	2;2;2	Amphiphysin	Amph	sp|Q7TQF7|AMPH_MOUSE Amphiphysin OS=Mus musculus OX=10090 GN=Amph PE=1 SV=1;tr|A0A668KM31|A0A668KM31_MOUSE Amphiphysin OS=Mus musculus OX=10090 GN=Amph PE=1 SV=1;tr|A0A0G2JEG8|A0A0G2JEG8_MOUSE Amphiphysin OS=Mus musculus OX=10090 GN=Amph PE=1 SV=1	3	2	2	2	0	1	0	0	0	0	1	2	0	1	0	1	0	0	0	0	1	2	0	1	0	1	0	0	0	0	1	2	0	1	3.6	3.6	3.6	75.012	686	686;820;690	1.88	3
P53612;Q6PFA1;Q9JIF6;A0A0G2JF29;A0A0G2JG79;Q3TVF4	P53612;Q6PFA1;Q9JIF6;A0A0G2JF29;A0A0G2JG79;Q3TVF4	1;1;1;1;1;1	1;1;1;1;1;1	1;1;1;1;1;1	Geranylgeranyl transferase type-2 subunit beta	Rabggtb	sp|P53612|PGTB2_MOUSE Geranylgeranyl transferase type-2 subunit beta OS=Mus musculus OX=10090 GN=Rabggtb PE=1 SV=2;tr|Q6PFA1|Q6PFA1_MOUSE Geranylgeranyl transferase type-2 subunit beta OS=Mus musculus OX=10090 GN=Rabggtb PE=1 SV=1;tr|Q9JIF6|Q9JIF6_MOUSE Ge	6	1	1	1	0	0	0	0	0	0	0	0	1	0	0	0	0	0	0	0	0	0	1	0	0	0	0	0	0	0	0	0	1	0	2.9	2.9	2.9	37.803	339	339;132;153;162;205;331	2
P62141;P63087;A0A0G2JFF1;P62137;A0A0G2JGC1;A0A0J9YUU8	P62141;P63087;A0A0G2JFF1;P62137;A0A0G2JGC1;A0A0J9YUU8	4;4;4;3;3;2	4;4;4;3;3;2	4;4;4;3;3;2	Serine/threonine-protein phosphatase PP1-beta catalytic subunit;Serine/threonine-protein phosphatase PP1-gamma catalytic subunit;Serine/threonine-protein phosphatase PP1-alpha catalytic subunit	Ppp1cb;Ppp1cc;Ppp1ca	sp|P62141|PP1B_MOUSE Serine/threonine-protein phosphatase PP1-beta catalytic subunit OS=Mus musculus OX=10090 GN=Ppp1cb PE=1 SV=3;sp|P63087|PP1G_MOUSE Serine/threonine-protein phosphatase PP1-gamma catalytic subunit OS=Mus musculus OX=10090 GN=Ppp1cc PE=1	6	4	4	4	0	0	1	3	0	0	0	1	0	0	0	0	1	3	0	0	0	1	0	0	0	0	1	3	0	0	0	1	0	0	15.3	15.3	15.3	37.186	327	327;323;292;330;273;100	4
Q9JIA1;A0A0G2JGB7;A0A0G2JGE8;A0A0G2JFT0	Q9JIA1;A0A0G2JGB7;A0A0G2JGE8	6;6;5;1	6;6;5;1	6;6;5;1	Leucine-rich glioma-inactivated protein 1	Lgi1	sp|Q9JIA1|LGI1_MOUSE Leucine-rich glioma-inactivated protein 1 OS=Mus musculus OX=10090 GN=Lgi1 PE=1 SV=1;tr|A0A0G2JGB7|A0A0G2JGB7_MOUSE Leucine-rich glioma-inactivated protein 1 OS=Mus musculus OX=10090 GN=Lgi1 PE=1 SV=1;tr|A0A0G2JGE8|A0A0G2JGE8_MOUSE Leu	4	6	6	6	1	1	0	0	0	0	5	4	3	5	1	1	0	0	0	0	5	4	3	5	1	1	0	0	0	0	5	4	3	5	12.7	12.7	12.7	63.643	557	557;533;509;291	3
Q0VGT4;A0A0G2JGJ2	Q0VGT4;A0A0G2JGJ2	1;1	1;1	1;1	Protein ZGRF1	Zgrf1	sp|Q0VGT4|ZGRF1_MOUSE Protein ZGRF1 OS=Mus musculus OX=10090 GN=Zgrf1 PE=1 SV=2;tr|A0A0G2JGJ2|A0A0G2JGJ2_MOUSE Protein ZGRF1 OS=Mus musculus OX=10090 GN=Zgrf1 PE=1 SV=1	2	1	1	1	0	0	1	0	0	1	0	0	1	0	0	0	1	0	0	1	0	0	1	0	0	0	1	0	0	1	0	0	1	0	0.9	0.9	0.9	205.73	1863	1863;785	2.73	2
Q61411;P08556;A0A0G2JGP4;Q9D091	Q61411;P08556;A0A0G2JGP4;Q9D091	1;1;1;1	1;1;1;1	1;1;1;1	GTPase HRas;GTPase HRas, N-terminally processed;GTPase NRas	Hras;Nras	sp|Q61411|RASH_MOUSE GTPase HRas OS=Mus musculus OX=10090 GN=Hras PE=1 SV=2;sp|P08556|RASN_MOUSE GTPase NRas OS=Mus musculus OX=10090 GN=Nras PE=1 SV=1;tr|A0A0G2JGP4|A0A0G2JGP4_MOUSE GTPase NRas (Fragment) OS=Mus musculus OX=10090 GN=Nras PE=1 SV=1;tr|Q9D0	4	1	1	1	0	0	0	0	0	0	1	1	1	0	0	0	0	0	0	0	1	1	1	0	0	0	0	0	0	0	1	1	1	0	6.3	6.3	6.3	21.298	189	189;189;183;189	5
Q6PIC6;A0A0G2JGX4;Q8VCE0;Q9WV27;Q9Z1W8;Q64436;Q91WH7;E9QNX7	Q6PIC6;A0A0G2JGX4;Q8VCE0	33;33;32;7;4;3;3;3	33;33;32;7;4;3;3;3	20;20;19;0;0;0;0;0	Sodium/potassium-transporting ATPase subunit alpha-3	Atp1a3	sp|Q6PIC6|AT1A3_MOUSE Sodium/potassium-transporting ATPase subunit alpha-3 OS=Mus musculus OX=10090 GN=Atp1a3 PE=1 SV=1;tr|A0A0G2JGX4|A0A0G2JGX4_MOUSE Sodium/potassium-transporting ATPase subunit alpha OS=Mus musculus OX=10090 GN=Atp1a3 PE=1 SV=1;tr|Q8VCE0	8	33	33	20	8	12	27	18	17	16	23	28	21	26	8	12	27	18	17	16	23	28	21	26	2	5	15	8	7	7	12	15	10	14	37.8	37.8	21.8	111.69	1013	1013;1026;1053;1032;1035;1033;1025;1034	1.61	184
Q7TME0;A0A0G2JGY9	Q7TME0;A0A0G2JGY9	7;7	7;7	7;7	Lipid phosphate phosphatase-related protein type 4	Lppr4	sp|Q7TME0|PLPR4_MOUSE 2-lysophosphatidate phosphatase PLPPR4 OS=Mus musculus OX=10090 GN=Plppr4 PE=1 SV=2;tr|A0A0G2JGY9|A0A0G2JGY9_MOUSE 2-lysophosphatidate phosphatase PLPPR4 (Fragment) OS=Mus musculus OX=10090 GN=Plppr4 PE=1 SV=1	2	7	7	7	0	0	1	1	0	0	5	2	3	4	0	0	1	1	0	0	5	2	3	4	0	0	1	1	0	0	5	2	3	4	12.4	12.4	12.4	83.289	766	766;707	2.06
A0A0J9YUN4;A0A0J9YUE9;F6W8Z8;D6RH60;F6RRH9;F6TH70	A0A0J9YUN4;A0A0J9YUE9	46;45;7;3;2;1	46;45;7;3;2;1	3;2;0;0;0;0			tr|A0A0J9YUN4|A0A0J9YUN4_MOUSE Dynamin GTPase OS=Mus musculus OX=10090 GN=Dnm1 PE=1 SV=1;tr|A0A0J9YUE9|A0A0J9YUE9_MOUSE Dynamin GTPase OS=Mus musculus OX=10090 GN=Dnm1 PE=1 SV=1	6	46	46	3	6	4	4	44	3	1	11	19	13	14	6	4	4	44	3	1	11	19	13	14	0	0	1	3	0	0	0	1	2	2	58.7	58.7	5.4	97.294	864	864;835;283;59;159;149	2.04	47
P17183;A0A0N4SUX5;D3Z6E4	P17183;A0A0N4SUX5;D3Z6E4	3;3;2	3;3;2	2;2;1	Gamma-enolase;Enolase	Eno2	sp|P17183|ENOG_MOUSE Gamma-enolase OS=Mus musculus OX=10090 GN=Eno2 PE=1 SV=2;tr|A0A0N4SUX5|A0A0N4SUX5_MOUSE 2-phospho-D-glycerate hydro-lyase OS=Mus musculus OX=10090 GN=Eno2 PE=1 SV=1;tr|D3Z6E4|D3Z6E4_MOUSE 2-phospho-D-glycerate hydro-lyase OS=Mus muscul	3	3	3	2	1	0	0	0	0	0	0	3	0	1	1	0	0	0	0	0	0	3	0	1	0	0	0	0	0	0	0	2	0	1	10.1	10.1	6	47.296	434	434;391;315	3
P31648;A0A0N4SVF5	P31648;A0A0N4SVF5	1;1	1;1	1;1	Sodium- and chloride-dependent GABA transporter 1	Slc6a1	sp|P31648|SC6A1_MOUSE Sodium- and chloride-dependent GABA transporter 1 OS=Mus musculus OX=10090 GN=Slc6a1 PE=1 SV=2;tr|A0A0N4SVF5|A0A0N4SVF5_MOUSE Sodium- and chloride-dependent GABA transporter 1 OS=Mus musculus OX=10090 GN=Slc6a1 PE=1 SV=1	2	1	1	1	0	0	0	0	0	0	0	1	0	0	0	0	0	0	0	0	0	1	0	0	0	0	0	0	0	0	0	1	0	0	2	2	2	67.001	599	599;415	2
Q62425;A0A0N4SVQ1	Q62425;A0A0N4SVQ1	2;2	2;2	2;2	Cytochrome c oxidase subunit NDUFA4	Ndufa4	sp|Q62425|NDUA4_MOUSE Cytochrome c oxidase subunit NDUFA4 OS=Mus musculus OX=10090 GN=Ndufa4 PE=1 SV=2;tr|A0A0N4SVQ1|A0A0N4SVQ1_MOUSE Cytochrome c oxidase subunit NDUFA4 OS=Mus musculus OX=10090 GN=Ndufa4 PE=1 SV=1	2	2	2	2	1	0	0	1	1	0	2	2	1	1	1	0	0	1	1	0	2	2	1	1	1	0	0	1	1	0	2	2	1	1	26.8	26.8	26.8	9.3267	82	82;49	5
P50518;A0A0N4SW34;A0A0N4SW07	P50518;A0A0N4SW34;A0A0N4SW07	1;1;1	1;1;1	1;1;1	V-type proton ATPase subunit E 1	Atp6v1e1	sp|P50518|VATE1_MOUSE V-type proton ATPase subunit E 1 OS=Mus musculus OX=10090 GN=Atp6v1e1 PE=1 SV=2;tr|A0A0N4SW34|A0A0N4SW34_MOUSE V-type proton ATPase subunit E 1 (Fragment) OS=Mus musculus OX=10090 GN=Atp6v1e1 PE=1 SV=1;tr|A0A0N4SW07|A0A0N4SW07_MOUSE V	3	1	1	1	0	1	0	0	0	0	1	1	0	1	0	1	0	0	0	0	1	1	0	1	0	1	0	0	0	0	1	1	0	1	6.2	6.2	6.2	26.157	226	226;87;128	5
Q9DC69;A0A0R3P9C8	Q9DC69;A0A0R3P9C8	2;2	2;2	2;2	NADH dehydrogenase [ubiquinone] 1 alpha subcomplex subunit 9, mitochondrial	Ndufa9	sp|Q9DC69|NDUA9_MOUSE NADH dehydrogenase [ubiquinone] 1 alpha subcomplex subunit 9, mitochondrial OS=Mus musculus OX=10090 GN=Ndufa9 PE=1 SV=2;tr|A0A0R3P9C8|A0A0R3P9C8_MOUSE NADH dehydrogenase [ubiquinone] 1 alpha subcomplex subunit 9, mitochondrial OS=Mus	2	2	2	2	0	0	0	0	0	0	0	2	0	1	0	0	0	0	0	0	0	2	0	1	0	0	0	0	0	0	0	2	0	1	5.8	5.8	5.8	42.525	377	377;373	4
Q922Q9;A0A0R4J058;A0A0R4J242;A0A1B0GSH5;D3YWG2;G8JL55	Q922Q9;A0A0R4J058;A0A0R4J242;A0A1B0GSH5;D3YWG2;G8JL55	3;3;3;2;2;2	3;3;3;2;2;2	3;3;3;2;2;2	Chitinase domain-containing protein 1	Chid1	sp|Q922Q9|CHID1_MOUSE Chitinase domain-containing protein 1 OS=Mus musculus OX=10090 GN=Chid1 PE=1 SV=1;tr|A0A0R4J058|A0A0R4J058_MOUSE Chitinase domain-containing protein 1 OS=Mus musculus OX=10090 GN=Chid1 PE=1 SV=1;tr|A0A0R4J242|A0A0R4J242_MOUSE Chitinas	6	3	3	3	0	2	0	0	0	0	1	3	1	2	0	2	0	0	0	0	1	3	1	2	0	2	0	0	0	0	1	3	1	2	8.9	8.9	8.9	44.905	393	393;310;396;192;263;297	4
A0A0R4J081;A2AQ17;Q9CWX2	A0A0R4J081;A2AQ17;Q9CWX2	2;2;2	2;2;2	2;2;2	Complex I intermediate-associated protein 30, mitochondrial	Ndufaf1	tr|A0A0R4J081|A0A0R4J081_MOUSE Complex I intermediate-associated protein 30, mitochondrial OS=Mus musculus OX=10090 GN=Ndufaf1 PE=1 SV=1;tr|A2AQ17|A2AQ17_MOUSE Complex I intermediate-associated protein 30, mitochondrial OS=Mus musculus OX=10090 GN=Ndufaf1	3	2	2	2	1	0	0	0	0	0	0	0	2	0	1	0	0	0	0	0	0	0	2	0	1	0	0	0	0	0	0	0	2	0	7.6	7.6	7.6	37.985	330	330;328;328	4
Q6NXH8;A0A0R4J0G2	Q6NXH8;A0A0R4J0G2	1;1	1;1	1;1	Methyltransferase-like protein 25	Mettl25	sp|Q6NXH8|MET25_MOUSE Methyltransferase-like protein 25 OS=Mus musculus OX=10090 GN=Mettl25 PE=2 SV=1;tr|A0A0R4J0G2|A0A0R4J0G2_MOUSE Methyltransferase-like protein 25 OS=Mus musculus OX=10090 GN=Mettl25 PE=1 SV=1	2	1	1	1	0	0	1	0	0	0	0	0	0	0	0	0	1	0	0	0	0	0	0	0	0	0	1	0	0	0	0	0	0	0	1.8	1.8	1.8	66.735	597	597;600	1	1
Q1RLL3;A0A0R4J0J1;Q8JZW4;Q8BT60;Q8BLR2;P59108;Q0VE82;Q9DC53;S4R2U2;Q9D6C8;A0A0R4J1D0	Q1RLL3;A0A0R4J0J1;Q8JZW4;Q8BT60;Q8BLR2;P59108;Q0VE82;Q9DC53;S4R2U2;Q9D6C8;A0A0R4J1D0	2;2;1;1;1;1;1;1;1;1;1	1;1;0;0;0;0;0;0;1;0;0	1;1;0;0;0;0;0;0;1;0;0	Copine-9;Copine-5;Copine-3;Copine-4;Copine-2;Copine-7;Copine-8	Cpne9;Cpne5;Cpne3;Cpne4;Cpne2;Cpne7;Cpne8	sp|Q1RLL3|CPNE9_MOUSE Copine-9 OS=Mus musculus OX=10090 GN=Cpne9 PE=1 SV=1;tr|A0A0R4J0J1|A0A0R4J0J1_MOUSE Copine-9 OS=Mus musculus OX=10090 GN=Cpne9 PE=1 SV=1;sp|Q8JZW4|CPNE5_MOUSE Copine-5 OS=Mus musculus OX=10090 GN=Cpne5 PE=1 SV=1;sp|Q8BT60|CPNE3_MOUSE	11	2	1	1	1	0	1	2	1	0	1	1	1	1	0	0	0	1	0	0	0	0	0	0	0	0	0	1	0	0	0	0	0	0	4.3	2.7	2.7	61.851	553	553;553;593;533;557;548;557;577;46;475;547	5
P13808;A0A0R4J1K4;A0A0R4J1K9;A0A0R4J101	P13808;A0A0R4J1K4;A0A0R4J1K9;A0A0R4J101	2;2;2;2	2;2;2;2	2;2;2;2	Anion exchange protein 2	Slc4a2	sp|P13808|B3A2_MOUSE Anion exchange protein 2 OS=Mus musculus OX=10090 GN=Slc4a2 PE=1 SV=1;tr|A0A0R4J1K4|A0A0R4J1K4_MOUSE Anion exchange protein OS=Mus musculus OX=10090 GN=Slc4a2 PE=1 SV=1;tr|A0A0R4J1K9|A0A0R4J1K9_MOUSE Anion exchange protein OS=Mus muscu	4	2	2	2	0	0	0	2	0	0	0	0	0	0	0	0	0	2	0	0	0	0	0	0	0	0	0	2	0	0	0	0	0	0	2	2	2	136.81	1237	1237;1223;1228;1237	1	2
Q9QZH6;A0A0R4J174;J3KMM6	Q9QZH6;A0A0R4J174;J3KMM6	2;2;1	2;2;1	2;2;1	Evolutionarily conserved signaling intermediate in Toll pathway, mitochondrial	Ecsit	sp|Q9QZH6|ECSIT_MOUSE Evolutionarily conserved signaling intermediate in Toll pathway, mitochondrial OS=Mus musculus OX=10090 GN=Ecsit PE=1 SV=2;tr|A0A0R4J174|A0A0R4J174_MOUSE Evolutionarily conserved signaling intermediate in Toll pathway, mitochondrial O	3	2	2	2	1	1	0	0	0	0	0	0	2	1	1	1	0	0	0	0	0	0	2	1	1	1	0	0	0	0	0	0	2	1	6.4	6.4	6.4	49.798	435	435;435;223	3
A0A0R4J1U6	A0A0R4J1U6	1	1	1			tr|A0A0R4J1U6|A0A0R4J1U6_MOUSE IQ motif and SEC7 domain-containing protein 1 (Fragment) OS=Mus musculus OX=10090 GN=Iqsec1 PE=1 SV=1	1	1	1	1	1	0	0	0	0	0	0	0	0	0	1	0	0	0	0	0	0	0	0	0	1	0	0	0	0	0	0	0	0	0	6.4	6.4	6.4	24.357	218	218	4
Q91ZT9;A0A0R4J1W1	Q91ZT9;A0A0R4J1W1	1;1	1;1	1;1	Ankyrin repeat and SOCS box protein 8	Asb8	sp|Q91ZT9|ASB8_MOUSE Ankyrin repeat and SOCS box protein 8 OS=Mus musculus OX=10090 GN=Asb8 PE=2 SV=1;tr|A0A0R4J1W1|A0A0R4J1W1_MOUSE Ankyrin repeat and SOCS box protein 8 OS=Mus musculus OX=10090 GN=Asb8 PE=1 SV=1	2	1	1	1	0	0	0	0	0	0	1	0	0	0	0	0	0	0	0	0	1	0	0	0	0	0	0	0	0	0	1	0	0	0	2.4	2.4	2.4	31.735	288	288;288	1	1
Q6WVG3;A0A0R4J2B2;Q5DTY9;Q50H33;Q8C7J6	Q6WVG3;A0A0R4J2B2	11;11;1;1;1	11;11;1;1;1	11;11;1;1;1	BTB/POZ domain-containing protein KCTD12	Kctd12	sp|Q6WVG3|KCD12_MOUSE BTB/POZ domain-containing protein KCTD12 OS=Mus musculus OX=10090 GN=Kctd12 PE=1 SV=1;tr|A0A0R4J2B2|A0A0R4J2B2_MOUSE BTB/POZ domain-containing protein KCTD12 OS=Mus musculus OX=10090 GN=Kctd12 PE=1 SV=1	5	11	11	11	0	0	10	10	0	0	4	3	1	4	0	0	10	10	0	0	4	3	1	4	0	0	10	10	0	0	4	3	1	4	38.5	38.5	38.5	35.892	327	327;327;427;476;292	4
P19096;A0A0U1RNJ1	P19096;A0A0U1RNJ1	4;4	4;4	4;4	Fatty acid synthase;[Acyl-carrier-protein] S-acetyltransferase;[Acyl-carrier-protein] S-malonyltransferase;3-oxoacyl-[acyl-carrier-protein] synthase;3-oxoacyl-[acyl-carrier-protein] reductase;3-hydroxyacyl-[acyl-carrier-protein] dehydratase;Enoyl-[acyl-carrier-protein] reductase;Oleoyl-[acyl-carrier-protein] hydrolase	Fasn	sp|P19096|FAS_MOUSE Fatty acid synthase OS=Mus musculus OX=10090 GN=Fasn PE=1 SV=2;tr|A0A0U1RNJ1|A0A0U1RNJ1_MOUSE 3-hydroxyacyl-[acyl-carrier-protein] dehydratase OS=Mus musculus OX=10090 GN=Fasn PE=1 SV=1	2	4	4	4	0	1	1	0	0	0	1	2	0	3	0	1	1	0	0	0	1	2	0	3	0	1	1	0	0	0	1	2	0	3	2	2	2	272.43	2504	2504;2502	1	8
Q8BMB0;A0A0U1RNN7;A0A0U1RPW3;A0A0U1RPK1	Q8BMB0;A0A0U1RNN7;A0A0U1RPW3;A0A0U1RPK1	1;1;1;1	1;1;1;1	1;1;1;1	Protein EMSY	Emsy	sp|Q8BMB0|EMSY_MOUSE BRCA2-interacting transcriptional repressor EMSY OS=Mus musculus OX=10090 GN=Emsy PE=1 SV=2;tr|A0A0U1RNN7|A0A0U1RNN7_MOUSE BRCA2-interacting transcriptional repressor EMSY (Fragment) OS=Mus musculus OX=10090 GN=Emsy PE=1 SV=2;tr|A0A0U1	4	1	1	1	0	0	0	0	1	0	0	0	0	0	0	0	0	0	1	0	0	0	0	0	0	0	0	0	1	0	0	0	0	0	1.4	1.4	1.4	135.29	1264	1264;316;735;1070	2
P06745;A0A0U1RP97;A0A0U1RQ18	P06745;A0A0U1RP97;A0A0U1RQ18	1;1;1	1;1;1	1;1;1	Glucose-6-phosphate isomerase	Gpi	sp|P06745|G6PI_MOUSE Glucose-6-phosphate isomerase OS=Mus musculus OX=10090 GN=Gpi PE=1 SV=4;tr|A0A0U1RP97|A0A0U1RP97_MOUSE Glucose-6-phosphate isomerase 1 (Fragment) OS=Mus musculus OX=10090 GN=Gpi1 PE=1 SV=1;tr|A0A0U1RQ18|A0A0U1RQ18_MOUSE Glucose-6-phosp	3	1	1	1	0	0	0	0	0	0	0	1	0	0	0	0	0	0	0	0	0	1	0	0	0	0	0	0	0	0	0	1	0	0	2.7	2.7	2.7	62.766	558	558;152;191	3
Q9D3A9;A0A0U1RPU8	Q9D3A9;A0A0U1RPU8	1;1	1;1	1;1	Protein tweety homolog 1	Ttyh1	sp|Q9D3A9|TTYH1_MOUSE Protein tweety homolog 1 OS=Mus musculus OX=10090 GN=Ttyh1 PE=1 SV=1;tr|A0A0U1RPU8|A0A0U1RPU8_MOUSE Protein tweety homolog OS=Mus musculus OX=10090 GN=Ttyh1 PE=1 SV=1	2	1	1	1	0	0	0	0	0	0	0	1	0	0	0	0	0	0	0	0	0	1	0	0	0	0	0	0	0	0	0	1	0	0	2.9	2.9	2.9	49.032	450	450;354	3
Q8R0A6;A0A140LHB6;F6Y6A6	Q8R0A6;A0A140LHB6;F6Y6A6	1;1;1	1;1;1	1;1;1	V-set and transmembrane domain-containing protein 2A	Vstm2a	sp|Q8R0A6|VTM2A_MOUSE V-set and transmembrane domain-containing protein 2A OS=Mus musculus OX=10090 GN=Vstm2a PE=1 SV=2;tr|A0A140LHB6|A0A140LHB6_MOUSE V-set and transmembrane domain-containing protein 2A (Fragment) OS=Mus musculus OX=10090 GN=Vstm2a PE=1 S	3	1	1	1	1	1	0	1	1	0	1	1	1	1	1	1	0	1	1	0	1	1	1	1	1	1	0	1	1	0	1	1	1	1	6.4	6.4	6.4	25.876	236	236;234;282	3.2	5
Q8VDQ8;A0A140LHL5	Q8VDQ8;A0A140LHL5	3;3	3;3	3;3	NAD-dependent protein deacetylase sirtuin-2	Sirt2	sp|Q8VDQ8|SIR2_MOUSE NAD-dependent protein deacetylase sirtuin-2 OS=Mus musculus OX=10090 GN=Sirt2 PE=1 SV=2;tr|A0A140LHL5|A0A140LHL5_MOUSE NAD-dependent protein deacetylase OS=Mus musculus OX=10090 GN=Sirt2 PE=1 SV=1	2	3	3	3	0	2	0	0	0	0	2	3	0	2	0	2	0	0	0	0	2	3	0	2	0	2	0	0	0	0	2	3	0	2	9.5	9.5	9.5	43.256	389	389;351	4
A0A140LIQ3	A0A140LIQ3	1	1	1			tr|A0A140LIQ3|A0A140LIQ3_MOUSE Olfactory receptor 209 OS=Mus musculus OX=10090 GN=Olfr209 PE=4 SV=1	1	1	1	1	0	0	0	1	0	0	0	0	0	0	0	0	0	1	0	0	0	0	0	0	0	0	0	1	0	0	0	0	0	0	11.7	11.7	11.7	11.718	103	103	1.5	1
Q5DU14;A0A1L1SRA7;A0A140LJ46;F8WGF8	Q5DU14;A0A1L1SRA7;A0A140LJ46;F8WGF8	1;1;1;1	1;1;1;1	1;1;1;1	Unconventional myosin-XVI	Myo16	sp|Q5DU14|MYO16_MOUSE Unconventional myosin-XVI OS=Mus musculus OX=10090 GN=Myo16 PE=1 SV=2;tr|A0A1L1SRA7|A0A1L1SRA7_MOUSE Unconventional myosin-XVI (Fragment) OS=Mus musculus OX=10090 GN=Myo16 PE=1 SV=1;tr|A0A140LJ46|A0A140LJ46_MOUSE Unconventional myosin	4	1	1	1	0	0	0	0	0	0	1	1	0	0	0	0	0	0	0	0	1	1	0	0	0	0	0	0	0	0	1	1	0	0	0.4	0.4	0.4	211.38	1919	1919;240;629;1877	1.5	2
A0A140T8M1;P01646;P01645;P01644;P04946;P01648;P01647	A0A140T8M1;P01646;P01645;P01644;P04946;P01648;P01647	2;2;2;2;1;1;1	2;2;2;2;1;1;1	2;2;2;2;1;1;1	Ig kappa chain V-V region HP 123E6;Ig kappa chain V-V region HP 93G7;Ig kappa chain V-V region HP R16.7;Ig kappa chain V-V region NQ5-89.4;Ig kappa chain V-V region HP 91A3;Ig kappa chain V-V region HP 124E1		tr|A0A140T8M1|A0A140T8M1_MOUSE Immunoglobulin kappa variable 10-96 (Fragment) OS=Mus musculus OX=10090 GN=Igkv10-96 PE=4 SV=2;sp|P01646|KV5AD_MOUSE Ig kappa chain V-V region HP 123E6 OS=Mus musculus OX=10090 PE=1 SV=1;sp|P01645|KV5AC_MOUSE Ig kappa chain V	7	2	2	2	1	2	0	0	0	0	1	2	0	1	1	2	0	0	0	0	1	2	0	1	1	2	0	0	0	0	1	2	0	1	25.2	25.2	25.2	12.681	115	115;108;108;108;108;108;108	5
A0A140T8M2;P01636	A0A140T8M2;P01636	2;1	1;1	1;1	Ig kappa chain V-V region MOPC 149		tr|A0A140T8M2|A0A140T8M2_MOUSE Immunoglobulin kappa variable 12-44 (Fragment) OS=Mus musculus OX=10090 GN=Igkv12-44 PE=4 SV=2;sp|P01636|KV5A4_MOUSE Ig kappa chain V-V region MOPC 149 OS=Mus musculus OX=10090 PE=1 SV=1	2	2	1	1	2	2	2	1	2	2	1	2	2	2	1	1	1	1	1	1	0	1	1	1	1	1	1	1	1	1	0	1	1	1	20	11.3	11.3	12.557	115	115;108	4.89
A0A140T8M5	A0A140T8M5	2	2	2			tr|A0A140T8M5|A0A140T8M5_MOUSE Immunoglobulin kappa variable 6-15 (Fragment) OS=Mus musculus OX=10090 GN=Igkv6-15 PE=1 SV=2	1	2	2	2	0	2	0	0	0	0	1	1	1	1	0	2	0	0	0	0	1	1	1	1	0	2	0	0	0	0	1	1	1	1	26.1	26.1	26.1	12.757	115	115	5
A0A140T8N0;P01639	A0A140T8N0;P01639	1;1	1;1	1;1	Ig kappa chain V-V region MOPC 41	Gm5571	tr|A0A140T8N0|A0A140T8N0_MOUSE Immunoglobulin kappa chain variable 9-120 (Fragment) OS=Mus musculus OX=10090 GN=Igkv9-120 PE=1 SV=2;sp|P01639|KV5A7_MOUSE Ig kappa chain V-V region MOPC 41 OS=Mus musculus OX=10090 GN=Gm5571 PE=1 SV=1	2	1	1	1	0	1	0	0	0	0	1	1	0	0	0	1	0	0	0	0	1	1	0	0	0	1	0	0	0	0	1	1	0	0	12	12	12	12.805	117	117;130	5
A0A140T8N3;A0A075B666	A0A140T8N3	3;1	3;1	3;1			tr|A0A140T8N3|A0A140T8N3_MOUSE Immunoglobulin kappa chain variable 13-84 (Fragment) OS=Mus musculus OX=10090 GN=Igkv13-84 PE=4 SV=2	2	3	3	3	1	0	1	1	2	1	3	0	1	1	1	0	1	1	2	1	3	0	1	1	1	0	1	1	2	1	3	0	1	1	25.2	25.2	25.2	12.617	115	115;115	4.46	1
A0A140T8N5	A0A140T8N5	2	1	1			tr|A0A140T8N5|A0A140T8N5_MOUSE Immunoglobulin kappa variable 6-23 (Fragment) OS=Mus musculus OX=10090 GN=Igkv6-23 PE=4 SV=2	1	2	1	1	1	2	1	2	2	1	2	1	1	1	0	1	0	1	1	0	1	0	0	0	0	1	0	1	1	0	1	0	0	0	26.1	18.3	18.3	12.787	115	115	5
A0A140T8N8	A0A140T8N8	1	1	1			tr|A0A140T8N8|A0A140T8N8_MOUSE Immunoglobulin kappa variable 9-123 (Fragment) OS=Mus musculus OX=10090 GN=Igkv9-123 PE=4 SV=2	1	1	1	1	0	0	0	0	0	0	0	0	1	1	0	0	0	0	0	0	0	0	1	1	0	0	0	0	0	0	0	0	1	1	13.7	13.7	13.7	12.815	117	117	3	2
A0A140T8N9	A0A140T8N9	3	3	3			tr|A0A140T8N9|A0A140T8N9_MOUSE Immunoglobulin kappa variable 6-32 (Fragment) OS=Mus musculus OX=10090 GN=Igkv6-32 PE=4 SV=2	1	3	3	3	2	3	2	1	1	2	2	3	1	2	2	3	2	1	1	2	2	3	1	2	2	3	2	1	1	2	2	3	1	2	33.9	33.9	33.9	12.656	115	115	5
A0A140T8P1	A0A140T8P1	1	1	1			tr|A0A140T8P1|A0A140T8P1_MOUSE Immunoglobulin kappa variable 6-14 (Fragment) OS=Mus musculus OX=10090 GN=Igkv6-14 PE=4 SV=2	1	1	1	1	0	1	0	0	0	0	0	0	0	1	0	1	0	0	0	0	0	0	0	1	0	1	0	0	0	0	0	0	0	1	7.8	7.8	7.8	12.848	115	115	5
A0A140T8P6	A0A140T8P6	3	3	2			tr|A0A140T8P6|A0A140T8P6_MOUSE Immunoglobulin kappa variable 12-46 (Fragment) OS=Mus musculus OX=10090 GN=Igkv12-46 PE=1 SV=2	1	3	3	2	1	2	2	2	2	0	1	0	2	2	1	2	2	2	2	0	1	0	2	2	1	1	1	1	1	0	0	0	1	1	40.9	40.9	29.6	12.562	115	115	5
A0A140T8P9;P01638;A0A075B5K0;P01637	A0A140T8P9;P01638;A0A075B5K0;P01637	2;2;1;1	2;2;1;1	2;2;1;1	Ig kappa chain V-V region L6;Ig kappa chain V-V region T1	Igkv14-126	tr|A0A140T8P9|A0A140T8P9_MOUSE Immunoglobulin kappa variable 14-111 (Fragment) OS=Mus musculus OX=10090 GN=Igkv14-111 PE=4 SV=2;sp|P01638|KV5A6_MOUSE Ig kappa chain V-V region L6 (Fragment) OS=Mus musculus OX=10090 PE=4 SV=1;tr|A0A075B5K0|A0A075B5K0_MOUSE	4	2	2	2	0	2	0	0	0	0	1	1	0	2	0	2	0	0	0	0	1	1	0	2	0	2	0	0	0	0	1	1	0	2	28.2	28.2	28.2	13.232	117	117;115;117;128	5
A0A140T8Q3;P01633	A0A140T8Q3;P01633	2;1	2;1	1;1	Ig kappa chain V19-17	Igk-V19-17	tr|A0A140T8Q3|A0A140T8Q3_MOUSE Immunoglobulin kappa variable 6-17 (Fragment) OS=Mus musculus OX=10090 GN=Igkv6-17 PE=1 SV=2;sp|P01633|KV5A1_MOUSE Ig kappa chain V19-17 OS=Mus musculus OX=10090 GN=Igk-V19-17 PE=1 SV=1	2	2	2	1	1	2	1	0	0	1	1	2	1	1	1	2	1	0	0	1	1	2	1	1	1	1	1	0	0	1	1	1	1	1	26.1	26.1	7.8	12.76	115	115;149	5
G3X9R0;A0A1B0GR13	G3X9R0;A0A1B0GR13	1;1	1;1	1;1		Cylc1	tr|G3X9R0|G3X9R0_MOUSE Cylicin, basic protein of sperm head cytoskeleton 1 OS=Mus musculus OX=10090 GN=Cylc1 PE=1 SV=1;tr|A0A1B0GR13|A0A1B0GR13_MOUSE Cylicin, basic protein of sperm head cytoskeleton 1 OS=Mus musculus OX=10090 GN=Cylc1 PE=1 SV=1	2	1	1	1	0	0	1	0	0	0	0	0	0	0	0	0	1	0	0	0	0	0	0	0	0	0	1	0	0	0	0	0	0	0	1.6	1.6	1.6	71.47	640	640;642	1	1
P70302;A0A1B0GR78;A0A1B0GRA5;A0A1B0GQZ3	P70302;A0A1B0GR78;A0A1B0GRA5	8;8;8;2	8;8;8;2	8;8;8;2	Stromal interaction molecule 1	Stim1	sp|P70302|STIM1_MOUSE Stromal interaction molecule 1 OS=Mus musculus OX=10090 GN=Stim1 PE=1 SV=2;tr|A0A1B0GR78|A0A1B0GR78_MOUSE Stromal interaction molecule 1 OS=Mus musculus OX=10090 GN=Stim1 PE=1 SV=1;tr|A0A1B0GRA5|A0A1B0GRA5_MOUSE Stromal interaction mo	4	8	8	8	0	0	2	7	0	0	0	0	0	0	0	0	2	7	0	0	0	0	0	0	0	0	2	7	0	0	0	0	0	0	12.4	12.4	12.4	77.566	685	685;540;793;207	1.83	2
Q3TXX4;A0A1B0GRU0	Q3TXX4;A0A1B0GRU0	1;1	1;1	1;1	Vesicular glutamate transporter 1	Slc17a7	sp|Q3TXX4|VGLU1_MOUSE Vesicular glutamate transporter 1 OS=Mus musculus OX=10090 GN=Slc17a7 PE=1 SV=2;tr|A0A1B0GRU0|A0A1B0GRU0_MOUSE Vesicular glutamate transporter 1 OS=Mus musculus OX=10090 GN=Slc17a7 PE=1 SV=1	2	1	1	1	0	0	0	0	0	0	1	1	0	0	0	0	0	0	0	0	1	1	0	0	0	0	0	0	0	0	1	1	0	0	2	2	2	61.637	560	560;585	2	2
Q80TQ2;A0A1B0GSE5;Z4YJJ5	Q80TQ2;A0A1B0GSE5;Z4YJJ5	1;1;1	1;1;1	1;1;1	Ubiquitin carboxyl-terminal hydrolase CYLD	Cyld	sp|Q80TQ2|CYLD_MOUSE Ubiquitin carboxyl-terminal hydrolase CYLD OS=Mus musculus OX=10090 GN=Cyld PE=1 SV=2;tr|A0A1B0GSE5|A0A1B0GSE5_MOUSE Deubiquitinating enzyme CYLD OS=Mus musculus OX=10090 GN=Cyld PE=1 SV=1;tr|Z4YJJ5|Z4YJJ5_MOUSE Deubiquitinating enzyme	3	1	1	1	0	0	0	1	0	0	0	0	0	0	0	0	0	1	0	0	0	0	0	0	0	0	0	1	0	0	0	0	0	0	1.1	1.1	1.1	106.58	952	952;770;955	1	1
G3XA11;Q9D6E1;A0A1B0GSP1;Q6ZWS4	G3XA11;Q9D6E1;A0A1B0GSP1;Q6ZWS4	1;1;1;1	1;1;1;1	1;1;1;1	Protein cornichon homolog 3	Cnih3	tr|G3XA11|G3XA11_MOUSE Protein cornichon homolog 3 OS=Mus musculus OX=10090 GN=Cnih3 PE=1 SV=1;tr|Q9D6E1|Q9D6E1_MOUSE Protein cornichon homolog 3 OS=Mus musculus OX=10090 GN=Cnih3 PE=1 SV=1;tr|A0A1B0GSP1|A0A1B0GSP1_MOUSE Protein cornichon homolog 3 OS=Mus	4	1	1	1	0	0	1	0	0	0	1	1	1	0	0	0	1	0	0	0	1	1	1	0	0	0	1	0	0	0	1	1	1	0	10.7	10.7	10.7	13.234	112	112;179;187;160	5
P06151;A0A1B0GSR9;A0A1B0GSX0;A0A1B0GT41;A0A1B0GQX5;D3YZQ9;A0A1B0GRC1;A0A1B0GRS2;A0A1B0GRW9;A0A1B0GSL7;A0A1B0GS79;P00342;D3YVR7;D3YZE4	P06151;A0A1B0GSR9;A0A1B0GSX0;A0A1B0GT41;A0A1B0GQX5;D3YZQ9	5;5;4;3;3;3;2;2;2;2;2;1;1;1	4;4;3;2;2;2;2;2;2;2;2;0;0;0	4;4;3;2;2;2;2;2;2;2;2;0;0;0	L-lactate dehydrogenase A chain;L-lactate dehydrogenase	Ldha	sp|P06151|LDHA_MOUSE L-lactate dehydrogenase A chain OS=Mus musculus OX=10090 GN=Ldha PE=1 SV=3;tr|A0A1B0GSR9|A0A1B0GSR9_MOUSE L-lactate dehydrogenase OS=Mus musculus OX=10090 GN=Ldha PE=1 SV=1;tr|A0A1B0GSX0|A0A1B0GSX0_MOUSE L-lactate dehydrogenase OS=Mus	14	5	4	4	0	0	2	1	0	0	1	4	1	2	0	0	1	1	0	0	1	4	1	2	0	0	1	1	0	0	1	4	1	2	13.9	10.2	10.2	36.498	332	332;315;361;176;201;236;66;68;104;128;205;332;235;236	4.1
Q80UJ7;A0A1D5RLG3	Q80UJ7;A0A1D5RLG3	1;1	1;1	1;1	Rab3 GTPase-activating protein catalytic subunit	Rab3gap1	sp|Q80UJ7|RB3GP_MOUSE Rab3 GTPase-activating protein catalytic subunit OS=Mus musculus OX=10090 GN=Rab3gap1 PE=1 SV=4;tr|A0A1D5RLG3|A0A1D5RLG3_MOUSE Rab3 GTPase-activating protein catalytic subunit OS=Mus musculus OX=10090 GN=Rab3gap1 PE=1 SV=1	2	1	1	1	0	0	0	0	1	0	0	0	0	0	0	0	0	0	1	0	0	0	0	0	0	0	0	0	1	0	0	0	0	0	1.1	1.1	1.1	110.2	981	981;988	3.5
Q2PFD7;Q8C0E9;E9PUC5;F6Z9E6;A0A1D5RLK2;A0A1D5RMH7	Q2PFD7;Q8C0E9;E9PUC5;F6Z9E6;A0A1D5RLK2;A0A1D5RMH7	3;3;3;3;3;3	3;3;3;3;3;3	3;3;3;3;3;3	PH and SEC7 domain-containing protein 3	Psd3	sp|Q2PFD7|PSD3_MOUSE PH and SEC7 domain-containing protein 3 OS=Mus musculus OX=10090 GN=Psd3 PE=1 SV=2;tr|Q8C0E9|Q8C0E9_MOUSE PH and SEC7 domain-containing protein 3 OS=Mus musculus OX=10090 GN=Psd3 PE=1 SV=1;tr|E9PUC5|E9PUC5_MOUSE PH and SEC7 domain-cont	6	3	3	3	1	0	0	0	0	0	1	1	2	3	1	0	0	0	0	0	1	1	2	3	1	0	0	0	0	0	1	1	2	3	4.1	4.1	4.1	114.72	1037	1037;390;376;1005;1035;1289	3.62
A0A1L1SV46;A0A1L1SQX6;Q8BM13	A0A1L1SV46;A0A1L1SQX6;Q8BM13	1;1;1	1;1;1	1;1;1	Noelin-2	Olfm2	tr|A0A1L1SV46|A0A1L1SV46_MOUSE Noelin-2 OS=Mus musculus OX=10090 GN=Olfm2 PE=1 SV=1;tr|A0A1L1SQX6|A0A1L1SQX6_MOUSE Noelin-2 OS=Mus musculus OX=10090 GN=Olfm2 PE=1 SV=1;sp|Q8BM13|NOE2_MOUSE Noelin-2 OS=Mus musculus OX=10090 GN=Olfm2 PE=1 SV=2	3	1	1	1	0	0	0	0	1	0	0	1	0	1	0	0	0	0	1	0	0	1	0	1	0	0	0	0	1	0	0	1	0	1	2.3	2.3	2.3	53.81	478	478;456;448	2.33
P61294;P35279;Q8BHD0;A0A1L1SRS6;D3YV69	P61294;P35279;Q8BHD0;A0A1L1SRS6;D3YV69	1;1;1;1;1	1;1;1;1;1	1;1;1;1;1	Ras-related protein Rab-6B;Ras-related protein Rab-6A;Ras-related protein Rab-39A	Rab6b;Rab6a;Rab39a	sp|P61294|RAB6B_MOUSE Ras-related protein Rab-6B OS=Mus musculus OX=10090 GN=Rab6b PE=1 SV=1;sp|P35279|RAB6A_MOUSE Ras-related protein Rab-6A OS=Mus musculus OX=10090 GN=Rab6a PE=1 SV=4;sp|Q8BHD0|RB39A_MOUSE Ras-related protein Rab-39A OS=Mus musculus OX=1	5	1	1	1	0	0	0	1	0	0	1	0	1	1	0	0	0	1	0	0	1	0	1	1	0	0	0	1	0	0	1	0	1	1	5.3	5.3	5.3	23.461	208	208;208;217;80;175	5
A0A1L1STC5	A0A1L1STC5	1	1	1			tr|A0A1L1STC5|A0A1L1STC5_MOUSE Guanine nucleotide-binding protein subunit beta-5 OS=Mus musculus OX=10090 GN=Gnb5 PE=1 SV=1	1	1	1	1	0	0	0	0	0	0	1	0	1	1	0	0	0	0	0	0	1	0	1	1	0	0	0	0	0	0	1	0	1	1	32.6	32.6	32.6	5.1306	46	46	4
Q9D6R2;A0A1L1STE6	Q9D6R2;A0A1L1STE6	4;4	4;4	4;4	Isocitrate dehydrogenase [NAD] subunit alpha, mitochondrial	Idh3a	sp|Q9D6R2|IDH3A_MOUSE Isocitrate dehydrogenase [NAD] subunit alpha, mitochondrial OS=Mus musculus OX=10090 GN=Idh3a PE=1 SV=1;tr|A0A1L1STE6|A0A1L1STE6_MOUSE Isocitrate dehydrogenase [NAD] subunit, mitochondrial OS=Mus musculus OX=10090 GN=Idh3a PE=1 SV=1	2	4	4	4	2	1	0	0	0	0	3	4	3	3	2	1	0	0	0	0	3	4	3	3	2	1	0	0	0	0	3	4	3	3	12	12	12	39.638	366	366;384	4
P01831;A0A1L1SUX8	P01831;A0A1L1SUX8	3;3	3;3	3;3	Thy-1 membrane glycoprotein	Thy1	sp|P01831|THY1_MOUSE Thy-1 membrane glycoprotein OS=Mus musculus OX=10090 GN=Thy1 PE=1 SV=1;tr|A0A1L1SUX8|A0A1L1SUX8_MOUSE Thy-1 antigen (Fragment) OS=Mus musculus OX=10090 GN=Thy1 PE=1 SV=1	2	3	3	3	0	3	0	0	0	0	1	3	1	2	0	3	0	0	0	0	1	3	1	2	0	3	0	0	0	0	1	3	1	2	22.8	22.8	22.8	18.08	162	162;125	5
P57780;Q7TPR4;A1BN54;E9Q2W9;A0A1L1SV25	P57780;Q7TPR4;A1BN54;E9Q2W9;A0A1L1SV25	1;1;1;1;1	1;1;1;1;1	1;1;1;1;1	Alpha-actinin-4;Alpha-actinin-1	Actn4;Actn1	sp|P57780|ACTN4_MOUSE Alpha-actinin-4 OS=Mus musculus OX=10090 GN=Actn4 PE=1 SV=1;sp|Q7TPR4|ACTN1_MOUSE Alpha-actinin-1 OS=Mus musculus OX=10090 GN=Actn1 PE=1 SV=1;tr|A1BN54|A1BN54_MOUSE Alpha actinin 1a OS=Mus musculus OX=10090 GN=Actn1 PE=1 SV=1;tr|E9Q2W	5	1	1	1	0	0	0	0	0	0	0	1	0	0	0	0	0	0	0	0	0	1	0	0	0	0	0	0	0	0	0	1	0	0	1.1	1.1	1.1	104.98	912	912;892;887;518;932	2
A0A1W2P772;A0A1W2P882	A0A1W2P772;A0A1W2P882	7;6	1;1	1;1			tr|A0A1W2P772|A0A1W2P772_MOUSE Plasma membrane calcium-transporting ATPase 1 (Fragment) OS=Mus musculus OX=10090 GN=Atp2b1 PE=1 SV=1;tr|A0A1W2P882|A0A1W2P882_MOUSE Plasma membrane calcium-transporting ATPase 1 (Fragment) OS=Mus musculus OX=10090 GN=Atp2b1	2	7	1	1	0	0	1	0	0	0	5	4	1	5	0	0	0	0	0	0	1	1	0	1	0	0	0	0	0	0	1	1	0	1	24.9	6.9	6.9	35.622	317	317;279	1	3
P62270;A0A3Q4EGP3;S4R1N6;F6YVP7;A0A1Y7VKY1	P62270;A0A3Q4EGP3;S4R1N6;F6YVP7;A0A1Y7VKY1	1;1;1;1;1	1;1;1;1;1	1;1;1;1;1	40S ribosomal protein S18	Rps18;Gm10260	sp|P62270|RS18_MOUSE 40S ribosomal protein S18 OS=Mus musculus OX=10090 GN=Rps18 PE=1 SV=3;tr|A0A3Q4EGP3|A0A3Q4EGP3_MOUSE 40S ribosomal protein S18 OS=Mus musculus OX=10090 GN=Rps18 PE=4 SV=1;tr|S4R1N6|S4R1N6_MOUSE 40S ribosomal protein S18 OS=Mus musculus	5	1	1	1	0	0	1	0	0	0	0	0	0	0	0	0	1	0	0	0	0	0	0	0	0	0	1	0	0	0	0	0	0	0	5.9	5.9	5.9	17.718	152	152;38;107;152;152	5
E9Q1L8;A0A1Y7VP64;M0QWP5	E9Q1L8;A0A1Y7VP64;M0QWP5	1;1;1	1;1;1	1;1;1		Zfp493	tr|E9Q1L8|E9Q1L8_MOUSE Zinc finger protein 493 OS=Mus musculus OX=10090 GN=Zfp493 PE=4 SV=1;tr|A0A1Y7VP64|A0A1Y7VP64_MOUSE Zinc finger protein 493 (Fragment) OS=Mus musculus OX=10090 GN=Zfp493 PE=4 SV=1;tr|M0QWP5|M0QWP5_MOUSE Zinc finger protein 493 OS=Mus	3	1	1	1	0	1	0	0	0	0	0	0	0	0	0	1	0	0	0	0	0	0	0	0	0	1	0	0	0	0	0	0	0	0	2.1	2.1	2.1	44.416	384	384;85;110	3
Q8CFI0;A0A286YCR1;A0A494BA39;A0A494B9F0;A0A494B953;A0A494BAG2;A0A494BAX0	Q8CFI0;A0A286YCR1;A0A494BA39;A0A494B9F0;A0A494B953;A0A494BAG2;A0A494BAX0	1;1;1;1;1;1;1	1;1;1;1;1;1;1	1;1;1;1;1;1;1	E3 ubiquitin-protein ligase NEDD4-like	Nedd4l	sp|Q8CFI0|NED4L_MOUSE E3 ubiquitin-protein ligase NEDD4-like OS=Mus musculus OX=10090 GN=Nedd4l PE=1 SV=2;tr|A0A286YCR1|A0A286YCR1_MOUSE E3 ubiquitin-protein ligase NEDD4-like (Fragment) OS=Mus musculus OX=10090 GN=Nedd4l PE=1 SV=2;tr|A0A494BA39|A0A494BA39	7	1	1	1	0	0	1	0	0	0	0	0	0	0	0	0	1	0	0	0	0	0	0	0	0	0	1	0	0	0	0	0	0	0	1	1	1	115.42	1004	1004;224;872;912;956;976;1004	1	1
Q9WV92;A0A286YCY1;A0A286YD84;A0A3B2WBE1;A0A286YDY4;A7YY80;D0VYV6;A0A5F8MPR1;A0A5F8MPE1	Q9WV92;A0A286YCY1;A0A286YD84;A0A3B2WBE1;A0A286YDY4;A7YY80;D0VYV6;A0A5F8MPR1;A0A5F8MPE1	1;1;1;1;1;1;1;1;1	1;1;1;1;1;1;1;1;1	1;1;1;1;1;1;1;1;1	Band 4.1-like protein 3;Band 4.1-like protein 3, N-terminally processed	Epb41l3;Epb4.1l3	sp|Q9WV92|E41L3_MOUSE Band 4.1-like protein 3 OS=Mus musculus OX=10090 GN=Epb41l3 PE=1 SV=1;tr|A0A286YCY1|A0A286YCY1_MOUSE Band 4.1-like protein 3 (Fragment) OS=Mus musculus OX=10090 GN=Epb41l3 PE=1 SV=1;tr|A0A286YD84|A0A286YD84_MOUSE Band 4.1-like protein	9	1	1	1	0	0	0	0	0	0	0	0	1	1	0	0	0	0	0	0	0	0	1	1	0	0	0	0	0	0	0	0	1	1	1.1	1.1	1.1	103.34	929	929;262;605;819;852;876;911;951;1052	2
Q8CG46;A0A286YDG5	Q8CG46;A0A286YDG5	1;1	1;1	1;1	Structural maintenance of chromosomes protein 5	Smc5	sp|Q8CG46|SMC5_MOUSE Structural maintenance of chromosomes protein 5 OS=Mus musculus OX=10090 GN=Smc5 PE=1 SV=1;tr|A0A286YDG5|A0A286YDG5_MOUSE Structural maintenance of chromosomes protein 5 OS=Mus musculus OX=10090 GN=Smc5 PE=1 SV=1	2	1	1	1	0	0	0	0	0	0	1	1	1	1	0	0	0	0	0	0	1	1	1	1	0	0	0	0	0	0	1	1	1	1	0.7	0.7	0.7	128.81	1101	1101;1011	1.8	1
P62823;A0A286YDR2;Q9CXS2	P62823;A0A286YDR2;Q9CXS2	2;2;1	2;2;1	2;2;1	Ras-related protein Rab-3C	Rab3c	sp|P62823|RAB3C_MOUSE Ras-related protein Rab-3C OS=Mus musculus OX=10090 GN=Rab3c PE=1 SV=1;tr|A0A286YDR2|A0A286YDR2_MOUSE Ras-related protein Rab-3 OS=Mus musculus OX=10090 GN=Rab3c PE=1 SV=1;tr|Q9CXS2|Q9CXS2_MOUSE Ras-related protein Rab-3C OS=Mus muscu	3	2	2	2	0	0	0	0	0	0	1	2	1	0	0	0	0	0	0	0	1	2	1	0	0	0	0	0	0	0	1	2	1	0	13.2	13.2	13.2	25.872	227	227;225;169	5
Q9QYG0;A0A2I3BPW0;A0A2I3BS20;A0A2I3BQM5;A0A2I3BPL1;A0A2I3BQR5	Q9QYG0;A0A2I3BPW0;A0A2I3BS20;A0A2I3BQM5;A0A2I3BPL1;A0A2I3BQR5	2;2;1;1;1;1	2;2;1;1;1;1	2;2;1;1;1;1	Protein NDRG2	Ndrg2	sp|Q9QYG0|NDRG2_MOUSE Protein NDRG2 OS=Mus musculus OX=10090 GN=Ndrg2 PE=1 SV=1;tr|A0A2I3BPW0|A0A2I3BPW0_MOUSE Protein NDRG2 (Fragment) OS=Mus musculus OX=10090 GN=Ndrg2 PE=1 SV=1;tr|A0A2I3BS20|A0A2I3BS20_MOUSE Protein NDRG2 (Fragment) OS=Mus musculus OX=1	6	2	2	2	0	0	0	0	1	0	0	1	0	0	0	0	0	0	1	0	0	1	0	0	0	0	0	0	1	0	0	1	0	0	6.2	6.2	6.2	40.789	371	371;273;114;114;176;238	4
P47809;A0A2I3BQK8;B1ATL6	P47809;A0A2I3BQK8;B1ATL6	1;1;1	1;1;1	1;1;1	Dual specificity mitogen-activated protein kinase kinase 4	Map2k4	sp|P47809|MP2K4_MOUSE Dual specificity mitogen-activated protein kinase kinase 4 OS=Mus musculus OX=10090 GN=Map2k4 PE=1 SV=2;tr|A0A2I3BQK8|A0A2I3BQK8_MOUSE Dual-specificity mitogen-activated protein kinase kinase 4 (Fragment) OS=Mus musculus OX=10090 GN=M	3	1	1	1	0	0	0	0	0	0	1	0	0	1	0	0	0	0	0	0	1	0	0	1	0	0	0	0	0	0	1	0	0	1	3.3	3.3	3.3	44.113	397	397;34;206	4
A0A2I3BRZ9	A0A2I3BRZ9	1	1	1			tr|A0A2I3BRZ9|A0A2I3BRZ9_MOUSE Predicted gene 5460 (Fragment) OS=Mus musculus OX=10090 GN=Gm5460 PE=3 SV=1	1	1	1	1	0	1	0	0	0	0	0	1	0	0	0	1	0	0	0	0	0	1	0	0	0	1	0	0	0	0	0	1	0	0	2.1	2.1	2.1	58.296	529	529	5
A6X935;A0A2K6EDJ7;E9Q5L2;E9PVD2	A6X935;A0A2K6EDJ7;E9Q5L2;E9PVD2	5;5;5;5	5;5;5;5	5;5;5;5	Inter alpha-trypsin inhibitor, heavy chain 4	Itih4	sp|A6X935|ITIH4_MOUSE Inter alpha-trypsin inhibitor, heavy chain 4 OS=Mus musculus OX=10090 GN=Itih4 PE=1 SV=2;tr|A0A2K6EDJ7|A0A2K6EDJ7_MOUSE Inter alpha-trypsin inhibitor, heavy chain 4 OS=Mus musculus OX=10090 GN=Itih4 PE=1 SV=1;tr|E9Q5L2|E9Q5L2_MOUSE In	4	5	5	5	0	0	0	0	0	0	4	5	0	0	0	0	0	0	0	0	4	5	0	0	0	0	0	0	0	0	4	5	0	0	6.8	6.8	6.8	104.66	942	942;902;925;941	2.41
Q9Z2H5;E9PV14;A2AUK5;A0A2R8VHB6;A2AUK7;A2AUK8	Q9Z2H5;E9PV14;A2AUK5;A0A2R8VHB6;A2AUK7;A2AUK8	1;1;1;1;1;1	1;1;1;1;1;1	1;1;1;1;1;1	Band 4.1-like protein 1	Epb41l1;Epb4.1l1	sp|Q9Z2H5|E41L1_MOUSE Band 4.1-like protein 1 OS=Mus musculus OX=10090 GN=Epb41l1 PE=1 SV=2;tr|E9PV14|E9PV14_MOUSE Band 4.1-like protein 1 OS=Mus musculus OX=10090 GN=Epb41l1 PE=1 SV=2;tr|A2AUK5|A2AUK5_MOUSE Band 4.1-like protein 1 OS=Mus musculus OX=10090	6	1	1	1	0	0	0	0	0	0	1	1	1	1	0	0	0	0	0	0	1	1	1	1	0	0	0	0	0	0	1	1	1	1	1.1	1.1	1.1	98.314	879	879;1556;879;213;730;867	2
A0A2R8VHE2	A0A2R8VHE2	1	1	1			tr|A0A2R8VHE2|A0A2R8VHE2_MOUSE Anti-Muellerian hormone type-2 receptor (Fragment) OS=Mus musculus OX=10090 GN=Amhr2 PE=4 SV=1	1	1	1	1	0	0	0	0	0	0	1	0	0	0	0	0	0	0	0	0	1	0	0	0	0	0	0	0	0	0	1	0	0	0	31.1	31.1	31.1	6.4672	61	61	3
Q61990;A0A2R8VHY9;B2M1R7;A0A2R8VHP9;Q3TT81;A0A2R8VI25;A0A2R8VI12;A0A2R8VI73;A0A2R8VKN0;A0A2R8VHI3;A0A2R8VHZ0;A0A2R8W6L5;A0A2R8VJY1;A0A2R8VKF0;A0A2R8VHG2;A0A2R8VHN3;A0A2R8VI71;P57722;E9Q7D8;A0A2R8VHL8	Q61990;A0A2R8VHY9;B2M1R7;A0A2R8VHP9;Q3TT81;A0A2R8VI25;A0A2R8VI12;A0A2R8VI73;A0A2R8VKN0;A0A2R8VHI3;A0A2R8VHZ0;A0A2R8W6L5;A0A2R8VJY1;A0A2R8VKF0;A0A2R8VHG2;A0A2R8VHN3;A0A2R8VI71;P57722;E9Q7D8;A0A2R8VHL8	2;2;2;2;2;2;2;2;2;2;2;2;2;2;2;2;2;1;1;1	1;1;1;1;1;1;1;1;1;1;1;1;1;1;1;1;1;0;0;1	1;1;1;1;1;1;1;1;1;1;1;1;1;1;1;1;1;0;0;1	Poly(rC)-binding protein 2;Poly(rC)-binding protein 3	Pcbp2;Pcbp3	sp|Q61990|PCBP2_MOUSE Poly(rC)-binding protein 2 OS=Mus musculus OX=10090 GN=Pcbp2 PE=1 SV=1;tr|A0A2R8VHY9|A0A2R8VHY9_MOUSE Poly(rC)-binding protein 2 (Fragment) OS=Mus musculus OX=10090 GN=Pcbp2 PE=1 SV=1;tr|B2M1R7|B2M1R7_MOUSE Poly(rC)-binding protein 2	20	2	1	1	0	0	1	0	0	0	0	1	1	1	0	0	0	0	0	0	0	1	1	1	0	0	0	0	0	0	0	1	1	1	6.6	3.6	3.6	38.221	362	362;249;361;335;322;316;280;264;253;96;231;224;205;190;186;168;241;371;226;225	4
Q9D0M3;A0A2R8VHK1	Q9D0M3;A0A2R8VHK1	2;2	2;2	2;2	Cytochrome c1, heme protein, mitochondrial	Cyc1	sp|Q9D0M3|CY1_MOUSE Cytochrome c1, heme protein, mitochondrial OS=Mus musculus OX=10090 GN=Cyc1 PE=1 SV=1;tr|A0A2R8VHK1|A0A2R8VHK1_MOUSE Cytochrome c1, heme protein, mitochondrial (Fragment) OS=Mus musculus OX=10090 GN=Cyc1 PE=1 SV=1	2	2	2	2	0	1	0	0	0	0	1	1	0	1	0	1	0	0	0	0	1	1	0	1	0	1	0	0	0	0	1	1	0	1	8.6	8.6	8.6	35.327	325	325;165	5
Q8CGR7;A0A2R8W6J9;Q8R093	Q8CGR7;A0A2R8W6J9;Q8R093	1;1;1	1;1;1	1;1;1	Uridine phosphorylase 2;Uridine phosphorylase	Upp2	sp|Q8CGR7|UPP2_MOUSE Uridine phosphorylase 2 OS=Mus musculus OX=10090 GN=Upp2 PE=1 SV=1;tr|A0A2R8W6J9|A0A2R8W6J9_MOUSE Uridine phosphorylase OS=Mus musculus OX=10090 GN=Upp2 PE=1 SV=1;tr|Q8R093|Q8R093_MOUSE Uridine phosphorylase OS=Mus musculus OX=10090 GN	3	1	1	1	1	1	0	0	0	0	1	0	1	1	1	1	0	0	0	0	1	0	1	1	1	1	0	0	0	0	1	0	1	1	4.1	4.1	4.1	35.755	320	320;306;338	2.18	5
Q9Z1S5;A0A2R8W6V9;A0A5F8MPL6;A0A571BE69;A0A2R8VHR7;A0A2R8VHB2	Q9Z1S5;A0A2R8W6V9;A0A5F8MPL6;A0A571BE69	5;5;5;5;2;1	5;5;5;5;2;1	5;5;5;5;2;1	Neuronal-specific septin-3	2003-09-01	sp|Q9Z1S5|SEPT3_MOUSE Neuronal-specific septin-3 OS=Mus musculus OX=10090 GN=Septin3 PE=1 SV=2;tr|A0A2R8W6V9|A0A2R8W6V9_MOUSE Neuronal-specific septin-3 OS=Mus musculus OX=10090 GN=Septin3 PE=1 SV=1;tr|A0A5F8MPL6|A0A5F8MPL6_MOUSE Neuronal-specific septin-3	6	5	5	5	0	3	3	2	1	0	3	3	3	4	0	3	3	2	1	0	3	3	3	4	0	3	3	2	1	0	3	3	3	4	15.1	15.1	15.1	40.037	350	350;341;818;822;201;75	4
Q8K1M6;E9PUD2;A0A2U3TZ67	Q8K1M6;E9PUD2;A0A2U3TZ67	1;1;1	1;1;1	1;1;1	Dynamin-1-like protein	Dnm1l	sp|Q8K1M6|DNM1L_MOUSE Dynamin-1-like protein OS=Mus musculus OX=10090 GN=Dnm1l PE=1 SV=2;tr|E9PUD2|E9PUD2_MOUSE Dynamin-1-like protein OS=Mus musculus OX=10090 GN=Dnm1l PE=1 SV=1;tr|A0A2U3TZ67|A0A2U3TZ67_MOUSE Dynamin-1-like protein OS=Mus musculus OX=1009	3	1	1	1	0	0	0	0	0	0	1	0	1	1	0	0	0	0	0	0	1	0	1	1	0	0	0	0	0	0	1	0	1	1	1.2	1.2	1.2	82.657	742	742;712;587	2
Q62108;A0A338P6E5;A0A338P6I6;G3UZL5;A0A338P7H1;B1AR31;A0A338P6L4;A0A338P6H5;A0A338P713;E9Q3Z8;F6UDT8;J3KMS4;J3QMR8;F6TPQ6;A0A338P746	Q62108;A0A338P6E5;A0A338P6I6;G3UZL5	9;9;9;7;4;4;4;4;3;2;2;1;1;1;1	9;9;9;7;4;4;4;4;3;2;2;1;1;1;1	7;7;7;5;3;3;3;3;2;1;0;1;1;1;1	Disks large homolog 4	Dlg4	sp|Q62108|DLG4_MOUSE Disks large homolog 4 OS=Mus musculus OX=10090 GN=Dlg4 PE=1 SV=1;tr|A0A338P6E5|A0A338P6E5_MOUSE Disks large homolog 4 OS=Mus musculus OX=10090 GN=Dlg4 PE=1 SV=1;tr|A0A338P6I6|A0A338P6I6_MOUSE Disks large homolog 4 OS=Mus musculus OX=10	15	9	9	7	0	0	0	0	0	0	6	9	0	4	0	0	0	0	0	0	6	9	0	4	0	0	0	0	0	0	5	7	0	3	19.3	19.3	14.6	80.471	724	724;664;764;668;198;242;254;273;205;238;358;51;115;130;130	2.14
Q8BTP0;A0A338P6F8;A0A338P6P1;A0A338P6U3	Q8BTP0;A0A338P6F8;A0A338P6P1;A0A338P6U3	1;1;1;1	1;1;1;1	1;1;1;1	GPI mannosyltransferase 4	Pigz	sp|Q8BTP0|PIGZ_MOUSE GPI mannosyltransferase 4 OS=Mus musculus OX=10090 GN=Pigz PE=2 SV=2;tr|A0A338P6F8|A0A338P6F8_MOUSE GPI mannosyltransferase 4 OS=Mus musculus OX=10090 GN=Pigz PE=4 SV=1;tr|A0A338P6P1|A0A338P6P1_MOUSE GPI mannosyltransferase 4 OS=Mus mu	4	1	1	1	0	1	0	0	0	0	1	0	0	0	0	1	0	0	0	0	1	0	0	0	0	1	0	0	0	0	1	0	0	0	2.9	2.9	2.9	62.042	560	560;58;64;74	5
Q91XM9;D3YUZ8;E9Q2L2;A0A571BEK3;A0A571BEZ4;A0A338P6J0;D3YWU0;S4R2T8	Q91XM9;D3YUZ8;E9Q2L2;A0A571BEK3;A0A571BEZ4;A0A338P6J0	3;3;3;3;3;3;1;1	2;2;2;2;2;2;1;0	2;2;2;2;2;2;1;0	Disks large homolog 2	Dlg2	sp|Q91XM9|DLG2_MOUSE Disks large homolog 2 OS=Mus musculus OX=10090 GN=Dlg2 PE=1 SV=2;tr|D3YUZ8|D3YUZ8_MOUSE Disks large homolog 2 OS=Mus musculus OX=10090 GN=Dlg2 PE=1 SV=1;tr|E9Q2L2|E9Q2L2_MOUSE Disks large homolog 2 OS=Mus musculus OX=10090 GN=Dlg2 PE=1	8	3	2	2	0	0	0	0	0	0	3	2	0	1	0	0	0	0	0	0	2	1	0	0	0	0	0	0	0	0	2	1	0	0	6.3	3.4	3.4	94.879	852	852;755;870;901;919;994;481;558	2
A0A338P6R8;A0A338P769;Q9Z2Q6;B7ZNM7;A0A338P729;A0A338P755	A0A338P6R8;A0A338P769;Q9Z2Q6;B7ZNM7;A0A338P729	8;8;7;7;6;3	8;8;7;7;6;3	8;8;7;7;6;3	Septin-5	2005-09-01	tr|A0A338P6R8|A0A338P6R8_MOUSE Septin OS=Mus musculus OX=10090 GN=Gm49601 PE=3 SV=1;tr|A0A338P769|A0A338P769_MOUSE Septin OS=Mus musculus OX=10090 GN=Septin5 PE=1 SV=1;sp|Q9Z2Q6|SEPT5_MOUSE Septin-5 OS=Mus musculus OX=10090 GN=Septin5 PE=1 SV=2;tr|B7ZNM7|B	6	8	8	8	2	1	7	1	1	0	6	7	4	5	2	1	7	1	1	0	6	7	4	5	2	1	7	1	1	0	6	7	4	5	23.6	23.6	23.6	41.949	365	365;378;369;381;248;126	4
Q3U0V1;A0A3B2WCD8	Q3U0V1;A0A3B2WCD8	2;2	2;2	2;2	Far upstream element-binding protein 2	Khsrp	sp|Q3U0V1|FUBP2_MOUSE Far upstream element-binding protein 2 OS=Mus musculus OX=10090 GN=Khsrp PE=1 SV=2;tr|A0A3B2WCD8|A0A3B2WCD8_MOUSE Far upstream element-binding protein 2 OS=Mus musculus OX=10090 GN=Khsrp PE=1 SV=1	2	2	2	2	0	0	0	2	0	0	0	0	0	0	0	0	0	2	0	0	0	0	0	0	0	0	0	2	0	0	0	0	0	0	4.1	4.1	4.1	76.775	748	748;721	1.67	1
P70414;A0A3Q4EBU5;Q68FL0;G5E8Y0;G3X9J1;A0A3Q4L326	P70414;A0A3Q4EBU5;Q68FL0;G5E8Y0;G3X9J1;A0A3Q4L326	11;11;11;11;11;8	11;11;11;11;11;8	11;11;11;11;11;8	Sodium/calcium exchanger 1	Slc8a1	sp|P70414|NAC1_MOUSE Sodium/calcium exchanger 1 OS=Mus musculus OX=10090 GN=Slc8a1 PE=1 SV=1;tr|A0A3Q4EBU5|A0A3Q4EBU5_MOUSE Na(+)/Ca(2+)-exchange protein 1 OS=Mus musculus OX=10090 GN=Slc8a1 PE=1 SV=1;tr|Q68FL0|Q68FL0_MOUSE Na(+)/Ca(2+)-exchange protein 1	6	11	11	11	0	0	3	0	0	0	9	9	1	4	0	0	3	0	0	0	9	9	1	4	0	0	3	0	0	0	9	9	1	4	13	13	13	108.03	970	970;940;958;970;970;599	1.29	24
Q9D1G1;A0A494B945	Q9D1G1;A0A494B945	1;1	1;1	1;1	Ras-related protein Rab-1B	Rab1b	sp|Q9D1G1|RAB1B_MOUSE Ras-related protein Rab-1B OS=Mus musculus OX=10090 GN=Rab1b PE=1 SV=1;tr|A0A494B945|A0A494B945_MOUSE Ras-related protein Rab-1B (Fragment) OS=Mus musculus OX=10090 GN=Rab1b PE=1 SV=1	2	1	1	1	0	0	0	0	0	0	1	1	0	0	0	0	0	0	0	0	1	1	0	0	0	0	0	0	0	0	1	1	0	0	8	8	8	22.187	201	201;254	5
P18760;A0A494B9A7;F8WGL3;P45591	P18760;A0A494B9A7;F8WGL3	3;3;3;1	3;3;3;1	3;3;3;1	Cofilin-1	Cfl1	sp|P18760|COF1_MOUSE Cofilin-1 OS=Mus musculus OX=10090 GN=Cfl1 PE=1 SV=3;tr|A0A494B9A7|A0A494B9A7_MOUSE Cofilin, non-muscle isoform OS=Mus musculus OX=10090 GN=Cfl1 PE=1 SV=1;tr|F8WGL3|F8WGL3_MOUSE Cofilin, non-muscle isoform OS=Mus musculus OX=10090 GN=C	4	3	3	3	0	2	1	0	0	0	1	3	0	2	0	2	1	0	0	0	1	3	0	2	0	2	1	0	0	0	1	3	0	2	24.1	24.1	24.1	18.559	166	166;178;227;166	5
Q8CD54;A0A494B9D1;S4R2S0;A0A494B9V6;E9QNW4	Q8CD54;A0A494B9D1;S4R2S0;A0A494B9V6;E9QNW4	1;1;1;1;1	1;1;1;1;1	1;1;1;1;1	Piezo-type mechanosensitive ion channel component 2;Piezo-type mechanosensitive ion channel component	Piezo2	sp|Q8CD54|PIEZ2_MOUSE Piezo-type mechanosensitive ion channel component 2 OS=Mus musculus OX=10090 GN=Piezo2 PE=1 SV=2;tr|A0A494B9D1|A0A494B9D1_MOUSE Piezo-type mechanosensitive ion channel component OS=Mus musculus OX=10090 GN=Piezo2 PE=3 SV=1;tr|S4R2S0|S	5	1	1	1	0	0	1	0	0	0	0	0	0	0	0	0	1	0	0	0	0	0	0	0	0	0	1	0	0	0	0	0	0	0	0.4	0.4	0.4	325.62	2822	2822;2690;2753;2778;2824	3
A0A494B9S6;O35089	A0A494B9S6;O35089	1;1	1;1	1;1	Protein cornichon homolog 2	Cnih2	tr|A0A494B9S6|A0A494B9S6_MOUSE Protein cornichon homolog 2 OS=Mus musculus OX=10090 GN=Cnih2 PE=1 SV=1;sp|O35089|CNIH2_MOUSE Protein cornichon homolog 2 OS=Mus musculus OX=10090 GN=Cnih2 PE=1 SV=2	2	1	1	1	0	0	0	0	0	0	1	1	1	1	0	0	0	0	0	0	1	1	1	1	0	0	0	0	0	0	1	1	1	1	22.6	22.6	22.6	6.877	62	62;160	3.83	1
Q8K3J1;A0A494BAW8	Q8K3J1;A0A494BAW8	2;2	2;2	2;2	NADH dehydrogenase [ubiquinone] iron-sulfur protein 8, mitochondrial	Ndufs8	sp|Q8K3J1|NDUS8_MOUSE NADH dehydrogenase [ubiquinone] iron-sulfur protein 8, mitochondrial OS=Mus musculus OX=10090 GN=Ndufs8 PE=1 SV=1;tr|A0A494BAW8|A0A494BAW8_MOUSE NADH dehydrogenase [ubiquinone] iron-sulfur protein 8, mitochondrial (Fragment) OS=Mus mu	2	2	2	2	0	1	0	0	0	0	0	2	1	0	0	1	0	0	0	0	0	2	1	0	0	1	0	0	0	0	0	2	1	0	9.4	9.4	9.4	24.038	212	212;67	5
P61164;Q8R5C5;A0A494BB86	P61164;Q8R5C5;A0A494BB86	1;1;1	1;1;1	1;1;1	Alpha-centractin;Beta-centractin	Actr1a;Actr1b	sp|P61164|ACTZ_MOUSE Alpha-centractin OS=Mus musculus OX=10090 GN=Actr1a PE=1 SV=1;sp|Q8R5C5|ACTY_MOUSE Beta-centractin OS=Mus musculus OX=10090 GN=Actr1b PE=1 SV=1;tr|A0A494BB86|A0A494BB86_MOUSE Alpha-centractin OS=Mus musculus OX=10090 GN=Actr1a PE=1 SV=	3	1	1	1	0	0	0	0	0	0	0	1	1	0	0	0	0	0	0	0	0	1	1	0	0	0	0	0	0	0	0	1	1	0	4.3	4.3	4.3	42.613	376	376;376;332	3.33
Q80XI6;A0A494BBI0	Q80XI6;A0A494BBI0	1;1	1;1	1;1	Mitogen-activated protein kinase kinase kinase 11	Map3k11	sp|Q80XI6|M3K11_MOUSE Mitogen-activated protein kinase kinase kinase 11 OS=Mus musculus OX=10090 GN=Map3k11 PE=1 SV=1;tr|A0A494BBI0|A0A494BBI0_MOUSE Mitogen-activated protein kinase kinase kinase 11 (Fragment) OS=Mus musculus OX=10090 GN=Map3k11 PE=1 SV=1	2	1	1	1	1	0	0	0	0	0	1	0	1	0	1	0	0	0	0	0	1	0	1	0	1	0	0	0	0	0	1	0	1	0	1.5	1.5	1.5	93.225	850	850;543	3.6
P04370;A0A498WGS3	P04370;A0A498WGS3	5;5	5;5	5;5	Myelin basic protein	Mbp	sp|P04370|MBP_MOUSE Myelin basic protein OS=Mus musculus OX=10090 GN=Mbp PE=1 SV=2;tr|A0A498WGS3|A0A498WGS3_MOUSE Myelin basic protein OS=Mus musculus OX=10090 GN=Mbp PE=1 SV=1	2	5	5	5	5	4	2	0	0	1	5	5	5	5	5	4	2	0	0	1	5	5	5	5	5	4	2	0	0	1	5	5	5	5	15.2	15.2	15.2	27.167	250	250;150	3.67	16
Q6P6L5;D3YU50;A0A571BEN1	Q6P6L5;D3YU50;A0A571BEN1	1;1;1	1;1;1	1;1;1		Mybpc1	tr|Q6P6L5|Q6P6L5_MOUSE Myosin-binding protein C, slow-type OS=Mus musculus OX=10090 GN=Mybpc1 PE=1 SV=1;tr|D3YU50|D3YU50_MOUSE Myosin-binding protein C, slow-type OS=Mus musculus OX=10090 GN=Mybpc1 PE=1 SV=1;tr|A0A571BEN1|A0A571BEN1_MOUSE Myosin-binding pr	3	1	1	1	0	0	0	1	0	0	0	0	0	0	0	0	0	1	0	0	0	0	0	0	0	0	0	1	0	0	0	0	0	0	1.1	1.1	1.1	126.2	1124	1124;1127;1139	5
A0A571BEN9	A0A571BEN9	1	1	1			tr|A0A571BEN9|A0A571BEN9_MOUSE Putative deoxyribonuclease TATDN1 (Fragment) OS=Mus musculus OX=10090 GN=Tatdn1 PE=1 SV=1	1	1	1	1	0	0	0	0	0	0	0	1	0	0	0	0	0	0	0	0	0	1	0	0	0	0	0	0	0	0	0	1	0	0	9	9	9	13.596	122	122	3
Q6P9R4;A0A5F8MPF6;A0A5F8MPH6	Q6P9R4;A0A5F8MPF6;A0A5F8MPH6	1;1;1	1;1;1	1;1;1	Rho guanine nucleotide exchange factor 18	Arhgef18	sp|Q6P9R4|ARHGI_MOUSE Rho guanine nucleotide exchange factor 18 OS=Mus musculus OX=10090 GN=Arhgef18 PE=1 SV=3;tr|A0A5F8MPF6|A0A5F8MPF6_MOUSE Rho guanine nucleotide exchange factor 18 OS=Mus musculus OX=10090 GN=Arhgef18 PE=1 SV=1;tr|A0A5F8MPH6|A0A5F8MPH6_	3	1	1	1	0	0	0	0	0	0	0	1	0	0	0	0	0	0	0	0	0	1	0	0	0	0	0	0	0	0	0	1	0	0	0.6	0.6	0.6	155.98	1405	1405;1126;1405	4
Q501J7;Q2M3X8;A0A5F8MPG5;A0A5F8MPI2;B1B1B8	Q501J7;Q2M3X8;A0A5F8MPG5;A0A5F8MPI2;B1B1B8	1;1;1;1;1	1;1;1;1;1	1;1;1;1;1	Phosphatase and actin regulator 4;Phosphatase and actin regulator 1;Phosphatase and actin regulator	Phactr4;Phactr1	sp|Q501J7|PHAR4_MOUSE Phosphatase and actin regulator 4 OS=Mus musculus OX=10090 GN=Phactr4 PE=1 SV=2;sp|Q2M3X8|PHAR1_MOUSE Phosphatase and actin regulator 1 OS=Mus musculus OX=10090 GN=Phactr1 PE=1 SV=1;tr|A0A5F8MPG5|A0A5F8MPG5_MOUSE Phosphatase and actin	5	1	1	1	0	0	0	0	0	0	0	0	1	1	0	0	0	0	0	0	0	0	1	1	0	0	0	0	0	0	0	0	1	1	1.9	1.9	1.9	76.631	694	694;580;124;128;557	2
Q6NXK7;D3Z5I7;A0A5F8MPK1;E9QN98	Q6NXK7;D3Z5I7;A0A5F8MPK1;E9QN98	3;3;3;3	2;2;2;2	2;2;2;2	Inactive dipeptidyl peptidase 10	Dpp10	sp|Q6NXK7|DPP10_MOUSE Inactive dipeptidyl peptidase 10 OS=Mus musculus OX=10090 GN=Dpp10 PE=1 SV=1;tr|D3Z5I7|D3Z5I7_MOUSE Inactive dipeptidyl peptidase 10 OS=Mus musculus OX=10090 GN=Dpp10 PE=1 SV=2;tr|A0A5F8MPK1|A0A5F8MPK1_MOUSE Inactive dipeptidyl peptid	4	3	2	2	0	0	1	0	0	0	1	2	0	0	0	0	1	0	0	0	1	1	0	0	0	0	1	0	0	0	1	1	0	0	4.4	3.3	3.3	90.825	797	797;789;796;800	2
Q61548;Q3TWS4;E9Q9A3;E9QQ05;A0A5F8MPL3;E9QLK9;A0A087WSI9;Q7M6Y3;A0A140LHG9	Q61548;Q3TWS4;E9Q9A3;E9QQ05;A0A5F8MPL3;E9QLK9;A0A087WSI9;Q7M6Y3;A0A140LHG9	4;4;4;4;4;4;3;2;2	4;4;4;4;4;4;3;2;2	4;4;4;4;4;4;3;2;2	Clathrin coat assembly protein AP180;Phosphatidylinositol-binding clathrin assembly protein	Snap91;Picalm	sp|Q61548|AP180_MOUSE Clathrin coat assembly protein AP180 OS=Mus musculus OX=10090 GN=Snap91 PE=1 SV=1;tr|Q3TWS4|Q3TWS4_MOUSE Clathrin coat assembly protein AP180 OS=Mus musculus OX=10090 GN=Snap91 PE=1 SV=1;tr|E9Q9A3|E9Q9A3_MOUSE Clathrin coat assembly p	9	4	4	4	0	0	2	0	0	0	0	4	1	3	0	0	2	0	0	0	0	4	1	3	0	0	2	0	0	0	0	4	1	3	5.9	5.9	5.9	91.85	901	901;582;838;868;894;901;219;660;85	1.54	10
P24638;A0A5F8MPS7;B7ZCF4;B7ZCF5	P24638;A0A5F8MPS7	9;9;4;4	9;9;4;4	9;9;4;4	Lysosomal acid phosphatase	Acp2	sp|P24638|PPAL_MOUSE Lysosomal acid phosphatase OS=Mus musculus OX=10090 GN=Acp2 PE=1 SV=2;tr|A0A5F8MPS7|A0A5F8MPS7_MOUSE Lysosomal acid phosphatase OS=Mus musculus OX=10090 GN=Acp2 PE=1 SV=1	4	9	9	9	0	0	9	0	0	0	0	0	0	0	0	0	9	0	0	0	0	0	0	0	0	0	9	0	0	0	0	0	0	0	19.9	19.9	19.9	48.508	423	423;434;166;305	2.36
M0QWJ9;A0A5F8MQ13	M0QWJ9;A0A5F8MQ13	1;1	1;1	1;1		Tmem178b	tr|M0QWJ9|M0QWJ9_MOUSE Transmembrane protein 178B OS=Mus musculus OX=10090 GN=Tmem178b PE=1 SV=2;tr|A0A5F8MQ13|A0A5F8MQ13_MOUSE Transmembrane protein 178B OS=Mus musculus OX=10090 GN=Tmem178b PE=1 SV=1	2	1	1	1	0	0	0	0	0	0	1	1	0	0	0	0	0	0	0	0	1	1	0	0	0	0	0	0	0	0	1	1	0	0	4.6	4.6	4.6	29.844	262	262;294	5
B1AWN6;A2ASI5;A0A5H1ZRM8;F7D6J5;F6U329;Q9WTU3;Q62205;Q9ER60;F8VPQ7;F7D6K4;E9PW82;A2APX8;B1AYL0;A0A0J9YUW5;G3X8T7;A2APX9;A0A0J9YVF2;A0A571BFW3;A0A0J9YTW2;F7AMU5;A0A0R4J1M7;K3W4N7;A0A0J9YTW4;Q9JJV9;F6U9Y2	B1AWN6;A2ASI5;A0A5H1ZRM8;F7D6J5;F6U329;Q9WTU3;Q62205;Q9ER60;F8VPQ7;F7D6K4;E9PW82;A2APX8;B1AYL0;A0A0J9YUW5;G3X8T7	3;3;3;2;2;2;2;2;2;2;2;2;2;2;2;1;1;1;1;1;1;1;1;1;1	3;3;3;2;2;2;2;2;2;2;2;2;2;2;2;1;1;1;1;1;1;1;1;1;1	3;3;3;2;2;2;2;2;2;2;2;2;2;2;2;1;1;1;1;1;1;1;1;1;1	Sodium channel protein;Sodium channel protein type 8 subunit alpha;Sodium channel protein type 9 subunit alpha;Sodium channel protein type 4 subunit alpha	Scn2a1;Scn3a;Scn8a;Scn9a;Scn4a;Scn1a	sp|B1AWN6|SCN2A_MOUSE Sodium channel protein type 2 subunit alpha OS=Mus musculus OX=10090 GN=Scn2a PE=1 SV=1;sp|A2ASI5|SCN3A_MOUSE Sodium channel protein type 3 subunit alpha OS=Mus musculus OX=10090 GN=Scn3a PE=1 SV=1;tr|A0A5H1ZRM8|A0A5H1ZRM8_MOUSE Sodiu	25	3	3	3	0	0	0	0	0	0	2	1	0	1	0	0	0	0	0	0	2	1	0	1	0	0	0	0	0	0	2	1	0	1	1.8	1.8	1.8	227.94	2006	2006;1947;2006;1988;1978;1978;1984;1841;1975;1978;1973;2009;1973;1937;1841;500;502;880;539;504;2020;2020;804;2019;122	1	4
P20357;A0A668KLC6;Q3TLQ0;G3UZV6;Q80X35;Q80ZL4;G3UZK9;G3UZJ2;G3UWW1;G3UZE9;F7ALC8	P20357;A0A668KLC6	18;18;5;5;5;5;5;4;4;2;1	18;18;5;5;5;5;5;4;4;2;1	18;18;5;5;5;5;5;4;4;2;1	Microtubule-associated protein 2	Map2	sp|P20357|MTAP2_MOUSE Microtubule-associated protein 2 OS=Mus musculus OX=10090 GN=Map2 PE=1 SV=2;tr|A0A668KLC6|A0A668KLC6_MOUSE Microtubule-associated protein OS=Mus musculus OX=10090 GN=Map2 PE=1 SV=1	11	18	18	18	2	8	2	2	0	0	8	16	12	14	2	8	2	2	0	0	8	16	12	14	2	8	2	2	0	0	8	16	12	14	12.4	12.4	12.4	199.13	1828	1828;1989;498;381;466;467;608;240;336;565;262	1.03	64
O88343;E9Q8N8;A7E1Z5;A0A668KM61	O88343;E9Q8N8;A7E1Z5;A0A668KM61	4;4;4;4	3;3;3;3	3;3;3;3	Electrogenic sodium bicarbonate cotransporter 1;Anion exchange protein	Slc4a4	sp|O88343|S4A4_MOUSE Electrogenic sodium bicarbonate cotransporter 1 OS=Mus musculus OX=10090 GN=Slc4a4 PE=1 SV=2;tr|E9Q8N8|E9Q8N8_MOUSE Anion exchange protein OS=Mus musculus OX=10090 GN=Slc4a4 PE=1 SV=1;tr|A7E1Z5|A7E1Z5_MOUSE Anion exchange protein OS=Mu	4	4	3	3	0	0	0	0	0	0	3	3	0	2	0	0	0	0	0	0	2	3	0	2	0	0	0	0	0	0	2	3	0	2	4.4	3.5	3.5	121.48	1079	1079;1094;1070;1111	1	7
Q5SS00;B1AU71;A0A6I8MWW6	Q5SS00;B1AU71;A0A6I8MWW6	1;1;1	1;1;1	1;1;1	DBF4-type zinc finger-containing protein 2 homolog	Zdbf2	sp|Q5SS00|ZDBF2_MOUSE DBF4-type zinc finger-containing protein 2 homolog OS=Mus musculus OX=10090 GN=Zdbf2 PE=2 SV=1;tr|B1AU71|B1AU71_MOUSE DBF4-type zinc finger-containing protein 2 homolog (Fragment) OS=Mus musculus OX=10090 GN=Zdbf2 PE=1 SV=1;tr|A0A6I8M	3	1	1	1	0	0	0	0	1	0	0	0	0	0	0	0	0	0	1	0	0	0	0	0	0	0	0	0	1	0	0	0	0	0	0.4	0.4	0.4	273.74	2493	2493;50;2498	2
A0A6I8MWY3	A0A6I8MWY3	1	1	1			tr|A0A6I8MWY3|A0A6I8MWY3_MOUSE SH3 and multiple ankyrin repeat domains protein 2 OS=Mus musculus OX=10090 GN=Shank2 PE=1 SV=1	1	1	1	1	0	0	0	1	0	0	0	0	0	0	0	0	0	1	0	0	0	0	0	0	0	0	0	1	0	0	0	0	0	0	1.1	1.1	1.1	137.86	1281	1281	2.5
Q8CJG0;Q8CJF8;Q8CJG1;Q8CJF9;H3BJ70;A0A6I8MX18	Q8CJG0;Q8CJF8;Q8CJG1;Q8CJF9;H3BJ70;A0A6I8MX18	1;1;1;1;1;1	1;1;1;1;1;1	1;1;1;1;1;1	Protein argonaute-2;Protein argonaute-4;Protein argonaute-1;Protein argonaute-3	Ago2;Ago4;Ago1;Ago3	sp|Q8CJG0|AGO2_MOUSE Protein argonaute-2 OS=Mus musculus OX=10090 GN=Ago2 PE=1 SV=3;sp|Q8CJF8|AGO4_MOUSE Protein argonaute-4 OS=Mus musculus OX=10090 GN=Ago4 PE=2 SV=2;sp|Q8CJG1|AGO1_MOUSE Protein argonaute-1 OS=Mus musculus OX=10090 GN=Ago1 PE=1 SV=2;sp|Q	6	1	1	1	0	0	0	0	0	0	1	1	0	0	0	0	0	0	0	0	1	1	0	0	0	0	0	0	0	0	1	1	0	0	0.9	0.9	0.9	97.303	860	860;861;857;860;553;895	2
P16125;A0A6I8MX27;D3Z7F0;A0A0N4SVV8	P16125;A0A6I8MX27;D3Z7F0	9;9;5;3	9;9;5;3	8;8;4;2	L-lactate dehydrogenase B chain;L-lactate dehydrogenase	Ldhb	sp|P16125|LDHB_MOUSE L-lactate dehydrogenase B chain OS=Mus musculus OX=10090 GN=Ldhb PE=1 SV=2;tr|A0A6I8MX27|A0A6I8MX27_MOUSE L-lactate dehydrogenase OS=Mus musculus OX=10090 GN=Ldhb PE=1 SV=1;tr|D3Z7F0|D3Z7F0_MOUSE L-lactate dehydrogenase (Fragment) OS=M	4	9	9	8	1	0	1	0	0	0	5	7	0	4	1	0	1	0	0	0	5	7	0	4	1	0	0	0	0	0	5	7	0	4	29	29	25.4	36.572	334	334;341;198;193	3.95
A0A6I8MX30;Q8K093	A0A6I8MX30;Q8K093	2;2	2;2	2;2	Thyrotropin-releasing hormone-degrading ectoenzyme	Trhde	tr|A0A6I8MX30|A0A6I8MX30_MOUSE Thyrotropin-releasing hormone-degrading ectoenzyme OS=Mus musculus OX=10090 GN=Trhde PE=1 SV=1;sp|Q8K093|TRHDE_MOUSE Thyrotropin-releasing hormone-degrading ectoenzyme OS=Mus musculus OX=10090 GN=Trhde PE=1 SV=1	2	2	2	2	0	0	0	0	0	0	1	2	0	0	0	0	0	0	0	0	1	2	0	0	0	0	0	0	0	0	1	2	0	0	2.1	2.1	2.1	122.15	1066	1066;1025	1.33	2
Q9R1T4;A2A3W1;Q8C1B7;A0A0J9YUV6;A0A0J9YTY0;A0A0J9YUL3	Q9R1T4;A2A3W1;Q8C1B7;A0A0J9YUV6;A0A0J9YTY0;A0A0J9YUL3	2;2;1;1;1;1	2;2;1;1;1;1	2;2;1;1;1;1	Septin-6;Septin-11	Sept6;Sept11	sp|Q9R1T4|SEPT6_MOUSE Septin-6 OS=Mus musculus OX=10090 GN=Septin6 PE=1 SV=4;tr|A2A3W1|A2A3W1_MOUSE Septin-6 (Fragment) OS=Mus musculus OX=10090 GN=Septin6 PE=1 SV=1;sp|Q8C1B7|SEP11_MOUSE Septin-11 OS=Mus musculus OX=10090 GN=Septin11 PE=1 SV=4;tr|A0A0J9YU	6	2	2	2	0	0	0	0	0	0	1	1	0	1	0	0	0	0	0	0	1	1	0	1	0	0	0	0	0	0	1	1	0	1	7.1	7.1	7.1	49.619	434	434;141;431;97;425;432	3
Q80UG5;A2A6U5;A2A6U3;A8Y5D3	Q80UG5;A2A6U5;A2A6U3	3;3;3;1	3;3;3;1	3;3;3;1	Septin-9	2009-09-01	sp|Q80UG5|SEPT9_MOUSE Septin-9 OS=Mus musculus OX=10090 GN=Septin9 PE=1 SV=1;tr|A2A6U5|A2A6U5_MOUSE Septin-9 (Fragment) OS=Mus musculus OX=10090 GN=Septin9 PE=1 SV=1;tr|A2A6U3|A2A6U3_MOUSE Septin-9 OS=Mus musculus OX=10090 GN=Septin9 PE=1 SV=1	4	3	3	3	0	0	0	0	0	0	1	2	0	1	0	0	0	0	0	0	1	2	0	1	0	0	0	0	0	0	1	2	0	1	4.8	4.8	4.8	65.574	583	583;242;565;74	4
A2A870	A2A870	2	2	2	Fas-binding factor 1	Fbf1	sp|A2A870|FBF1_MOUSE Fas-binding factor 1 OS=Mus musculus OX=10090 GN=Fbf1 PE=1 SV=1	1	2	2	2	0	0	0	1	0	1	0	0	0	0	0	0	0	1	0	1	0	0	0	0	0	0	0	1	0	1	0	0	0	0	2.1	2.1	2.1	130.14	1173	1173	5
Q922Q4;Q922W5;A2ABZ2	Q922Q4;Q922W5;A2ABZ2	1;1;1	1;1;1	1;1;1	Pyrroline-5-carboxylate reductase 2;Pyrroline-5-carboxylate reductase 1, mitochondrial	Pycr2;Pycr1	sp|Q922Q4|P5CR2_MOUSE Pyrroline-5-carboxylate reductase 2 OS=Mus musculus OX=10090 GN=Pycr2 PE=1 SV=1;sp|Q922W5|P5CR1_MOUSE Pyrroline-5-carboxylate reductase 1, mitochondrial OS=Mus musculus OX=10090 GN=Pycr1 PE=1 SV=1;tr|A2ABZ2|A2ABZ2_MOUSE Pyrroline-5-ca	3	1	1	1	0	0	0	1	0	0	0	0	0	0	0	0	0	1	0	0	0	0	0	0	0	0	0	1	0	0	0	0	0	0	3.4	3.4	3.4	33.659	320	320;309;238	4
A2ACT7	A2ACT7	1	1	1		Col9a3	tr|A2ACT7|A2ACT7_MOUSE Collagen, type IX, alpha 3 OS=Mus musculus OX=10090 GN=Col9a3 PE=1 SV=1	1	1	1	1	1	0	0	0	0	0	0	0	0	1	1	0	0	0	0	0	0	0	0	1	1	0	0	0	0	0	0	0	0	1	2.9	2.9	2.9	63.474	680	680	3	1
P10649;A2AE89;F6WHQ7;P19639;Q80W21;D3YVP6;E9QAC8;D3YVP5;P15626;D3YX76;O35660;Q8R5I6;G5E8M7;D3YVP9;D3YZ29;A2AE91;D3YVP8	P10649;A2AE89;F6WHQ7	13;13;8;4;3;3;3;3;2;2;1;1;1;1;1;1;1	13;13;8;4;3;3;3;3;2;2;1;1;1;1;1;1;1	13;13;8;4;3;3;3;3;2;2;1;1;1;1;1;1;1	Glutathione S-transferase Mu 1	Gstm1	sp|P10649|GSTM1_MOUSE Glutathione S-transferase Mu 1 OS=Mus musculus OX=10090 GN=Gstm1 PE=1 SV=2;tr|A2AE89|A2AE89_MOUSE Glutathione transferase OS=Mus musculus OX=10090 GN=Gstm1 PE=1 SV=2;tr|F6WHQ7|F6WHQ7_MOUSE Glutathione S-transferase Mu 1 (Fragment) OS=	17	13	13	13	11	10	1	10	8	1	8	9	10	9	11	10	1	10	8	1	8	9	10	9	11	10	1	10	8	1	8	9	10	9	57.8	57.8	57.8	25.97	218	218;244;194;218;218;181;193;214;218;184;218;218;232;154;119;184;123	5
Q99N15;A2AFQ2;O08756	Q99N15;A2AFQ2;O08756	2;2;1	2;2;1	2;2;1	3-hydroxyacyl-CoA dehydrogenase type-2	Hsd17b10	tr|Q99N15|Q99N15_MOUSE 17beta-hydroxysteroid dehydrogenase type 10/short chain L-3-hydroxyacyl-CoA dehydrogenase OS=Mus musculus OX=10090 GN=Hsd17b10 PE=1 SV=1;tr|A2AFQ2|A2AFQ2_MOUSE 3-hydroxyacyl-CoA dehydrogenase type-2 OS=Mus musculus OX=10090 GN=Hsd17b	3	2	2	2	0	0	0	0	0	0	1	2	1	0	0	0	0	0	0	0	1	2	1	0	0	0	0	0	0	0	1	2	1	0	12.3	12.3	12.3	27.273	261	261;271;261	5
Q791V5;A2AFW6;Q9D050	Q791V5;A2AFW6;Q9D050	2;2;2	2;2;2	2;2;2	Mitochondrial carrier homolog 2	Mtch2	sp|Q791V5|MTCH2_MOUSE Mitochondrial carrier homolog 2 OS=Mus musculus OX=10090 GN=Mtch2 PE=1 SV=1;tr|A2AFW6|A2AFW6_MOUSE Mitochondrial carrier homolog 2 OS=Mus musculus OX=10090 GN=Mtch2 PE=1 SV=1;tr|Q9D050|Q9D050_MOUSE Mitochondrial carrier homolog 2 OS=M	3	2	2	2	0	0	2	0	0	0	0	0	0	0	0	0	2	0	0	0	0	0	0	0	0	0	2	0	0	0	0	0	0	0	5.3	5.3	5.3	33.499	303	303;294;312	4
Q99JB2;A2AG41	Q99JB2;A2AG41	1;1	1;1	1;1	Stomatin-like protein 2, mitochondrial	Stoml2	sp|Q99JB2|STML2_MOUSE Stomatin-like protein 2, mitochondrial OS=Mus musculus OX=10090 GN=Stoml2 PE=1 SV=1;tr|A2AG41|A2AG41_MOUSE Stomatin-like protein 2, mitochondrial (Fragment) OS=Mus musculus OX=10090 GN=Stoml2 PE=1 SV=10	2	1	1	1	0	1	1	0	0	0	0	1	0	0	0	1	1	0	0	0	0	1	0	0	0	1	1	0	0	0	0	1	0	0	4.2	4.2	4.2	38.384	353	353;212	4
Q8BYM5;A2AGI3;A2AGI2;A2AGI0	Q8BYM5;A2AGI3;A2AGI2;A2AGI0	4;4;4;3	3;3;3;2	3;3;3;2	Neuroligin-3	Nlgn3	sp|Q8BYM5|NLGN3_MOUSE Neuroligin-3 OS=Mus musculus OX=10090 GN=Nlgn3 PE=1 SV=2;tr|A2AGI3|A2AGI3_MOUSE Neuroligin-3 OS=Mus musculus OX=10090 GN=Nlgn3 PE=1 SV=1;tr|A2AGI2|A2AGI2_MOUSE Neuroligin-3 OS=Mus musculus OX=10090 GN=Nlgn3 PE=1 SV=1;tr|A2AGI0|A2AGI0_	4	4	3	3	0	0	0	0	0	0	4	4	2	3	0	0	0	0	0	0	3	3	1	2	0	0	0	0	0	0	3	3	1	2	6.7	5.1	5.1	91.161	825	825;711;845;510	1.82	2
Q8CH72;A2AGS0;A2AGS1	Q8CH72;A2AGS0;A2AGS1	1;1;1	1;1;1	1;1;1	E3 ubiquitin-protein ligase TRIM32	Trim32	sp|Q8CH72|TRI32_MOUSE E3 ubiquitin-protein ligase TRIM32 OS=Mus musculus OX=10090 GN=Trim32 PE=1 SV=2;tr|A2AGS0|A2AGS0_MOUSE E3 ubiquitin-protein ligase TRIM32 (Fragment) OS=Mus musculus OX=10090 GN=Trim32 PE=1 SV=1;tr|A2AGS1|A2AGS1_MOUSE E3 ubiquitin-prot	3	1	1	1	0	0	0	0	0	0	0	0	0	1	0	0	0	0	0	0	0	0	0	1	0	0	0	0	0	0	0	0	0	1	2.3	2.3	2.3	72.057	655	655;136;183	2
A2AJ72;Q3TIX6;A0A0A6YY39;A0A0A6YX76;A2AJ71;A0A0A6YVV5;F7AM43	A2AJ72;Q3TIX6;A0A0A6YY39	3;3;2;1;1;1;1	3;3;2;1;1;1;1	3;3;2;1;1;1;1		Fubp3	tr|A2AJ72|A2AJ72_MOUSE Far upstream element (FUSE)-binding protein 3 OS=Mus musculus OX=10090 GN=Fubp3 PE=1 SV=1;tr|Q3TIX6|Q3TIX6_MOUSE Far upstream element (FUSE)-binding protein 3 OS=Mus musculus OX=10090 GN=Fubp3 PE=1 SV=1;tr|A0A0A6YY39|A0A0A6YY39_MOUSE	7	3	3	3	0	0	3	0	0	0	0	0	0	0	0	0	3	0	0	0	0	0	0	0	0	0	3	0	0	0	0	0	0	0	6.5	6.5	6.5	61.447	569	569;575;123;83;97;191;264	2
Q91VR2;Q8C2Q8;A2AKU9;A2AKV1;A2AKV2;A2AKV3;A2AKV0	Q91VR2;Q8C2Q8;A2AKU9;A2AKV1;A2AKV2;A2AKV3	7;7;7;6;6;6;3	7;7;7;6;6;6;3	7;7;7;6;6;6;3	ATP synthase subunit gamma, mitochondrial;ATP synthase subunit gamma	Atp5c1	sp|Q91VR2|ATPG_MOUSE ATP synthase subunit gamma, mitochondrial OS=Mus musculus OX=10090 GN=Atp5f1c PE=1 SV=1;tr|Q8C2Q8|Q8C2Q8_MOUSE ATP synthase subunit gamma OS=Mus musculus OX=10090 GN=Atp5c1 PE=1 SV=1;tr|A2AKU9|A2AKU9_MOUSE ATP synthase subunit gamma OS	7	7	7	7	0	1	2	1	1	1	5	5	4	3	0	1	2	1	1	1	5	5	4	3	0	1	2	1	1	1	5	5	4	3	27.2	27.2	27.2	32.886	298	298;274;297;154;171;188;101	5
Q8BG05;A2AL12;A2AL13;V9GX38	Q8BG05;A2AL12	4;4;1;1	4;4;1;1	4;4;1;1	Heterogeneous nuclear ribonucleoprotein A3	Hnrnpa3	sp|Q8BG05|ROA3_MOUSE Heterogeneous nuclear ribonucleoprotein A3 OS=Mus musculus OX=10090 GN=Hnrnpa3 PE=1 SV=1;tr|A2AL12|A2AL12_MOUSE Heterogeneous nuclear ribonucleoprotein A3 OS=Mus musculus OX=10090 GN=Hnrnpa3 PE=1 SV=1	4	4	4	4	0	1	2	2	0	0	1	1	0	3	0	1	2	2	0	0	1	1	0	3	0	1	2	2	0	0	1	1	0	3	16.1	16.1	16.1	39.652	379	379;318;194;357	4
Q0VF55;Q8C048;A2ALL9	Q0VF55;Q8C048;A2ALL9	18;18;18	8;8;8	8;8;8	Calcium-transporting ATPase	Atp2b3	tr|Q0VF55|Q0VF55_MOUSE Calcium-transporting ATPase OS=Mus musculus OX=10090 GN=Atp2b3 PE=1 SV=1;tr|Q8C048|Q8C048_MOUSE Calcium-transporting ATPase OS=Mus musculus OX=10090 GN=Atp2b3 PE=1 SV=1;tr|A2ALL9|A2ALL9_MOUSE Calcium-transporting ATPase OS=Mus muscul	3	18	8	8	1	3	9	3	1	2	14	14	4	11	0	1	3	0	0	0	7	6	1	4	0	1	3	0	0	0	7	6	1	4	19.3	11.4	11.4	134.36	1220	1220;1144;1173	1.04	24
Q62420;A2ALV3;A2ALV1;Q8BXU5;Q62419;F6ZL13;A0A3B2W7K0	Q62420;A2ALV3;A2ALV1;Q8BXU5	3;3;2;2;1;1;1	3;3;2;2;1;1;1	3;3;2;2;1;1;1	Endophilin-A1	Sh3gl2	sp|Q62420|SH3G2_MOUSE Endophilin-A1 OS=Mus musculus OX=10090 GN=Sh3gl2 PE=1 SV=2;tr|A2ALV3|A2ALV3_MOUSE Endophilin-A1 OS=Mus musculus OX=10090 GN=Sh3gl2 PE=1 SV=1;tr|A2ALV1|A2ALV1_MOUSE Endophilin-A1 OS=Mus musculus OX=10090 GN=Sh3gl2 PE=1 SV=1;tr|Q8BXU5|Q	7	3	3	3	0	0	0	0	0	0	0	3	1	2	0	0	0	0	0	0	0	3	1	2	0	0	0	0	0	0	0	3	1	2	12.5	12.5	12.5	39.955	352	352;431;182;245;368;231;247	4
Q60737;Q6NSS6;A2ANR6	Q60737;Q6NSS6;A2ANR6	2;2;2	2;2;2	2;2;2	Casein kinase II subunit alpha	Csnk2a1	sp|Q60737|CSK21_MOUSE Casein kinase II subunit alpha OS=Mus musculus OX=10090 GN=Csnk2a1 PE=1 SV=2;tr|Q6NSS6|Q6NSS6_MOUSE Casein kinase II subunit alpha (Fragment) OS=Mus musculus OX=10090 GN=Csnk2a1 PE=1 SV=1;tr|A2ANR6|A2ANR6_MOUSE Casein kinase II subuni	3	2	2	2	0	0	0	0	0	0	0	2	2	1	0	0	0	0	0	0	0	2	2	1	0	0	0	0	0	0	0	2	2	1	3.3	3.3	3.3	45.133	391	391;77;131	3.2
Q64521;A2AQR0	Q64521;A2AQR0	34;34	34;34	34;34	Glycerol-3-phosphate dehydrogenase, mitochondrial;Glycerol-3-phosphate dehydrogenase	Gpd2	sp|Q64521|GPDM_MOUSE Glycerol-3-phosphate dehydrogenase, mitochondrial OS=Mus musculus OX=10090 GN=Gpd2 PE=1 SV=2;tr|A2AQR0|A2AQR0_MOUSE Glycerol-3-phosphate dehydrogenase OS=Mus musculus OX=10090 GN=Gpd2 PE=1 SV=1	2	34	34	34	0	0	33	4	24	13	5	7	2	4	0	0	33	4	24	13	5	7	2	4	0	0	33	4	24	13	5	7	2	4	63.3	63.3	63.3	80.953	727	727;745	2.14	3
Q8C0L0;A2ARI0	Q8C0L0;A2ARI0	4;4	4;4	4;4	Thioredoxin-related transmembrane protein 4	Tmx4	sp|Q8C0L0|TMX4_MOUSE Thioredoxin-related transmembrane protein 4 OS=Mus musculus OX=10090 GN=Tmx4 PE=1 SV=2;tr|A2ARI0|A2ARI0_MOUSE Thioredoxin-related transmembrane protein 4 OS=Mus musculus OX=10090 GN=Tmx4 PE=1 SV=1	2	4	4	4	0	0	0	0	0	0	3	3	1	0	0	0	0	0	0	0	3	3	1	0	0	0	0	0	0	0	3	3	1	0	12.5	12.5	12.5	37.131	335	335;183	3.5
Q9QYR6;A2ARP8	Q9QYR6;A2ARP8	13;13	13;13	12;12	Microtubule-associated protein 1A;MAP1A heavy chain;MAP1 light chain LC2	Map1a	sp|Q9QYR6|MAP1A_MOUSE Microtubule-associated protein 1A OS=Mus musculus OX=10090 GN=Map1a PE=1 SV=2;tr|A2ARP8|A2ARP8_MOUSE Microtubule-associated protein 1A OS=Mus musculus OX=10090 GN=Map1a PE=1 SV=1	2	13	13	12	2	1	11	0	0	0	2	2	3	7	2	1	11	0	0	0	2	2	3	7	2	1	10	0	0	0	2	1	2	7	7.3	7.3	7	300.14	2776	2776;3014	1.45	25
A2ARS0	A2ARS0	2	2	2	Ankyrin repeat domain-containing protein 63	Ankrd63	sp|A2ARS0|ANR63_MOUSE Ankyrin repeat domain-containing protein 63 OS=Mus musculus OX=10090 GN=Ankrd63 PE=1 SV=1	1	2	2	2	0	0	0	0	0	0	1	0	2	2	0	0	0	0	0	0	1	0	2	2	0	0	0	0	0	0	1	0	2	2	5.1	5.1	5.1	41.067	390	390	4
A2ARZ3	A2ARZ3	1	1	1	Fibrous sheath-interacting protein 2	Fsip2	sp|A2ARZ3|FSIP2_MOUSE Fibrous sheath-interacting protein 2 OS=Mus musculus OX=10090 GN=Fsip2 PE=1 SV=3	1	1	1	1	0	0	0	0	0	0	1	1	0	0	0	0	0	0	0	0	1	1	0	0	0	0	0	0	0	0	1	1	0	0	0.3	0.3	0.3	784.85	6995	6995	3.33
P28660;A2AS98	P28660;A2AS98	8;8	8;8	8;8	Nck-associated protein 1	Nckap1	sp|P28660|NCKP1_MOUSE Nck-associated protein 1 OS=Mus musculus OX=10090 GN=Nckap1 PE=1 SV=2;tr|A2AS98|A2AS98_MOUSE Nck-associated protein 1 OS=Mus musculus OX=10090 GN=Nckap1 PE=1 SV=1	2	8	8	8	0	0	2	7	0	0	0	1	0	0	0	0	2	7	0	0	0	1	0	0	0	0	2	7	0	0	0	1	0	0	8.6	8.6	8.6	128.78	1128	1128;1134	1.09	10
Q9CYZ2;A2AUD5;Q3TUJ9;F6VQ81;Q8BKP1;Q3TAI4;V9GWU5	Q9CYZ2;A2AUD5;Q3TUJ9;F6VQ81;Q8BKP1;Q3TAI4;V9GWU5	4;4;4;4;4;4;3	4;4;4;4;4;4;3	4;4;4;4;4;4;3	Tumor protein D54	Tpd52l2	sp|Q9CYZ2|TPD54_MOUSE Tumor protein D54 OS=Mus musculus OX=10090 GN=Tpd52l2 PE=1 SV=1;tr|A2AUD5|A2AUD5_MOUSE Tumor protein D54 OS=Mus musculus OX=10090 GN=Tpd52l2 PE=1 SV=1;tr|Q3TUJ9|Q3TUJ9_MOUSE Tumor protein D54 OS=Mus musculus OX=10090 GN=Tpd52l2 PE=1 S	7	4	4	4	0	0	4	0	0	0	0	0	0	0	0	0	4	0	0	0	0	0	0	0	0	0	4	0	0	0	0	0	0	0	26.8	26.8	26.8	24.043	220	220;229;186;161;200;206;169	4.71
P60904;A2AUE1;G5E8T0	P60904;A2AUE1;G5E8T0	1;1;1	1;1;1	1;1;1	DnaJ homolog subfamily C member 5	Dnajc5	sp|P60904|DNJC5_MOUSE DnaJ homolog subfamily C member 5 OS=Mus musculus OX=10090 GN=Dnajc5 PE=1 SV=1;tr|A2AUE1|A2AUE1_MOUSE DnaJ homolog subfamily C member 5 (Fragment) OS=Mus musculus OX=10090 GN=Dnajc5 PE=1 SV=1;tr|G5E8T0|G5E8T0_MOUSE DnaJ homolog subfam	3	1	1	1	0	0	0	0	0	0	1	1	0	1	0	0	0	0	0	0	1	1	0	1	0	0	0	0	0	0	1	1	0	1	8.6	8.6	8.6	22.101	198	198;141;167	4.75
P70175;A2BEF2;Q52KF7;A2BEE9	P70175;A2BEF2;Q52KF7;A2BEE9	2;2;2;2	2;2;2;2	2;2;2;2	Disks large homolog 3	Dlg3	sp|P70175|DLG3_MOUSE Disks large homolog 3 OS=Mus musculus OX=10090 GN=Dlg3 PE=1 SV=1;tr|A2BEF2|A2BEF2_MOUSE Disks large homolog 3 OS=Mus musculus OX=10090 GN=Dlg3 PE=1 SV=1;tr|Q52KF7|Q52KF7_MOUSE Disks large homolog 3 OS=Mus musculus OX=10090 GN=Dlg3 PE=1	4	2	2	2	0	0	0	0	0	0	1	2	0	0	0	0	0	0	0	0	1	2	0	0	0	0	0	0	0	0	1	2	0	0	3.4	3.4	3.4	93.481	849	849;512;817;835	2
A2RSJ4;Q8C318	A2RSJ4;Q8C318	7;4	7;4	7;4	UHRF1-binding protein 1-like	Uhrf1bp1l	sp|A2RSJ4|UH1BL_MOUSE UHRF1-binding protein 1-like OS=Mus musculus OX=10090 GN=Uhrf1bp1l PE=1 SV=2;tr|Q8C318|Q8C318_MOUSE UHRF1-binding protein 1-like (Fragment) OS=Mus musculus OX=10090 GN=Uhrf1bp1l PE=1 SV=1	2	7	7	7	0	0	7	0	0	0	0	0	0	0	0	0	7	0	0	0	0	0	0	0	0	0	7	0	0	0	0	0	0	0	6.7	6.7	6.7	161.94	1457	1457;590	1.27	8
A3KGE4;G3X9Q7;Q8R357;O88998	A3KGE4;G3X9Q7;Q8R357;O88998	4;4;4;4	4;4;4;4	4;4;4;4	Noelin	Olfm1	tr|A3KGE4|A3KGE4_MOUSE Noelin OS=Mus musculus OX=10090 GN=Olfm1 PE=1 SV=1;tr|G3X9Q7|G3X9Q7_MOUSE Noelin OS=Mus musculus OX=10090 GN=Olfm1 PE=1 SV=1;tr|Q8R357|Q8R357_MOUSE Noelin OS=Mus musculus OX=10090 GN=Olfm1 PE=1 SV=1;sp|O88998|NOE1_MOUSE Noelin OS=Mus	4	4	4	4	0	1	0	0	0	0	1	3	1	4	0	1	0	0	0	0	1	3	1	4	0	1	0	0	0	0	1	3	1	4	9.5	9.5	9.5	51.027	442	442;457;485;485	2.07	2
E9Q447;A3KGU5;A3KGU7;A3KGU9;P16546;A3KGU4	E9Q447;A3KGU5;A3KGU7;A3KGU9;P16546	38;38;38;38;37;1	38;38;38;38;37;1	38;38;38;38;37;1	Spectrin alpha chain, non-erythrocytic 1	Sptan1	tr|E9Q447|E9Q447_MOUSE Spectrin alpha chain, non-erythrocytic 1 OS=Mus musculus OX=10090 GN=Sptan1 PE=1 SV=1;tr|A3KGU5|A3KGU5_MOUSE Spectrin alpha chain, non-erythrocytic 1 OS=Mus musculus OX=10090 GN=Sptan1 PE=1 SV=1;tr|A3KGU7|A3KGU7_MOUSE Spectrin alpha	6	38	38	38	3	8	7	3	2	1	5	19	15	19	3	8	7	3	2	1	5	19	15	19	3	8	7	3	2	1	5	19	15	19	20.1	20.1	20.1	285.34	2478	2478;2457;2477;2498;2472;219	1	82
Q7M6W1;A3QM89	Q7M6W1;A3QM89	1;1	1;1	1;1	Reticulon	Rtn1	tr|Q7M6W1|Q7M6W1_MOUSE Reticulon OS=Mus musculus OX=10090 GN=Rtn1 PE=1 SV=1;tr|A3QM89|A3QM89_MOUSE Reticulon (Fragment) OS=Mus musculus OX=10090 GN=Rtn1 PE=1 SV=1	2	1	1	1	0	0	0	0	0	0	1	1	0	0	0	0	0	0	0	0	1	1	0	0	0	0	0	0	0	0	1	1	0	0	4.8	4.8	4.8	23.557	208	208;253	5
Q9CWU6;A6PWX7;F6V305;A6PWX9	Q9CWU6;A6PWX7;F6V305;A6PWX9	1;1;1;1	1;1;1;1	1;1;1;1	Ubiquinol-cytochrome-c reductase complex assembly factor 1	Uqcc1	sp|Q9CWU6|UQCC1_MOUSE Ubiquinol-cytochrome-c reductase complex assembly factor 1 OS=Mus musculus OX=10090 GN=Uqcc1 PE=1 SV=1;tr|A6PWX7|A6PWX7_MOUSE Ubiquinol-cytochrome-c reductase complex assembly factor 1 OS=Mus musculus OX=10090 GN=Uqcc1 PE=1 SV=1;tr|F6	4	1	1	1	0	0	0	0	0	0	0	0	1	0	0	0	0	0	0	0	0	0	1	0	0	0	0	0	0	0	0	0	1	0	3.1	3.1	3.1	34.299	295	295;227;243;269	5
A8DUK4;E9Q223	A8DUK4;E9Q223	5;4	5;4	2;1		Hbbt1;Hbb-bs	tr|A8DUK4|A8DUK4_MOUSE Beta-globin OS=Mus musculus OX=10090 GN=Hbb-bs PE=1 SV=1;tr|E9Q223|E9Q223_MOUSE Hemoglobin, beta adult s chain (Fragment) OS=Mus musculus OX=10090 GN=Hbb-bs PE=1 SV=1	2	5	5	2	1	2	0	1	1	0	4	5	3	2	1	2	0	1	1	0	4	5	3	2	1	1	0	1	1	0	2	2	1	1	47.6	47.6	17	15.748	147	147;103	4.7
B0QZN5;P63044;P63024	B0QZN5;P63044;P63024	3;3;2	3;3;2	3;3;2	Vesicle-associated membrane protein 2;Vesicle-associated membrane protein 3	Vamp2;Vamp3	tr|B0QZN5|B0QZN5_MOUSE Synaptobrevin-2 OS=Mus musculus OX=10090 GN=Vamp2 PE=1 SV=1;sp|P63044|VAMP2_MOUSE Vesicle-associated membrane protein 2 OS=Mus musculus OX=10090 GN=Vamp2 PE=1 SV=2;sp|P63024|VAMP3_MOUSE Vesicle-associated membrane protein 3 OS=Mus mu	3	3	3	3	0	1	0	0	0	0	3	3	2	1	0	1	0	0	0	0	3	3	2	1	0	1	0	0	0	0	3	3	2	1	24.5	24.5	24.5	17.862	163	163;116;103	5
B0V2N1;A2A8L5;F6Y3V0;F6S1X8;A0A286YDS2;A0A286YDF6	B0V2N1	11;2;2;2;1;1	11;2;2;2;1;1	6;0;0;0;1;1	Receptor-type tyrosine-protein phosphatase S	Ptprs	sp|B0V2N1|PTPRS_MOUSE Receptor-type tyrosine-protein phosphatase S OS=Mus musculus OX=10090 GN=Ptprs PE=1 SV=1	6	11	11	6	0	0	0	0	0	0	9	11	1	2	0	0	0	0	0	0	9	11	1	2	0	0	0	0	0	0	5	6	1	2	9.6	9.6	5.7	211.9	1907	1907;1898;1291;1332;208;448	1.96	1
Q8BPN8;B0V2P5;F6RYL8;B0V2P6;Q6PNC0;F8WGX5	Q8BPN8;B0V2P5;F6RYL8	22;22;16;9;1;1	22;22;16;9;1;1	22;22;16;9;1;1	DmX-like protein 2	Dmxl2	sp|Q8BPN8|DMXL2_MOUSE DmX-like protein 2 OS=Mus musculus OX=10090 GN=Dmxl2 PE=1 SV=3;tr|B0V2P5|B0V2P5_MOUSE DmX-like protein 2 OS=Mus musculus OX=10090 GN=Dmxl2 PE=1 SV=1;tr|F6RYL8|F6RYL8_MOUSE DmX-like protein 2 (Fragment) OS=Mus musculus OX=10090 GN=Dmxl	6	22	22	22	0	0	22	2	0	0	1	0	0	2	0	0	22	2	0	0	1	0	0	2	0	0	22	2	0	0	1	0	0	2	9.4	9.4	9.4	338.2	3032	3032;3054;2235;1310;3013;3025	1	28
B1AR51	B1AR51	1	1	1		Dnah9	tr|B1AR51|B1AR51_MOUSE Dynein, axonemal, heavy chain 9 OS=Mus musculus OX=10090 GN=Dnah9 PE=1 SV=1	1	1	1	1	0	0	0	0	0	0	0	0	1	0	0	0	0	0	0	0	0	0	1	0	0	0	0	0	0	0	0	0	1	0	0.2	0.2	0.2	512.36	4484	4484	3
P40124;B1ARS0	P40124;B1ARS0	1;1	1;1	1;1	Adenylyl cyclase-associated protein 1;Adenylyl cyclase-associated protein	Cap1	sp|P40124|CAP1_MOUSE Adenylyl cyclase-associated protein 1 OS=Mus musculus OX=10090 GN=Cap1 PE=1 SV=4;tr|B1ARS0|B1ARS0_MOUSE Adenylyl cyclase-associated protein 1 (Fragment) OS=Mus musculus OX=10090 GN=Cap1 PE=1 SV=1	2	1	1	1	0	0	0	0	0	0	0	1	0	1	0	0	0	0	0	0	0	1	0	1	0	0	0	0	0	0	0	1	0	1	2.1	2.1	2.1	51.564	474	474;164	3
Q9DCX2;B1ASE2	Q9DCX2;B1ASE2	2;2	2;2	2;2	ATP synthase subunit d, mitochondrial	Atp5h	sp|Q9DCX2|ATP5H_MOUSE ATP synthase subunit d, mitochondrial OS=Mus musculus OX=10090 GN=Atp5pd PE=1 SV=3;tr|B1ASE2|B1ASE2_MOUSE ATP synthase subunit d, mitochondrial (Fragment) OS=Mus musculus OX=10090 GN=Atp5h PE=1 SV=1	2	2	2	2	0	0	1	0	0	0	0	2	0	1	0	0	1	0	0	0	0	2	0	1	0	0	1	0	0	0	0	2	0	1	23.6	23.6	23.6	18.749	161	161;138	5
Q400C8;B1AT60;B1AT59	Q400C8;B1AT60;B1AT59	3;3;3	3;3;3	3;3;3	Archaemetzincin-2	Amz2	sp|Q400C8|AMZ2_MOUSE Archaemetzincin-2 OS=Mus musculus OX=10090 GN=Amz2 PE=2 SV=1;tr|B1AT60|B1AT60_MOUSE Archaemetzincin-2 OS=Mus musculus OX=10090 GN=Amz2 PE=1 SV=2;tr|B1AT59|B1AT59_MOUSE Archaemetzincin-2 OS=Mus musculus OX=10090 GN=Amz2 PE=1 SV=1	3	3	3	3	2	3	0	0	0	0	0	1	1	0	2	3	0	0	0	0	0	1	1	0	2	3	0	0	0	0	0	1	1	0	8.4	8.4	8.4	41.341	359	359;322;363	4
Q80Y81;B1ATP7	Q80Y81;B1ATP7	1;1	1;1	1;1	Zinc phosphodiesterase ELAC protein 2	Elac2	sp|Q80Y81|RNZ2_MOUSE Zinc phosphodiesterase ELAC protein 2 OS=Mus musculus OX=10090 GN=Elac2 PE=1 SV=1;tr|B1ATP7|B1ATP7_MOUSE ElaC homolog protein 2 OS=Mus musculus OX=10090 GN=Elac2 PE=1 SV=1	2	1	1	1	0	0	0	0	0	0	0	0	1	1	0	0	0	0	0	0	0	0	1	1	0	0	0	0	0	0	0	0	1	1	1.1	1.1	1.1	92.718	831	831;823	3.33	1
B1AXV0	B1AXV0	2	2	2	DOMON domain-containing protein FRRS1L	Frrs1l	sp|B1AXV0|FRS1L_MOUSE DOMON domain-containing protein FRRS1L OS=Mus musculus OX=10090 GN=Frrs1l PE=1 SV=1	1	2	2	2	0	0	0	0	0	0	1	2	0	0	0	0	0	0	0	0	1	2	0	0	0	0	0	0	0	0	1	2	0	0	7.2	7.2	7.2	32.506	293	293	4.75
P35700;B1AXW5;B1AXW6;O08807;B1AXW4;B1AZS9	P35700;B1AXW5;B1AXW6;O08807;B1AXW4;B1AZS9	2;2;2;1;1;1	2;2;2;1;1;1	2;2;2;1;1;1	Peroxiredoxin-1;Peroxiredoxin-4	Prdx1;Prdx4	sp|P35700|PRDX1_MOUSE Peroxiredoxin-1 OS=Mus musculus OX=10090 GN=Prdx1 PE=1 SV=1;tr|B1AXW5|B1AXW5_MOUSE Peroxiredoxin-1 (Fragment) OS=Mus musculus OX=10090 GN=Prdx1 PE=1 SV=8;tr|B1AXW6|B1AXW6_MOUSE Peroxiredoxin-1 (Fragment) OS=Mus musculus OX=10090 GN=Pr	6	2	2	2	0	1	0	0	0	0	0	2	0	1	0	1	0	0	0	0	0	2	0	1	0	1	0	0	0	0	0	2	0	1	9	9	9	22.176	199	199;169;176;274;123;229	5
Q80TZ3;B1B0B7	Q80TZ3;B1B0B7	2;2	2;2	2;2	Putative tyrosine-protein phosphatase auxilin	Dnajc6	sp|Q80TZ3|AUXI_MOUSE Putative tyrosine-protein phosphatase auxilin OS=Mus musculus OX=10090 GN=Dnajc6 PE=1 SV=2;tr|B1B0B7|B1B0B7_MOUSE Putative tyrosine-protein phosphatase auxilin (Fragment) OS=Mus musculus OX=10090 GN=Dnajc6 PE=1 SV=2	2	2	2	2	0	0	0	0	0	0	2	1	1	1	0	0	0	0	0	0	2	1	1	1	0	0	0	0	0	0	2	1	1	1	2.5	2.5	2.5	102.3	938	938;514	2
Q8R570;B2FDF6;I7HPB1;I7HFU4	Q8R570;B2FDF6;I7HPB1;I7HFU4	2;2;1;1	2;2;1;1	2;2;1;1	Synaptosomal-associated protein 47	Snap47	sp|Q8R570|SNP47_MOUSE Synaptosomal-associated protein 47 OS=Mus musculus OX=10090 GN=Snap47 PE=1 SV=1;tr|B2FDF6|B2FDF6_MOUSE Synaptosomal-associated protein 47 OS=Mus musculus OX=10090 GN=Snap47 PE=1 SV=1;tr|I7HPB1|I7HPB1_MOUSE Synaptosomal-associated prot	4	2	2	2	0	0	0	0	0	0	2	0	0	0	0	0	0	0	0	0	2	0	0	0	0	0	0	0	0	0	2	0	0	0	6.1	6.1	6.1	46.524	413	413;329;181;183	4
P23336;B2FDI6;Q91W00;Q8C2H7;Q9DBU1	P23336;B2FDI6;Q91W00;Q8C2H7;Q9DBU1	1;1;1;1;1	1;1;1;1;1	1;1;1;1;1	N-acetyllactosaminide alpha-1,3-galactosyltransferase	Ggta1	sp|P23336|GGTA1_MOUSE N-acetyllactosaminide alpha-1,3-galactosyltransferase OS=Mus musculus OX=10090 GN=Ggta1 PE=2 SV=1;tr|B2FDI6|B2FDI6_MOUSE N-acetyllactosaminide alpha-1,3-galactosyltransferase (Fragment) OS=Mus musculus OX=10090 GN=Ggta1 PE=1 SV=1;tr|Q	5	1	1	1	0	0	1	0	0	1	0	0	0	0	0	0	1	0	0	1	0	0	0	0	0	0	1	0	0	1	0	0	0	0	3	3	3	46.475	394	394;141;372;384;406	1.5	1
O89112;B2KGR2	O89112;B2KGR2	1;1	1;1	1;1	LanC-like protein 1	Lancl1	sp|O89112|LANC1_MOUSE Glutathione S-transferase LANCL1 OS=Mus musculus OX=10090 GN=Lancl1 PE=1 SV=1;tr|B2KGR2|B2KGR2_MOUSE Glutathione S-transferase LANCL1 (Fragment) OS=Mus musculus OX=10090 GN=Lancl1 PE=1 SV=1	2	1	1	1	0	0	1	0	0	0	1	1	1	1	0	0	1	0	0	0	1	1	1	1	0	0	1	0	0	0	1	1	1	1	3	3	3	45.341	399	399;173	4
P61979;H3BLL4;B2M1R6	P61979;H3BLL4;B2M1R6	1;1;1	1;1;1	1;1;1	Heterogeneous nuclear ribonucleoprotein K	Hnrnpk	sp|P61979|HNRPK_MOUSE Heterogeneous nuclear ribonucleoprotein K OS=Mus musculus OX=10090 GN=Hnrnpk PE=1 SV=1;tr|H3BLL4|H3BLL4_MOUSE Heterogeneous nuclear ribonucleoprotein K OS=Mus musculus OX=10090 GN=Hnrnpk PE=1 SV=1;tr|B2M1R6|B2M1R6_MOUSE Heterogeneous	3	1	1	1	0	0	0	0	0	0	0	1	0	0	0	0	0	0	0	0	0	1	0	0	0	0	0	0	0	0	0	1	0	0	5	5	5	50.976	463	463;394;440	2
B2RSH2	B2RSH2	6	4	4	Guanine nucleotide-binding protein G(i) subunit alpha-1	Gnai1	sp|B2RSH2|GNAI1_MOUSE Guanine nucleotide-binding protein G(i) subunit alpha-1 OS=Mus musculus OX=10090 GN=Gnai1 PE=1 SV=1	1	6	4	4	1	0	2	1	1	1	5	5	3	3	0	0	0	0	0	0	3	3	1	1	0	0	0	0	0	0	3	3	1	1	22.9	16.4	16.4	40.361	354	354	4
Q80TH2;B2RUJ2;B7ZNX6	Q80TH2;B2RUJ2;B7ZNX6	1;1;1	1;1;1	1;1;1	Protein LAP2	Erbb2ip	sp|Q80TH2|ERBIN_MOUSE Erbin OS=Mus musculus OX=10090 GN=Erbin PE=1 SV=3;tr|B2RUJ2|B2RUJ2_MOUSE Erbb2ip protein OS=Mus musculus OX=10090 GN=Erbin PE=1 SV=1;tr|B7ZNX6|B7ZNX6_MOUSE Erbb2ip protein OS=Mus musculus OX=10090 GN=Erbin PE=1 SV=1	3	1	1	1	0	0	0	0	0	1	0	0	0	0	0	0	0	0	0	1	0	0	0	0	0	0	0	0	0	1	0	0	0	0	0.8	0.8	0.8	157.25	1402	1402;1294;1411	5
B2RXT3;E9Q7L0	B2RXT3;E9Q7L0	17;16	13;12	13;12		Ogdhl	tr|B2RXT3|B2RXT3_MOUSE Ogdhl protein OS=Mus musculus OX=10090 GN=Ogdhl PE=1 SV=1;tr|E9Q7L0|E9Q7L0_MOUSE Oxoglutarate dehydrogenase-like OS=Mus musculus OX=10090 GN=Ogdhl PE=1 SV=1	2	17	13	13	5	2	9	0	10	5	6	5	8	8	2	1	5	0	7	1	4	2	6	6	2	1	5	0	7	1	4	2	6	6	21.1	17	17	114.56	1010	1010;1029	2.03
B9EJR8;B2RY24	B9EJR8;B2RY24	1;1	1;1	1;1	Dynein assembly factor 5, axonemal	Dnaaf5	sp|B9EJR8|DAAF5_MOUSE Dynein assembly factor 5, axonemal OS=Mus musculus OX=10090 GN=Dnaaf5 PE=1 SV=1;tr|B2RY24|B2RY24_MOUSE Dynein assembly factor 5, axonemal OS=Mus musculus OX=10090 GN=Dnaaf5 PE=1 SV=1	2	1	1	1	0	0	0	0	0	0	0	0	0	1	0	0	0	0	0	0	0	0	0	1	0	0	0	0	0	0	0	0	0	1	1.3	1.3	1.3	93.85	853	853;558	2
CON__ENSEMBL:ENSBTAP00000001528;D3Z6P4	CON__ENSEMBL:ENSBTAP00000001528	10;1	1;0	1;0				2	10	1	1	0	0	0	9	0	0	0	0	0	1	0	0	0	0	0	0	0	0	0	1	0	0	0	0	0	0	0	0	0	1	9.7	0.6	0.6	137.98	1222	1222;359	3
CON__ENSEMBL:ENSBTAP00000007350;CON__P01030;P01029	CON__ENSEMBL:ENSBTAP00000007350;CON__P01030;P01029	4;3;2	4;3;2	4;3;2	Complement C4-B;Complement C4 beta chain;Complement C4 alpha chain;C4a anaphylatoxin;Complement C4 gamma chain	C4b	;;sp|P01029|CO4B_MOUSE Complement C4-B OS=Mus musculus OX=10090 GN=C4b PE=1 SV=3	3	4	4	4	0	0	2	1	3	3	0	0	0	1	0	0	2	1	3	3	0	0	0	1	0	0	2	1	3	3	0	0	0	1	2.7	2.7	2.7	192.99	1742	1742;1741;1738	1.58	6
CON__ENSEMBL:ENSBTAP00000014147	CON__ENSEMBL:ENSBTAP00000014147	1	1	1				1	1	1	1	0	1	0	1	0	0	0	0	0	0	0	1	0	1	0	0	0	0	0	0	0	1	0	1	0	0	0	0	0	0	13.3	13.3	13.3	11.756	113	113	5
CON__ENSEMBL:ENSBTAP00000024462;CON__ENSEMBL:ENSBTAP00000024466	CON__ENSEMBL:ENSBTAP00000024462;CON__ENSEMBL:ENSBTAP00000024466	5;3	5;3	5;3			;	2	5	5	5	3	4	0	0	0	0	1	0	3	1	3	4	0	0	0	0	1	0	3	1	3	4	0	0	0	0	1	0	3	1	16.2	16.2	16.2	46.543	419	419;401	2.47	4
CON__ENSEMBL:ENSP00000377550	CON__ENSEMBL:ENSP00000377550	11	4	0				1	11	4	0	6	8	1	4	2	1	5	3	4	3	2	3	0	1	0	0	0	0	0	1	0	0	0	0	0	0	0	0	0	0	21.7	9.8	0	45.771	420	420	2	5
CON__O43790;CON__Q14533;CON__Q6NT21;Q9Z2T6;CON__P78385;Q9ERE2;P97861;E9Q1Y9;Q6IMF0;CON__Q61726;CON__P78386;Q9CPR6	CON__O43790;CON__Q14533;CON__Q6NT21;Q9Z2T6;CON__P78385;Q9ERE2;P97861;E9Q1Y9;Q6IMF0;CON__Q61726;CON__P78386	6;6;5;4;4;3;3;3;3;3;3;1	6;6;5;4;4;3;3;3;3;3;3;1	6;6;5;4;4;3;3;3;3;3;3;1	Keratin, type II cuticular Hb5;Keratin, type II cuticular Hb1;Keratin, type II cuticular Hb6;Keratin, type II cuticular Hb3	Krt85;Krt81;Krt86;5430421N21Rik;Krt83	;;;sp|Q9Z2T6|KRT85_MOUSE Keratin, type II cuticular Hb5 OS=Mus musculus OX=10090 GN=Krt85 PE=1 SV=2;;sp|Q9ERE2|KRT81_MOUSE Keratin, type II cuticular Hb1 OS=Mus musculus OX=10090 GN=Krt81 PE=2 SV=2;sp|P97861|KRT86_MOUSE Keratin, type II cuticular Hb6 OS=Mu	12	6	6	6	1	6	0	0	0	0	0	1	0	0	1	6	0	0	0	0	0	1	0	0	1	6	0	0	0	0	0	1	0	0	10.7	10.7	10.7	53.5	486	486;505;493;507;493;481;486;479;495;479;507;171	2.25	7
CON__P00711	CON__P00711	1	1	1				1	1	1	1	0	0	1	0	0	0	0	0	0	0	0	0	1	0	0	0	0	0	0	0	0	0	1	0	0	0	0	0	0	0	8.1	8.1	8.1	14.186	123	123	4
CON__P00761	CON__P00761	6	6	6				1	6	6	6	2	6	4	3	3	4	3	6	5	6	2	6	4	3	3	4	3	6	5	6	2	6	4	3	3	4	3	6	5	6	26.8	26.8	26.8	24.409	231	231	2.84	47
CON__P02533;Q61414;CON__A2A4G1;B1AQ77;Q9D312;CON__Q61782;CON__P35900;CON__Q9D312;CON__Q8N1A0;Q8CCX5	CON__P02533	25;6;6;6;2;2;2;2;1;1	16;0;0;0;0;0;0;0;0;0	2;0;0;0;0;0;0;0;0;0				10	25	16	2	15	11	4	8	4	1	20	5	7	7	11	6	2	5	2	0	14	2	3	4	2	1	0	1	1	0	1	0	0	0	46.8	32	6.1	51.621	472	472;452;456;456;431;93;424;431;295;294	2.98	23
CON__P02538;CON__O95678;Q8VED5;CON__Q8VED5;P11679;CON__P05787;CON__H-INV:HIT000292931	CON__P02538	32;8;7;7;5;5;2	2;0;0;0;0;0;0	2;0;0;0;0;0;0				7	32	2	2	18	18	5	7	3	3	29	11	10	17	1	0	0	0	0	0	2	0	0	0	1	0	0	0	0	0	2	0	0	0	46.8	3.5	3.5	60.044	564	564;551;531;531;490;483;443	2.33	3
CON__P02662	CON__P02662	5	5	5				1	5	5	5	5	5	4	4	4	3	5	5	5	5	5	5	4	4	4	3	5	5	5	5	5	5	4	4	4	3	5	5	5	5	33.7	33.7	33.7	22.975	199	199	2.97	43
CON__P02663	CON__P02663	6	6	6				1	6	6	6	3	3	3	2	3	1	2	2	3	3	3	3	3	2	3	1	2	2	3	3	3	3	3	2	3	1	2	2	3	3	31.4	31.4	31.4	24.348	207	207	3.18	14
CON__P02666	CON__P02666	2	2	2				1	2	2	2	2	2	1	1	1	1	2	1	2	2	2	2	1	1	1	1	2	1	2	2	2	2	1	1	1	1	2	1	2	2	12.9	12.9	12.9	23.583	209	209	3.16	14
CON__P02668	CON__P02668	3	3	3				1	3	3	3	2	1	2	1	1	1	2	1	2	1	2	1	2	1	1	1	2	1	2	1	2	1	2	1	1	1	2	1	2	1	33.7	33.7	33.7	18.974	169	169	3.39	6
CON__P02754	CON__P02754	7	7	7				1	7	7	7	5	4	6	3	2	1	4	4	6	4	5	4	6	3	2	1	4	4	6	4	5	4	6	3	2	1	4	4	6	4	40.7	40.7	40.7	18.281	162	162	3.16	25
CON__P02768-1	CON__P02768-1	7	3	2				1	7	3	2	3	3	4	2	3	3	4	4	5	5	0	0	0	0	0	0	1	1	2	2	0	0	0	0	0	0	0	0	2	2	8.2	3.1	1.6	69.366	609	609	1.67	4
CON__P02769	CON__P02769	47	47	42				1	47	47	42	39	29	44	16	22	39	37	29	40	32	39	29	44	16	22	39	37	29	40	32	36	26	39	13	18	35	34	26	37	29	72	72	66.9	69.293	607	607	2.72	386
CON__P04264;CON__H-INV:HIT000016045;E9Q0F0	CON__P04264	41;2;2	41;2;2	26;0;0				3	41	41	26	33	32	14	19	16	9	33	28	29	30	33	32	14	19	16	9	33	28	29	30	20	20	7	13	8	3	20	17	18	18	57.8	57.8	46.4	66.017	644	644;99;1068	2.93	207
CON__P08727	CON__P08727	9	1	1				1	9	1	1	6	5	1	2	2	1	6	3	2	3	0	1	0	0	0	0	0	0	0	0	0	1	0	0	0	0	0	0	0	0	19	2.2	2.2	44.091	400	400	1	1
CON__P08779;Q9Z2K1;CON__Q9Z2K1;CON__Q3ZAW8;Q9WTL4	CON__P08779	28;10;10;10;1	25;8;8;8;1	18;4;4;4;1				5	28	25	18	13	13	5	4	2	1	25	10	7	12	12	12	4	3	1	1	25	10	7	12	9	8	3	1	0	0	18	7	3	9	58.6	53.3	43.8	51.267	473	473;469;469;474;1300	3.07	35
CON__P13645;CON__Q7Z3Y7;CON__Q148H6;CON__Q2M2I5;CON__Q7Z3Z0;CON__Q7Z3Y8;CON__A2AB72;CON__Q99456;CON__O76014;CON__Q7Z3Y9;CON__O76013;CON__O76015;P05784;A6BLY7;CON__Q14532;CON__Q92764;CON__P05784;Q8VCW2;Q6IFX3;Q9Z320;B1AQ75;Q62168;B1ATJ5	CON__P13645	31;4;3;2;2;2;1;1;1;1;1;1;1;1;1;1;1;1;1;1;1;1;1	31;4;3;2;2;2;1;1;1;1;1;1;1;1;1;1;1;1;1;1;1;1;1	21;2;1;0;1;1;0;0;0;0;0;0;0;0;0;0;0;0;0;0;0;0;0				23	31	31	21	22	25	14	20	15	11	22	20	21	20	22	25	14	20	15	11	22	20	21	20	14	17	9	14	9	7	15	13	14	15	49.9	49.9	37.1	59.51	593	593;486;464;525;450;459;453;494;471;468;467;456;423;462;448;425;423;446;439;448;473;407;453	2.93	143
CON__P13647;CON__Q9H552	CON__P13647	27;2	15;0	5;0				2	27	15	5	20	17	6	11	7	4	25	14	14	22	11	8	1	7	5	1	14	7	8	12	5	4	1	2	1	1	5	3	3	4	37.5	22.9	7.8	62.378	590	590;499	3.03	44
CON__P19013	CON__P19013	10	8	4				1	10	8	4	8	6	1	1	0	1	2	1	1	6	7	4	0	0	0	0	1	0	0	4	4	3	0	0	0	0	0	0	0	3	18.7	17.2	8.9	63.91	594	594	2.84	6
CON__P35527	CON__P35527	35	35	35				1	35	35	35	27	27	18	28	18	15	28	25	28	26	27	27	18	28	18	15	28	25	28	26	27	27	18	28	18	15	28	25	28	26	53.8	53.8	53.8	62.129	623	623	2.96	215
CON__P35908;CON__Q01546;Q6IFZ9;Q9R0H5;CON__Q9R0H5;Q9DCV7;CON__Q9DCV7;CON__Q3KNV1;CON__P08729;CON__REFSEQ:XP_932229	CON__P35908	37;7;3;3;3;2;2;2;2;1	1;0;0;0;0;0;0;0;0;0	1;0;0;0;0;0;0;0;0;0				10	37	1	1	28	29	9	16	9	9	31	25	28	28	1	0	0	0	0	0	0	1	0	1	1	0	0	0	0	0	0	1	0	1	66.5	5.6	5.6	65.865	645	645;638;495;524;524;457;457;469;469;345	2.86	2
CON__P35908v2	CON__P35908v2	37	34	1				1	37	34	1	28	30	10	17	9	9	32	25	29	28	27	28	9	16	8	8	29	23	27	27	1	1	1	1	0	0	1	1	1	1	66.2	62.4	4.7	65.432	639	639	3.01	151
CON__P48668;CON__P04259	CON__P48668;CON__P04259	33;32	24;23	3;3			;	2	33	24	3	19	19	5	7	3	3	30	12	10	18	13	12	2	3	1	1	24	8	7	11	2	1	0	0	0	0	3	1	0	1	46.8	36.5	3.9	60.024	564	564;564	2.97	41
CON__Q04695;P19001;CON__P19001	CON__Q04695	20;5;5	11;1;1	4;1;1				3	20	11	4	7	7	1	4	2	1	18	5	4	8	2	1	0	0	0	0	11	2	1	4	0	0	0	0	0	0	4	1	0	0	44.9	29.9	11.6	48.105	432	432;403;403	3.42	5
CON__Q9UE12;CON__Q15323;CON__Q14525;Q61765;Q497I4;CON__Q6NTB9;CON__O76009;CON__A2A5Y0;CON__Q497I4;CON__REFSEQ:XP_986630;Q61897;CON__Q9D646;Q9D646;Q8K0Y2	CON__Q9UE12;CON__Q15323;CON__Q14525;Q61765;Q497I4;CON__Q6NTB9;CON__O76009;CON__A2A5Y0;CON__Q497I4;CON__REFSEQ:XP_986630;Q61897	4;4;3;2;2;2;2;2;2;2;2;1;1;1	3;3;2;1;1;2;2;1;1;1;1;1;1;1	3;3;2;1;1;2;2;1;1;1;1;1;1;1	Keratin, type I cuticular Ha1;Keratin, type I cuticular Ha5;Keratin, type I cuticular Ha3-II	Krt31;Krt35;Krt33b	;;;sp|Q61765|K1H1_MOUSE Keratin, type I cuticular Ha1 OS=Mus musculus OX=10090 GN=Krt31 PE=1 SV=2;sp|Q497I4|KRT35_MOUSE Keratin, type I cuticular Ha5 OS=Mus musculus OX=10090 GN=Krt35 PE=1 SV=1;;;;;;sp|Q61897|KT33B_MOUSE Keratin, type I cuticular Ha3-II OS	14	4	3	3	0	4	0	0	0	0	0	1	0	0	0	3	0	0	0	0	0	1	0	0	0	3	0	0	0	0	0	1	0	0	8.9	7.2	7.2	47.237	416	416;416;404;416;455;404;404;416;455;476;404;392;392;404	2.5	3
CON__Q1RMN8	CON__Q1RMN8	3	3	3				1	3	3	3	3	1	0	2	1	0	0	2	2	0	3	1	0	2	1	0	0	2	2	0	3	1	0	2	1	0	0	2	2	0	14.1	14.1	14.1	24.536	234	234	4.92
CON__Q2UVX4	CON__Q2UVX4	12	7	7				1	12	7	7	0	0	7	2	9	7	2	1	0	1	0	0	4	2	7	4	0	0	0	1	0	0	4	2	7	4	0	0	0	1	9.4	6.4	6.4	187.37	1662	1662	1.62	19
CON__Q32MB2;CON__Q7RTS7;Q6IME9;CON__Q14CN4-1;CON__Q6IME9;CON__Q3SY84	CON__Q32MB2;CON__Q7RTS7;Q6IME9;CON__Q14CN4-1;CON__Q6IME9;CON__Q3SY84	5;4;3;3;3;3	1;1;1;1;1;1	1;1;1;1;1;1	Keratin, type II cytoskeletal 72	Krt72	;;sp|Q6IME9|K2C72_MOUSE Keratin, type II cytoskeletal 72 OS=Mus musculus OX=10090 GN=Krt72 PE=3 SV=1;;;	6	5	1	1	4	4	1	2	1	1	4	2	2	4	1	1	0	1	1	0	1	1	1	1	1	1	0	1	1	0	1	1	1	1	7.8	2.2	2.2	58.923	540	540;529;520;511;520;523	2.76	10
CON__Q5D862	CON__Q5D862	1	1	1				1	1	1	1	0	0	0	1	0	0	0	0	0	0	0	0	0	1	0	0	0	0	0	0	0	0	0	1	0	0	0	0	0	0	2.1	2.1	2.1	248.07	2391	2391	4
Q6IFX2;CON__Q6IFX2	Q6IFX2;CON__Q6IFX2	16;16	1;1	0;0	Keratin, type I cytoskeletal 42	Krt42	sp|Q6IFX2|K1C42_MOUSE Keratin, type I cytoskeletal 42 OS=Mus musculus OX=10090 GN=Krt42 PE=1 SV=1;	2	16	1	0	9	8	2	5	2	1	13	3	4	5	1	0	0	0	0	0	0	0	0	0	0	0	0	0	0	0	0	0	0	0	28.1	1.8	0	50.133	452	452;452	3
CON__Q7Z794	CON__Q7Z794	9	6	4				1	9	6	4	8	4	2	2	1	2	4	3	3	5	6	1	0	0	0	0	1	1	1	2	4	1	0	0	0	0	1	0	0	1	15.1	11.4	7.3	61.802	578	578	2.88	7
CON__Q86YZ3	CON__Q86YZ3	8	8	8				1	8	8	8	1	0	0	8	0	0	0	1	0	2	1	0	0	8	0	0	0	1	0	2	1	0	0	8	0	0	0	1	0	2	14.5	14.5	14.5	282.39	2850	2850	3.94
D3Z649;D3Z592;D3YTU6	D3Z649;D3Z592;D3YTU6	4;4;4	4;4;4	4;4;4		Kcnt2	tr|D3Z649|D3Z649_MOUSE Potassium channel, subfamily T, member 2 OS=Mus musculus OX=10090 GN=Kcnt2 PE=1 SV=1;tr|D3Z592|D3Z592_MOUSE Potassium channel, subfamily T, member 2 OS=Mus musculus OX=10090 GN=Kcnt2 PE=1 SV=1;tr|D3YTU6|D3YTU6_MOUSE Potassium channel	3	4	4	4	0	0	0	0	0	0	4	0	0	0	0	0	0	0	0	0	4	0	0	0	0	0	0	0	0	0	4	0	0	0	4.1	4.1	4.1	130.35	1135	1135;1068;1111	1.6	2
Q91YT0;D3YUM1;D6RG60;A0A494BAS8;D3Z1U9	Q91YT0;D3YUM1;D6RG60;A0A494BAS8;D3Z1U9	2;2;1;1;1	2;2;1;1;1	2;2;1;1;1	NADH dehydrogenase [ubiquinone] flavoprotein 1, mitochondrial	Ndufv1	sp|Q91YT0|NDUV1_MOUSE NADH dehydrogenase [ubiquinone] flavoprotein 1, mitochondrial OS=Mus musculus OX=10090 GN=Ndufv1 PE=1 SV=1;tr|D3YUM1|D3YUM1_MOUSE NADH dehydrogenase [ubiquinone] flavoprotein 1, mitochondrial OS=Mus musculus OX=10090 GN=Ndufv1 PE=1 SV	5	2	2	2	0	0	0	0	0	0	0	2	0	1	0	0	0	0	0	0	0	2	0	1	0	0	0	0	0	0	0	2	0	1	4.5	4.5	4.5	50.834	464	464;455;120;128;385	3
Q9R1V6;D3YUP9;D3YUQ0	Q9R1V6;D3YUP9;D3YUQ0	4;4;2	4;4;2	4;4;2	Disintegrin and metalloproteinase domain-containing protein 22	Adam22	sp|Q9R1V6|ADA22_MOUSE Disintegrin and metalloproteinase domain-containing protein 22 OS=Mus musculus OX=10090 GN=Adam22 PE=1 SV=2;tr|D3YUP9|D3YUP9_MOUSE Disintegrin and metalloproteinase domain-containing protein 22 OS=Mus musculus OX=10090 GN=Adam22 PE=1	3	4	4	4	0	0	1	0	0	0	4	4	1	1	0	0	1	0	0	0	4	4	1	1	0	0	1	0	0	0	4	4	1	1	6.7	6.7	6.7	99.714	904	904;897;333	1.92	1
D3YWL1;D3YW33;P35276	D3YWL1;D3YW33;P35276	2;2;2	1;1;1	1;1;1	Ras-related protein Rab-3D	Rab3d	tr|D3YWL1|D3YWL1_MOUSE Ras-related protein Rab-3D (Fragment) OS=Mus musculus OX=10090 GN=Rab3d PE=1 SV=1;tr|D3YW33|D3YW33_MOUSE Ras-related protein Rab-3D OS=Mus musculus OX=10090 GN=Rab3d PE=1 SV=1;sp|P35276|RAB3D_MOUSE Ras-related protein Rab-3D OS=Mus m	3	2	1	1	1	1	0	0	0	0	2	2	1	1	1	1	0	0	0	0	1	1	1	1	1	1	0	0	0	0	1	1	1	1	28.3	10.4	10.4	12.054	106	106;136;219	4.9
Q9JJV2;D3YWS3	Q9JJV2;D3YWS3	1;1	1;1	1;1	Profilin-2;Profilin	Pfn2	sp|Q9JJV2|PROF2_MOUSE Profilin-2 OS=Mus musculus OX=10090 GN=Pfn2 PE=1 SV=3;tr|D3YWS3|D3YWS3_MOUSE Profilin OS=Mus musculus OX=10090 GN=Pfn2 PE=1 SV=1	2	1	1	1	0	0	0	1	0	0	1	1	0	0	0	0	0	1	0	0	1	1	0	0	0	0	0	1	0	0	1	1	0	0	10	10	10	15.032	140	140;110	5
Q925T6;H7BX90;H7BX09;D3YWY4;D3Z6T4;D3YZL8;Q6GQT7	Q925T6;H7BX90;H7BX09;D3YWY4;D3Z6T4;D3YZL8;Q6GQT7	1;1;1;1;1;1;1	1;1;1;1;1;1;1	1;1;1;1;1;1;1	Glutamate receptor-interacting protein 1	Grip1	sp|Q925T6|GRIP1_MOUSE Glutamate receptor-interacting protein 1 OS=Mus musculus OX=10090 GN=Grip1 PE=1 SV=1;tr|H7BX90|H7BX90_MOUSE Glutamate receptor-interacting protein 1 OS=Mus musculus OX=10090 GN=Grip1 PE=1 SV=1;tr|H7BX09|H7BX09_MOUSE Glutamate receptor	7	1	1	1	0	0	1	0	0	1	0	0	0	0	0	0	1	0	0	1	0	0	0	0	0	0	1	0	0	1	0	0	0	0	0.9	0.9	0.9	122.06	1127	1127;1060;1061;1075;1112;1112;1113	5
D3YXA5	D3YXA5	1	1	1		Rgs12	tr|D3YXA5|D3YXA5_MOUSE Regulator of G-protein-signaling 12 (Fragment) OS=Mus musculus OX=10090 GN=Rgs12 PE=1 SV=1	1	1	1	1	0	0	0	0	0	0	1	0	0	0	0	0	0	0	0	0	1	0	0	0	0	0	0	0	0	0	1	0	0	0	12.1	12.1	12.1	13.173	116	116	3
P61967;D3Z268;D3Z0D6;D3YXN0	P61967;D3Z268;D3Z0D6;D3YXN0	1;1;1;1	1;1;1;1	1;1;1;1	AP-1 complex subunit sigma-1A	Ap1s1	sp|P61967|AP1S1_MOUSE AP-1 complex subunit sigma-1A OS=Mus musculus OX=10090 GN=Ap1s1 PE=1 SV=1;tr|D3Z268|D3Z268_MOUSE AP-1 complex subunit sigma-1A (Fragment) OS=Mus musculus OX=10090 GN=Ap1s1 PE=1 SV=1;tr|D3Z0D6|D3Z0D6_MOUSE AP complex subunit sigma (Fra	4	1	1	1	0	0	1	1	0	0	0	0	0	0	0	0	1	1	0	0	0	0	0	0	0	0	1	1	0	0	0	0	0	0	8.2	8.2	8.2	18.733	158	158;77;150;189	5
Q91WD5;D3YXT0;A0A0A6YXD3;A0A0A6YW30	Q91WD5;D3YXT0;A0A0A6YXD3;A0A0A6YW30	3;3;2;2	3;3;2;2	3;3;2;2	NADH dehydrogenase [ubiquinone] iron-sulfur protein 2, mitochondrial	Ndufs2	sp|Q91WD5|NDUS2_MOUSE NADH dehydrogenase [ubiquinone] iron-sulfur protein 2, mitochondrial OS=Mus musculus OX=10090 GN=Ndufs2 PE=1 SV=1;tr|D3YXT0|D3YXT0_MOUSE Complex I-49kD OS=Mus musculus OX=10090 GN=Ndufs2 PE=1 SV=1;tr|A0A0A6YXD3|A0A0A6YXD3_MOUSE Comple	4	3	3	3	0	0	0	0	0	0	1	2	1	0	0	0	0	0	0	0	1	2	1	0	0	0	0	0	0	0	1	2	1	0	6.9	6.9	6.9	52.625	463	463;437;145;231	3.75
D3YYM6;D3Z1S8;Q91V55	D3YYM6;D3Z1S8;Q91V55	1;1;1	1;1;1	1;1;1		Rps5	tr|D3YYM6|D3YYM6_MOUSE 40S ribosomal protein S5 (Fragment) OS=Mus musculus OX=10090 GN=Rps5 PE=1 SV=1;tr|D3Z1S8|D3Z1S8_MOUSE 40S ribosomal protein S5 (Fragment) OS=Mus musculus OX=10090 GN=Rps5 PE=1 SV=1;tr|Q91V55|Q91V55_MOUSE 40S ribosomal protein S5 OS=M	3	1	1	1	0	0	1	0	0	0	0	0	0	0	0	0	1	0	0	0	0	0	0	0	0	0	1	0	0	0	0	0	0	0	8.2	8.2	8.2	20.413	182	182;189;204	5
Q6PIE5;D3YYN7	Q6PIE5;D3YYN7	21;21	8;8	8;8	Sodium/potassium-transporting ATPase subunit alpha-2	Atp1a2	sp|Q6PIE5|AT1A2_MOUSE Sodium/potassium-transporting ATPase subunit alpha-2 OS=Mus musculus OX=10090 GN=Atp1a2 PE=1 SV=1;tr|D3YYN7|D3YYN7_MOUSE Sodium/potassium-transporting ATPase subunit alpha OS=Mus musculus OX=10090 GN=Atp1a2 PE=1 SV=1	2	21	8	8	6	8	12	10	11	9	11	21	12	14	0	1	0	0	1	0	0	8	1	2	0	1	0	0	1	0	0	8	1	2	25.3	8.2	8.2	112.22	1020	1020;947	1.42	11
O35678;E9Q3B9;D3YYS6;Q3UFN1	O35678;E9Q3B9;D3YYS6;Q3UFN1	2;2;2;1	2;2;2;1	2;2;2;1	Monoglyceride lipase	Mgll	sp|O35678|MGLL_MOUSE Monoglyceride lipase OS=Mus musculus OX=10090 GN=Mgll PE=1 SV=1;tr|E9Q3B9|E9Q3B9_MOUSE Monoglyceride lipase OS=Mus musculus OX=10090 GN=Mgll PE=1 SV=1;tr|D3YYS6|D3YYS6_MOUSE Monoglyceride lipase OS=Mus musculus OX=10090 GN=Mgll PE=1 SV	4	2	2	2	0	0	0	0	0	0	0	2	0	0	0	0	0	0	0	0	0	2	0	0	0	0	0	0	0	0	0	2	0	0	8.9	8.9	8.9	33.387	303	303;319;331;258	4
S4R1Q4;D3YZ71	S4R1Q4;D3YZ71	1;1	1;1	1;1		Ap1m1	tr|S4R1Q4|S4R1Q4_MOUSE AP-1 complex subunit mu-1 (Fragment) OS=Mus musculus OX=10090 GN=Ap1m1 PE=1 SV=1;tr|D3YZ71|D3YZ71_MOUSE AP-1 complex subunit mu-1 (Fragment) OS=Mus musculus OX=10090 GN=Ap1m1 PE=1 SV=1	2	1	1	1	1	1	1	0	0	0	0	1	0	1	1	1	1	0	0	0	0	1	0	1	1	1	1	0	0	0	0	1	0	1	13.1	13.1	13.1	12.592	107	107;181	3.14	2
O88543;D3Z036	O88543;D3Z036	1;1	1;1	1;1	COP9 signalosome complex subunit 3	Cops3	sp|O88543|CSN3_MOUSE COP9 signalosome complex subunit 3 OS=Mus musculus OX=10090 GN=Cops3 PE=1 SV=3;tr|D3Z036|D3Z036_MOUSE COP9 signalosome complex subunit 3 (Fragment) OS=Mus musculus OX=10090 GN=Cops3 PE=1 SV=1	2	1	1	1	0	0	0	0	0	0	0	1	0	0	0	0	0	0	0	0	0	1	0	0	0	0	0	0	0	0	0	1	0	0	2.8	2.8	2.8	47.832	423	423;106	4
Q8K400;D3Z2Q2;D3Z079	Q8K400;D3Z2Q2;D3Z079	1;1;1	1;1;1	1;1;1	Syntaxin-binding protein 5	Stxbp5	sp|Q8K400|STXB5_MOUSE Syntaxin-binding protein 5 OS=Mus musculus OX=10090 GN=Stxbp5 PE=1 SV=3;tr|D3Z2Q2|D3Z2Q2_MOUSE Syntaxin-binding protein 5 OS=Mus musculus OX=10090 GN=Stxbp5 PE=1 SV=1;tr|D3Z079|D3Z079_MOUSE Syntaxin-binding protein 5 OS=Mus musculus O	3	1	1	1	0	0	1	0	0	0	1	0	0	1	0	0	1	0	0	0	1	0	0	1	0	0	1	0	0	0	1	0	0	1	1	1	1	127.65	1152	1152;1099;1116	1	3
D3Z0D9	D3Z0D9	1	1	1		Dnajc12	tr|D3Z0D9|D3Z0D9_MOUSE DnaJ homolog subfamily C member 12 (Fragment) OS=Mus musculus OX=10090 GN=Dnajc12 PE=1 SV=1	1	1	1	1	0	0	0	1	1	0	0	0	0	1	0	0	0	1	1	0	0	0	0	1	0	0	0	1	1	0	0	0	0	1	12.9	12.9	12.9	13.286	116	116	2.75	1
P62880;D3Z1T4;D3Z1M1;P29387;D3YZX3;E9QKR0;A0A0A6YVN9;V9GWY1;Q61011	P62880;D3Z1T4;D3Z1M1;P29387;D3YZX3;E9QKR0	5;5;5;4;3;3;2;2;1	2;2;2;2;0;0;2;2;0	2;2;2;2;0;0;2;2;0	Guanine nucleotide-binding protein G(I)/G(S)/G(T) subunit beta-2;Guanine nucleotide-binding protein subunit beta-4	Gnb2;Gnb4	sp|P62880|GBB2_MOUSE Guanine nucleotide-binding protein G(I)/G(S)/G(T) subunit beta-2 OS=Mus musculus OX=10090 GN=Gnb2 PE=1 SV=3;tr|D3Z1T4|D3Z1T4_MOUSE Guanine nucleotide-binding protein G(I)/G(S)/G(T) subunit beta-2 (Fragment) OS=Mus musculus OX=10090 GN=	9	5	2	2	0	1	3	2	1	0	4	4	3	3	0	1	1	1	0	0	2	1	1	1	0	1	1	1	0	0	2	1	1	1	13.5	4.1	4.1	37.331	340	340;188;227;340;296;382;73;83;340	4.12
Q8CHC4;D3Z656;D3Z1M7;E9Q7S0;F7BQW7;A0A338P6V7	Q8CHC4;D3Z656;D3Z1M7;E9Q7S0;F7BQW7	5;5;5;5;5;1	5;5;5;5;5;1	5;5;5;5;5;1	Synaptojanin-1	Synj1	sp|Q8CHC4|SYNJ1_MOUSE Synaptojanin-1 OS=Mus musculus OX=10090 GN=Synj1 PE=1 SV=3;tr|D3Z656|D3Z656_MOUSE Phosphoinositide 5-phosphatase OS=Mus musculus OX=10090 GN=Synj1 PE=1 SV=1;tr|D3Z1M7|D3Z1M7_MOUSE Phosphoinositide 5-phosphatase (Fragment) OS=Mus muscu	6	5	5	5	0	0	0	0	0	0	1	4	2	1	0	0	0	0	0	0	1	4	2	1	0	0	0	0	0	0	1	4	2	1	4.4	4.4	4.4	172.62	1574	1574;1607;693;1309;1324;88	1	8
D3Z3B8;Q811D0;H7BWY4;E9Q9H0	D3Z3B8;Q811D0;H7BWY4;E9Q9H0	5;4;4;4	3;2;2;2	3;2;2;2	Disks large homolog 1	Dlg1	tr|D3Z3B8|D3Z3B8_MOUSE Disks large homolog 1 OS=Mus musculus OX=10090 GN=Dlg1 PE=1 SV=1;sp|Q811D0|DLG1_MOUSE Disks large homolog 1 OS=Mus musculus OX=10090 GN=Dlg1 PE=1 SV=1;tr|H7BWY4|H7BWY4_MOUSE Disks large homolog 1 OS=Mus musculus OX=10090 GN=Dlg1 PE=1	4	5	3	3	0	0	0	0	0	0	3	5	0	1	0	0	0	0	0	0	2	3	0	0	0	0	0	0	0	0	2	3	0	0	9.6	5.5	5.5	91.622	834	834;905;872;912	2
Q61699;D3Z3I9;E9Q0U7	Q61699;D3Z3I9;E9Q0U7	1;1;1	1;1;1	1;1;1	Heat shock protein 105 kDa	Hsph1	sp|Q61699|HS105_MOUSE Heat shock protein 105 kDa OS=Mus musculus OX=10090 GN=Hsph1 PE=1 SV=2;tr|D3Z3I9|D3Z3I9_MOUSE Heat shock protein 105 kDa (Fragment) OS=Mus musculus OX=10090 GN=Hsph1 PE=1 SV=1;tr|E9Q0U7|E9Q0U7_MOUSE Heat shock protein 105 kDa OS=Mus m	3	1	1	1	0	0	1	0	0	0	1	1	0	0	0	0	1	0	0	0	1	1	0	0	0	0	1	0	0	0	1	1	0	0	1.5	1.5	1.5	96.406	858	858;144;817	1.67	1
Q9CWZ7;D3Z4B2;A0A494BAE3;A0A494BA20;A0A494BBF5;A0A494BA49;A0A494BAX2	Q9CWZ7;D3Z4B2;A0A494BAE3;A0A494BA20	4;4;3;3;1;1;1	4;4;3;3;1;1;1	4;4;3;3;1;1;1	Gamma-soluble NSF attachment protein	Napg	sp|Q9CWZ7|SNAG_MOUSE Gamma-soluble NSF attachment protein OS=Mus musculus OX=10090 GN=Napg PE=1 SV=1;tr|D3Z4B2|D3Z4B2_MOUSE Gamma-soluble NSF attachment protein (Fragment) OS=Mus musculus OX=10090 GN=Napg PE=1 SV=1;tr|A0A494BAE3|A0A494BAE3_MOUSE Gamma-solu	7	4	4	4	0	0	1	2	0	0	3	3	1	1	0	0	1	2	0	0	3	3	1	1	0	0	1	2	0	0	3	3	1	1	16	16	16	34.732	312	312;353;225;230;38;48;87	4
Q9D1H7;D3Z4J5	Q9D1H7;D3Z4J5	1;1	1;1	1;1	Golgi to ER traffic protein 4 homolog	Get4	sp|Q9D1H7|GET4_MOUSE Golgi to ER traffic protein 4 homolog OS=Mus musculus OX=10090 GN=Get4 PE=1 SV=2;tr|D3Z4J5|D3Z4J5_MOUSE Golgi to ER traffic protein 4 homolog (Fragment) OS=Mus musculus OX=10090 GN=Get4 PE=1 SV=1	2	1	1	1	0	0	0	1	1	0	0	0	0	0	0	0	0	1	1	0	0	0	0	0	0	0	0	1	1	0	0	0	0	0	5.5	5.5	5.5	36.525	327	327;246	2.2	2
Q5RJI5;D3Z5P0;G3UZ00	Q5RJI5;D3Z5P0	5;5;2	5;5;2	3;3;0	Serine/threonine-protein kinase BRSK1	Brsk1	sp|Q5RJI5|BRSK1_MOUSE Serine/threonine-protein kinase BRSK1 OS=Mus musculus OX=10090 GN=Brsk1 PE=1 SV=1;tr|D3Z5P0|D3Z5P0_MOUSE Serine/threonine-protein kinase BRSK1 OS=Mus musculus OX=10090 GN=Brsk1 PE=1 SV=1	3	5	5	3	0	1	0	0	0	0	0	1	5	2	0	1	0	0	0	0	0	1	5	2	0	0	0	0	0	0	0	0	3	0	7.1	7.1	4.8	85.154	778	778;703;92	2
D3Z7P3;F6U529;D3Z7P4	D3Z7P3;F6U529;D3Z7P4	1;1;1	1;1;1	1;1;1	Glutaminase kidney isoform, mitochondrial	Gls	sp|D3Z7P3|GLSK_MOUSE Glutaminase kidney isoform, mitochondrial OS=Mus musculus OX=10090 GN=Gls PE=1 SV=1;tr|F6U529|F6U529_MOUSE Glutaminase (Fragment) OS=Mus musculus OX=10090 GN=Gls PE=1 SV=1;tr|D3Z7P4|D3Z7P4_MOUSE Glutaminase OS=Mus musculus OX=10090 GN=	3	1	1	1	0	0	0	0	0	0	0	1	0	0	0	0	0	0	0	0	0	1	0	0	0	0	0	0	0	0	0	1	0	0	1.5	1.5	1.5	73.963	674	674;235;491	2
Q9CS84;E0CY11	Q9CS84;E0CY11	1;1	1;1	1;1	Neurexin-1	Nrxn1	sp|Q9CS84|NRX1A_MOUSE Neurexin-1 OS=Mus musculus OX=10090 GN=Nrxn1 PE=1 SV=3;tr|E0CY11|E0CY11_MOUSE Neurexin-1 OS=Mus musculus OX=10090 GN=Nrxn1 PE=1 SV=2	2	1	1	1	0	0	0	0	0	0	0	1	0	0	0	0	0	0	0	0	0	1	0	0	0	0	0	0	0	0	0	1	0	0	1.3	1.3	1.3	166.17	1514	1514;1495	1	1
P23506;F7D432;E9PWE0;E0CYV0;F6TXE3;F6V9F1	P23506;F7D432;E9PWE0;E0CYV0	4;4;4;4;1;1	4;4;4;4;1;1	4;4;4;4;1;1	Protein-L-isoaspartate(D-aspartate) O-methyltransferase;Protein-L-isoaspartate O-methyltransferase	Pcmt1	sp|P23506|PIMT_MOUSE Protein-L-isoaspartate(D-aspartate) O-methyltransferase OS=Mus musculus OX=10090 GN=Pcmt1 PE=1 SV=3;tr|F7D432|F7D432_MOUSE Protein-L-isoaspartate O-methyltransferase (Fragment) OS=Mus musculus OX=10090 GN=Pcmt1 PE=1 SV=1;tr|E9PWE0|E9PW	6	4	4	4	3	4	0	1	1	0	2	3	2	2	3	4	0	1	1	0	2	3	2	2	3	4	0	1	1	0	2	3	2	2	33.5	33.5	33.5	24.634	227	227;271;285;286;111;177	5
P28740;F8VQ42;E0CZ72	P28740;F8VQ42;E0CZ72	1;1;1	1;1;1	1;1;1	Kinesin-like protein KIF2A;Kinesin-like protein	Kif2a	sp|P28740|KIF2A_MOUSE Kinesin-like protein KIF2A OS=Mus musculus OX=10090 GN=Kif2a PE=1 SV=2;tr|F8VQ42|F8VQ42_MOUSE Kinesin-like protein (Fragment) OS=Mus musculus OX=10090 GN=Kif2a PE=1 SV=1;tr|E0CZ72|E0CZ72_MOUSE Kinesin-like protein OS=Mus musculus OX=1	3	1	1	1	0	0	0	0	0	0	0	0	1	1	0	0	0	0	0	0	0	0	1	1	0	0	0	0	0	0	0	0	1	1	1.6	1.6	1.6	79.755	705	705;671;743	2
P48453;E0CZ78;E9Q6P2;G3X8U7;P48455;A0A2I3BPC5	P48453;E0CZ78;E9Q6P2;G3X8U7	12;12;11;11;3;3	6;6;5;5;0;0	6;6;5;5;0;0	Serine/threonine-protein phosphatase 2B catalytic subunit beta isoform;Serine/threonine-protein phosphatase	Ppp3cb	sp|P48453|PP2BB_MOUSE Serine/threonine-protein phosphatase 2B catalytic subunit beta isoform OS=Mus musculus OX=10090 GN=Ppp3cb PE=1 SV=2;tr|E0CZ78|E0CZ78_MOUSE Serine/threonine-protein phosphatase OS=Mus musculus OX=10090 GN=Ppp3cb PE=1 SV=1;tr|E9Q6P2|E9Q	6	12	6	6	0	2	2	0	0	0	12	12	5	10	0	0	0	0	0	0	6	6	0	4	0	0	0	0	0	0	6	6	0	4	30.5	16	16	59.173	525	525;524;497;515;513;522	3.68	1
Q8R1Z4;H3BKX2;H3BK71;E9PUJ7	Q8R1Z4;H3BKX2;H3BK71;E9PUJ7	1;1;1;1	1;1;1;1	1;1;1;1	Protein phosphatase 1 regulatory subunit 42	Ppp1r42	sp|Q8R1Z4|PPR42_MOUSE Protein phosphatase 1 regulatory subunit 42 OS=Mus musculus OX=10090 GN=Ppp1r42 PE=1 SV=1;tr|H3BKX2|H3BKX2_MOUSE Protein phosphatase 1 regulatory subunit 42 (Fragment) OS=Mus musculus OX=10090 GN=Ppp1r42 PE=4 SV=1;tr|H3BK71|H3BK71_MOU	4	1	1	1	0	0	1	0	0	0	0	0	0	0	0	0	1	0	0	0	0	0	0	0	0	0	1	0	0	0	0	0	0	0	4.5	4.5	4.5	41.151	357	357;82;87;269	3
P84075;E9PV73;A2A7R5;P62748;Q91X97;A2A7R6;A0A1Y7VMK3;D3YVA2	P84075;E9PV73;A2A7R5	3;3;2;1;1;1;1;1	3;3;2;1;1;1;1;1	3;3;2;1;1;1;1;1	Neuron-specific calcium-binding protein hippocalcin	Hpca	sp|P84075|HPCA_MOUSE Neuron-specific calcium-binding protein hippocalcin OS=Mus musculus OX=10090 GN=Hpca PE=1 SV=2;tr|E9PV73|E9PV73_MOUSE Neuron-specific calcium-binding protein hippocalcin (Fragment) OS=Mus musculus OX=10090 GN=Hpca PE=1 SV=1;tr|A2A7R5|A	8	3	3	3	1	1	1	1	0	0	1	2	0	2	1	1	1	1	0	0	1	2	0	2	1	1	1	1	0	0	1	2	0	2	16.1	16.1	16.1	22.427	193	193;187;161;193;193;45;168;187	5
Q9Z218;Q80VM5;Q5U4C2;E9PWX1	Q9Z218;Q80VM5;Q5U4C2;E9PWX1	4;4;4;4	4;4;4;4	3;3;3;3	Dipeptidyl aminopeptidase-like protein 6	Dpp6	sp|Q9Z218|DPP6_MOUSE Dipeptidyl aminopeptidase-like protein 6 OS=Mus musculus OX=10090 GN=Dpp6 PE=1 SV=1;tr|Q80VM5|Q80VM5_MOUSE Dipeptidyl aminopeptidase-like protein 6 OS=Mus musculus OX=10090 GN=Dpp6 PE=1 SV=1;tr|Q5U4C2|Q5U4C2_MOUSE Dipeptidyl aminopepti	4	4	4	3	0	0	0	0	0	0	1	4	0	1	0	0	0	0	0	0	1	4	0	1	0	0	0	0	0	0	1	3	0	1	6	6	4.9	91.259	804	804;803;801;859	2
Q91V12;E9PYH2	Q91V12;E9PYH2	20;20	20;20	20;20	Cytosolic acyl coenzyme A thioester hydrolase	Acot7	sp|Q91V12|BACH_MOUSE Cytosolic acyl coenzyme A thioester hydrolase OS=Mus musculus OX=10090 GN=Acot7 PE=1 SV=2;tr|E9PYH2|E9PYH2_MOUSE Cytosolic acyl coenzyme A thioester hydrolase OS=Mus musculus OX=10090 GN=Acot7 PE=1 SV=1	2	20	20	20	18	17	4	4	5	0	13	17	18	18	18	17	4	4	5	0	13	17	18	18	18	17	4	4	5	0	13	17	18	18	47	47	47	42.536	381	381;384	3.9	10
Q61147;G3X9T8;G3X8Q5;E9PZD8;G3UXG1	Q61147;G3X9T8;G3X8Q5;E9PZD8	8;8;8;8;2	8;8;8;8;2	8;8;8;8;2	Ceruloplasmin	Cp	sp|Q61147|CERU_MOUSE Ceruloplasmin OS=Mus musculus OX=10090 GN=Cp PE=1 SV=2;tr|G3X9T8|G3X9T8_MOUSE Ceruloplasmin OS=Mus musculus OX=10090 GN=Cp PE=1 SV=1;tr|G3X8Q5|G3X8Q5_MOUSE Ceruloplasmin OS=Mus musculus OX=10090 GN=Cp PE=1 SV=1;tr|E9PZD8|E9PZD8_MOUSE C	5	8	8	8	0	0	0	0	0	0	5	5	0	0	0	0	0	0	0	0	5	5	0	0	0	0	0	0	0	0	5	5	0	0	10.2	10.2	10.2	121.15	1061	1061;1060;1085;1086;120	1.31	9
E9Q0N0;Q9Z0R4;E9Q3I5;E9Q3I4;E9Q3I9;E9Q3I8;Q6NZJ5;A0A338P7I4;Q9Z0R6;E9QNG1;B2RR82;F6ZLP6;Q6J1S9;F6R6C8;F6U8U1;F6TCC6	E9Q0N0;Q9Z0R4;E9Q3I5;E9Q3I4;E9Q3I9;E9Q3I8	25;24;20;19;18;17;5;4;3;3;3;2;2;2;2;1	25;24;20;19;18;17;5;4;3;3;3;2;2;2;2;1	16;15;11;10;11;10;1;4;2;2;2;2;2;2;2;1	Intersectin-1	Itsn1	tr|E9Q0N0|E9Q0N0_MOUSE Intersectin-1 OS=Mus musculus OX=10090 GN=Itsn1 PE=1 SV=1;sp|Q9Z0R4|ITSN1_MOUSE Intersectin-1 OS=Mus musculus OX=10090 GN=Itsn1 PE=1 SV=2;tr|E9Q3I5|E9Q3I5_MOUSE Intersectin-1 OS=Mus musculus OX=10090 GN=Itsn1 PE=1 SV=1;tr|E9Q3I4|E9Q3	16	25	25	16	0	0	0	25	0	0	0	0	0	0	0	0	0	25	0	0	0	0	0	0	0	0	0	16	0	0	0	0	0	0	19.4	19.4	12.9	194.89	1719	1719;1714;1218;1176;1147;1142;621;279;1659;1658;1685;73;77;256;346;173	1.07	26
O55131;E9Q9F5;E9Q1G8;Q8C650;Q9DA97;A0A0R4J233;S4R2P6;A0A1W2P6J7	O55131;E9Q9F5;E9Q1G8	4;4;4;1;1;1;1;1	4;4;4;1;1;1;1;1	4;4;4;1;1;1;1;1	Septin-7	2007-09-01	sp|O55131|SEPT7_MOUSE Septin-7 OS=Mus musculus OX=10090 GN=Septin7 PE=1 SV=1;tr|E9Q9F5|E9Q9F5_MOUSE Septin OS=Mus musculus OX=10090 GN=Septin7 PE=1 SV=2;tr|E9Q1G8|E9Q1G8_MOUSE Septin OS=Mus musculus OX=10090 GN=Septin7 PE=1 SV=2	8	4	4	4	1	1	1	0	0	0	1	4	1	3	1	1	1	0	0	0	1	4	1	3	1	1	1	0	0	0	1	4	1	3	13.8	13.8	13.8	50.549	436	436;437;437;452;430;427;429;452	3.1
Q9QYC0;E9Q1K3;F8WHZ9;F8WGR0;F6RDR0;A0A0J9YVI4	Q9QYC0;E9Q1K3;F8WHZ9;F8WGR0;F6RDR0;A0A0J9YVI4	2;2;2;2;1;1	2;2;2;2;1;1	2;2;2;2;1;1	Alpha-adducin	Add1	sp|Q9QYC0|ADDA_MOUSE Alpha-adducin OS=Mus musculus OX=10090 GN=Add1 PE=1 SV=2;tr|E9Q1K3|E9Q1K3_MOUSE Alpha-adducin OS=Mus musculus OX=10090 GN=Add1 PE=1 SV=1;tr|F8WHZ9|F8WHZ9_MOUSE Alpha-adducin OS=Mus musculus OX=10090 GN=Add1 PE=1 SV=1;tr|F8WGR0|F8WGR0_M	6	2	2	2	0	0	0	0	0	0	0	0	2	2	0	0	0	0	0	0	0	0	2	2	0	0	0	0	0	0	0	0	2	2	4.9	4.9	4.9	80.646	735	735;660;662;663;160;248	1.8	1
O08532;E9Q1X8;Q8C6Y3	O08532;E9Q1X8	4;4;1	4;4;1	4;4;1	Voltage-dependent calcium channel subunit alpha-2/delta-1;Voltage-dependent calcium channel subunit alpha-2-1;Voltage-dependent calcium channel subunit delta-1	Cacna2d1	sp|O08532|CA2D1_MOUSE Voltage-dependent calcium channel subunit alpha-2/delta-1 OS=Mus musculus OX=10090 GN=Cacna2d1 PE=1 SV=1;tr|E9Q1X8|E9Q1X8_MOUSE Voltage-dependent calcium channel subunit alpha-2/delta-1 OS=Mus musculus OX=10090 GN=Cacna2d1 PE=1 SV=2	3	4	4	4	0	0	0	0	0	0	0	2	3	1	0	0	0	0	0	0	0	2	3	1	0	0	0	0	0	0	0	2	3	1	4.3	4.3	4.3	124.63	1103	1103;1091;100	1	6
E9Q3M9;F7B0R9	E9Q3M9	4;1	4;1	4;1		2010300C02Rik	tr|E9Q3M9|E9Q3M9_MOUSE Capping protein-inhibiting regulator of actin-like OS=Mus musculus OX=10090 GN=Cracdl PE=1 SV=1	2	4	4	4	0	0	4	0	0	0	0	0	0	0	0	0	4	0	0	0	0	0	0	0	0	0	4	0	0	0	0	0	0	0	6	6	6	125.91	1175	1175;652	1	4
P62492;P46638;G3UZL4;G3UY29;E9Q3P9;F8WGS1;G3UZD3	P62492;P46638;G3UZL4;G3UY29;E9Q3P9;F8WGS1;G3UZD3	2;2;2;2;2;2;2	2;2;2;2;2;2;2	2;2;2;2;2;2;2	Ras-related protein Rab-11A;Ras-related protein Rab-11B	Rab11a;Rab11b	sp|P62492|RB11A_MOUSE Ras-related protein Rab-11A OS=Mus musculus OX=10090 GN=Rab11a PE=1 SV=3;sp|P46638|RB11B_MOUSE Ras-related protein Rab-11B OS=Mus musculus OX=10090 GN=Rab11b PE=1 SV=3;tr|G3UZL4|G3UZL4_MOUSE Ras-related protein Rab-11B (Fragment) OS=M	7	2	2	2	0	0	0	0	0	0	1	2	0	0	0	0	0	0	0	0	1	2	0	0	0	0	0	0	0	0	1	2	0	0	10.2	10.2	10.2	24.393	216	216;218;125;149;153;155;193	5
Q3UHD1;E9Q4H5	Q3UHD1;E9Q4H5	1;1	1;1	1;1	Brain-specific angiogenesis inhibitor 1	Bai1;Adgrb1	sp|Q3UHD1|AGRB1_MOUSE Adhesion G protein-coupled receptor B1 OS=Mus musculus OX=10090 GN=Adgrb1 PE=1 SV=1;tr|E9Q4H5|E9Q4H5_MOUSE Adhesion G protein-coupled receptor B1 OS=Mus musculus OX=10090 GN=Adgrb1 PE=1 SV=1	2	1	1	1	0	0	0	1	0	0	0	0	0	0	0	0	0	1	0	0	0	0	0	0	0	0	0	1	0	0	0	0	0	0	0.9	0.9	0.9	173.29	1582	1582;642	1	1
E9Q557;E9PZW0	E9Q557;E9PZW0	7;5	7;5	7;5	Desmoplakin	Dsp	sp|E9Q557|DESP_MOUSE Desmoplakin OS=Mus musculus OX=10090 GN=Dsp PE=1 SV=1;tr|E9PZW0|E9PZW0_MOUSE Desmoplakin OS=Mus musculus OX=10090 GN=Dsp PE=1 SV=1	2	7	7	7	4	1	0	3	0	0	2	1	0	0	4	1	0	3	0	0	2	1	0	0	4	1	0	3	0	0	2	1	0	0	2.9	2.9	2.9	332.91	2883	2883;2284	3.19	4
P51830;E9Q706	P51830;E9Q706	1;1	1;1	1;1	Adenylate cyclase type 9	Adcy9	sp|P51830|ADCY9_MOUSE Adenylate cyclase type 9 OS=Mus musculus OX=10090 GN=Adcy9 PE=1 SV=1;tr|E9Q706|E9Q706_MOUSE Adenylate cyclase type 9 OS=Mus musculus OX=10090 GN=Adcy9 PE=1 SV=1	2	1	1	1	0	0	0	0	0	0	0	1	0	0	0	0	0	0	0	0	0	1	0	0	0	0	0	0	0	0	0	1	0	0	1.1	1.1	1.1	150.95	1353	1353;1116	1	1
Q8CAQ8;E9QAY6;E9Q800;A0A0U1RQ14;A0A0U1RP81	Q8CAQ8;E9QAY6;E9Q800;A0A0U1RQ14;A0A0U1RP81	2;2;2;1;1	2;2;2;1;1	2;2;2;1;1	MICOS complex subunit Mic60	Immt	sp|Q8CAQ8|MIC60_MOUSE MICOS complex subunit Mic60 OS=Mus musculus OX=10090 GN=Immt PE=1 SV=1;tr|E9QAY6|E9QAY6_MOUSE MICOS complex subunit MIC60 OS=Mus musculus OX=10090 GN=Immt PE=1 SV=1;tr|E9Q800|E9Q800_MOUSE MICOS complex subunit MIC60 OS=Mus musculus OX	5	2	2	2	0	0	1	1	1	0	1	1	1	1	0	0	1	1	1	0	1	1	1	1	0	0	1	1	1	0	1	1	1	1	3.2	3.2	3.2	83.899	757	757;470;679;289;488	2.6
F7AAP4;E9Q828;Q6Q477	F7AAP4;E9Q828;Q6Q477	12;12;11	2;2;1	2;2;1	Calcium-transporting ATPase	Atp2b4	tr|F7AAP4|F7AAP4_MOUSE Calcium-transporting ATPase OS=Mus musculus OX=10090 GN=Atp2b4 PE=1 SV=1;tr|E9Q828|E9Q828_MOUSE Calcium-transporting ATPase OS=Mus musculus OX=10090 GN=Atp2b4 PE=1 SV=1;sp|Q6Q477|AT2B4_MOUSE Plasma membrane calcium-transporting ATPas	3	12	2	2	2	3	8	4	1	2	9	9	5	7	0	0	0	0	0	0	1	2	1	0	0	0	0	0	0	0	1	2	1	0	11.4	2	2	128.56	1166	1166;1172;1205	1	4
Q8BKC8;F6W459;E9Q8A3	Q8BKC8;F6W459;E9Q8A3	1;1;1	1;1;1	1;1;1	Phosphatidylinositol 4-kinase beta	Pi4kb	sp|Q8BKC8|PI4KB_MOUSE Phosphatidylinositol 4-kinase beta OS=Mus musculus OX=10090 GN=Pi4kb PE=1 SV=2;tr|F6W459|F6W459_MOUSE Phosphatidylinositol 4-kinase beta (Fragment) OS=Mus musculus OX=10090 GN=Pi4kb PE=1 SV=1;tr|E9Q8A3|E9Q8A3_MOUSE Phosphatidylinosito	3	1	1	1	0	0	1	0	0	0	0	0	0	0	0	0	1	0	0	0	0	0	0	0	0	0	1	0	0	0	0	0	0	0	2	2	2	91.514	816	816;227;828	1	1
E9Q9C5;P63082	E9Q9C5;P63082	1;1	1;1	1;1	V-type proton ATPase 16 kDa proteolipid subunit	Atp6v0c	tr|E9Q9C5|E9Q9C5_MOUSE V-type proton ATPase proteolipid subunit (Fragment) OS=Mus musculus OX=10090 GN=Atp6v0c PE=1 SV=1;sp|P63082|VATL_MOUSE V-type proton ATPase 16 kDa proteolipid subunit OS=Mus musculus OX=10090 GN=Atp6v0c PE=1 SV=1	2	1	1	1	0	0	0	0	0	0	0	1	0	0	0	0	0	0	0	0	0	1	0	0	0	0	0	0	0	0	0	1	0	0	12	12	12	15.265	150	150;155	5
E9QKC0;A0A0A6YW90	E9QKC0;A0A0A6YW90	47;40	4;0	0;0		Gria2	tr|E9QKC0|E9QKC0_MOUSE Glutamate receptor OS=Mus musculus OX=10090 GN=Gria2 PE=1 SV=1;tr|A0A0A6YW90|A0A0A6YW90_MOUSE Glutamate receptor OS=Mus musculus OX=10090 GN=Gria2 PE=1 SV=1	2	47	4	0	0	5	36	28	3	0	45	45	38	43	0	0	1	2	0	0	3	4	2	2	0	0	0	0	0	0	0	0	0	0	48.7	3.5	0	98.817	883	883;777	1.64	8
Q8BZ98;E9QLL2	Q8BZ98;E9QLL2	11;11	5;5	4;4	Dynamin-3	Dnm3	sp|Q8BZ98|DYN3_MOUSE Dynamin-3 OS=Mus musculus OX=10090 GN=Dnm3 PE=1 SV=1;tr|E9QLL2|E9QLL2_MOUSE Dynamin GTPase OS=Mus musculus OX=10090 GN=Dnm3 PE=1 SV=1	2	11	5	4	2	1	0	10	1	0	3	4	2	2	0	0	0	5	0	0	0	0	0	0	0	0	0	4	0	0	0	0	0	0	14.7	8.2	6.5	97.189	863	863;863	1.83	1
Q3UVX5;E9QMC2	Q3UVX5;E9QMC2	4;4	4;4	4;4	Metabotropic glutamate receptor 5	Grm5	sp|Q3UVX5|GRM5_MOUSE Metabotropic glutamate receptor 5 OS=Mus musculus OX=10090 GN=Grm5 PE=1 SV=2;tr|E9QMC2|E9QMC2_MOUSE Metabotropic glutamate receptor 5 OS=Mus musculus OX=10090 GN=Grm5 PE=1 SV=1	2	4	4	4	0	0	1	0	0	0	3	1	0	0	0	0	1	0	0	0	3	1	0	0	0	0	1	0	0	0	3	1	0	0	4.2	4.2	4.2	131.86	1203	1203;1171	1	6
Q9CPW0;E9QNF7	Q9CPW0;E9QNF7	1;1	1;1	1;1	Contactin-associated protein-like 2	Cntnap2	sp|Q9CPW0|CNTP2_MOUSE Contactin-associated protein-like 2 OS=Mus musculus OX=10090 GN=Cntnap2 PE=1 SV=2;tr|E9QNF7|E9QNF7_MOUSE Contactin-associated protein-like 2 OS=Mus musculus OX=10090 GN=Cntnap2 PE=1 SV=1	2	1	1	1	0	0	0	0	0	0	0	1	0	1	0	0	0	0	0	0	0	1	0	1	0	0	0	0	0	0	0	1	0	1	0.8	0.8	0.8	148.2	1332	1332;1332	1	2
E9QNW6;Q8VDG7	E9QNW6;Q8VDG7	1;1	1;1	1;1	Platelet-activating factor acetylhydrolase 2, cytoplasmic	Pafah2	tr|E9QNW6|E9QNW6_MOUSE Platelet-activating factor acetylhydrolase OS=Mus musculus OX=10090 GN=Pafah2 PE=1 SV=1;sp|Q8VDG7|PAFA2_MOUSE Platelet-activating factor acetylhydrolase 2, cytoplasmic OS=Mus musculus OX=10090 GN=Pafah2 PE=1 SV=2	2	1	1	1	0	0	0	0	0	0	0	0	1	0	0	0	0	0	0	0	0	0	1	0	0	0	0	0	0	0	0	0	1	0	5.1	5.1	5.1	46.2	415	415;390	2
Q8BGZ1;F2Z3Z1	Q8BGZ1;F2Z3Z1	1;1	1;1	1;1	Hippocalcin-like protein 4	Hpcal4	sp|Q8BGZ1|HPCL4_MOUSE Hippocalcin-like protein 4 OS=Mus musculus OX=10090 GN=Hpcal4 PE=1 SV=3;tr|F2Z3Z1|F2Z3Z1_MOUSE Hippocalcin-like protein 4 (Fragment) OS=Mus musculus OX=10090 GN=Hpcal4 PE=1 SV=1	2	1	1	1	0	0	0	0	0	0	0	0	0	1	0	0	0	0	0	0	0	0	0	1	0	0	0	0	0	0	0	0	0	1	11	11	11	22.215	191	191;155	5
Q9ERR1;Q9CZA6;F6Q325	Q9ERR1;Q9CZA6;F6Q325	1;1;1	1;1;1	1;1;1	Nuclear distribution protein nudE-like 1;Nuclear distribution protein nudE homolog 1	Ndel1;Nde1	sp|Q9ERR1|NDEL1_MOUSE Nuclear distribution protein nudE-like 1 OS=Mus musculus OX=10090 GN=Ndel1 PE=1 SV=2;sp|Q9CZA6|NDE1_MOUSE Nuclear distribution protein nudE homolog 1 OS=Mus musculus OX=10090 GN=Nde1 PE=1 SV=1;tr|F6Q325|F6Q325_MOUSE Nuclear distributi	3	1	1	1	0	0	0	0	0	0	0	0	0	1	0	0	0	0	0	0	0	0	0	1	0	0	0	0	0	0	0	0	0	1	3.5	3.5	3.5	38.365	345	345;344;175	3
Q9DBE8;F6RBY3	Q9DBE8;F6RBY3	1;1	1;1	1;1	Alpha-1,3/1,6-mannosyltransferase ALG2	Alg2	sp|Q9DBE8|ALG2_MOUSE Alpha-1,3/1,6-mannosyltransferase ALG2 OS=Mus musculus OX=10090 GN=Alg2 PE=1 SV=2;tr|F6RBY3|F6RBY3_MOUSE Alpha-1,3/1,6-mannosyltransferase ALG2 (Fragment) OS=Mus musculus OX=10090 GN=Alg2 PE=1 SV=1	2	1	1	1	0	0	0	0	0	0	0	1	0	0	0	0	0	0	0	0	0	1	0	0	0	0	0	0	0	0	0	1	0	0	2.2	2.2	2.2	47.404	415	415;177	4
Q9JJK2;F6RJV6	Q9JJK2;F6RJV6	1;1	1;1	1;1	LanC-like protein 2	Lancl2	sp|Q9JJK2|LANC2_MOUSE LanC-like protein 2 OS=Mus musculus OX=10090 GN=Lancl2 PE=1 SV=1;tr|F6RJV6|F6RJV6_MOUSE LanC-like protein 2 (Fragment) OS=Mus musculus OX=10090 GN=Lancl2 PE=1 SV=1	2	1	1	1	0	0	0	0	0	0	1	0	0	0	0	0	0	0	0	0	1	0	0	0	0	0	0	0	0	0	1	0	0	0	2.2	2.2	2.2	50.777	450	450;441	4
F6VQZ6;Q3UH99	F6VQZ6;Q3UH99	4;3	4;3	4;3	Protein shisa-6 homolog	Shisa6	tr|F6VQZ6|F6VQZ6_MOUSE Protein shisa-6 (Fragment) OS=Mus musculus OX=10090 GN=Shisa6 PE=1 SV=1;sp|Q3UH99|SHSA6_MOUSE Protein shisa-6 OS=Mus musculus OX=10090 GN=Shisa6 PE=1 SV=1	2	4	4	4	0	0	0	0	0	0	3	2	2	3	0	0	0	0	0	0	3	2	2	3	0	0	0	0	0	0	3	2	2	3	13.2	13.2	13.2	56.12	501	501;525	1.93	3
Q8BVI5;F7CJY7;F6X4N5	Q8BVI5;F7CJY7;F6X4N5	1;1;1	1;1;1	1;1;1	Syntaxin-16	Stx16	sp|Q8BVI5|STX16_MOUSE Syntaxin-16 OS=Mus musculus OX=10090 GN=Stx16 PE=1 SV=3;tr|F7CJY7|F7CJY7_MOUSE Syntaxin-16 (Fragment) OS=Mus musculus OX=10090 GN=Stx16 PE=1 SV=1;tr|F6X4N5|F6X4N5_MOUSE Syntaxin-16 OS=Mus musculus OX=10090 GN=Stx16 PE=1 SV=1	3	1	1	1	0	0	0	0	0	0	1	0	0	0	0	0	0	0	0	0	1	0	0	0	0	0	0	0	0	0	1	0	0	0	2.8	2.8	2.8	37.08	326	326;258;327	4
Q60668;F6ZV59;G5E8G0;G3X9W0;E9Q5B6;F6SHF3;F7A465	Q60668;F6ZV59;G5E8G0;G3X9W0;E9Q5B6;F6SHF3	3;3;3;3;2;2;1	3;3;3;3;2;2;1	2;2;2;2;1;2;1	Heterogeneous nuclear ribonucleoprotein D0	Hnrnpd	sp|Q60668|HNRPD_MOUSE Heterogeneous nuclear ribonucleoprotein D0 OS=Mus musculus OX=10090 GN=Hnrnpd PE=1 SV=2;tr|F6ZV59|F6ZV59_MOUSE Heterogeneous nuclear ribonucleoprotein D0 (Fragment) OS=Mus musculus OX=10090 GN=Hnrnpd PE=1 SV=1;tr|G5E8G0|G5E8G0_MOUSE H	7	3	3	2	0	1	0	0	0	0	0	3	1	2	0	1	0	0	0	0	0	3	1	2	0	1	0	0	0	0	0	2	1	1	8.7	8.7	6.5	38.354	355	355;216;287;336;107;150;131	3.5
P05201;F7ALS6	P05201;F7ALS6	3;3	3;3	3;3	Aspartate aminotransferase, cytoplasmic	Got1	sp|P05201|AATC_MOUSE Aspartate aminotransferase, cytoplasmic OS=Mus musculus OX=10090 GN=Got1 PE=1 SV=3;tr|F7ALS6|F7ALS6_MOUSE Aspartate transaminase (Fragment) OS=Mus musculus OX=10090 GN=Got1 PE=1 SV=1	2	3	3	3	0	0	0	0	0	0	0	3	0	2	0	0	0	0	0	0	0	3	0	2	0	0	0	0	0	0	0	3	0	2	8	8	8	46.247	413	413;182	4
Q8CFX3;F7BJK1	Q8CFX3;F7BJK1	2;2	2;2	2;2		Pcdh1	tr|Q8CFX3|Q8CFX3_MOUSE Protocadherin 1 OS=Mus musculus OX=10090 GN=Pcdh1 PE=1 SV=1;tr|F7BJK1|F7BJK1_MOUSE Protocadherin 1 (Fragment) OS=Mus musculus OX=10090 GN=Pcdh1 PE=1 SV=1	2	2	2	2	0	0	0	0	0	0	1	2	0	0	0	0	0	0	0	0	1	2	0	0	0	0	0	0	0	0	1	2	0	0	3.2	3.2	3.2	112.41	1038	1038;1077	1	3
F7C082	F7C082	1	1	1		Hfm1	tr|F7C082|F7C082_MOUSE Probable ATP-dependent DNA helicase HFM1 (Fragment) OS=Mus musculus OX=10090 GN=Hfm1 PE=4 SV=1	1	1	1	1	0	0	0	0	0	0	0	0	1	0	0	0	0	0	0	0	0	0	1	0	0	0	0	0	0	0	0	0	1	0	30.6	30.6	30.6	5.4793	49	49	5
F7CUU8	F7CUU8	1	1	1		Ppfibp1	tr|F7CUU8|F7CUU8_MOUSE Liprin-beta-1 (Fragment) OS=Mus musculus OX=10090 GN=Ppfibp1 PE=1 SV=1	1	1	1	1	0	0	0	1	0	0	0	0	0	0	0	0	0	1	0	0	0	0	0	0	0	0	0	1	0	0	0	0	0	0	5.8	5.8	5.8	27.973	242	242	5
Q8VHW2;F7CZ64;A0A0N4SWF8	Q8VHW2;F7CZ64	15;15;2	15;15;2	15;15;2	Voltage-dependent calcium channel gamma-8 subunit;Voltage-dependent calcium channel gamma subunit	Cacng8	sp|Q8VHW2|CCG8_MOUSE Voltage-dependent calcium channel gamma-8 subunit OS=Mus musculus OX=10090 GN=Cacng8 PE=1 SV=1;tr|F7CZ64|F7CZ64_MOUSE Voltage-dependent calcium channel gamma-8 subunit OS=Mus musculus OX=10090 GN=Cacng8 PE=1 SV=2	3	15	15	15	2	4	2	0	0	0	13	15	8	11	2	4	2	0	0	0	13	15	8	11	2	4	2	0	0	0	13	15	8	11	48.5	48.5	48.5	43.452	423	423;423;54	2.76	40
Q99MI1;V9GX53;V9GWT6;V9GXH3;F8VPM7;V9GXF0;V9GXP8	Q99MI1;V9GX53;V9GWT6;V9GXH3;F8VPM7;V9GXF0;V9GXP8	2;2;2;2;2;1;1	2;2;2;2;2;1;1	2;2;2;2;2;1;1	ELKS/Rab6-interacting/CAST family member 1	Erc1	sp|Q99MI1|RB6I2_MOUSE ELKS/Rab6-interacting/CAST family member 1 OS=Mus musculus OX=10090 GN=Erc1 PE=1 SV=1;tr|V9GX53|V9GX53_MOUSE ELKS/Rab6-interacting/CAST family member 1 OS=Mus musculus OX=10090 GN=Erc1 PE=1 SV=1;tr|V9GWT6|V9GWT6_MOUSE ELKS/Rab6-intera	7	2	2	2	0	0	0	0	0	0	2	0	0	0	0	0	0	0	0	0	2	0	0	0	0	0	0	0	0	0	2	0	0	0	3.1	3.1	3.1	128.33	1120	1120;720;948;992;1120;1088;1116	2
Q9R0K7;Q3UHH0;F8WHB1;S4R1C4	Q9R0K7;Q3UHH0;F8WHB1;S4R1C4	21;21;21;19	11;11;11;10	11;11;11;10	Plasma membrane calcium-transporting ATPase 2;Calcium-transporting ATPase	Atp2b2	sp|Q9R0K7|AT2B2_MOUSE Plasma membrane calcium-transporting ATPase 2 OS=Mus musculus OX=10090 GN=Atp2b2 PE=1 SV=2;tr|Q3UHH0|Q3UHH0_MOUSE Calcium-transporting ATPase OS=Mus musculus OX=10090 GN=Atp2b2 PE=1 SV=1;tr|F8WHB1|F8WHB1_MOUSE Calcium-transporting ATP	4	21	11	11	1	1	10	5	3	1	13	15	5	10	0	0	5	3	2	0	6	8	2	3	0	0	5	3	2	0	6	8	2	3	21.6	13.9	13.9	132.59	1198	1198;1194;1243;1154	1	29
P11798;F8WIS9;Q6PHZ2;F8WHB5;Q8CCM0;E9Q1V9;E9Q1W0;E9Q1T1;A0A0G2JGS4;Q923T9;A0A2I3BQP6;D3Z7K9;F6WHR9;A0A286YCB8;A0A286YDL6	P11798;F8WIS9	7;7;3;3;3;3;3;3;3;2;2;1;1;1;1	7;7;3;3;3;3;3;3;3;2;2;1;1;1;1	4;4;0;3;0;0;0;0;0;0;0;1;0;0;0	Calcium/calmodulin-dependent protein kinase type II subunit alpha	Camk2a	sp|P11798|KCC2A_MOUSE Calcium/calmodulin-dependent protein kinase type II subunit alpha OS=Mus musculus OX=10090 GN=Camk2a PE=1 SV=2;tr|F8WIS9|F8WIS9_MOUSE Calcium/calmodulin-dependent protein kinase OS=Mus musculus OX=10090 GN=Camk2a PE=1 SV=1	15	7	7	4	4	2	0	0	0	0	1	3	5	7	4	2	0	0	0	0	1	3	5	7	2	1	0	0	0	0	1	1	3	4	19.9	19.9	11.1	54.114	478	478;489;499;189;361;488;512;533;533;529;565;108;177;224;241	2.92	1
Q8BXR9;F8WIZ7;V9GXX3	Q8BXR9;F8WIZ7;V9GXX3	15;15;12	15;15;12	15;15;12	Oxysterol-binding protein-related protein 6;Oxysterol-binding protein	Osbpl6	sp|Q8BXR9|OSBL6_MOUSE Oxysterol-binding protein-related protein 6 OS=Mus musculus OX=10090 GN=Osbpl6 PE=1 SV=1;tr|F8WIZ7|F8WIZ7_MOUSE Oxysterol-binding protein OS=Mus musculus OX=10090 GN=Osbpl6 PE=1 SV=1;tr|V9GXX3|V9GXX3_MOUSE Oxysterol-binding protein (F	3	15	15	15	0	0	0	15	0	0	0	0	0	0	0	0	0	15	0	0	0	0	0	0	0	0	0	15	0	0	0	0	0	0	21.4	21.4	21.4	108.92	959	959;967;801	1.36	16
P17710;G3UVV4;B4YB29;D3YYR4;D3Z365	P17710;G3UVV4	4;4;1;1;1	4;4;1;1;1	4;4;1;1;1	Hexokinase-1;Hexokinase	Hk1	sp|P17710|HXK1_MOUSE Hexokinase-1 OS=Mus musculus OX=10090 GN=Hk1 PE=1 SV=3;tr|G3UVV4|G3UVV4_MOUSE Hexokinase OS=Mus musculus OX=10090 GN=Hk1 PE=1 SV=1	5	4	4	4	0	1	0	0	0	1	1	2	0	0	0	1	0	0	0	1	1	2	0	0	0	1	0	0	0	1	1	2	0	0	5.6	5.6	5.6	108.3	974	974;917;49;184;223	1.8	1
Q69Z98;G3UXM5;G3UWV4;G3UZ19;G3UYN4	Q69Z98;G3UXM5;G3UWV4;G3UZ19	4;4;4;2;1	2;2;2;2;1	2;2;2;2;1	Serine/threonine-protein kinase BRSK2	Brsk2	sp|Q69Z98|BRSK2_MOUSE Serine/threonine-protein kinase BRSK2 OS=Mus musculus OX=10090 GN=Brsk2 PE=1 SV=2;tr|G3UXM5|G3UXM5_MOUSE Serine/threonine-protein kinase BRSK2 (Fragment) OS=Mus musculus OX=10090 GN=Brsk2 PE=1 SV=1;tr|G3UWV4|G3UWV4_MOUSE Serine/threon	5	4	2	2	0	1	0	0	0	0	1	2	4	3	0	0	0	0	0	0	1	1	2	1	0	0	0	0	0	0	1	1	2	1	4.9	2.4	2.4	81.733	735	735;614;697;486;504	2
Q60930;G3UX26;D3YZT5;A0A286YCR8	Q60930;G3UX26;D3YZT5;A0A286YCR8	7;7;4;4	7;7;4;4	7;7;4;4	Voltage-dependent anion-selective channel protein 2	Vdac2	sp|Q60930|VDAC2_MOUSE Voltage-dependent anion-selective channel protein 2 OS=Mus musculus OX=10090 GN=Vdac2 PE=1 SV=2;tr|G3UX26|G3UX26_MOUSE Outer mitochondrial membrane protein porin 2 OS=Mus musculus OX=10090 GN=Vdac2 PE=1 SV=1;tr|D3YZT5|D3YZT5_MOUSE Out	4	7	7	7	1	0	7	2	1	0	3	2	1	0	1	0	7	2	1	0	3	2	1	0	1	0	7	2	1	0	3	2	1	0	30.2	30.2	30.2	31.732	295	295;283;201;246	4.18
Q9D7G0;G3UXL2;Q9CS42	Q9D7G0;G3UXL2;Q9CS42	3;3;2	3;3;2	3;3;2	Ribose-phosphate pyrophosphokinase 1;Ribose-phosphate pyrophosphokinase 2	Prps1;Prps1l3;Prps2	sp|Q9D7G0|PRPS1_MOUSE Ribose-phosphate pyrophosphokinase 1 OS=Mus musculus OX=10090 GN=Prps1 PE=1 SV=4;tr|G3UXL2|G3UXL2_MOUSE Ribose-phosphate diphosphokinase OS=Mus musculus OX=10090 GN=Prps1l3 PE=3 SV=1;sp|Q9CS42|PRPS2_MOUSE Ribose-phosphate pyrophosphok	3	3	3	3	0	0	0	0	0	0	2	3	0	0	0	0	0	0	0	0	2	3	0	0	0	0	0	0	0	0	2	3	0	0	10.7	10.7	10.7	34.834	318	318;318;318	4.4
P24860;Q68EM3;G3UY65	P24860;Q68EM3;G3UY65	1;1;1	1;1;1	1;1;1	G2/mitotic-specific cyclin-B1	Ccnb1	sp|P24860|CCNB1_MOUSE G2/mitotic-specific cyclin-B1 OS=Mus musculus OX=10090 GN=Ccnb1 PE=1 SV=3;tr|Q68EM3|Q68EM3_MOUSE Ccnb1 protein OS=Mus musculus OX=10090 GN=Ccnb1 PE=1 SV=1;tr|G3UY65|G3UY65_MOUSE G2/mitotic-specific cyclin-B1 OS=Mus musculus OX=10090 G	3	1	1	1	0	0	0	0	0	0	0	1	0	0	0	0	0	0	0	0	0	1	0	0	0	0	0	0	0	0	0	1	0	0	3.7	3.7	3.7	48.051	430	430;369;393	3
Q9WV18;G3UZ52	Q9WV18;G3UZ52	1;1	1;1	1;1	Gamma-aminobutyric acid type B receptor subunit 1	Gabbr1	sp|Q9WV18|GABR1_MOUSE Gamma-aminobutyric acid type B receptor subunit 1 OS=Mus musculus OX=10090 GN=Gabbr1 PE=1 SV=1;tr|G3UZ52|G3UZ52_MOUSE Gamma-aminobutyric acid type B receptor subunit 1 (Fragment) OS=Mus musculus OX=10090 GN=Gabbr1 PE=1 SV=1	2	1	1	1	0	0	1	0	0	0	0	0	0	0	0	0	1	0	0	0	0	0	0	0	0	0	1	0	0	0	0	0	0	0	2.2	2.2	2.2	108.21	960	960;213	1.5	1
P99029;G3UZJ4;A0A494BAZ4;H3BJQ7	P99029;G3UZJ4;A0A494BAZ4;H3BJQ7	3;3;2;2	3;3;2;2	3;3;2;2	Peroxiredoxin-5, mitochondrial	Prdx5	sp|P99029|PRDX5_MOUSE Peroxiredoxin-5, mitochondrial OS=Mus musculus OX=10090 GN=Prdx5 PE=1 SV=2;tr|G3UZJ4|G3UZJ4_MOUSE Thioredoxin-dependent peroxiredoxin OS=Mus musculus OX=10090 GN=Prdx5 PE=1 SV=1;tr|A0A494BAZ4|A0A494BAZ4_MOUSE Peroxiredoxin-5 (Fragment	4	3	3	3	0	0	1	0	0	0	0	2	0	1	0	0	1	0	0	0	0	2	0	1	0	0	1	0	0	0	0	2	0	1	21.9	21.9	21.9	21.897	210	210;166;142;213	5
Q3TCR7;G3X9G4;P39054;Q3T9X3;F8WIV5;G3UZZ3;G3UXX2;G3UY64	Q3TCR7;G3X9G4;P39054;Q3T9X3;F8WIV5;G3UZZ3	8;8;7;7;7;6;3;1	1;1;1;1;1;1;0;0	1;1;1;1;1;1;0;0	Dynamin-2	Dnm2	tr|Q3TCR7|Q3TCR7_MOUSE Dynamin GTPase OS=Mus musculus OX=10090 GN=Dnm2 PE=1 SV=1;tr|G3X9G4|G3X9G4_MOUSE Dynamin GTPase OS=Mus musculus OX=10090 GN=Dnm2 PE=1 SV=1;sp|P39054|DYN2_MOUSE Dynamin-2 OS=Mus musculus OX=10090 GN=Dnm2 PE=1 SV=2;tr|Q3T9X3|Q3T9X3_MOU	8	8	1	1	1	1	1	8	2	1	2	4	3	3	0	0	1	1	1	1	0	1	0	0	0	0	1	1	1	1	0	1	0	0	9.3	1.2	1.2	97.986	869	869;870;870;860;870;807;248;69	2.22	1
G5E829;A0A1W2P7C7;A0A1W2P6X7;A0A1W2P7R3;A0A1W2P867	G5E829	29;8;5;3;2	29;8;5;3;2	12;5;0;3;2	Plasma membrane calcium-transporting ATPase 1	Atp2b1	sp|G5E829|AT2B1_MOUSE Plasma membrane calcium-transporting ATPase 1 OS=Mus musculus OX=10090 GN=Atp2b1 PE=1 SV=1	5	29	29	12	3	5	17	9	3	2	20	20	8	18	3	5	17	9	3	2	20	20	8	18	1	2	8	5	2	0	8	9	3	7	27.4	27.4	12.7	134.75	1220	1220;430;245;212;175	1.14	117
G5E863;E9PX01	G5E863	21;9	13;9	0;0		Gria4	tr|G5E863|G5E863_MOUSE Glutamate receptor OS=Mus musculus OX=10090 GN=Gria4 PE=1 SV=1	2	21	13	0	0	1	7	6	1	0	15	19	20	19	0	0	0	0	0	0	7	11	12	12	0	0	0	0	0	0	0	0	0	0	25.5	14.7	0	100.82	902	902;433	1.9	5
G5E8H1	G5E8H1	47	1	0		Gria2	tr|G5E8H1|G5E8H1_MOUSE Glutamate receptor OS=Mus musculus OX=10090 GN=Gria2 PE=1 SV=1	1	47	1	0	0	5	39	29	3	0	46	45	40	45	0	0	1	1	0	0	1	1	1	1	0	0	0	0	0	0	0	0	0	0	49.3	1	0	98.76	883	883	1.77	6
Q8VEM8;G5E902	Q8VEM8;G5E902	8;8	8;8	8;8	Phosphate carrier protein, mitochondrial	Slc25a3	sp|Q8VEM8|MPCP_MOUSE Phosphate carrier protein, mitochondrial OS=Mus musculus OX=10090 GN=Slc25a3 PE=1 SV=1;tr|G5E902|G5E902_MOUSE Phosphate carrier protein, mitochondrial OS=Mus musculus OX=10090 GN=Slc25a3 PE=1 SV=1	2	8	8	8	0	4	5	2	1	0	8	8	7	5	0	4	5	2	1	0	8	8	7	5	0	4	5	2	1	0	8	8	7	5	23	23	23	39.632	357	357;358	4.54	4
Q8R081;G5E924;G3UY38	Q8R081;G5E924;G3UY38	4;4;3	4;4;3	4;4;3	Heterogeneous nuclear ribonucleoprotein L	Hnrnpl	sp|Q8R081|HNRPL_MOUSE Heterogeneous nuclear ribonucleoprotein L OS=Mus musculus OX=10090 GN=Hnrnpl PE=1 SV=2;tr|G5E924|G5E924_MOUSE Heterogeneous nuclear ribonucleoprotein L (Fragment) OS=Mus musculus OX=10090 GN=Hnrnpl PE=1 SV=1;tr|G3UY38|G3UY38_MOUSE Het	3	4	4	4	0	0	4	0	0	0	0	0	0	0	0	0	4	0	0	0	0	0	0	0	0	0	4	0	0	0	0	0	0	0	13	13	13	63.963	586	586;615;456	2
Q9DBG3;H3BKM0;H3BIY9;O35643;Q5SVG5;Q5SVG4;Q5SWR0;H3BJ06	Q9DBG3;H3BKM0;H3BIY9;O35643;Q5SVG5;Q5SVG4	12;12;12;7;7;7;1;1	12;12;12;7;7;7;1;1	12;12;12;7;7;7;1;1	AP-2 complex subunit beta;AP complex subunit beta;AP-1 complex subunit beta-1	Ap2b1;Ap1b1	sp|Q9DBG3|AP2B1_MOUSE AP-2 complex subunit beta OS=Mus musculus OX=10090 GN=Ap2b1 PE=1 SV=1;tr|H3BKM0|H3BKM0_MOUSE AP complex subunit beta OS=Mus musculus OX=10090 GN=Ap2b1 PE=1 SV=1;tr|H3BIY9|H3BIY9_MOUSE AP complex subunit beta OS=Mus musculus OX=10090 G	8	12	12	12	1	2	5	8	1	0	3	6	4	6	1	2	5	8	1	0	3	6	4	6	1	2	5	8	1	0	3	6	4	6	16.5	16.5	16.5	104.58	937	937;913;942;943;916;923;44;199	1.79	10
P62874;H3BKR2;H3BLF7	P62874;H3BKR2;H3BLF7	8;8;7	8;8;7	5;5;4	Guanine nucleotide-binding protein G(I)/G(S)/G(T) subunit beta-1	Gnb1	sp|P62874|GBB1_MOUSE Guanine nucleotide-binding protein G(I)/G(S)/G(T) subunit beta-1 OS=Mus musculus OX=10090 GN=Gnb1 PE=1 SV=3;tr|H3BKR2|H3BKR2_MOUSE Guanine nucleotide-binding protein G(I)/G(S)/G(T) subunit beta-1 (Fragment) OS=Mus musculus OX=10090 GN=	3	8	8	5	1	1	5	3	2	1	5	5	4	4	1	1	5	3	2	1	5	5	4	4	1	1	3	2	1	1	3	2	2	2	22.9	22.9	13.5	37.377	340	340;273;108	4.06
P17751;H7BXC3	P17751;H7BXC3	2;2	2;2	2;2	Triosephosphate isomerase	Tpi1	sp|P17751|TPIS_MOUSE Triosephosphate isomerase OS=Mus musculus OX=10090 GN=Tpi1 PE=1 SV=5;tr|H7BXC3|H7BXC3_MOUSE Triosephosphate isomerase OS=Mus musculus OX=10090 GN=Tpi1 PE=1 SV=1	2	2	2	2	0	2	0	0	0	0	1	2	1	1	0	2	0	0	0	0	1	2	1	1	0	2	0	0	0	0	1	2	1	1	17.7	17.7	17.7	26.712	249	249;167	5
P83093;I1E4X8;F6WBP9	P83093;I1E4X8;F6WBP9	4;4;2	4;4;2	4;4;2	Stromal interaction molecule 2	Stim2	sp|P83093|STIM2_MOUSE Stromal interaction molecule 2 OS=Mus musculus OX=10090 GN=Stim2 PE=1 SV=2;tr|I1E4X8|I1E4X8_MOUSE Stromal interaction molecule 2 OS=Mus musculus OX=10090 GN=Stim2 PE=1 SV=1;tr|F6WBP9|F6WBP9_MOUSE Stromal interaction molecule 2 (Fragme	3	4	4	4	0	0	3	2	0	0	0	0	0	0	0	0	3	2	0	0	0	0	0	0	0	0	3	2	0	0	0	0	0	0	6.2	6.2	6.2	83.924	746	746;754;384	1.62	3
Q80TJ1;K4DI76;J3QJW3;A0A286YE00	Q80TJ1;K4DI76;J3QJW3;A0A286YE00	4;4;4;3	4;4;4;3	4;4;4;3	Calcium-dependent secretion activator 1	Cadps	sp|Q80TJ1|CAPS1_MOUSE Calcium-dependent secretion activator 1 OS=Mus musculus OX=10090 GN=Cadps PE=1 SV=3;tr|K4DI76|K4DI76_MOUSE Calcium-dependent secretion activator 1 OS=Mus musculus OX=10090 GN=Cadps PE=1 SV=1;tr|J3QJW3|J3QJW3_MOUSE Calcium-dependent se	4	4	4	4	0	1	0	0	0	0	0	3	1	4	0	1	0	0	0	0	0	3	1	4	0	1	0	0	0	0	0	3	1	4	3.2	3.2	3.2	153.11	1355	1355;1354;1356;402	1	9
Q60931;J3QMG3	Q60931;J3QMG3	2;2	2;2	2;2	Voltage-dependent anion-selective channel protein 3	Vdac3	sp|Q60931|VDAC3_MOUSE Voltage-dependent anion-selective channel protein 3 OS=Mus musculus OX=10090 GN=Vdac3 PE=1 SV=1;tr|J3QMG3|J3QMG3_MOUSE Voltage-dependent anion-selective channel protein 3 OS=Mus musculus OX=10090 GN=Vdac3 PE=1 SV=1	2	2	2	2	0	1	2	0	0	0	1	1	1	1	0	1	2	0	0	0	1	1	1	1	0	1	2	0	0	0	1	1	1	1	11	11	11	30.752	283	283;284	5
J3QPE5	J3QPE5	1	1	1		Gm5849	tr|J3QPE5|J3QPE5_MOUSE Predicted gene 5849 OS=Mus musculus OX=10090 GN=Gm5849 PE=4 SV=2	1	1	1	1	0	0	0	0	0	0	0	0	0	1	0	0	0	0	0	0	0	0	0	1	0	0	0	0	0	0	0	0	0	1	15.4	15.4	15.4	13.547	117	117	4
Q9Z1G4;K3W4T3;A2A599	Q9Z1G4;K3W4T3	5;5;1	5;5;1	5;5;1	V-type proton ATPase 116 kDa subunit a isoform 1;V-type proton ATPase subunit a	Atp6v0a1	sp|Q9Z1G4|VPP1_MOUSE V-type proton ATPase 116 kDa subunit a1 OS=Mus musculus OX=10090 GN=Atp6v0a1 PE=1 SV=3;tr|K3W4T3|K3W4T3_MOUSE V-type proton ATPase subunit a OS=Mus musculus OX=10090 GN=Atp6v0a1 PE=1 SV=1	3	5	5	5	0	0	0	0	0	0	3	5	1	2	0	0	0	0	0	0	3	5	1	2	0	0	0	0	0	0	3	5	1	2	6.9	6.9	6.9	96.466	839	839;838;79	1.92	1
Q99N28;K4DI58	Q99N28;K4DI58	1;1	1;1	1;1	Cell adhesion molecule 3	Cadm3	sp|Q99N28|CADM3_MOUSE Cell adhesion molecule 3 OS=Mus musculus OX=10090 GN=Cadm3 PE=1 SV=1;tr|K4DI58|K4DI58_MOUSE Cell adhesion molecule 3 OS=Mus musculus OX=10090 GN=Cadm3 PE=1 SV=1	2	1	1	1	0	0	0	0	0	0	0	1	0	1	0	0	0	0	0	0	0	1	0	1	0	0	0	0	0	0	0	1	0	1	4.5	4.5	4.5	42.964	396	396;430	3
Q80SU7;L7N451	Q80SU7;L7N451	1;1	1;1	1;1	Interferon-induced very large GTPase 1	Gvin1	sp|Q80SU7|GVIN1_MOUSE Interferon-induced very large GTPase 1 OS=Mus musculus OX=10090 GN=Gvin1 PE=1 SV=1;tr|L7N451|L7N451_MOUSE Interferon-induced very large GTPase 1 OS=Mus musculus OX=10090 GN=Gvin1 PE=1 SV=1	2	1	1	1	0	0	0	1	0	0	0	0	0	0	0	0	0	1	0	0	0	0	0	0	0	0	0	1	0	0	0	0	0	0	0.5	0.5	0.5	280.81	2427	2427;2427	5
O08553	O08553	33	33	29	Dihydropyrimidinase-related protein 2	Dpysl2	sp|O08553|DPYL2_MOUSE Dihydropyrimidinase-related protein 2 OS=Mus musculus OX=10090 GN=Dpysl2 PE=1 SV=2	1	33	33	29	3	8	33	9	14	8	12	17	11	15	3	8	33	9	14	8	12	17	11	15	2	6	29	7	11	7	10	14	9	12	71.9	71.9	62.1	62.277	572	572	2.36	33
O08599;A0A140LHJ4	O08599	17;5	17;5	17;5	Syntaxin-binding protein 1	Stxbp1	sp|O08599|STXB1_MOUSE Syntaxin-binding protein 1 OS=Mus musculus OX=10090 GN=Stxbp1 PE=1 SV=2	2	17	17	17	1	4	3	1	0	3	10	16	4	8	1	4	3	1	0	3	10	16	4	8	1	4	3	1	0	3	10	16	4	8	33.2	33.2	33.2	67.568	594	594;100	2.07	1
O08749	O08749	6	6	6	Dihydrolipoyl dehydrogenase, mitochondrial	Dld	sp|O08749|DLDH_MOUSE Dihydrolipoyl dehydrogenase, mitochondrial OS=Mus musculus OX=10090 GN=Dld PE=1 SV=2	1	6	6	6	5	2	0	0	0	0	4	6	2	4	5	2	0	0	0	0	4	6	2	4	5	2	0	0	0	0	4	6	2	4	17.1	17.1	17.1	54.272	509	509	2.93
O08917;G3UYU4;G3UZZ5;G3UWW8;G3XA73	O08917;G3UYU4	23;21;8;8;1	23;21;8;8;1	23;21;8;8;1	Flotillin-1	Flot1	sp|O08917|FLOT1_MOUSE Flotillin-1 OS=Mus musculus OX=10090 GN=Flot1 PE=1 SV=1;tr|G3UYU4|G3UYU4_MOUSE Flotillin OS=Mus musculus OX=10090 GN=Flot1 PE=1 SV=1	5	23	23	23	20	22	0	0	0	0	21	13	20	16	20	22	0	0	0	0	21	13	20	16	20	22	0	0	0	0	21	13	20	16	63.6	63.6	63.6	47.513	428	428;380;192;196;40	3.05	22
O35129;F6Q8V7;F6QPR1	O35129;F6Q8V7;F6QPR1	8;5;5	8;5;5	8;5;5	Prohibitin-2	Phb2	sp|O35129|PHB2_MOUSE Prohibitin-2 OS=Mus musculus OX=10090 GN=Phb2 PE=1 SV=1;tr|F6Q8V7|F6Q8V7_MOUSE Prohibitin (Fragment) OS=Mus musculus OX=10090 GN=Phb2 PE=1 SV=1;tr|F6QPR1|F6QPR1_MOUSE Prohibitin (Fragment) OS=Mus musculus OX=10090 GN=Phb2 PE=1 SV=1	3	8	8	8	1	2	0	0	1	0	1	8	1	1	1	2	0	0	1	0	1	8	1	1	1	2	0	0	1	0	1	8	1	1	31.4	31.4	31.4	33.296	299	299;104;157	4.2
O35449	O35449	4	4	4	Proline-rich transmembrane protein 1	Prrt1	sp|O35449|PRRT1_MOUSE Proline-rich transmembrane protein 1 OS=Mus musculus OX=10090 GN=Prrt1 PE=1 SV=1	1	4	4	4	0	1	4	4	3	2	4	3	2	3	0	1	4	4	3	2	4	3	2	3	0	1	4	4	3	2	4	3	2	3	22.9	22.9	22.9	31.389	306	306	3.52	14
O35526;D6RFB9	O35526;D6RFB9	4;3	3;2	3;2	Syntaxin-1A	Stx1a	sp|O35526|STX1A_MOUSE Syntaxin-1A OS=Mus musculus OX=10090 GN=Stx1a PE=1 SV=3;tr|D6RFB9|D6RFB9_MOUSE Syntaxin-1A OS=Mus musculus OX=10090 GN=Stx1a PE=1 SV=1	2	4	3	3	0	0	1	1	0	0	0	3	1	3	0	0	1	1	0	0	0	2	0	2	0	0	1	1	0	0	0	2	0	2	17.4	14.2	14.2	33.054	288	288;256	4.33
P70333;O35737;Q8C2Q7	P70333;O35737;Q8C2Q7	2;2;2	2;2;2	2;2;2	Heterogeneous nuclear ribonucleoprotein H2;Heterogeneous nuclear ribonucleoprotein H;Heterogeneous nuclear ribonucleoprotein H, N-terminally processed	Hnrnph2;Hnrnph1	sp|P70333|HNRH2_MOUSE Heterogeneous nuclear ribonucleoprotein H2 OS=Mus musculus OX=10090 GN=Hnrnph2 PE=1 SV=1;sp|O35737|HNRH1_MOUSE Heterogeneous nuclear ribonucleoprotein H OS=Mus musculus OX=10090 GN=Hnrnph1 PE=1 SV=3;tr|Q8C2Q7|Q8C2Q7_MOUSE Heterogeneou	3	2	2	2	0	1	1	0	0	0	0	0	0	1	0	1	1	0	0	0	0	0	0	1	0	1	1	0	0	0	0	0	0	1	7.3	7.3	7.3	49.279	449	449;449;472	3.5
O54774	O54774	4	4	4	AP-3 complex subunit delta-1	Ap3d1	sp|O54774|AP3D1_MOUSE AP-3 complex subunit delta-1 OS=Mus musculus OX=10090 GN=Ap3d1 PE=1 SV=1	1	4	4	4	1	0	1	0	0	0	3	0	1	4	1	0	1	0	0	0	3	0	1	4	1	0	1	0	0	0	3	0	1	4	3.7	3.7	3.7	135.08	1199	1199	1	10
O54983	O54983	6	6	6	Ketimine reductase mu-crystallin	Crym	sp|O54983|CRYM_MOUSE Ketimine reductase mu-crystallin OS=Mus musculus OX=10090 GN=Crym PE=1 SV=1	1	6	6	6	0	0	3	3	0	0	2	2	1	2	0	0	3	3	0	0	2	2	1	2	0	0	3	3	0	0	2	2	1	2	33.5	33.5	33.5	33.523	313	313	4
O54991	O54991	6	6	6	Contactin-associated protein 1	Cntnap1	sp|O54991|CNTP1_MOUSE Contactin-associated protein 1 OS=Mus musculus OX=10090 GN=Cntnap1 PE=1 SV=2	1	6	6	6	0	1	0	0	0	0	1	1	5	3	0	1	0	0	0	0	1	1	5	3	0	1	0	0	0	0	1	1	5	3	6.3	6.3	6.3	156.31	1385	1385	1	12
O55042	O55042	5	5	4	Alpha-synuclein	Snca	sp|O55042|SYUA_MOUSE Alpha-synuclein OS=Mus musculus OX=10090 GN=Snca PE=1 SV=2	1	5	5	4	3	4	0	0	0	0	3	2	1	2	3	4	0	0	0	0	3	2	1	2	3	3	0	0	0	0	2	2	1	1	44.3	44.3	37.9	14.485	140	140	5
O55100	O55100	2	2	2	Synaptogyrin-1	Syngr1	sp|O55100|SNG1_MOUSE Synaptogyrin-1 OS=Mus musculus OX=10090 GN=Syngr1 PE=1 SV=2	1	2	2	2	0	1	0	0	0	0	2	2	0	0	0	1	0	0	0	0	2	2	0	0	0	1	0	0	0	0	2	2	0	0	10.3	10.3	10.3	25.652	234	234	5
O55125;Q5SVG6	O55125	4;1	4;1	4;1	Protein NipSnap homolog 1	Nipsnap1	sp|O55125|NIPS1_MOUSE Protein NipSnap homolog 1 OS=Mus musculus OX=10090 GN=Nipsnap1 PE=1 SV=1	2	4	4	4	2	3	0	0	0	0	3	3	4	1	2	3	0	0	0	0	3	3	4	1	2	3	0	0	0	0	3	3	4	1	16.9	16.9	16.9	33.363	284	284;136	5
O55126;Q7TMG8;A0A0G2JEV1	O55126;Q7TMG8	3;3;1	3;3;1	3;3;1	Protein NipSnap homolog 2	Gbas	sp|O55126|NIPS2_MOUSE Protein NipSnap homolog 2 OS=Mus musculus OX=10090 GN=Nipsnap2 PE=1 SV=1;tr|Q7TMG8|Q7TMG8_MOUSE Glioblastoma amplified sequence OS=Mus musculus OX=10090 GN=Nipsnap2 PE=1 SV=1	3	3	3	3	1	2	0	0	0	0	1	1	1	2	1	2	0	0	0	0	1	1	1	2	1	2	0	0	0	0	1	1	1	2	10.7	10.7	10.7	32.932	281	281;281;111	5
O55143;Q8R429	O55143	10;4	10;4	10;4	Sarcoplasmic/endoplasmic reticulum calcium ATPase 2	Atp2a2	sp|O55143|AT2A2_MOUSE Sarcoplasmic/endoplasmic reticulum calcium ATPase 2 OS=Mus musculus OX=10090 GN=Atp2a2 PE=1 SV=2	2	10	10	10	0	0	3	1	0	0	3	9	0	4	0	0	3	1	0	0	3	9	0	4	0	0	3	1	0	0	3	9	0	4	11.5	11.5	11.5	114.86	1044	1044;994	1.24	19
O55187	O55187	1	1	1	E3 SUMO-protein ligase CBX4	Cbx4	sp|O55187|CBX4_MOUSE E3 SUMO-protein ligase CBX4 OS=Mus musculus OX=10090 GN=Cbx4 PE=1 SV=2	1	1	1	1	1	0	0	0	0	0	1	0	0	0	1	0	0	0	0	0	1	0	0	0	1	0	0	0	0	0	1	0	0	0	3.6	3.6	3.6	60.522	551	551	3.5
O70439;Q8BH40	O70439;Q8BH40	1;1	1;1	1;1	Syntaxin-7	Stx7	sp|O70439|STX7_MOUSE Syntaxin-7 OS=Mus musculus OX=10090 GN=Stx7 PE=1 SV=3;tr|Q8BH40|Q8BH40_MOUSE Syntaxin-7 OS=Mus musculus OX=10090 GN=Stx7 PE=1 SV=1	2	1	1	1	0	0	0	0	0	0	0	1	0	0	0	0	0	0	0	0	0	1	0	0	0	0	0	0	0	0	0	1	0	0	5.7	5.7	5.7	29.82	261	261;261	4
O70443	O70443	5	5	5	Guanine nucleotide-binding protein G(z) subunit alpha	Gnaz	sp|O70443|GNAZ_MOUSE Guanine nucleotide-binding protein G(z) subunit alpha OS=Mus musculus OX=10090 GN=Gnaz PE=1 SV=4	1	5	5	5	0	0	0	1	0	0	5	4	2	3	0	0	0	1	0	0	5	4	2	3	0	0	0	1	0	0	5	4	2	3	19.2	19.2	19.2	40.849	355	355	4
O70445	O70445	1	1	1	BRCA1-associated RING domain protein 1	Bard1	sp|O70445|BARD1_MOUSE BRCA1-associated RING domain protein 1 OS=Mus musculus OX=10090 GN=Bard1 PE=2 SV=1	1	1	1	1	0	0	0	0	0	0	0	0	1	0	0	0	0	0	0	0	0	0	1	0	0	0	0	0	0	0	0	0	1	0	2.4	2.4	2.4	84.253	765	765	3
O88569;A0A0N4SUM2	O88569;A0A0N4SUM2	4;2	4;2	4;2	Heterogeneous nuclear ribonucleoproteins A2/B1	Hnrnpa2b1	sp|O88569|ROA2_MOUSE Heterogeneous nuclear ribonucleoproteins A2/B1 OS=Mus musculus OX=10090 GN=Hnrnpa2b1 PE=1 SV=2;tr|A0A0N4SUM2|A0A0N4SUM2_MOUSE Heterogeneous nuclear ribonucleoproteins A2/B1 (Fragment) OS=Mus musculus OX=10090 GN=Hnrnpa2b1 PE=1 SV=1	2	4	4	4	0	1	2	1	0	0	0	2	2	4	0	1	2	1	0	0	0	2	2	4	0	1	2	1	0	0	0	2	2	4	14.2	14.2	14.2	37.402	353	353;155	4
O88602;S4R2R7	O88602	5;2	3;0	3;0	Voltage-dependent calcium channel gamma-2 subunit	Cacng2	sp|O88602|CCG2_MOUSE Voltage-dependent calcium channel gamma-2 subunit OS=Mus musculus OX=10090 GN=Cacng2 PE=1 SV=1	2	5	3	3	0	1	2	1	0	0	5	5	4	5	0	1	1	1	0	0	3	3	3	3	0	1	1	1	0	0	3	3	3	3	19.5	15.5	15.5	35.894	323	323;186	3.05	15
O88737	O88737	2	2	2	Protein bassoon	Bsn	sp|O88737|BSN_MOUSE Protein bassoon OS=Mus musculus OX=10090 GN=Bsn PE=1 SV=4	1	2	2	2	0	0	0	2	0	0	0	0	0	0	0	0	0	2	0	0	0	0	0	0	0	0	0	2	0	0	0	0	0	0	0.9	0.9	0.9	418.84	3942	3942	1	2
O88741	O88741	2	2	2	Ganglioside-induced differentiation-associated protein 1	Gdap1	sp|O88741|GDAP1_MOUSE Ganglioside-induced differentiation-associated protein 1 OS=Mus musculus OX=10090 GN=Gdap1 PE=1 SV=1	1	2	2	2	0	0	0	0	0	0	0	2	0	0	0	0	0	0	0	0	0	2	0	0	0	0	0	0	0	0	0	2	0	0	9.5	9.5	9.5	41.31	358	358	4
O88935	O88935	12	12	11	Synapsin-1	Syn1	sp|O88935|SYN1_MOUSE Synapsin-1 OS=Mus musculus OX=10090 GN=Syn1 PE=1 SV=2	1	12	12	11	4	5	0	2	2	1	5	10	7	7	4	5	0	2	2	1	5	10	7	7	4	5	0	2	2	1	5	9	7	7	31.9	31.9	29.6	74.096	706	706	2.29
O89053;G3UYK8;A0A0U1RPY8;D3YW57;G3UX53;D3YXM2	O89053;G3UYK8	9;6;4;2;1;1	9;6;4;2;1;1	9;6;4;2;1;1	Coronin-1A;Coronin	Coro1a	sp|O89053|COR1A_MOUSE Coronin-1A OS=Mus musculus OX=10090 GN=Coro1a PE=1 SV=5;tr|G3UYK8|G3UYK8_MOUSE Coronin OS=Mus musculus OX=10090 GN=Coro1a PE=1 SV=1	6	9	9	9	0	0	0	0	0	0	0	1	5	9	0	0	0	0	0	0	0	1	5	9	0	0	0	0	0	0	0	1	5	9	24.7	24.7	24.7	50.989	461	461;389;246;233;113;116	3
P00405	P00405	3	3	3	Cytochrome c oxidase subunit 2	Mtco2	sp|P00405|COX2_MOUSE Cytochrome c oxidase subunit 2 OS=Mus musculus OX=10090 GN=Mtco2 PE=1 SV=1	1	3	3	3	0	3	1	0	0	1	3	3	3	3	0	3	1	0	0	1	3	3	3	3	0	3	1	0	0	1	3	3	3	3	20.3	20.3	20.3	25.976	227	227	5
P00688;P00687	P00688;P00687	1;1	1;1	1;1	Pancreatic alpha-amylase;Alpha-amylase 1	Amy2;Amy1	sp|P00688|AMYP_MOUSE Pancreatic alpha-amylase OS=Mus musculus OX=10090 GN=Amy2 PE=1 SV=2;sp|P00687|AMY1_MOUSE Alpha-amylase 1 OS=Mus musculus OX=10090 GN=Amy1 PE=1 SV=2	2	1	1	1	0	1	0	0	0	0	0	0	0	0	0	1	0	0	0	0	0	0	0	0	0	1	0	0	0	0	0	0	0	0	3	3	3	57.318	508	508;511	2.5	1
P01027;H3BL60	P01027	13;2	13;2	8;0	Complement C3;Complement C3 beta chain;C3-beta-c;Complement C3 alpha chain;C3a anaphylatoxin;Acylation stimulating protein;Complement C3b alpha chain;Complement C3c alpha chain fragment 1;Complement C3dg fragment;Complement C3g fragment;Complement C3d fragment;Complement C3f fragment;Complement C3c alpha chain fragment 2	C3	sp|P01027|CO3_MOUSE Complement C3 OS=Mus musculus OX=10090 GN=C3 PE=1 SV=3	2	13	13	8	0	0	7	3	6	9	3	2	1	2	0	0	7	3	6	9	3	2	1	2	0	0	4	3	4	6	1	1	1	2	6.8	6.8	3.8	186.48	1663	1663;102	1.82	23
P01635	P01635	2	1	0	Ig kappa chain V-V region K2		sp|P01635|KV5A3_MOUSE Ig kappa chain V-V region K2 (Fragment) OS=Mus musculus OX=10090 PE=1 SV=1	1	2	1	0	1	2	2	1	2	1	2	1	2	2	1	1	1	0	1	1	1	1	1	1	0	0	0	0	0	0	0	0	0	0	20	8.7	0	12.581	115	115	4.9
P01642	P01642	1	1	1	Ig kappa chain V-V region L7	Gm10881	sp|P01642|KV5A9_MOUSE Ig kappa chain V-V region L7 (Fragment) OS=Mus musculus OX=10090 GN=Gm10881 PE=1 SV=1	1	1	1	1	0	1	0	0	0	0	0	1	0	0	0	1	0	0	0	0	0	1	0	0	0	1	0	0	0	0	0	1	0	0	10.4	10.4	10.4	12.615	115	115	5
P03977;P01656;P01654;P01655;A0A075B5N9;A0A075B5P0;P01668;P01672;P01670;P01669;P01667;P01666;P01665;P01664;P01659	P03977;P01656;P01654;P01655;A0A075B5N9;A0A075B5P0;P01668;P01672;P01670;P01669;P01667;P01666;P01665;P01664;P01659	2;2;2;2;1;1;1;1;1;1;1;1;1;1;1	1;1;1;1;0;1;0;0;0;0;0;0;0;0;0	1;1;1;1;0;1;0;0;0;0;0;0;0;0;0	Ig kappa chain V-III region 50S10.1;Ig kappa chain V-III region MOPC 70;Ig kappa chain V-III region PC 2880/PC 1229;Ig kappa chain V-III region PC 7132;Ig kappa chain V-III region PC 7210;Ig kappa chain V-III region PC 7940;Ig kappa chain V-III region PC 6684;Ig kappa chain V-III region PC 7769;Ig kappa chain V-III region PC 6308;Ig kappa chain V-III region PC 7183;Ig kappa chain V-III region PC …	Igkv3-7;Igkv3-2	sp|P03977|KV3A4_MOUSE Ig kappa chain V-III region 50S10.1 OS=Mus musculus OX=10090 PE=1 SV=1;sp|P01656|KV3A3_MOUSE Ig kappa chain V-III region MOPC 70 OS=Mus musculus OX=10090 PE=1 SV=1;sp|P01654|KV3A1_MOUSE Ig kappa chain V-III region PC 2880/PC 1229 OS=M	15	2	1	1	0	2	1	1	0	1	1	2	0	1	0	1	0	0	0	0	0	1	0	0	0	1	0	0	0	0	0	1	0	0	30.6	14.4	14.4	12.042	111	111;111;111;112;99;119;110;111;111;111;111;111;111;111;112	5
P01657;A0A075B5N2;A0A140T8P2;A0A0G2JEI6;A0A075B5N1;A0A0G2JDJ8;P01632;P01634	P01657;A0A075B5N2;A0A140T8P2;A0A0G2JEI6;A0A075B5N1;A0A0G2JDJ8;P01632;P01634	2;1;1;1;1;1;1;1	2;1;1;1;1;1;1;1	1;1;1;1;1;1;1;1	Ig kappa chain V-III region PC 2413;Ig kappa chain V-I region S107A;Ig kappa chain V-V region MOPC 21	Igkv6-29;Igkv7-33	sp|P01657|KV3A5_MOUSE Ig kappa chain V-III region PC 2413 OS=Mus musculus OX=10090 PE=1 SV=1;tr|A0A075B5N2|A0A075B5N2_MOUSE Immunoglobulin kappa chain variable 6-29 OS=Mus musculus OX=10090 GN=Igkv6-29 PE=4 SV=7;tr|A0A140T8P2|A0A140T8P2_MOUSE Immunoglobuli	8	2	2	1	0	2	1	1	0	1	2	2	1	1	0	2	1	1	0	1	2	2	1	1	0	1	0	0	0	0	1	1	1	0	24.3	24.3	8.1	11.949	111	111;114;115;115;120;121;114;136	5
P01660;A0A140T8M6	P01660;A0A140T8M6	2;1	1;1	1;1	Ig kappa chain V-III region PC 3741/TEPC 111		sp|P01660|KV3A8_MOUSE Ig kappa chain V-III region PC 3741/TEPC 111 OS=Mus musculus OX=10090 PE=1 SV=1;tr|A0A140T8M6|A0A140T8M6_MOUSE Immunoglobulin kappa chain variable 3-5 (Fragment) OS=Mus musculus OX=10090 GN=Igkv3-5 PE=4 SV=2	2	2	1	1	0	1	1	1	0	1	2	2	0	2	0	0	0	0	0	0	1	1	0	1	0	0	0	0	0	0	1	1	0	1	26.1	9.9	9.9	12.099	111	111;119	5
P01679;P01678;P01677;P01676;P01675	P01679;P01678;P01677;P01676;P01675	1;1;1;1;1	1;1;1;1;1	1;1;1;1;1	Ig kappa chain V-VI region J539;Ig kappa chain V-VI region SAPC 10;Ig kappa chain V-VI region TEPC 601/TEPC 191;Ig kappa chain V-VI region XRPC 24;Ig kappa chain V-VI region XRPC 44		sp|P01679|KV6A5_MOUSE Ig kappa chain V-VI region J539 OS=Mus musculus OX=10090 PE=1 SV=1;sp|P01678|KV6A4_MOUSE Ig kappa chain V-VI region SAPC 10 OS=Mus musculus OX=10090 PE=1 SV=1;sp|P01677|KV6A3_MOUSE Ig kappa chain V-VI region TEPC 601/TEPC 191 OS=Mus m	5	1	1	1	1	1	0	1	1	0	0	1	1	1	1	1	0	1	1	0	0	1	1	1	1	1	0	1	1	0	0	1	1	1	16.8	16.8	16.8	11.502	107	107;107;107;107;107	5
P01749	P01749	2	1	1	Ig heavy chain V region 3	Ighv1-61	sp|P01749|HVM05_MOUSE Ig heavy chain V region 3 OS=Mus musculus OX=10090 GN=Ighv1-61 PE=1 SV=1	1	2	1	1	0	1	0	0	0	0	1	1	0	0	0	1	0	0	0	0	0	0	0	0	0	1	0	0	0	0	0	0	0	0	27.4	21.4	21.4	13.016	117	117	3
P06328;P01754;P06329;P01753;A0A075B5X0;A0A0A6YXE0;P01748	P06328;P01754;P06329	5;5;3;2;1;1;1	4;4;2;2;1;1;1	0;0;0;0;0;0;0	Ig heavy chain V region VH558 B4;Ig heavy chain V region 1-62-3;Ig heavy chain V region AC38 15.3	Ighv1-62-3	sp|P06328|HVM49_MOUSE Ig heavy chain V region 1-72 OS=Mus musculus OX=10090 GN=Ighv1-72 PE=1 SV=2;sp|P01754|HVM10_MOUSE Ig heavy chain V region 1-62-3 OS=Mus musculus OX=10090 GN=Ighv1-62-3 PE=4 SV=2;sp|P06329|HVM50_MOUSE Ig heavy chain V region AC38 15.3	7	5	4	0	1	1	1	0	0	1	4	5	0	2	1	1	1	0	0	1	3	4	0	2	0	0	0	0	0	0	0	0	0	0	28.2	28.2	0	12.877	117	117;117;120;117;116;117;117	2.9
P01801;P01799;P01797;P01796;P01800;P01802;P01804;P01798;P01803	P01801;P01799;P01797;P01796;P01800;P01802	5;4;4;4;3;3;2;2;2	3;2;2;2;2;2;1;1;1	2;1;1;1;1;1;0;1;0	Ig heavy chain V-III region J606;Ig heavy chain V-III region ABE-47N;Ig heavy chain V-III region U61;Ig heavy chain V-III region A4;Ig heavy chain V-III region T957;Ig heavy chain V-III region W3082		sp|P01801|HVM32_MOUSE Ig heavy chain V-III region J606 OS=Mus musculus OX=10090 PE=1 SV=1;sp|P01799|HVM30_MOUSE Ig heavy chain V-III region ABE-47N OS=Mus musculus OX=10090 PE=1 SV=1;sp|P01797|HVM28_MOUSE Ig heavy chain V-III region U61 OS=Mus musculus OX=	9	5	3	2	1	5	0	1	1	0	3	5	1	3	1	3	0	0	0	0	2	3	0	1	0	2	0	0	0	0	1	2	0	0	45.2	35.7	27.8	12.81	115	115;113;113;113;113;115;111;113;113	3.1
P01837;A0A5H1ZRK8	P01837;A0A5H1ZRK8	10;8	10;8	10;8	Ig kappa chain C region		sp|P01837|IGKC_MOUSE Immunoglobulin kappa constant OS=Mus musculus OX=10090 GN=Igkc PE=1 SV=2;tr|A0A5H1ZRK8|A0A5H1ZRK8_MOUSE Immunoglobulin kappa constant (Fragment) OS=Mus musculus OX=10090 GN=Igkc PE=1 SV=1	2	10	10	10	4	7	2	5	4	2	8	9	4	3	4	7	2	5	4	2	8	9	4	3	4	7	2	5	4	2	8	9	4	3	88.8	88.8	88.8	11.934	107	107;107	4.05	16
Q99JC1;P01844;A0A0G2JGQ8;P01845	Q99JC1;P01844;A0A0G2JGQ8;P01845	3;3;2;2	3;3;2;2	3;3;2;2	Ig lambda-2 chain C region;Ig lambda-3 chain C region	Iglc2;Iglc3	tr|Q99JC1|Q99JC1_MOUSE Ig lambda-2 chain C region (Fragment) OS=Mus musculus OX=10090 GN=Iglc2 PE=1 SV=1;sp|P01844|LAC2_MOUSE Ig lambda-2 chain C region OS=Mus musculus OX=10090 GN=Iglc2 PE=1 SV=1;tr|A0A0G2JGQ8|A0A0G2JGQ8_MOUSE Ig lambda-3 chain C region (	4	3	3	3	0	1	0	1	1	0	0	3	0	0	0	1	0	1	1	0	0	3	0	0	0	1	0	1	1	0	0	3	0	0	47.6	47.6	47.6	11.311	105	105;104;105;104	5
P01865;P01863;P84751	P01865;P01863	12;12;1	10;10;1	10;10;1	Ig gamma-2A chain C region, membrane-bound form;Ig gamma-2A chain C region, A allele	Igh-1a;Ighg	sp|P01865|GCAM_MOUSE Ig gamma-2A chain C region, membrane-bound form OS=Mus musculus OX=10090 GN=Igh-1a PE=1 SV=3;sp|P01863|GCAA_MOUSE Ig gamma-2A chain C region, A allele OS=Mus musculus OX=10090 GN=Ighg PE=1 SV=1	3	12	10	10	2	3	2	1	1	1	12	9	1	2	1	2	1	0	0	0	10	8	0	0	1	2	1	0	0	0	10	8	0	0	34.7	29.9	29.9	43.949	398	398;330;237	3.11	13
P01867	P01867	11	1	1	Ig gamma-2B chain C region	Igh-3	sp|P01867|IGG2B_MOUSE Ig gamma-2B chain C region OS=Mus musculus OX=10090 GN=Igh-3 PE=1 SV=3	1	11	1	1	7	8	3	6	5	4	6	7	6	5	0	0	0	0	0	0	1	1	0	0	0	0	0	0	0	0	1	1	0	0	36.4	4	4	44.259	404	404	3.25
P02088;P02089;P02104;CON__P02070;CON__Q3SX09	P02088;P02089	4;2;1;1;1	1;1;0;0;0	1;1;0;0;0	Hemoglobin subunit beta-1;Hemoglobin subunit beta-2	Hbb-b1;Hbb-b2	sp|P02088|HBB1_MOUSE Hemoglobin subunit beta-1 OS=Mus musculus OX=10090 GN=Hbb-b1 PE=1 SV=2;sp|P02089|HBB2_MOUSE Hemoglobin subunit beta-2 OS=Mus musculus OX=10090 GN=Hbb-b2 PE=1 SV=2	5	4	1	1	0	1	0	0	1	0	2	3	2	1	0	0	0	0	1	0	0	0	0	0	0	0	0	0	1	0	0	0	0	0	38.8	8.2	8.2	15.84	147	147;147;147;145;201	2
P03930	P03930	1	1	1	ATP synthase protein 8	Mtatp8	sp|P03930|ATP8_MOUSE ATP synthase protein 8 OS=Mus musculus OX=10090 GN=Mtatp8 PE=1 SV=1	1	1	1	1	0	0	0	0	0	0	0	1	1	0	0	0	0	0	0	0	0	1	1	0	0	0	0	0	0	0	0	1	1	0	14.9	14.9	14.9	7.7662	67	67	5
P04925	P04925	3	3	3	Major prion protein	Prnp	sp|P04925|PRIO_MOUSE Major prion protein OS=Mus musculus OX=10090 GN=Prnp PE=1 SV=2	1	3	3	3	3	2	0	0	0	0	2	1	2	1	3	2	0	0	0	0	2	1	2	1	3	2	0	0	0	0	2	1	2	1	19.7	19.7	19.7	27.977	254	254	4.69
P05063	P05063	5	5	5	Fructose-bisphosphate aldolase C	Aldoc	sp|P05063|ALDOC_MOUSE Fructose-bisphosphate aldolase C OS=Mus musculus OX=10090 GN=Aldoc PE=1 SV=4	1	5	5	5	0	0	0	0	0	0	0	5	0	4	0	0	0	0	0	0	0	5	0	4	0	0	0	0	0	0	0	5	0	4	13.5	13.5	13.5	39.394	363	363	4
P05064;D3Z510;A0A0U1RPN8;D3YWI1;A6ZI44;D3YV98;A0A0U1RPT5;Q9CPQ9;A6ZI46;A6ZI47	P05064;D3Z510;A0A0U1RPN8;D3YWI1;A6ZI44;D3YV98;A0A0U1RPT5;Q9CPQ9;A6ZI46	9;8;8;8;8;6;6;5;5;3	9;8;8;8;8;6;6;5;5;3	9;8;8;8;8;6;6;5;5;3	Fructose-bisphosphate aldolase A;Fructose-bisphosphate aldolase	Aldoa;Aldoart1	sp|P05064|ALDOA_MOUSE Fructose-bisphosphate aldolase A OS=Mus musculus OX=10090 GN=Aldoa PE=1 SV=2;tr|D3Z510|D3Z510_MOUSE Fructose-bisphosphate aldolase (Fragment) OS=Mus musculus OX=10090 GN=Aldoa PE=1 SV=2;tr|A0A0U1RPN8|A0A0U1RPN8_MOUSE Fructose-bisphosp	10	9	9	9	2	2	0	0	0	2	2	9	1	8	2	2	0	0	0	2	2	9	1	8	2	2	0	0	0	2	2	9	1	8	35.4	35.4	35.4	39.355	364	364;180;190;236;418;193;209;364;419;364	4
P05132	P05132	4	4	1	cAMP-dependent protein kinase catalytic subunit alpha	Prkaca	sp|P05132|KAPCA_MOUSE cAMP-dependent protein kinase catalytic subunit alpha OS=Mus musculus OX=10090 GN=Prkaca PE=1 SV=3	1	4	4	1	0	0	0	0	0	0	2	4	1	2	0	0	0	0	0	0	2	4	1	2	0	0	0	0	0	0	1	1	0	0	11.7	11.7	3.4	40.57	351	351	4
P05202	P05202	10	10	10	Aspartate aminotransferase, mitochondrial	Got2	sp|P05202|AATM_MOUSE Aspartate aminotransferase, mitochondrial OS=Mus musculus OX=10090 GN=Got2 PE=1 SV=1	1	10	10	10	5	4	0	0	0	1	2	9	6	7	5	4	0	0	0	1	2	9	6	7	5	4	0	0	0	1	2	9	6	7	26.3	26.3	26.3	47.411	430	430	3.97
P05213;A0A2R8VHF3	P05213;A0A2R8VHF3	15;8	1;0	0;0	Tubulin alpha-1B chain	Tuba1b	sp|P05213|TBA1B_MOUSE Tubulin alpha-1B chain OS=Mus musculus OX=10090 GN=Tuba1b PE=1 SV=2;tr|A0A2R8VHF3|A0A2R8VHF3_MOUSE Tubulin alpha chain (Fragment) OS=Mus musculus OX=10090 GN=Gm49450 PE=3 SV=1	2	15	1	0	11	12	11	10	4	4	13	12	11	12	0	0	1	1	0	0	0	0	0	0	0	0	0	0	0	0	0	0	0	0	44.1	2.9	0	50.151	451	451;267	3
P05532	P05532	3	3	3	Mast/stem cell growth factor receptor Kit	Kit	sp|P05532|KIT_MOUSE Mast/stem cell growth factor receptor Kit OS=Mus musculus OX=10090 GN=Kit PE=1 SV=3	1	3	3	3	0	0	3	0	0	0	0	0	0	0	0	0	3	0	0	0	0	0	0	0	0	0	3	0	0	0	0	0	0	0	3.2	3.2	3.2	109.34	979	979	1	3
P06330;P01757;P01756;A0A075B5U5;A0A0A6YWX0	P06330;P01757;P01756	5;3;3;2;2	5;3;3;2;2	0;0;0;0;0	Ig heavy chain V region AC38 205.12;Ig heavy chain V region J558;Ig heavy chain V region MOPC 104E		sp|P06330|HVM51_MOUSE Ig heavy chain V region AC38 205.12 OS=Mus musculus OX=10090 PE=1 SV=1;sp|P01757|HVM13_MOUSE Ig heavy chain V region J558 OS=Mus musculus OX=10090 PE=1 SV=1;sp|P01756|HVM12_MOUSE Ig heavy chain V region MOPC 104E OS=Mus musculus OX=10	5	5	5	0	2	3	2	3	3	1	3	3	2	2	2	3	2	3	3	1	3	3	2	2	0	0	0	0	0	0	0	0	0	0	63.6	63.6	0	12.934	118	118;117;117;116;117	2.92
P06684	P06684	3	3	3	Complement C5;Complement C5 beta chain;Complement C5 alpha chain;C5a anaphylatoxin;Complement C5 alpha chain	C5	sp|P06684|CO5_MOUSE Complement C5 OS=Mus musculus OX=10090 GN=C5 PE=1 SV=2	1	3	3	3	0	0	0	0	2	3	0	0	0	0	0	0	0	0	2	3	0	0	0	0	0	0	0	0	2	3	0	0	0	0	1.8	1.8	1.8	188.88	1680	1680	1.83	1
P07724	P07724	6	4	4	Serum albumin	Alb	sp|P07724|ALBU_MOUSE Albumin OS=Mus musculus OX=10090 GN=Alb PE=1 SV=3	1	6	4	4	0	0	1	1	2	1	5	5	0	1	0	0	0	0	1	0	4	4	0	1	0	0	0	0	1	0	4	4	0	1	11.8	8.1	8.1	68.692	608	608	1.91	1
P07759;A0A0R4J0I1	P07759	3;1	3;1	3;1	Serine protease inhibitor A3K	Serpina3k	sp|P07759|SPA3K_MOUSE Serine protease inhibitor A3K OS=Mus musculus OX=10090 GN=Serpina3k PE=1 SV=2	2	3	3	3	0	0	0	0	0	0	2	3	0	0	0	0	0	0	0	0	2	3	0	0	0	0	0	0	0	0	2	3	0	0	7.9	7.9	7.9	46.879	418	418;418	2
P07901;B7ZC50;A2A6A2;B7ZC49	P07901;B7ZC50	5;3;2;2	3;2;2;2	3;2;2;2	Heat shock protein HSP 90-alpha	Hsp90aa1	sp|P07901|HS90A_MOUSE Heat shock protein HSP 90-alpha OS=Mus musculus OX=10090 GN=Hsp90aa1 PE=1 SV=4;tr|B7ZC50|B7ZC50_MOUSE Heat shock protein HSP 90-alpha (Fragment) OS=Mus musculus OX=10090 GN=Hsp90aa1 PE=1 SV=1	4	5	3	3	0	2	0	0	0	0	3	5	0	4	0	0	0	0	0	0	1	3	0	2	0	0	0	0	0	0	1	3	0	2	7.9	4.4	4.4	84.787	733	733;201;98;103	2.17
P08113;D3Z1R1;E9PX27;F7C312	P08113;D3Z1R1;E9PX27;F7C312	2;1;1;1	1;0;0;1	1;0;0;1	Endoplasmin	Hsp90b1;Hsp90ab1	sp|P08113|ENPL_MOUSE Endoplasmin OS=Mus musculus OX=10090 GN=Hsp90b1 PE=1 SV=2;tr|D3Z1R1|D3Z1R1_MOUSE Heat shock protein HSP 90-beta (Fragment) OS=Mus musculus OX=10090 GN=Hsp90ab1 PE=1 SV=1;tr|E9PX27|E9PX27_MOUSE Heat shock protein HSP 90-beta OS=Mus musc	4	2	1	1	0	0	0	0	1	0	2	2	0	2	0	0	0	0	0	0	1	1	0	1	0	0	0	0	0	0	1	1	0	1	2.9	1.4	1.4	92.475	802	802;76;112;373	2
P08249;A0A0G2JF23;A0A0G2JGY4	P08249	10;4;3	10;4;3	10;4;3	Malate dehydrogenase, mitochondrial	Mdh2	sp|P08249|MDHM_MOUSE Malate dehydrogenase, mitochondrial OS=Mus musculus OX=10090 GN=Mdh2 PE=1 SV=3	3	10	10	10	5	4	1	0	1	1	5	9	7	7	5	4	1	0	1	1	5	9	7	7	5	4	1	0	1	1	5	9	7	7	41.4	41.4	41.4	35.611	338	338;199;153	3.98
P08752;A0A0A6YWA9	P08752;A0A0A6YWA9	6;4	4;3	4;3	Guanine nucleotide-binding protein G(i) subunit alpha-2	Gnai2	sp|P08752|GNAI2_MOUSE Guanine nucleotide-binding protein G(i) subunit alpha-2 OS=Mus musculus OX=10090 GN=Gnai2 PE=1 SV=5;tr|A0A0A6YWA9|A0A0A6YWA9_MOUSE Guanine nucleotide-binding protein G(i) subunit alpha-2 (Fragment) OS=Mus musculus OX=10090 GN=Gnai2 PE	2	6	4	4	1	0	2	1	1	1	5	5	3	3	0	0	0	0	0	0	3	3	1	1	0	0	0	0	0	0	3	3	1	1	22	15.5	15.5	40.489	355	355;160	4
P0DP28;P0DP27;P0DP26;Q9D6P8;A0A3Q4EHJ0	P0DP28;P0DP27;P0DP26	4;4;4;1;1	4;4;4;1;1	4;4;4;1;1			sp|P0DP28|CALM3_MOUSE Calmodulin-3 OS=Mus musculus OX=10090 GN=Calm3 PE=1 SV=1;sp|P0DP27|CALM2_MOUSE Calmodulin-2 OS=Mus musculus OX=10090 GN=Calm2 PE=1 SV=1;sp|P0DP26|CALM1_MOUSE Calmodulin-1 OS=Mus musculus OX=10090 GN=Calm1 PE=1 SV=1	5	4	4	4	0	1	0	0	0	0	1	4	1	0	0	1	0	0	0	0	1	4	1	0	0	1	0	0	0	0	1	4	1	0	30.9	30.9	30.9	16.837	149	149;149;149;149;113	5
P10126;D3Z3I8;D3YZ68	P10126;D3Z3I8;D3YZ68	5;3;3	5;3;3	2;2;2	Elongation factor 1-alpha 1	Eef1a1	sp|P10126|EF1A1_MOUSE Elongation factor 1-alpha 1 OS=Mus musculus OX=10090 GN=Eef1a1 PE=1 SV=3;tr|D3Z3I8|D3Z3I8_MOUSE Elongation factor 1-alpha 1 (Fragment) OS=Mus musculus OX=10090 GN=Eef1a1 PE=1 SV=1;tr|D3YZ68|D3YZ68_MOUSE Elongation factor 1-alpha 1 (Fr	3	5	5	2	2	3	1	1	0	0	3	3	4	4	2	3	1	1	0	0	3	3	4	4	1	1	0	0	0	0	0	1	1	1	10.8	10.8	4.1	50.113	462	462;186;249	3.3	1
P10852;A0A0U1RP98;A0A0U1RPK4;A0A0U1RPL8	P10852;A0A0U1RP98;A0A0U1RPK4	6;3;3;2	6;3;3;2	6;3;3;2	4F2 cell-surface antigen heavy chain	Slc3a2	sp|P10852|4F2_MOUSE 4F2 cell-surface antigen heavy chain OS=Mus musculus OX=10090 GN=Slc3a2 PE=1 SV=1;tr|A0A0U1RP98|A0A0U1RP98_MOUSE 4F2 cell-surface antigen heavy chain (Fragment) OS=Mus musculus OX=10090 GN=Slc3a2 PE=1 SV=1;tr|A0A0U1RPK4|A0A0U1RPK4_MOUSE	4	6	6	6	0	0	0	1	0	0	2	6	1	2	0	0	0	1	0	0	2	6	1	2	0	0	0	1	0	0	2	6	1	2	15.2	15.2	15.2	58.336	526	526;231;303;80	2
P11031	P11031	1	1	1	Activated RNA polymerase II transcriptional coactivator p15	Sub1	sp|P11031|TCP4_MOUSE Activated RNA polymerase II transcriptional coactivator p15 OS=Mus musculus OX=10090 GN=Sub1 PE=1 SV=3	1	1	1	1	0	0	0	0	0	0	0	0	0	1	0	0	0	0	0	0	0	0	0	1	0	0	0	0	0	0	0	0	0	1	8.7	8.7	8.7	14.427	127	127	5
P11499;E9Q3D6;E9Q0C3	P11499	9;3;2	9;3;2	6;2;2	Heat shock protein HSP 90-beta	Hsp90ab1	sp|P11499|HS90B_MOUSE Heat shock protein HSP 90-beta OS=Mus musculus OX=10090 GN=Hsp90ab1 PE=1 SV=3	3	9	9	6	0	2	0	0	1	0	4	9	0	4	0	2	0	0	1	0	4	9	0	4	0	0	0	0	0	0	1	6	0	1	15.1	15.1	9.8	83.28	724	724;189;161	2	1
P12382;A0A1W2P7T1	P12382	5;1	3;1	3;1	ATP-dependent 6-phosphofructokinase, liver type	Pfkl	sp|P12382|PFKAL_MOUSE ATP-dependent 6-phosphofructokinase, liver type OS=Mus musculus OX=10090 GN=Pfkl PE=1 SV=4	2	5	3	3	1	1	1	1	0	0	2	5	1	3	1	0	1	1	0	0	1	3	0	1	1	0	1	1	0	0	1	3	0	1	7.6	5.3	5.3	85.359	780	780;167	2
P12787	P12787	1	1	1	Cytochrome c oxidase subunit 5A, mitochondrial	Cox5a	sp|P12787|COX5A_MOUSE Cytochrome c oxidase subunit 5A, mitochondrial OS=Mus musculus OX=10090 GN=Cox5a PE=1 SV=2	1	1	1	1	0	0	0	0	0	0	0	1	1	0	0	0	0	0	0	0	0	1	1	0	0	0	0	0	0	0	0	1	1	0	6.2	6.2	6.2	16.101	146	146	5
P12960	P12960	12	12	12	Contactin-1	Cntn1	sp|P12960|CNTN1_MOUSE Contactin-1 OS=Mus musculus OX=10090 GN=Cntn1 PE=1 SV=1	1	12	12	12	1	3	0	0	0	0	1	10	2	5	1	3	0	0	0	0	1	10	2	5	1	3	0	0	0	0	1	10	2	5	16.8	16.8	16.8	113.39	1020	1020	1.09	20
P14094;A0A0A6YX05	P14094	11;3	11;3	11;3	Sodium/potassium-transporting ATPase subunit beta-1	Atp1b1	sp|P14094|AT1B1_MOUSE Sodium/potassium-transporting ATPase subunit beta-1 OS=Mus musculus OX=10090 GN=Atp1b1 PE=1 SV=1	2	11	11	11	4	3	3	3	0	0	6	9	4	8	4	3	3	3	0	0	6	9	4	8	4	3	3	3	0	0	6	9	4	8	36.2	36.2	36.2	35.194	304	304;132	3.05	4
P14106	P14106	6	6	6	Complement C1q subcomponent subunit B	C1qb	sp|P14106|C1QB_MOUSE Complement C1q subcomponent subunit B OS=Mus musculus OX=10090 GN=C1qb PE=1 SV=2	1	6	6	6	3	3	2	3	4	5	5	4	4	3	3	3	2	3	4	5	5	4	4	3	3	3	2	3	4	5	5	4	4	3	27.3	27.3	27.3	26.717	253	253	4.61	2
P14131	P14131	2	2	2	40S ribosomal protein S16	Rps16	sp|P14131|RS16_MOUSE 40S ribosomal protein S16 OS=Mus musculus OX=10090 GN=Rps16 PE=1 SV=4	1	2	2	2	0	0	1	0	0	0	1	0	1	0	0	0	1	0	0	0	1	0	1	0	0	0	1	0	0	0	1	0	1	0	14.4	14.4	14.4	16.445	146	146	5
P14152;A0A5F8MPN8	P14152;A0A5F8MPN8	3;2	3;2	3;2	Malate dehydrogenase, cytoplasmic	Mdh1	sp|P14152|MDHC_MOUSE Malate dehydrogenase, cytoplasmic OS=Mus musculus OX=10090 GN=Mdh1 PE=1 SV=3;tr|A0A5F8MPN8|A0A5F8MPN8_MOUSE Malate dehydrogenase OS=Mus musculus OX=10090 GN=Mdh1 PE=1 SV=1	2	3	3	3	0	0	0	0	0	0	0	3	0	3	0	0	0	0	0	0	0	3	0	3	0	0	0	0	0	0	0	3	0	3	13.8	13.8	13.8	36.511	334	334;355	4
P14206;A0A1L1SRW0;A0A1L1SUK3	P14206;A0A1L1SRW0;A0A1L1SUK3	6;3;3	6;3;3	6;3;3	40S ribosomal protein SA	Rpsa	sp|P14206|RSSA_MOUSE 40S ribosomal protein SA OS=Mus musculus OX=10090 GN=Rpsa PE=1 SV=4;tr|A0A1L1SRW0|A0A1L1SRW0_MOUSE 40S ribosomal protein SA (Fragment) OS=Mus musculus OX=10090 GN=Rpsa PE=1 SV=1;tr|A0A1L1SUK3|A0A1L1SUK3_MOUSE 40S ribosomal protein SA O	3	6	6	6	0	0	6	0	0	0	0	0	0	0	0	0	6	0	0	0	0	0	0	0	0	0	6	0	0	0	0	0	0	0	26.8	26.8	26.8	32.838	295	295;93;133	4
P14869;D3YVM5;S4R1N1	P14869;D3YVM5;S4R1N1	2;1;1	2;1;1	2;1;1	60S acidic ribosomal protein P0	Rplp0	sp|P14869|RLA0_MOUSE 60S acidic ribosomal protein P0 OS=Mus musculus OX=10090 GN=Rplp0 PE=1 SV=3;tr|D3YVM5|D3YVM5_MOUSE 60S acidic ribosomal protein P0 (Fragment) OS=Mus musculus OX=10090 GN=Rplp0 PE=1 SV=1;tr|S4R1N1|S4R1N1_MOUSE 60S acidic ribosomal prote	3	2	2	2	0	0	1	0	0	0	0	0	1	1	0	0	1	0	0	0	0	0	1	1	0	0	1	0	0	0	0	0	1	1	6.9	6.9	6.9	34.216	317	317;145;221	4
P14873	P14873	7	6	6	Microtubule-associated protein 1B;MAP1B heavy chain;MAP1 light chain LC1	Map1b	sp|P14873|MAP1B_MOUSE Microtubule-associated protein 1B OS=Mus musculus OX=10090 GN=Map1b PE=1 SV=2	1	7	6	6	0	1	1	0	0	0	0	3	4	4	0	1	0	0	0	0	0	2	3	4	0	1	0	0	0	0	0	2	3	4	3.3	2.9	2.9	270.25	2464	2464	1.3	9
P15105;D3YVK1	P15105	11;4	11;4	11;4	Glutamine synthetase	Glul	sp|P15105|GLNA_MOUSE Glutamine synthetase OS=Mus musculus OX=10090 GN=Glul PE=1 SV=6	2	11	11	11	0	4	8	5	5	0	3	6	5	3	0	4	8	5	5	0	3	6	5	3	0	4	8	5	5	0	3	6	5	3	31.4	31.4	31.4	42.119	373	373;198	3.92
P16054	P16054	1	1	1	Protein kinase C epsilon type	Prkce	sp|P16054|KPCE_MOUSE Protein kinase C epsilon type OS=Mus musculus OX=10090 GN=Prkce PE=1 SV=1	1	1	1	1	0	0	0	0	0	0	1	0	0	1	0	0	0	0	0	0	1	0	0	1	0	0	0	0	0	0	1	0	0	1	1.4	1.4	1.4	83.56	737	737	2
P16330	P16330	15	15	15	2,3-cyclic-nucleotide 3-phosphodiesterase	Cnp	sp|P16330|CN37_MOUSE 2,3-cyclic-nucleotide 3-phosphodiesterase OS=Mus musculus OX=10090 GN=Cnp PE=1 SV=3	1	15	15	15	5	10	9	1	0	0	7	11	9	9	5	10	9	1	0	0	7	11	9	9	5	10	9	1	0	0	7	11	9	9	32.1	32.1	32.1	47.123	420	420	3.65
Q62167;P16381;Q62095;Q501J6;Q61496;Q3V086;Q3U741;S4R1I6;Q3TU25	Q62167;P16381;Q62095	10;10;9;1;1;1;1;1;1	10;10;9;1;1;1;1;1;1	9;9;8;0;1;1;0;0;0	ATP-dependent RNA helicase DDX3X;Putative ATP-dependent RNA helicase Pl10;ATP-dependent RNA helicase DDX3Y	Ddx3x;D1Pas1;Ddx3y	sp|Q62167|DDX3X_MOUSE ATP-dependent RNA helicase DDX3X OS=Mus musculus OX=10090 GN=Ddx3x PE=1 SV=3;sp|P16381|DDX3L_MOUSE Putative ATP-dependent RNA helicase Pl10 OS=Mus musculus OX=10090 GN=D1Pas1 PE=1 SV=1;sp|Q62095|DDX3Y_MOUSE ATP-dependent RNA helicase	9	10	10	9	6	1	0	0	0	0	3	3	6	5	6	1	0	0	0	0	3	3	6	5	5	1	0	0	0	0	3	3	6	5	17.2	17.2	15.6	73.101	662	662;660;658;650;702;728;652;406;418	2.12
P17182;P21550;A0A0N4SUI6;B1ARR6;Q5SX61;Q5SX60;B1ARR7;D3YVD3;D3Z2S4;Q5SX59;B0QZL1;Q6PHC1	P17182;P21550;A0A0N4SUI6;B1ARR6;Q5SX61;Q5SX60;B1ARR7;D3YVD3;D3Z2S4;Q5SX59;B0QZL1;Q6PHC1	2;1;1;1;1;1;1;1;1;1;1;1	1;0;0;0;0;0;0;0;0;0;0;1	1;0;0;0;0;0;0;0;0;0;0;1	Alpha-enolase;Beta-enolase;Enolase	Eno1;Eno3;Eno2	sp|P17182|ENOA_MOUSE Alpha-enolase OS=Mus musculus OX=10090 GN=Eno1 PE=1 SV=3;sp|P21550|ENOB_MOUSE Beta-enolase OS=Mus musculus OX=10090 GN=Eno3 PE=1 SV=3;tr|A0A0N4SUI6|A0A0N4SUI6_MOUSE Gamma-enolase (Fragment) OS=Mus musculus OX=10090 GN=Eno2 PE=1 SV=1;tr	12	2	1	1	2	1	0	0	0	0	1	2	1	1	1	1	0	0	0	0	1	1	1	1	1	1	0	0	0	0	1	1	1	1	6.9	2.8	2.8	47.14	434	434;434;58;67;70;80;119;121;162;196;221;366	3
P17426;A0A140LIG7;A0A140LHG0	P17426;A0A140LIG7	10;5;1	7;5;0	7;5;0	AP-2 complex subunit alpha-1	Ap2a1	sp|P17426|AP2A1_MOUSE AP-2 complex subunit alpha-1 OS=Mus musculus OX=10090 GN=Ap2a1 PE=1 SV=1;tr|A0A140LIG7|A0A140LIG7_MOUSE AP-2 complex subunit alpha-1 (Fragment) OS=Mus musculus OX=10090 GN=Ap2a1 PE=1 SV=1	3	10	7	7	1	0	4	2	0	0	2	5	2	3	1	0	1	1	0	0	2	5	2	3	1	0	1	1	0	0	2	5	2	3	14.4	10.6	10.6	107.66	977	977;317;38	1.93	1
P17427	P17427	12	12	9	AP-2 complex subunit alpha-2	Ap2a2	sp|P17427|AP2A2_MOUSE AP-2 complex subunit alpha-2 OS=Mus musculus OX=10090 GN=Ap2a2 PE=1 SV=2	1	12	12	9	0	1	3	3	0	0	2	7	2	5	0	1	3	3	0	0	2	7	2	5	0	1	0	2	0	0	2	7	2	5	16.3	16.3	12.4	104.02	938	938	1.88	3
P17742;A0A1L1SST0;V9GXC1;V9GX31	P17742;A0A1L1SST0	3;2;1;1	3;2;1;1	3;2;1;1	Peptidyl-prolyl cis-trans isomerase A;Peptidyl-prolyl cis-trans isomerase A, N-terminally processed	Ppia	sp|P17742|PPIA_MOUSE Peptidyl-prolyl cis-trans isomerase A OS=Mus musculus OX=10090 GN=Ppia PE=1 SV=2;tr|A0A1L1SST0|A0A1L1SST0_MOUSE Peptidyl-prolyl cis-trans isomerase OS=Mus musculus OX=10090 GN=Ppia PE=1 SV=1	4	3	3	3	0	0	0	0	0	0	0	3	0	0	0	0	0	0	0	0	0	3	0	0	0	0	0	0	0	0	0	3	0	0	14.6	14.6	14.6	17.971	164	164;156;77;77	5
P18528	P18528	1	1	1	Ig heavy chain V region 6.96		sp|P18528|HVM57_MOUSE Ig heavy chain V region 6.96 OS=Mus musculus OX=10090 PE=4 SV=1	1	1	1	1	1	1	0	0	0	0	0	1	1	1	1	1	0	0	0	0	0	1	1	1	1	1	0	0	0	0	0	1	1	1	19.4	19.4	19.4	11.007	98	98	3.17
P18872;D3Z2M7;F7BLT7;Q8CGK7;P20612;P50149;Q3V3I2;A2A610;A2AE31;Q8C040;Q8BHK8;A2AE32;Q66L47	P18872;D3Z2M7	12;10;5;1;1;1;1;1;1;1;1;1;1	12;10;5;1;1;1;1;1;1;1;1;1;1	10;9;5;0;0;0;0;0;0;0;0;0;0	Guanine nucleotide-binding protein G(o) subunit alpha	Gnao1	sp|P18872|GNAO_MOUSE Guanine nucleotide-binding protein G(o) subunit alpha OS=Mus musculus OX=10090 GN=Gnao1 PE=1 SV=3;tr|D3Z2M7|D3Z2M7_MOUSE Guanine nucleotide-binding protein G(o) subunit alpha (Fragment) OS=Mus musculus OX=10090 GN=Gnao1 PE=1 SV=1	13	12	12	10	6	6	9	6	4	3	11	11	11	11	6	6	9	6	4	3	11	11	11	11	5	6	7	5	3	2	9	9	9	9	38.4	38.4	31.9	40.084	354	354;179;101;381;350;354;354;91;112;134;230;232;448	3.73	6
P19157;A0A494BAW2;A0A494B908;P46425;A0A494BAS3;A0A494BAU3;A0A494BAM8;Q8VC73;F6RWR5	P19157;A0A494BAW2;A0A494B908;P46425	19;17;15;12;8;8;4;1;1	19;17;15;12;8;8;4;1;1	19;17;15;12;8;8;4;1;1	Glutathione S-transferase P 1;Glutathione S-transferase P 2	Gstp1;Gstp2	sp|P19157|GSTP1_MOUSE Glutathione S-transferase P 1 OS=Mus musculus OX=10090 GN=Gstp1 PE=1 SV=2;tr|A0A494BAW2|A0A494BAW2_MOUSE GST class-pi OS=Mus musculus OX=10090 GN=Gstp1 PE=1 SV=1;tr|A0A494B908|A0A494B908_MOUSE GST class-pi (Fragment) OS=Mus musculus O	9	19	19	19	15	16	9	14	11	10	13	15	14	17	15	16	9	14	11	10	13	15	14	17	15	16	9	14	11	10	13	15	14	17	69	69	69	23.609	210	210;193;160;210;84;95;132;210;210	4.34	41
P19783;D6RG40;M0QWX7	P19783;D6RG40;M0QWX7	2;1;1	2;1;1	2;1;1	Cytochrome c oxidase subunit 4 isoform 1, mitochondrial	Cox4i1;Chka	sp|P19783|COX41_MOUSE Cytochrome c oxidase subunit 4 isoform 1, mitochondrial OS=Mus musculus OX=10090 GN=Cox4i1 PE=1 SV=2;tr|D6RG40|D6RG40_MOUSE Choline kinase alpha OS=Mus musculus OX=10090 GN=Chka PE=4 SV=1;tr|M0QWX7|M0QWX7_MOUSE Cytochrome c oxidase su	3	2	2	2	0	1	0	0	0	0	2	2	1	0	0	1	0	0	0	0	2	2	1	0	0	1	0	0	0	0	2	2	1	0	15.4	15.4	15.4	19.53	169	169;76;92	5
P20029	P20029	14	13	13	78 kDa glucose-regulated protein	Hspa5	sp|P20029|BIP_MOUSE Endoplasmic reticulum chaperone BiP OS=Mus musculus OX=10090 GN=Hspa5 PE=1 SV=3	1	14	13	13	3	4	2	0	0	0	6	12	4	4	3	3	1	0	0	0	5	11	3	3	3	3	1	0	0	0	5	11	3	3	26.4	26.4	26.4	72.421	655	655	2
P20108	P20108	3	3	3	Thioredoxin-dependent peroxide reductase, mitochondrial	Prdx3	sp|P20108|PRDX3_MOUSE Thioredoxin-dependent peroxide reductase, mitochondrial OS=Mus musculus OX=10090 GN=Prdx3 PE=1 SV=1	1	3	3	3	0	0	3	0	0	0	0	0	0	0	0	0	3	0	0	0	0	0	0	0	0	0	3	0	0	0	0	0	0	0	16.7	16.7	16.7	28.127	257	257	5
P20491	P20491	1	1	1	High affinity immunoglobulin epsilon receptor subunit gamma	Fcer1g	sp|P20491|FCERG_MOUSE High affinity immunoglobulin epsilon receptor subunit gamma OS=Mus musculus OX=10090 GN=Fcer1g PE=1 SV=1	1	1	1	1	1	0	0	0	0	0	0	0	0	0	1	0	0	0	0	0	0	0	0	0	1	0	0	0	0	0	0	0	0	0	15.1	15.1	15.1	9.6523	86	86	5
P21278	P21278	3	2	2	Guanine nucleotide-binding protein subunit alpha-11	Gna11	sp|P21278|GNA11_MOUSE Guanine nucleotide-binding protein subunit alpha-11 OS=Mus musculus OX=10090 GN=Gna11 PE=1 SV=1	1	3	2	2	0	1	1	0	0	0	2	3	1	2	0	1	0	0	0	0	1	2	0	1	0	1	0	0	0	0	1	2	0	1	8.9	5.8	5.8	42.024	359	359	4
P21279	P21279	6	6	5	Guanine nucleotide-binding protein G(q) subunit alpha	Gnaq	sp|P21279|GNAQ_MOUSE Guanine nucleotide-binding protein G(q) subunit alpha OS=Mus musculus OX=10090 GN=Gnaq PE=1 SV=4	1	6	6	5	0	0	1	0	0	0	3	5	3	4	0	0	1	0	0	0	3	5	3	4	0	0	0	0	0	0	2	4	2	3	25.3	25.3	22.3	42.158	359	359	4
P22723;Q8C7N0	P22723;Q8C7N0	1;1	1;1	1;1	Gamma-aminobutyric acid receptor subunit gamma-2	Gabrg2	sp|P22723|GBRG2_MOUSE Gamma-aminobutyric acid receptor subunit gamma-2 OS=Mus musculus OX=10090 GN=Gabrg2 PE=1 SV=3;tr|Q8C7N0|Q8C7N0_MOUSE GABA(A) receptor subunit gamma-2 OS=Mus musculus OX=10090 GN=Gabrg2 PE=1 SV=1	2	1	1	1	0	0	0	0	0	0	0	1	1	0	0	0	0	0	0	0	0	1	1	0	0	0	0	0	0	0	0	1	1	0	2.1	2.1	2.1	55.098	474	474;384	3.5
P23242	P23242	2	2	2	Gap junction alpha-1 protein	Gja1	sp|P23242|CXA1_MOUSE Gap junction alpha-1 protein OS=Mus musculus OX=10090 GN=Gja1 PE=1 SV=2	1	2	2	2	0	0	0	0	0	0	1	1	2	1	0	0	0	0	0	0	1	1	2	1	0	0	0	0	0	0	1	1	2	1	6	6	6	43.004	382	382	4
P23818;F6YNQ1	P23818;F6YNQ1	35;34	1;1	1;1	Glutamate receptor 1	Gria1	sp|P23818|GRIA1_MOUSE Glutamate receptor 1 OS=Mus musculus OX=10090 GN=Gria1 PE=1 SV=1;tr|F6YNQ1|F6YNQ1_MOUSE Glutamate receptor OS=Mus musculus OX=10090 GN=Gria1 PE=1 SV=1	2	35	1	1	0	2	28	17	4	1	35	34	29	27	0	0	1	1	0	0	1	1	1	1	0	0	1	1	0	0	1	1	1	1	42.2	1	1	101.57	907	907;838	1.86	6
P23819	P23819	47	47	1	Glutamate receptor 2	Gria2	sp|P23819|GRIA2_MOUSE Glutamate receptor 2 OS=Mus musculus OX=10090 GN=Gria2 PE=1 SV=3	1	47	47	1	0	5	39	29	3	0	46	45	40	45	0	5	39	29	3	0	46	45	40	45	0	0	1	1	0	0	1	1	1	1	49.8	49.8	1.6	98.661	883	883	2.15	197
P24369	P24369	1	1	1	Peptidyl-prolyl cis-trans isomerase B	Ppib	sp|P24369|PPIB_MOUSE Peptidyl-prolyl cis-trans isomerase B OS=Mus musculus OX=10090 GN=Ppib PE=1 SV=2	1	1	1	1	0	0	0	0	0	0	0	0	0	1	0	0	0	0	0	0	0	0	0	1	0	0	0	0	0	0	0	0	0	1	6	6	6	23.713	216	216	5
P26151	P26151	9	9	9	High affinity immunoglobulin gamma Fc receptor I	Fcgr1	sp|P26151|FCGR1_MOUSE High affinity immunoglobulin gamma Fc receptor I OS=Mus musculus OX=10090 GN=Fcgr1 PE=1 SV=1	1	9	9	9	4	9	1	1	2	0	2	3	4	4	4	9	1	1	2	0	2	3	4	4	4	9	1	1	2	0	2	3	4	4	21.3	21.3	21.3	44.887	404	404	2.22	1
P26443	P26443	4	4	4	Glutamate dehydrogenase 1, mitochondrial	Glud1	sp|P26443|DHE3_MOUSE Glutamate dehydrogenase 1, mitochondrial OS=Mus musculus OX=10090 GN=Glud1 PE=1 SV=1	1	4	4	4	2	0	0	0	0	0	0	3	0	3	2	0	0	0	0	0	0	3	0	3	2	0	0	0	0	0	0	3	0	3	7.9	7.9	7.9	61.336	558	558	3
P27048;P63163	P27048;P63163	1;1	1;1	1;1	Small nuclear ribonucleoprotein-associated protein B;Small nuclear ribonucleoprotein-associated protein N	Snrpb;Snrpn	sp|P27048|RSMB_MOUSE Small nuclear ribonucleoprotein-associated protein B OS=Mus musculus OX=10090 GN=Snrpb PE=1 SV=1;sp|P63163|RSMN_MOUSE Small nuclear ribonucleoprotein-associated protein N OS=Mus musculus OX=10090 GN=Snrpn PE=1 SV=1	2	1	1	1	0	0	0	0	0	0	0	1	0	0	0	0	0	0	0	0	0	1	0	0	0	0	0	0	0	0	0	1	0	0	3.5	3.5	3.5	23.656	231	231;240	5
P27601;Q9D034	P27601	3;1	3;1	3;1	Guanine nucleotide-binding protein subunit alpha-13	Gna13	sp|P27601|GNA13_MOUSE Guanine nucleotide-binding protein subunit alpha-13 OS=Mus musculus OX=10090 GN=Gna13 PE=1 SV=1	2	3	3	3	0	0	0	0	0	0	2	2	0	0	0	0	0	0	0	0	2	2	0	0	0	0	0	0	0	0	2	2	0	0	9.8	9.8	9.8	44.054	377	377;173	4
P27773	P27773	1	1	1	Protein disulfide-isomerase A3	Pdia3	sp|P27773|PDIA3_MOUSE Protein disulfide-isomerase A3 OS=Mus musculus OX=10090 GN=Pdia3 PE=1 SV=2	1	1	1	1	0	0	0	0	0	0	1	0	0	0	0	0	0	0	0	0	1	0	0	0	0	0	0	0	0	0	1	0	0	0	2.2	2.2	2.2	56.678	505	505	3
P28652;Q5SVJ0;Q5SVI9;Q5SVJ1;Q5SVI3;Q5SVI0;Q5SVI2;Q68EG2;Q5SVI1	P28652;Q5SVJ0;Q5SVI9;Q5SVJ1;Q5SVI3;Q5SVI0;Q5SVI2;Q68EG2;Q5SVI1	4;4;4;4;4;4;4;4;4	1;1;1;1;1;1;1;1;1	1;1;1;1;1;1;1;1;1	Calcium/calmodulin-dependent protein kinase type II subunit beta	Camk2b	sp|P28652|KCC2B_MOUSE Calcium/calmodulin-dependent protein kinase type II subunit beta OS=Mus musculus OX=10090 GN=Camk2b PE=1 SV=2;tr|Q5SVJ0|Q5SVJ0_MOUSE Calcium/calmodulin-dependent protein kinase OS=Mus musculus OX=10090 GN=Camk2b PE=1 SV=1;tr|Q5SVI9|Q5	9	4	1	1	3	2	0	0	0	0	1	3	3	4	1	1	0	0	0	0	1	1	1	1	1	1	0	0	0	0	1	1	1	1	9.4	1.7	1.7	60.46	542	542;666;479;503;518;518;529;545;589	3
P28663	P28663	3	3	1	Beta-soluble NSF attachment protein	Napb	sp|P28663|SNAB_MOUSE Beta-soluble NSF attachment protein OS=Mus musculus OX=10090 GN=Napb PE=1 SV=2	1	3	3	1	0	1	0	0	0	0	0	3	0	2	0	1	0	0	0	0	0	3	0	2	0	1	0	0	0	0	0	1	0	1	15.8	15.8	4.4	33.557	298	298	4
P28665;P28666;A0A0N4SVU1	P28665	10;3;2	10;3;2	10;3;2	Murinoglobulin-1	Mug1	sp|P28665|MUG1_MOUSE Murinoglobulin-1 OS=Mus musculus OX=10090 GN=Mug1 PE=1 SV=3	3	10	10	10	0	0	0	0	0	0	7	7	0	0	0	0	0	0	0	0	7	7	0	0	0	0	0	0	0	0	7	7	0	0	7.5	7.5	7.5	165.3	1476	1476;1451;1476	1.47	10
P30275;A2ARP5	P30275;A2ARP5	4;2	4;2	4;2	Creatine kinase U-type, mitochondrial	Ckmt1	sp|P30275|KCRU_MOUSE Creatine kinase U-type, mitochondrial OS=Mus musculus OX=10090 GN=Ckmt1 PE=1 SV=1;tr|A2ARP5|A2ARP5_MOUSE Creatine kinase (Fragment) OS=Mus musculus OX=10090 GN=Ckmt1 PE=1 SV=1	2	4	4	4	0	0	0	0	0	0	1	3	2	1	0	0	0	0	0	0	1	3	2	1	0	0	0	0	0	0	1	3	2	1	18.7	18.7	18.7	47.003	418	418;251	3.88
P31650	P31650	1	1	1	Sodium- and chloride-dependent GABA transporter 3	Slc6a11	sp|P31650|S6A11_MOUSE Sodium- and chloride-dependent GABA transporter 3 OS=Mus musculus OX=10090 GN=Slc6a11 PE=1 SV=2	1	1	1	1	0	0	0	0	0	0	0	1	0	0	0	0	0	0	0	0	0	1	0	0	0	0	0	0	0	0	0	1	0	0	1.4	1.4	1.4	69.96	627	627	2
P31938	P31938	1	1	1	Dual specificity mitogen-activated protein kinase kinase 1	Map2k1	sp|P31938|MP2K1_MOUSE Dual specificity mitogen-activated protein kinase kinase 1 OS=Mus musculus OX=10090 GN=Map2k1 PE=1 SV=2	1	1	1	1	0	0	0	0	0	0	1	1	0	0	0	0	0	0	0	0	1	1	0	0	0	0	0	0	0	0	1	1	0	0	3.1	3.1	3.1	43.474	393	393	4
P35486	P35486	8	8	8	Pyruvate dehydrogenase E1 component subunit alpha, somatic form, mitochondrial	Pdha1	sp|P35486|ODPA_MOUSE Pyruvate dehydrogenase E1 component subunit alpha, somatic form, mitochondrial OS=Mus musculus OX=10090 GN=Pdha1 PE=1 SV=1	1	8	8	8	2	5	2	4	2	0	3	6	5	8	2	5	2	4	2	0	3	6	5	8	2	5	2	4	2	0	3	6	5	8	22.1	22.1	22.1	43.231	390	390	3.91
P35564	P35564	4	4	4	Calnexin	Canx	sp|P35564|CALX_MOUSE Calnexin OS=Mus musculus OX=10090 GN=Canx PE=1 SV=1	1	4	4	4	0	0	0	2	0	0	2	2	1	1	0	0	0	2	0	0	2	2	1	1	0	0	0	2	0	0	2	2	1	1	9	9	9	67.277	591	591	2
P35802	P35802	2	2	2	Neuronal membrane glycoprotein M6-a	Gpm6a	sp|P35802|GPM6A_MOUSE Neuronal membrane glycoprotein M6-a OS=Mus musculus OX=10090 GN=Gpm6a PE=1 SV=1	1	2	2	2	1	1	0	1	1	1	2	2	1	1	1	1	0	1	1	1	2	2	1	1	1	1	0	1	1	1	2	2	1	1	9	9	9	31.149	278	278	4.41	1
P38647	P38647	13	13	13	Stress-70 protein, mitochondrial	Hspa9	sp|P38647|GRP75_MOUSE Stress-70 protein, mitochondrial OS=Mus musculus OX=10090 GN=Hspa9 PE=1 SV=3	1	13	13	13	7	5	4	6	6	2	11	11	10	10	7	5	4	6	6	2	11	11	10	10	7	5	4	6	6	2	11	11	10	10	25.6	25.6	25.6	73.46	679	679	2
P39053	P39053	46	3	3	Dynamin-1	Dnm1	sp|P39053|DYN1_MOUSE Dynamin-1 OS=Mus musculus OX=10090 GN=Dnm1 PE=1 SV=2	1	46	3	3	6	4	3	44	3	1	11	18	11	12	0	0	0	3	0	0	0	0	0	0	0	0	0	3	0	0	0	0	0	0	56.5	3.5	3.5	97.802	867	867	2	2
P42669	P42669	3	3	3	Transcriptional activator protein Pur-alpha	Pura	sp|P42669|PURA_MOUSE Transcriptional activator protein Pur-alpha OS=Mus musculus OX=10090 GN=Pura PE=1 SV=1	1	3	3	3	0	0	3	3	0	0	0	3	3	3	0	0	3	3	0	0	0	3	3	3	0	0	3	3	0	0	0	3	3	3	18.1	18.1	18.1	34.883	321	321	4
P43006;A2APL5;F7CAM6;F6ZRK3;A2AQI7	P43006;A2APL5	11;10;5;4;2	11;10;5;4;2	11;10;5;4;2	Excitatory amino acid transporter 2;Amino acid transporter	Slc1a2	sp|P43006|EAA2_MOUSE Excitatory amino acid transporter 2 OS=Mus musculus OX=10090 GN=Slc1a2 PE=1 SV=1;tr|A2APL5|A2APL5_MOUSE Amino acid transporter OS=Mus musculus OX=10090 GN=Slc1a2 PE=1 SV=1	5	11	11	11	1	5	8	3	4	3	8	8	5	4	1	5	8	3	4	3	8	8	5	4	1	5	8	3	4	3	8	8	5	4	21.9	21.9	21.9	62.03	572	572;561;196;145;157	1.77	49
P46096;P46097;Q9R0N5;A0A0R4J2C2	P46096	9;1;1;1	9;1;1;1	9;1;1;1	Synaptotagmin-1	Syt1	sp|P46096|SYT1_MOUSE Synaptotagmin-1 OS=Mus musculus OX=10090 GN=Syt1 PE=1 SV=1	4	9	9	9	7	6	0	0	0	0	5	8	5	9	7	6	0	0	0	0	5	8	5	9	7	6	0	0	0	0	5	8	5	9	24.9	24.9	24.9	47.417	421	421;422;386;422	3.12	1
P46460;G3UX86	P46460	19;4	19;4	19;4	Vesicle-fusing ATPase	Nsf	sp|P46460|NSF_MOUSE Vesicle-fusing ATPase OS=Mus musculus OX=10090 GN=Nsf PE=1 SV=2	2	19	19	19	5	8	5	1	0	1	14	11	10	12	5	8	5	1	0	1	14	11	10	12	5	8	5	1	0	1	14	11	10	12	31.9	31.9	31.9	82.613	744	744;210	2.12
P47708	P47708	2	2	2	Rabphilin-3A	Rph3a	sp|P47708|RP3A_MOUSE Rabphilin-3A OS=Mus musculus OX=10090 GN=Rph3a PE=1 SV=2	1	2	2	2	0	0	0	0	0	0	0	2	1	1	0	0	0	0	0	0	0	2	1	1	0	0	0	0	0	0	0	2	1	1	5.6	5.6	5.6	75.488	681	681	2
P47754;A0A0N4SVM0;D6RCW7;P47753;A0A0G2JE27;Q5RKN9	P47754;A0A0N4SVM0;D6RCW7	5;4;4;1;1;1	5;4;4;1;1;1	5;4;4;1;1;1	F-actin-capping protein subunit alpha-2	Capza2	sp|P47754|CAZA2_MOUSE F-actin-capping protein subunit alpha-2 OS=Mus musculus OX=10090 GN=Capza2 PE=1 SV=3;tr|A0A0N4SVM0|A0A0N4SVM0_MOUSE F-actin-capping protein subunit alpha (Fragment) OS=Mus musculus OX=10090 GN=Capza2 PE=1 SV=1;tr|D6RCW7|D6RCW7_MOUSE F	6	5	5	5	2	2	4	1	1	0	2	3	3	4	2	2	4	1	1	0	2	3	3	4	2	2	4	1	1	0	2	3	3	4	26.6	26.6	26.6	32.967	286	286;169;174;286;112;286	4
P47857;A0A2R8VHV2;A0A2R8VHA5	P47857	9;2;1	9;2;1	7;2;1	ATP-dependent 6-phosphofructokinase, muscle type	Pfkm	sp|P47857|PFKAM_MOUSE ATP-dependent 6-phosphofructokinase, muscle type OS=Mus musculus OX=10090 GN=Pfkm PE=1 SV=3	3	9	9	7	0	1	3	2	0	0	7	6	5	8	0	1	3	2	0	0	7	6	5	8	0	0	3	2	0	0	6	4	4	6	13.1	13.1	10.8	85.268	780	780;197;117	1.94	2
P48320	P48320	1	1	1	Glutamate decarboxylase 2	Gad2	sp|P48320|DCE2_MOUSE Glutamate decarboxylase 2 OS=Mus musculus OX=10090 GN=Gad2 PE=1 SV=1	1	1	1	1	0	0	0	0	0	0	0	1	0	0	0	0	0	0	0	0	0	1	0	0	0	0	0	0	0	0	0	1	0	0	3.8	3.8	3.8	65.223	585	585	3
P48774;E9PVM7;E9Q024;E9PV63;E9Q5L9	P48774;E9PVM7	7;6;3;3;2	7;6;3;3;2	7;6;3;3;2	Glutathione S-transferase Mu 5	Gstm5	sp|P48774|GSTM5_MOUSE Glutathione S-transferase Mu 5 OS=Mus musculus OX=10090 GN=Gstm5 PE=1 SV=1;tr|E9PVM7|E9PVM7_MOUSE Glutathione S-transferase (Fragment) OS=Mus musculus OX=10090 GN=Gstm5 PE=1 SV=1	5	7	7	7	4	5	0	0	0	0	3	3	3	5	4	5	0	0	0	0	3	3	3	5	4	5	0	0	0	0	3	3	3	5	32.6	32.6	32.6	26.635	224	224;215;73;158;69	5
P48962;Q3V132	P48962	11;1	11;1	6;0	ADP/ATP translocase 1	Slc25a4	sp|P48962|ADT1_MOUSE ADP/ATP translocase 1 OS=Mus musculus OX=10090 GN=Slc25a4 PE=1 SV=4	2	11	11	6	5	5	5	2	1	2	9	10	4	8	5	5	5	2	1	2	9	10	4	8	4	3	2	0	0	0	5	5	1	4	34.2	34.2	18.1	32.904	298	298;320	4.15	9
P50516;D3Z1B9;D3YWH3;D3YZ23	P50516	13;4;2;1	13;4;2;1	13;4;2;1	V-type proton ATPase catalytic subunit A	Atp6v1a	sp|P50516|VATA_MOUSE V-type proton ATPase catalytic subunit A OS=Mus musculus OX=10090 GN=Atp6v1a PE=1 SV=2	4	13	13	13	1	3	2	1	2	0	4	12	5	5	1	3	2	1	2	0	4	12	5	5	1	3	2	1	2	0	4	12	5	5	26.1	26.1	26.1	68.325	617	617;237;196;77	2
P51863	P51863	4	4	4	V-type proton ATPase subunit d 1	Atp6v0d1	sp|P51863|VA0D1_MOUSE V-type proton ATPase subunit d 1 OS=Mus musculus OX=10090 GN=Atp6v0d1 PE=1 SV=2	1	4	4	4	0	0	1	0	0	0	1	4	0	1	0	0	1	0	0	0	1	4	0	1	0	0	1	0	0	0	1	4	0	1	11.1	11.1	11.1	40.301	351	351	4
P51881	P51881	11	6	6	ADP/ATP translocase 2;ADP/ATP translocase 2, N-terminally processed	Slc25a5	sp|P51881|ADT2_MOUSE ADP/ATP translocase 2 OS=Mus musculus OX=10090 GN=Slc25a5 PE=1 SV=3	1	11	6	6	1	4	4	2	1	4	8	11	8	6	0	2	1	0	0	2	4	6	5	2	0	2	1	0	0	2	4	6	5	2	33.6	17.4	17.4	32.931	298	298	4.77	1
P52480;A0A1L1SUV0;A0A1L1SSN6;A0A1L1STV8;A0A1L1SQV8;A0A1L1SU37	P52480;A0A1L1SUV0;A0A1L1SSN6;A0A1L1STV8;A0A1L1SQV8;A0A1L1SU37	2;1;1;1;1;1	2;1;1;1;1;1	2;1;1;1;1;1	Pyruvate kinase PKM	Pkm	sp|P52480|KPYM_MOUSE Pyruvate kinase PKM OS=Mus musculus OX=10090 GN=Pkm PE=1 SV=4;tr|A0A1L1SUV0|A0A1L1SUV0_MOUSE Pyruvate kinase (Fragment) OS=Mus musculus OX=10090 GN=Pkm PE=1 SV=1;tr|A0A1L1SSN6|A0A1L1SSN6_MOUSE Pyruvate kinase (Fragment) OS=Mus musculus	6	2	2	2	1	0	0	0	0	0	0	2	0	1	1	0	0	0	0	0	0	2	0	1	1	0	0	0	0	0	0	2	0	1	6	6	6	57.844	531	531;155;176;184;187;232	3
P53994;P59279;Q3TEG7;G3UXQ7;G3V022;A0A1D5RMH1;S4R232	P53994;P59279;Q3TEG7;G3UXQ7;G3V022;A0A1D5RMH1;S4R232	2;2;2;1;1;1;1	2;2;2;1;1;1;1	2;2;2;1;1;1;1	Ras-related protein Rab-2A;Ras-related protein Rab-2B	Rab2a;Rab2b;Rab4b	sp|P53994|RAB2A_MOUSE Ras-related protein Rab-2A OS=Mus musculus OX=10090 GN=Rab2a PE=1 SV=1;sp|P59279|RAB2B_MOUSE Ras-related protein Rab-2B OS=Mus musculus OX=10090 GN=Rab2b PE=1 SV=1;tr|Q3TEG7|Q3TEG7_MOUSE Ras-related protein Rab-2B OS=Mus musculus OX=1	7	2	2	2	0	0	0	0	0	0	2	2	0	0	0	0	0	0	0	0	2	2	0	0	0	0	0	0	0	0	2	2	0	0	11.3	11.3	11.3	23.547	212	212;216;193;62;71;96;103	5
P54823	P54823	6	6	6	Probable ATP-dependent RNA helicase DDX6	Ddx6	sp|P54823|DDX6_MOUSE Probable ATP-dependent RNA helicase DDX6 OS=Mus musculus OX=10090 GN=Ddx6 PE=1 SV=1	1	6	6	6	4	6	0	0	0	0	3	3	4	3	4	6	0	0	0	0	3	3	4	3	4	6	0	0	0	0	3	3	4	3	19.5	19.5	19.5	54.191	483	483	3
P56135;F8WHP8	P56135;F8WHP8	3;2	3;2	3;2	ATP synthase subunit f, mitochondrial	Atp5j2	sp|P56135|ATPK_MOUSE ATP synthase subunit f, mitochondrial OS=Mus musculus OX=10090 GN=Atp5mf PE=1 SV=3;tr|F8WHP8|F8WHP8_MOUSE ATP synthase membrane subunit f OS=Mus musculus OX=10090 GN=Atp5j2 PE=1 SV=1	2	3	3	3	0	0	0	0	0	0	1	2	1	0	0	0	0	0	0	0	1	2	1	0	0	0	0	0	0	0	1	2	1	0	36.4	36.4	36.4	10.344	88	88;76	5
P56480	P56480	22	22	22	ATP synthase subunit beta, mitochondrial	Atp5b	sp|P56480|ATPB_MOUSE ATP synthase subunit beta, mitochondrial OS=Mus musculus OX=10090 GN=Atp5f1b PE=1 SV=2	1	22	22	22	15	13	1	1	2	1	15	22	9	16	15	13	1	1	2	1	15	22	9	16	15	13	1	1	2	1	15	22	9	16	64.3	64.3	64.3	56.3	529	529	3.08	1
P56564;O35544;D3YY51;A0A1W2P762	P56564	7;1;1;1	7;1;1;1	7;1;1;1	Excitatory amino acid transporter 1	Slc1a3	sp|P56564|EAA1_MOUSE Excitatory amino acid transporter 1 OS=Mus musculus OX=10090 GN=Slc1a3 PE=1 SV=2	4	7	7	7	5	4	2	3	1	1	7	4	5	2	5	4	2	3	1	1	7	4	5	2	5	4	2	3	1	1	7	4	5	2	17.9	17.9	17.9	59.622	543	543;561;129;169	2.57	17
P56695;Q3UN10;F7D926	P56695;Q3UN10	21;19;4	21;19;4	21;19;4	Wolframin	Wfs1	sp|P56695|WFS1_MOUSE Wolframin OS=Mus musculus OX=10090 GN=Wfs1 PE=1 SV=1;tr|Q3UN10|Q3UN10_MOUSE Wolframin OS=Mus musculus OX=10090 GN=Wfs1 PE=1 SV=1	3	21	21	21	0	0	0	21	0	0	0	0	0	0	0	0	0	21	0	0	0	0	0	0	0	0	0	21	0	0	0	0	0	0	31.2	31.2	31.2	100.58	890	890;814;157	1.63	24
P56959;Q8CFQ9;G3UXT7;F6QCI0;G3UZD2;Q91VQ2	P56959;Q8CFQ9;G3UXT7	8;8;7;2;1;1	8;8;7;2;1;1	6;6;5;0;1;1	RNA-binding protein FUS	Fus	sp|P56959|FUS_MOUSE RNA-binding protein FUS OS=Mus musculus OX=10090 GN=Fus PE=1 SV=1;tr|Q8CFQ9|Q8CFQ9_MOUSE Fusion, derived from t(1216) malignant liposarcoma (Human) OS=Mus musculus OX=10090 GN=Fus PE=1 SV=1;tr|G3UXT7|G3UXT7_MOUSE RNA-binding protein FUS	6	8	8	6	2	6	0	0	0	1	3	8	6	8	2	6	0	0	0	1	3	8	6	8	1	4	0	0	0	1	3	6	4	6	20.3	20.3	20.3	52.673	518	518;517;130;324;104;280	2.45	1
P59114	P59114	1	1	1	Phosphorylated CTD-interacting factor 1	Pcif1	sp|P59114|CAPAM_MOUSE mRNA (2-O-methyladenosine-N(6)-)-methyltransferase OS=Mus musculus OX=10090 GN=Pcif1 PE=1 SV=1	1	1	1	1	0	0	0	1	0	0	0	0	0	0	0	0	0	1	0	0	0	0	0	0	0	0	0	1	0	0	0	0	0	0	1.8	1.8	1.8	80.504	706	706	2
P59999;Q3TX55;E9PWA7	P59999;Q3TX55;E9PWA7	3;2;2	3;2;2	3;2;2	Actin-related protein 2/3 complex subunit 4	Arpc4	sp|P59999|ARPC4_MOUSE Actin-related protein 2/3 complex subunit 4 OS=Mus musculus OX=10090 GN=Arpc4 PE=1 SV=3;tr|Q3TX55|Q3TX55_MOUSE Actin-related protein 2/3 complex subunit 4 OS=Mus musculus OX=10090 GN=Arpc4 PE=1 SV=1;tr|E9PWA7|E9PWA7_MOUSE Actin-relate	3	3	3	3	0	0	0	0	0	0	1	3	2	1	0	0	0	0	0	0	1	3	2	1	0	0	0	0	0	0	1	3	2	1	16.1	16.1	16.1	19.667	168	168;78;91	5
P60202	P60202	6	6	6	Myelin proteolipid protein	Plp1	sp|P60202|MYPR_MOUSE Myelin proteolipid protein OS=Mus musculus OX=10090 GN=Plp1 PE=1 SV=2	1	6	6	6	4	4	5	2	2	3	5	5	4	4	4	4	5	2	2	3	5	5	4	4	4	4	5	2	2	3	5	5	4	4	23.8	23.8	23.8	30.077	277	277	3.4	25
P60335	P60335	2	2	1	Poly(rC)-binding protein 1	Pcbp1	sp|P60335|PCBP1_MOUSE Poly(rC)-binding protein 1 OS=Mus musculus OX=10090 GN=Pcbp1 PE=1 SV=1	1	2	2	1	0	0	1	0	0	0	1	1	1	1	0	0	1	0	0	0	1	1	1	1	0	0	0	0	0	0	1	1	1	1	6.7	6.7	3.7	37.497	356	356	4
P60710;P63260;E9Q5F4;E9Q1F2;G3UZ07;G3UYG0;E9Q606;B1ATY1;F8WGM8;E9Q2D1;A0A0U1RQ96;F6WX90	P60710;P63260;E9Q5F4;E9Q1F2;G3UZ07	14;13;10;10;8;5;5;5;4;3;2;1	14;13;10;10;8;5;5;5;4;3;2;1	6;5;3;5;2;1;1;3;3;1;0;0	Actin, cytoplasmic 1;Actin, cytoplasmic 1, N-terminally processed;Actin, cytoplasmic 2;Actin, cytoplasmic 2, N-terminally processed	Actb;Actg1	sp|P60710|ACTB_MOUSE Actin, cytoplasmic 1 OS=Mus musculus OX=10090 GN=Actb PE=1 SV=1;sp|P63260|ACTG_MOUSE Actin, cytoplasmic 2 OS=Mus musculus OX=10090 GN=Actg1 PE=1 SV=1;tr|E9Q5F4|E9Q5F4_MOUSE Actin, cytoplasmic 1 (Fragment) OS=Mus musculus OX=10090 GN=Ac	12	14	14	6	7	10	8	9	5	6	12	11	9	10	7	10	8	9	5	6	12	11	9	10	3	3	3	2	2	3	6	5	4	4	48.8	48.8	21.3	41.736	375	375;375;265;295;268;132;150;153;105;108;195;43	3.55	9
P60867	P60867	1	1	1	40S ribosomal protein S20	Rps20	sp|P60867|RS20_MOUSE 40S ribosomal protein S20 OS=Mus musculus OX=10090 GN=Rps20 PE=1 SV=1	1	1	1	1	0	0	1	0	0	0	0	0	0	0	0	0	1	0	0	0	0	0	0	0	0	0	1	0	0	0	0	0	0	0	9.2	9.2	9.2	13.373	119	119	5
P60879;O09044;B0R029;E9Q8A1;B0R030;Q9D3L3	P60879	10;1;1;1;1;1	10;1;1;1;1;1	10;1;1;1;1;1	Synaptosomal-associated protein 25	Snap25	sp|P60879|SNP25_MOUSE Synaptosomal-associated protein 25 OS=Mus musculus OX=10090 GN=Snap25 PE=1 SV=1	6	10	10	10	0	3	0	1	0	0	7	9	5	3	0	3	0	1	0	0	7	9	5	3	0	3	0	1	0	0	7	9	5	3	62.6	62.6	62.6	23.315	206	206;210;85;98;161;221	5
P61021;Q9CQD1;P35278;A2A5F6;A2A5F5;Q8C266	P61021;Q9CQD1;P35278;A2A5F6;A2A5F5;Q8C266	2;1;1;1;1;1	2;1;1;1;1;1	2;1;1;1;1;1	Ras-related protein Rab-5B;Ras-related protein Rab-5A;Ras-related protein Rab-5C	Rab5b;Rab5a;Rab5c	sp|P61021|RAB5B_MOUSE Ras-related protein Rab-5B OS=Mus musculus OX=10090 GN=Rab5b PE=1 SV=1;sp|Q9CQD1|RAB5A_MOUSE Ras-related protein Rab-5A OS=Mus musculus OX=10090 GN=Rab5a PE=1 SV=1;sp|P35278|RAB5C_MOUSE Ras-related protein Rab-5C OS=Mus musculus OX=10	6	2	2	2	0	0	0	0	0	0	0	2	1	0	0	0	0	0	0	0	0	2	1	0	0	0	0	0	0	0	0	2	1	0	11.6	11.6	11.6	23.707	215	215;215;216;34;83;234	5
P61027	P61027	1	1	1	Ras-related protein Rab-10	Rab10	sp|P61027|RAB10_MOUSE Ras-related protein Rab-10 OS=Mus musculus OX=10090 GN=Rab10 PE=1 SV=1	1	1	1	1	1	1	1	0	0	0	1	1	1	1	1	1	1	0	0	0	1	1	1	1	1	1	1	0	0	0	1	1	1	1	5.5	5.5	5.5	22.541	200	200	5
P61161	P61161	1	1	1	Actin-related protein 2	Actr2	sp|P61161|ARP2_MOUSE Actin-related protein 2 OS=Mus musculus OX=10090 GN=Actr2 PE=1 SV=1	1	1	1	1	0	0	0	0	0	0	0	1	0	0	0	0	0	0	0	0	0	1	0	0	0	0	0	0	0	0	0	1	0	0	3.6	3.6	3.6	44.76	394	394	4
P61205;P84078;Q8BSL7;P84084;P61750;D3YV25;E9Q2C2	P61205;P84078;Q8BSL7	4;4;3;1;1;1;1	4;4;3;1;1;1;1	4;4;3;1;1;1;1	ADP-ribosylation factor 3;ADP-ribosylation factor 1;ADP-ribosylation factor 2	Arf3;Arf1;Arf2	sp|P61205|ARF3_MOUSE ADP-ribosylation factor 3 OS=Mus musculus OX=10090 GN=Arf3 PE=2 SV=2;sp|P84078|ARF1_MOUSE ADP-ribosylation factor 1 OS=Mus musculus OX=10090 GN=Arf1 PE=1 SV=2;sp|Q8BSL7|ARF2_MOUSE ADP-ribosylation factor 2 OS=Mus musculus OX=10090 GN=A	7	4	4	4	1	1	0	0	0	0	3	4	3	0	1	1	0	0	0	0	3	4	3	0	1	1	0	0	0	0	3	4	3	0	32	32	32	20.601	181	181;181;181;180;180;49;64	5
P61226;Q8BU31	P61226	3;1	2;1	1;0	Ras-related protein Rap-2b	Rap2b	sp|P61226|RAP2B_MOUSE Ras-related protein Rap-2b OS=Mus musculus OX=10090 GN=Rap2b PE=1 SV=1	2	3	2	1	0	0	1	0	0	0	3	3	2	0	0	0	1	0	0	0	2	2	2	0	0	0	1	0	0	0	1	1	1	0	16.9	12	6.6	20.504	183	183;183	5
P61264;A0A0U1RNT8;A0A0J9YUA0	P61264	11;4;1	11;4;1	10;4;0	Syntaxin-1B	Stx1b	sp|P61264|STX1B_MOUSE Syntaxin-1B OS=Mus musculus OX=10090 GN=Stx1b PE=1 SV=1	3	11	11	10	1	3	4	4	2	0	4	9	10	10	1	3	4	4	2	0	4	9	10	10	1	3	4	4	2	0	4	8	9	9	38.9	38.9	35.8	33.244	288	288;139;158	4.13
P61982	P61982	5	3	2	14-3-3 protein gamma;14-3-3 protein gamma, N-terminally processed	Ywhag	sp|P61982|1433G_MOUSE 14-3-3 protein gamma OS=Mus musculus OX=10090 GN=Ywhag PE=1 SV=2	1	5	3	2	0	1	2	2	1	1	4	5	3	2	0	1	0	1	0	0	2	3	1	0	0	0	0	0	0	0	1	2	1	0	24.7	17.4	13.4	28.302	247	247	5
P62259;F6WA09	P62259;F6WA09	4;2	2;1	2;1	14-3-3 protein epsilon	Ywhae	sp|P62259|1433E_MOUSE 14-3-3 protein epsilon OS=Mus musculus OX=10090 GN=Ywhae PE=1 SV=1;tr|F6WA09|F6WA09_MOUSE 14-3-3 protein epsilon (Fragment) OS=Mus musculus OX=10090 GN=Ywhae PE=1 SV=1	2	4	2	2	0	0	2	1	1	1	3	4	2	2	0	0	0	0	0	0	1	2	0	0	0	0	0	0	0	0	1	2	0	0	19.2	12.2	12.2	29.174	255	255;154	5
P62320;A0A1W2P7K5	P62320;A0A1W2P7K5	2;1	2;1	2;1	Small nuclear ribonucleoprotein Sm D3	Snrpd3	sp|P62320|SMD3_MOUSE Small nuclear ribonucleoprotein Sm D3 OS=Mus musculus OX=10090 GN=Snrpd3 PE=1 SV=1;tr|A0A1W2P7K5|A0A1W2P7K5_MOUSE Small nuclear ribonucleoprotein Sm D3 OS=Mus musculus OX=10090 GN=Snrpd3 PE=1 SV=1	2	2	2	2	0	2	0	0	0	0	0	2	0	2	0	2	0	0	0	0	0	2	0	2	0	2	0	0	0	0	0	2	0	2	13.5	13.5	13.5	13.916	126	126;84	5
P62342	P62342	3	3	3	Selenoprotein T	Selt	sp|P62342|SELT_MOUSE Thioredoxin reductase-like selenoprotein T OS=Mus musculus OX=10090 GN=Selenot PE=1 SV=2	1	3	3	3	0	0	3	0	0	0	0	0	0	0	0	0	3	0	0	0	0	0	0	0	0	0	3	0	0	0	0	0	0	0	22.6	22.6	22.6	22.292	195	195	5
P62482;E0CXZ9;Q3UPV6;A0A571BGH0;A0A571BF54;A0A571BEM7;E0CXI4;A0A571BFX6;A0A571BE49;P63143;E0CYS2;A0A5F8MPA4;A0A5F8MPK0	P62482;E0CXZ9;Q3UPV6;A0A571BGH0;A0A571BF54;A0A571BEM7	8;7;7;7;7;6;3;2;2;1;1;1;1	8;7;7;7;7;6;3;2;2;1;1;1;1	8;7;7;7;7;6;3;2;2;1;1;1;1	Voltage-gated potassium channel subunit beta-2	Kcnab2	sp|P62482|KCAB2_MOUSE Voltage-gated potassium channel subunit beta-2 OS=Mus musculus OX=10090 GN=Kcnab2 PE=1 SV=1;tr|E0CXZ9|E0CXZ9_MOUSE K(+) channel subunit beta-1 OS=Mus musculus OX=10090 GN=Kcnab2 PE=1 SV=2;tr|Q3UPV6|Q3UPV6_MOUSE K(+) channel subunit be	13	8	8	8	1	1	2	1	0	0	4	4	6	6	1	1	2	1	0	0	4	4	6	6	1	1	2	1	0	0	4	4	6	6	26.2	26.2	26.2	41.021	367	367;300;353;382;398;415;134;51;56;401;38;408;419	4
P62631	P62631	4	1	1	Elongation factor 1-alpha 2	Eef1a2	sp|P62631|EF1A2_MOUSE Elongation factor 1-alpha 2 OS=Mus musculus OX=10090 GN=Eef1a2 PE=1 SV=1	1	4	1	1	2	2	1	1	0	0	3	3	3	4	1	0	0	0	0	0	0	1	0	1	1	0	0	0	0	0	0	1	0	1	11.9	5.2	5.2	50.454	463	463	3
P62702;V9GWY0	P62702;V9GWY0	1;1	1;1	1;1	40S ribosomal protein S4, X isoform;40S ribosomal protein S4	Rps4x;Gm15013	sp|P62702|RS4X_MOUSE 40S ribosomal protein S4, X isoform OS=Mus musculus OX=10090 GN=Rps4x PE=1 SV=2;tr|V9GWY0|V9GWY0_MOUSE 40S ribosomal protein S4 OS=Mus musculus OX=10090 GN=Gm15013 PE=3 SV=1	2	1	1	1	0	0	1	0	0	0	1	0	1	0	0	0	1	0	0	0	1	0	1	0	0	0	1	0	0	0	1	0	1	0	3.4	3.4	3.4	29.597	263	263;266	5
P62761	P62761	1	1	1	Visinin-like protein 1	Vsnl1	sp|P62761|VISL1_MOUSE Visinin-like protein 1 OS=Mus musculus OX=10090 GN=Vsnl1 PE=1 SV=2	1	1	1	1	0	0	0	0	0	0	1	1	1	0	0	0	0	0	0	0	1	1	1	0	0	0	0	0	0	0	1	1	1	0	6.3	6.3	6.3	22.142	191	191	5
P62814;Q91YH6;A0A0U1RNU9	P62814	7;2;1	7;2;1	7;2;1	V-type proton ATPase subunit B, brain isoform	Atp6v1b2	sp|P62814|VATB2_MOUSE V-type proton ATPase subunit B, brain isoform OS=Mus musculus OX=10090 GN=Atp6v1b2 PE=1 SV=1	3	7	7	7	0	0	0	0	0	0	1	5	0	3	0	0	0	0	0	0	1	5	0	3	0	0	0	0	0	0	1	5	0	3	16	16	16	56.55	511	511;513;215	3
P62821;Q5SW87;Q5SW88	P62821;Q5SW87;Q5SW88	1;1;1	1;1;1	1;1;1	Ras-related protein Rab-1A	Rab1A;Rab1	sp|P62821|RAB1A_MOUSE Ras-related protein Rab-1A OS=Mus musculus OX=10090 GN=Rab1A PE=1 SV=3;tr|Q5SW87|Q5SW87_MOUSE RAB1A, member RAS oncogene family OS=Mus musculus OX=10090 GN=Rab1a PE=1 SV=1;tr|Q5SW88|Q5SW88_MOUSE RAB1A, member RAS oncogene family OS=Mu	3	1	1	1	0	1	0	0	0	0	1	1	0	0	0	1	0	0	0	0	1	1	0	0	0	1	0	0	0	0	1	1	0	0	7.8	7.8	7.8	22.677	205	205;138;202	5
P62881	P62881	3	3	3	Guanine nucleotide-binding protein subunit beta-5	Gnb5	sp|P62881|GNB5_MOUSE Guanine nucleotide-binding protein subunit beta-5 OS=Mus musculus OX=10090 GN=Gnb5 PE=1 SV=1	1	3	3	3	0	0	2	1	0	0	3	1	0	3	0	0	2	1	0	0	3	1	0	3	0	0	2	1	0	0	3	1	0	3	8.1	8.1	8.1	43.565	395	395	4
P62908;A0A140LI77;D3YV43	P62908;A0A140LI77;D3YV43	6;5;5	6;5;5	6;5;5	40S ribosomal protein S3	Rps3	sp|P62908|RS3_MOUSE 40S ribosomal protein S3 OS=Mus musculus OX=10090 GN=Rps3 PE=1 SV=1;tr|A0A140LI77|A0A140LI77_MOUSE 40S ribosomal protein S3 OS=Mus musculus OX=10090 GN=Rps3 PE=1 SV=1;tr|D3YV43|D3YV43_MOUSE 40S ribosomal protein S3 OS=Mus musculus OX=10	3	6	6	6	0	0	6	0	0	0	0	0	0	0	0	0	6	0	0	0	0	0	0	0	0	0	6	0	0	0	0	0	0	0	26.3	26.3	26.3	26.674	243	243;144;191	4.86
P63001;Q3TLP8;Q05144;P60764;A0A2R8VHH0;A2AC13	P63001;Q3TLP8	3;3;1;1;1;1	3;3;1;1;1;1	3;3;1;1;1;1	Ras-related C3 botulinum toxin substrate 1	Rac1	sp|P63001|RAC1_MOUSE Ras-related C3 botulinum toxin substrate 1 OS=Mus musculus OX=10090 GN=Rac1 PE=1 SV=1;tr|Q3TLP8|Q3TLP8_MOUSE Ras-related C3 botulinum toxin substrate 1 OS=Mus musculus OX=10090 GN=Rac1 PE=1 SV=1	6	3	3	3	0	0	1	0	0	0	2	3	2	0	0	0	1	0	0	0	2	3	2	0	0	0	1	0	0	0	2	3	2	0	12	12	12	21.45	192	192;211;192;192;80;185	5
P63011;D3YZP5	P63011	5;1	5;1	4;1	Ras-related protein Rab-3A	Rab3a	sp|P63011|RAB3A_MOUSE Ras-related protein Rab-3A OS=Mus musculus OX=10090 GN=Rab3a PE=1 SV=1	2	5	5	4	0	1	0	0	0	0	4	5	2	2	0	1	0	0	0	0	4	5	2	2	0	1	0	0	0	0	3	4	2	2	35.5	35.5	26.8	24.97	220	220;62	5
P63017;Q504P4;P17156;D3Z5E2;Q61696;P16627;P17879	P63017;Q504P4	23;22;7;6;2;2;2	23;22;7;6;2;2;2	22;21;6;6;2;1;2	Heat shock cognate 71 kDa protein	Hspa8	sp|P63017|HSP7C_MOUSE Heat shock cognate 71 kDa protein OS=Mus musculus OX=10090 GN=Hspa8 PE=1 SV=1;tr|Q504P4|Q504P4_MOUSE Heat shock cognate 71 kDa protein OS=Mus musculus OX=10090 GN=Hspa8 PE=1 SV=1	7	23	23	22	8	15	13	9	5	5	19	22	17	17	8	15	13	9	5	5	19	22	17	17	8	14	12	9	5	5	18	21	16	16	40.7	40.7	40.7	70.87	646	646;627;633;116;641;641;642	2.01
P63038;D3Z7J9;D3Z2F2	P63038	11;3;3	11;3;3	11;3;3	60 kDa heat shock protein, mitochondrial	Hspd1	sp|P63038|CH60_MOUSE 60 kDa heat shock protein, mitochondrial OS=Mus musculus OX=10090 GN=Hspd1 PE=1 SV=1	3	11	11	11	6	3	0	0	0	0	6	9	2	7	6	3	0	0	0	0	6	9	2	7	6	3	0	0	0	0	6	9	2	7	28.1	28.1	28.1	60.955	573	573;142;202	3.03
P63085;A0A338P736;A0A338P781;Q63844;D3Z6D8;A0A0U1RPX4;D3Z3G6;Q61532;Q6P5G0;E9PXX5;A0A0U1RPZ0;E9Q3I6	P63085	13;5;3;2;2;2;2;1;1;1;1;1	13;5;3;2;2;2;2;1;1;1;1;1	13;5;3;2;2;2;2;1;1;1;1;1	Mitogen-activated protein kinase 1	Mapk1	sp|P63085|MK01_MOUSE Mitogen-activated protein kinase 1 OS=Mus musculus OX=10090 GN=Mapk1 PE=1 SV=3	12	13	13	13	0	0	12	6	0	0	2	4	4	4	0	0	12	6	0	0	2	4	4	4	0	0	12	6	0	0	2	4	4	4	34.9	34.9	34.9	41.275	358	358;134;108;380;265;335;380;720;583;193;214;233	4.03
P63094;Q6R0H7;Z4YKV1;A0A571BEM2;A0A571BEI3;A0A571BE25	P63094;Q6R0H7;Z4YKV1;A0A571BEM2;A0A571BEI3	3;3;3;2;2;1	2;2;2;2;2;1	2;2;2;2;2;1	Guanine nucleotide-binding protein G(s) subunit alpha isoforms short;Guanine nucleotide-binding protein G(s) subunit alpha isoforms XLas	Gnas	sp|P63094|GNAS2_MOUSE Guanine nucleotide-binding protein G(s) subunit alpha isoforms short OS=Mus musculus OX=10090 GN=Gnas PE=1 SV=1;sp|Q6R0H7|GNAS1_MOUSE Guanine nucleotide-binding protein G(s) subunit alpha isoforms XLas OS=Mus musculus OX=10090 GN=Gnas	6	3	2	2	1	0	1	1	1	1	3	2	1	1	0	0	0	0	0	0	2	1	0	0	0	0	0	0	0	0	2	1	0	0	7.6	4.8	4.8	45.663	394	394;1133;379;237;335;153	3.67
P63101;A0A2I3BQ03;D3YXN6;Q9CQV8;O70456;D3YXF4;D3YW45;D6REF3;A2A5N1	P63101;A0A2I3BQ03	9;7;3;2;2;2;1;1;1	9;7;3;2;2;2;1;1;1	7;6;2;0;0;2;1;0;0	14-3-3 protein zeta/delta	Ywhaz	sp|P63101|1433Z_MOUSE 14-3-3 protein zeta/delta OS=Mus musculus OX=10090 GN=Ywhaz PE=1 SV=1;tr|A0A2I3BQ03|A0A2I3BQ03_MOUSE 14-3-3 protein zeta/delta (Fragment) OS=Mus musculus OX=10090 GN=Ywhaz PE=1 SV=1	9	9	9	7	0	2	5	1	1	2	7	8	4	4	0	2	5	1	1	2	7	8	4	4	0	2	3	0	0	1	5	6	2	2	42	42	34.7	27.771	245	245;166;88;246;248;44;26;130;159	5
P63141	P63141	5	5	1	Potassium voltage-gated channel subfamily A member 2	Kcna2	sp|P63141|KCNA2_MOUSE Potassium voltage-gated channel subfamily A member 2 OS=Mus musculus OX=10090 GN=Kcna2 PE=1 SV=1	1	5	5	1	0	0	1	0	0	0	5	5	2	4	0	0	1	0	0	0	5	5	2	4	0	0	0	0	0	0	1	1	0	1	12.6	12.6	3	56.7	499	499	1.89	2
P63318;Q2NKI4	P63318;Q2NKI4	11;8	11;8	10;7	Protein kinase C gamma type;Protein kinase C	Prkcg	sp|P63318|KPCG_MOUSE Protein kinase C gamma type OS=Mus musculus OX=10090 GN=Prkcg PE=1 SV=1;tr|Q2NKI4|Q2NKI4_MOUSE Protein kinase C OS=Mus musculus OX=10090 GN=Prkcg PE=1 SV=1	2	11	11	10	7	3	2	0	0	0	10	6	9	10	7	3	2	0	0	0	10	6	9	10	7	3	2	0	0	0	9	6	8	9	23.5	23.5	21.2	78.357	697	697;646	2.11
P63328	P63328	15	15	9	Serine/threonine-protein phosphatase 2B catalytic subunit alpha isoform	Ppp3ca	sp|P63328|PP2BA_MOUSE Serine/threonine-protein phosphatase 2B catalytic subunit alpha isoform OS=Mus musculus OX=10090 GN=Ppp3ca PE=1 SV=1	1	15	15	9	1	4	2	0	0	0	14	15	8	11	1	4	2	0	0	0	14	15	8	11	1	2	0	0	0	0	8	9	3	5	36.5	36.5	21.9	58.643	521	521	3.56	8
P63330;P62715	P63330;P62715	4;3	4;3	4;3	Serine/threonine-protein phosphatase 2A catalytic subunit alpha isoform;Serine/threonine-protein phosphatase 2A catalytic subunit beta isoform	Ppp2ca;Ppp2cb	sp|P63330|PP2AA_MOUSE Serine/threonine-protein phosphatase 2A catalytic subunit alpha isoform OS=Mus musculus OX=10090 GN=Ppp2ca PE=1 SV=1;sp|P62715|PP2AB_MOUSE Serine/threonine-protein phosphatase 2A catalytic subunit beta isoform OS=Mus musculus OX=10090	2	4	4	4	0	0	0	4	0	0	0	2	1	2	0	0	0	4	0	0	0	2	1	2	0	0	0	4	0	0	0	2	1	2	17.5	17.5	17.5	35.608	309	309;309	4.09
P67778;Q5SQG5	P67778;Q5SQG5	4;4	4;4	4;4	Prohibitin	Phb	sp|P67778|PHB_MOUSE Prohibitin OS=Mus musculus OX=10090 GN=Phb PE=1 SV=1;tr|Q5SQG5|Q5SQG5_MOUSE Prohibitin (Fragment) OS=Mus musculus OX=10090 GN=Phb PE=1 SV=1	2	4	4	4	3	3	0	0	0	1	2	3	4	4	3	3	0	0	0	1	2	3	4	4	3	3	0	0	0	1	2	3	4	4	15.8	15.8	15.8	29.82	272	272;207	5
P68134;P68033;P62737;P63268;A0A1D5RM20;D3Z2K3;A0A494B9T3;D3YZY0	P68134;P68033;P62737;P63268;A0A1D5RM20;D3Z2K3;A0A494B9T3;D3YZY0	8;8;7;7;5;5;5;5	1;1;1;1;1;1;1;1	1;1;1;1;1;1;1;1	Actin, alpha skeletal muscle;Actin, alpha cardiac muscle 1;Actin, aortic smooth muscle;Actin, gamma-enteric smooth muscle	Acta1;Actc1;Acta2;Actg2	sp|P68134|ACTS_MOUSE Actin, alpha skeletal muscle OS=Mus musculus OX=10090 GN=Acta1 PE=1 SV=1;sp|P68033|ACTC_MOUSE Actin, alpha cardiac muscle 1 OS=Mus musculus OX=10090 GN=Actc1 PE=1 SV=1;sp|P62737|ACTA_MOUSE Actin, aortic smooth muscle OS=Mus musculus OX	8	8	1	1	4	7	5	7	4	2	6	6	5	6	1	1	1	1	1	0	1	1	1	1	1	1	1	1	1	0	1	1	1	1	23.6	4.2	4.2	42.051	377	377;377;377;376;151;195;214;221	3.73
P68181;A0A0G2JFT9;H6TMF5	P68181;A0A0G2JFT9;H6TMF5	4;2;2	1;1;1	1;1;1	cAMP-dependent protein kinase catalytic subunit beta	Prkacb	sp|P68181|KAPCB_MOUSE cAMP-dependent protein kinase catalytic subunit beta OS=Mus musculus OX=10090 GN=Prkacb PE=1 SV=2;tr|A0A0G2JFT9|A0A0G2JFT9_MOUSE cAMP-dependent protein kinase catalytic subunit beta (Fragment) OS=Mus musculus OX=10090 GN=Prkacb PE=1 S	3	4	1	1	0	0	0	0	0	0	1	4	1	2	0	0	0	0	0	0	0	1	0	0	0	0	0	0	0	0	0	1	0	0	11.7	3.4	3.4	40.707	351	351;106;189	4
P68254	P68254	6	4	4	14-3-3 protein theta	Ywhaq	sp|P68254|1433T_MOUSE 14-3-3 protein theta OS=Mus musculus OX=10090 GN=Ywhaq PE=1 SV=1	1	6	4	4	0	0	2	1	1	1	4	6	3	2	0	0	0	0	0	0	2	4	1	0	0	0	0	0	0	0	2	4	1	0	33.5	26.1	26.1	27.778	245	245	5
P68369;P05214	P68369;P05214	15;13	15;13	1;1	Tubulin alpha-1A chain;Tubulin alpha-3 chain	Tuba1a;Tuba3a	sp|P68369|TBA1A_MOUSE Tubulin alpha-1A chain OS=Mus musculus OX=10090 GN=Tuba1a PE=1 SV=1;sp|P05214|TBA3_MOUSE Tubulin alpha-3 chain OS=Mus musculus OX=10090 GN=Tuba3a PE=1 SV=1	2	15	15	1	11	12	11	10	4	4	13	12	11	12	11	12	11	10	4	4	13	12	11	12	1	1	1	0	1	0	1	1	1	1	44.1	44.1	3.1	50.135	451	451;450	2.81	32
P68372;A2AQ07;G3UZR1;CON__ENSEMBL:ENSBTAP00000025008	P68372	19;3;3;3	19;3;3;3	1;0;0;0	Tubulin beta-4B chain	Tubb4b	sp|P68372|TBB4B_MOUSE Tubulin beta-4B chain OS=Mus musculus OX=10090 GN=Tubb4b PE=1 SV=1	4	19	19	1	13	15	12	11	2	2	14	15	15	17	13	15	12	11	2	2	14	15	15	17	1	1	1	0	0	0	1	1	1	1	54.4	54.4	2.7	49.83	445	445;451;66;536	3.13	11
P68373;Q9JJZ2	P68373;Q9JJZ2	15;10	1;1	0;0	Tubulin alpha-1C chain;Tubulin alpha-8 chain	Tuba1c;Tuba8	sp|P68373|TBA1C_MOUSE Tubulin alpha-1C chain OS=Mus musculus OX=10090 GN=Tuba1c PE=1 SV=1;sp|Q9JJZ2|TBA8_MOUSE Tubulin alpha-8 chain OS=Mus musculus OX=10090 GN=Tuba8 PE=1 SV=1	2	15	1	0	11	12	11	10	4	4	13	12	11	12	1	1	1	0	1	0	1	1	1	1	0	0	0	0	0	0	0	0	0	0	44.3	3.1	0	49.909	449	449;449	2.93	2
P68404	P68404	3	1	1	Protein kinase C beta type	Prkcb	sp|P68404|KPCB_MOUSE Protein kinase C beta type OS=Mus musculus OX=10090 GN=Prkcb PE=1 SV=4	1	3	1	1	2	1	0	0	0	0	2	2	2	2	0	0	0	0	0	0	1	0	1	1	0	0	0	0	0	0	1	0	1	1	5.7	1.5	1.5	76.75	671	671	2
P68510	P68510	4	1	1	14-3-3 protein eta	Ywhah	sp|P68510|1433F_MOUSE 14-3-3 protein eta OS=Mus musculus OX=10090 GN=Ywhah PE=1 SV=2	1	4	1	1	0	1	2	2	1	2	3	4	3	2	0	0	0	0	0	1	0	1	1	0	0	0	0	0	0	1	0	1	1	0	17.1	5.7	5.7	28.211	246	246	4.67
P70168	P70168	5	5	5	Importin subunit beta-1	Kpnb1	sp|P70168|IMB1_MOUSE Importin subunit beta-1 OS=Mus musculus OX=10090 GN=Kpnb1 PE=1 SV=2	1	5	5	5	0	0	0	0	0	0	3	5	0	1	0	0	0	0	0	0	3	5	0	1	0	0	0	0	0	0	3	5	0	1	7.3	7.3	7.3	97.183	876	876	1.9	1
P70404	P70404	3	3	3	Isocitrate dehydrogenase [NAD] subunit gamma 1, mitochondrial	Idh3g	sp|P70404|IDHG1_MOUSE Isocitrate dehydrogenase [NAD] subunit gamma 1, mitochondrial OS=Mus musculus OX=10090 GN=Idh3g PE=1 SV=1	1	3	3	3	0	0	2	0	0	0	0	1	2	2	0	0	2	0	0	0	0	1	2	2	0	0	2	0	0	0	0	1	2	2	10.7	10.7	10.7	42.785	393	393	4
P70452;D6RJ29	P70452;D6RJ29	2;1	2;1	2;1	Syntaxin-4	Stx4;Stx4a	sp|P70452|STX4_MOUSE Syntaxin-4 OS=Mus musculus OX=10090 GN=Stx4 PE=1 SV=1;tr|D6RJ29|D6RJ29_MOUSE Syntaxin 4A (placental) OS=Mus musculus OX=10090 GN=Stx4a PE=1 SV=1	2	2	2	2	0	0	0	0	0	0	0	2	0	0	0	0	0	0	0	0	0	2	0	0	0	0	0	0	0	0	0	2	0	0	6.7	6.7	6.7	34.165	298	298;47	4
P84091;Q3TWV4;A0A338P6T4	P84091;Q3TWV4	3;3;1	3;3;1	3;3;1	AP-2 complex subunit mu	Ap2m1	sp|P84091|AP2M1_MOUSE AP-2 complex subunit mu OS=Mus musculus OX=10090 GN=Ap2m1 PE=1 SV=1;tr|Q3TWV4|Q3TWV4_MOUSE AP-2 complex subunit mu OS=Mus musculus OX=10090 GN=Ap2m1 PE=1 SV=1	3	3	3	3	1	1	0	0	0	0	0	3	0	3	1	1	0	0	0	0	0	3	0	3	1	1	0	0	0	0	0	3	0	3	8.7	8.7	8.7	49.654	435	435;433;119	3
P97765	P97765	1	1	1	WW domain-binding protein 2	Wbp2	sp|P97765|WBP2_MOUSE WW domain-binding protein 2 OS=Mus musculus OX=10090 GN=Wbp2 PE=1 SV=1	1	1	1	1	0	0	0	0	0	0	1	1	0	0	0	0	0	0	0	0	1	1	0	0	0	0	0	0	0	0	1	1	0	0	3.4	3.4	3.4	28.032	261	261	4
P97807	P97807	2	2	2	Fumarate hydratase, mitochondrial	Fh	sp|P97807|FUMH_MOUSE Fumarate hydratase, mitochondrial OS=Mus musculus OX=10090 GN=Fh PE=1 SV=3	1	2	2	2	0	0	0	0	0	0	0	2	0	0	0	0	0	0	0	0	0	2	0	0	0	0	0	0	0	0	0	2	0	0	4.7	4.7	4.7	54.356	507	507	3
P98086	P98086	9	9	9	Complement C1q subcomponent subunit A	C1qa	sp|P98086|C1QA_MOUSE Complement C1q subcomponent subunit A OS=Mus musculus OX=10090 GN=C1qa PE=1 SV=2	1	9	9	9	2	5	2	4	4	5	5	5	3	5	2	5	2	4	4	5	5	5	3	5	2	5	2	4	4	5	5	5	3	5	34.3	34.3	34.3	25.974	245	245	4.42	3
P99024;A0A1D5RM76	P99024	18;1	3;0	3;0	Tubulin beta-5 chain	Tubb5	sp|P99024|TBB5_MOUSE Tubulin beta-5 chain OS=Mus musculus OX=10090 GN=Tubb5 PE=1 SV=1	2	18	3	3	10	12	11	10	2	2	13	13	13	15	0	0	0	0	0	0	1	1	1	2	0	0	0	0	0	0	1	1	1	2	50.7	9.9	9.9	49.67	444	444;122	3
Q01853	Q01853	3	3	3	Transitional endoplasmic reticulum ATPase	Vcp	sp|Q01853|TERA_MOUSE Transitional endoplasmic reticulum ATPase OS=Mus musculus OX=10090 GN=Vcp PE=1 SV=4	1	3	3	3	0	0	3	0	0	0	0	1	0	0	0	0	3	0	0	0	0	1	0	0	0	0	3	0	0	0	0	1	0	0	4.8	4.8	4.8	89.321	806	806	2
Q02105	Q02105	5	5	5	Complement C1q subcomponent subunit C	C1qc	sp|Q02105|C1QC_MOUSE Complement C1q subcomponent subunit C OS=Mus musculus OX=10090 GN=C1qc PE=1 SV=2	1	5	5	5	3	3	2	3	3	4	5	3	4	5	3	3	2	3	3	4	5	3	4	5	3	3	2	3	3	4	5	3	4	5	21.1	21.1	21.1	25.991	246	246	4.72	1
Q02257	Q02257	4	4	4	Junction plakoglobin	Jup	sp|Q02257|PLAK_MOUSE Junction plakoglobin OS=Mus musculus OX=10090 GN=Jup PE=1 SV=3	1	4	4	4	2	0	0	1	0	0	3	0	1	1	2	0	0	1	0	0	3	0	1	1	2	0	0	1	0	0	3	0	1	1	6	6	6	81.8	745	745	3	2
Q03137	Q03137	1	1	1	Ephrin type-A receptor 4	Epha4	sp|Q03137|EPHA4_MOUSE Ephrin type-A receptor 4 OS=Mus musculus OX=10090 GN=Epha4 PE=1 SV=2	1	1	1	1	0	0	0	0	0	0	1	0	0	0	0	0	0	0	0	0	1	0	0	0	0	0	0	0	0	0	1	0	0	0	1.1	1.1	1.1	109.81	986	986	2
Q03265;D3Z6F5;D6RJ16	Q03265;D3Z6F5	25;24;2	25;24;2	25;24;2	ATP synthase subunit alpha, mitochondrial;ATP synthase subunit alpha	Atp5a1	sp|Q03265|ATPA_MOUSE ATP synthase subunit alpha, mitochondrial OS=Mus musculus OX=10090 GN=Atp5f1a PE=1 SV=1;tr|D3Z6F5|D3Z6F5_MOUSE ATP synthase subunit alpha OS=Mus musculus OX=10090 GN=Atp5a1 PE=1 SV=1	3	25	25	25	17	13	7	2	1	1	16	18	15	18	17	13	7	2	1	1	16	18	15	18	17	13	7	2	1	1	16	18	15	18	53.5	53.5	53.5	59.752	553	553;503;89	3.12	7
Q04447	Q04447	3	3	3	Creatine kinase B-type	Ckb	sp|Q04447|KCRB_MOUSE Creatine kinase B-type OS=Mus musculus OX=10090 GN=Ckb PE=1 SV=1	1	3	3	3	0	0	0	0	0	0	0	3	0	3	0	0	0	0	0	0	0	3	0	3	0	0	0	0	0	0	0	3	0	3	10	10	10	42.713	381	381	3
Q3UN27;Q10738	Q3UN27;Q10738	1;1	1;1	1;1	Matrilysin	Mmp7	tr|Q3UN27|Q3UN27_MOUSE Matrilysin OS=Mus musculus OX=10090 GN=Mmp7 PE=1 SV=1;sp|Q10738|MMP7_MOUSE Matrilysin OS=Mus musculus OX=10090 GN=Mmp7 PE=2 SV=1	2	1	1	1	0	0	0	0	0	0	0	0	0	1	0	0	0	0	0	0	0	0	0	1	0	0	0	0	0	0	0	0	0	1	3.7	3.7	3.7	30.028	267	267;264	2	1
Q99020;Q20BD0;Q80XR6	Q99020;Q20BD0;Q80XR6	2;2;2	2;2;2	2;2;2	Heterogeneous nuclear ribonucleoprotein A/B	Hnrnpab	sp|Q99020|ROAA_MOUSE Heterogeneous nuclear ribonucleoprotein A/B OS=Mus musculus OX=10090 GN=Hnrnpab PE=1 SV=1;tr|Q20BD0|Q20BD0_MOUSE Heterogeneous nuclear ribonucleoprotein A/B OS=Mus musculus OX=10090 GN=Hnrnpab PE=1 SV=1;tr|Q80XR6|Q80XR6_MOUSE Heterogen	3	2	2	2	0	0	2	0	0	0	0	1	0	0	0	0	2	0	0	0	0	1	0	0	0	0	2	0	0	0	0	1	0	0	7.7	7.7	7.7	30.831	285	285;332;311	4
Q9EPJ9;Q3TGS9;V9GWV1;V9GXM1	Q9EPJ9;Q3TGS9;V9GWV1;V9GXM1	1;1;1;1	1;1;1;1	1;1;1;1	ADP-ribosylation factor GTPase-activating protein 1	Arfgap1	sp|Q9EPJ9|ARFG1_MOUSE ADP-ribosylation factor GTPase-activating protein 1 OS=Mus musculus OX=10090 GN=Arfgap1 PE=1 SV=2;tr|Q3TGS9|Q3TGS9_MOUSE ADP-ribosylation factor GTPase-activating protein 1 OS=Mus musculus OX=10090 GN=Arfgap1 PE=1 SV=1;tr|V9GWV1|V9GWV	4	1	1	1	0	0	0	0	0	0	0	1	0	0	0	0	0	0	0	0	0	1	0	0	0	0	0	0	0	0	0	1	0	0	2.2	2.2	2.2	45.288	414	414;394;402;424	3
Q3TZ89	Q3TZ89	1	1	1	Protein transport protein Sec31B	Sec31b	sp|Q3TZ89|SC31B_MOUSE Protein transport protein Sec31B OS=Mus musculus OX=10090 GN=Sec31b PE=1 SV=2	1	1	1	1	0	0	1	1	1	1	0	0	1	1	0	0	1	1	1	1	0	0	1	1	0	0	1	1	1	1	0	0	1	1	0.9	0.9	0.9	125.63	1158	1158	3.07	2
Q9CYH2;Q3U125;D3Z0A8;D3YYG8;D3Z398;D3Z252	Q9CYH2;Q3U125;D3Z0A8;D3YYG8;D3Z398;D3Z252	2;2;1;1;1;1	2;2;1;1;1;1	2;2;1;1;1;1	Redox-regulatory protein FAM213A	Fam213a	sp|Q9CYH2|PXL2A_MOUSE Peroxiredoxin-like 2A OS=Mus musculus OX=10090 GN=Prxl2a PE=1 SV=2;tr|Q3U125|Q3U125_MOUSE Peroxiredoxin-like 2 activated in M-CSF stimulated monocytes OS=Mus musculus OX=10090 GN=Prxl2a PE=1 SV=1;tr|D3Z0A8|D3Z0A8_MOUSE Peroxiredoxin-l	6	2	2	2	0	0	0	0	0	0	1	2	0	0	0	0	0	0	0	0	1	2	0	0	0	0	0	0	0	0	1	2	0	0	11	11	11	24.394	218	218;229;103;174;176;203	5
Q3U213	Q3U213	2	2	2	Protein SERAC1	Serac1	sp|Q3U213|SRAC1_MOUSE Protein SERAC1 OS=Mus musculus OX=10090 GN=Serac1 PE=2 SV=1	1	2	2	2	0	0	0	0	0	0	2	1	0	0	0	0	0	0	0	0	2	1	0	0	0	0	0	0	0	0	2	1	0	0	3.2	3.2	3.2	73.987	654	654	2.33
Q3UGF1	Q3UGF1	1	1	1	WD repeat-containing protein 19	Wdr19	sp|Q3UGF1|WDR19_MOUSE WD repeat-containing protein 19 OS=Mus musculus OX=10090 GN=Wdr19 PE=1 SV=1	1	1	1	1	0	0	0	1	1	0	0	0	0	0	0	0	0	1	1	0	0	0	0	0	0	0	0	1	1	0	0	0	0	0	1.1	1.1	1.1	151.46	1341	1341	2.33	1
Q3UHD3;D3YZ69;D3YUM9;D3YY58	Q3UHD3;D3YZ69	21;11;5;4	21;11;5;4	21;11;5;4	Microtubule-associated tumor suppressor candidate 2 homolog	Mtus2	sp|Q3UHD3|MTUS2_MOUSE Microtubule-associated tumor suppressor candidate 2 homolog OS=Mus musculus OX=10090 GN=Mtus2 PE=1 SV=1;tr|D3YZ69|D3YZ69_MOUSE Microtubule-associated tumor suppressor candidate 2 homolog OS=Mus musculus OX=10090 GN=Mtus2 PE=1 SV=1	4	21	21	21	0	0	0	0	0	0	0	0	15	20	0	0	0	0	0	0	0	0	15	20	0	0	0	0	0	0	0	0	15	20	17.3	17.3	17.3	147.35	1353	1353;315;170;205	2.1	27
Q8VE33;Q3USC7;A2A5H8	Q8VE33;Q3USC7;A2A5H8	2;2;1	2;2;1	2;2;1	Ganglioside-induced differentiation-associated protein 1-like 1	Gdap1l1	sp|Q8VE33|GD1L1_MOUSE Ganglioside-induced differentiation-associated protein 1-like 1 OS=Mus musculus OX=10090 GN=Gdap1l1 PE=1 SV=1;tr|Q3USC7|Q3USC7_MOUSE Ganglioside-induced differentiation-associated protein 1-like 1 OS=Mus musculus OX=10090 GN=Gdap1l1 P	3	2	2	2	0	0	0	0	0	0	0	2	0	0	0	0	0	0	0	0	0	2	0	0	0	0	0	0	0	0	0	2	0	0	8.6	8.6	8.6	42.317	370	370;367;266	4
Q61885;Q3UY21;Q29ZQ5	Q61885;Q3UY21;Q29ZQ5	4;4;2	4;4;2	4;4;2	Myelin-oligodendrocyte glycoprotein	Mog	sp|Q61885|MOG_MOUSE Myelin-oligodendrocyte glycoprotein OS=Mus musculus OX=10090 GN=Mog PE=1 SV=1;tr|Q3UY21|Q3UY21_MOUSE Myelin-oligodendrocyte glycoprotein OS=Mus musculus OX=10090 GN=Mog PE=1 SV=1;tr|Q29ZQ5|Q29ZQ5_MOUSE Myelin-oligodendrocyte glycoprotei	3	4	4	4	0	1	2	1	0	0	3	3	2	0	0	1	2	1	0	0	3	3	2	0	0	1	2	1	0	0	3	3	2	0	13.8	13.8	13.8	28.271	246	246;247;208	5
Q9Z140;Q3UYN2;E9QA77	Q9Z140;Q3UYN2	4;4;1	4;4;1	3;3;1	Copine-6	Cpne6	sp|Q9Z140|CPNE6_MOUSE Copine-6 OS=Mus musculus OX=10090 GN=Cpne6 PE=1 SV=1;tr|Q3UYN2|Q3UYN2_MOUSE Copine-6 OS=Mus musculus OX=10090 GN=Cpne6 PE=1 SV=1	3	4	4	3	1	0	3	1	1	0	3	2	1	2	1	0	3	1	1	0	3	2	1	2	0	0	2	0	0	0	2	1	0	1	7.2	7.2	5.6	61.78	557	557;556;126	2.5
Q61151;Q3UZJ4;A0A1W2P7D8	Q61151;Q3UZJ4;A0A1W2P7D8	2;2;1	2;2;1	2;2;1	Serine/threonine-protein phosphatase 2A 56 kDa regulatory subunit epsilon isoform	Ppp2r5e	sp|Q61151|2A5E_MOUSE Serine/threonine-protein phosphatase 2A 56 kDa regulatory subunit epsilon isoform OS=Mus musculus OX=10090 GN=Ppp2r5e PE=1 SV=3;tr|Q3UZJ4|Q3UZJ4_MOUSE Serine/threonine-protein phosphatase 2A 56 kDa regulatory subunit OS=Mus musculus OX	3	2	2	2	0	0	0	2	0	0	0	0	0	0	0	0	0	2	0	0	0	0	0	0	0	0	0	2	0	0	0	0	0	0	5.8	5.8	5.8	54.713	467	467;433;63	2.33	1
Q4VA93;P20444;Q3TQ39	Q4VA93;P20444	5;4;2	4;3;2	2;2;1	Protein kinase C;Protein kinase C alpha type	Prkca	tr|Q4VA93|Q4VA93_MOUSE Protein kinase C OS=Mus musculus OX=10090 GN=Prkca PE=1 SV=1;sp|P20444|KPCA_MOUSE Protein kinase C alpha type OS=Mus musculus OX=10090 GN=Prkca PE=1 SV=3	3	5	4	2	2	1	0	0	0	0	3	2	4	4	2	1	0	0	0	0	2	2	3	3	0	0	0	0	0	0	1	0	2	2	9.5	7.1	3	76.823	672	672;672;248	2
Q91V41;Q50HX3;A0A2R8VHW9	Q91V41;Q50HX3;A0A2R8VHW9	2;2;1	2;2;1	2;2;1	Ras-related protein Rab-14	Rab14	sp|Q91V41|RAB14_MOUSE Ras-related protein Rab-14 OS=Mus musculus OX=10090 GN=Rab14 PE=1 SV=3;tr|Q50HX3|Q50HX3_MOUSE RAB14 protein variant OS=Mus musculus OX=10090 GN=Rab14 PE=1 SV=1;tr|A0A2R8VHW9|A0A2R8VHW9_MOUSE Ras-related protein Rab-14 (Fragment) OS=Mu	3	2	2	2	0	1	0	0	0	0	1	2	0	0	0	1	0	0	0	0	1	2	0	0	0	1	0	0	0	0	1	2	0	0	20.9	20.9	20.9	23.897	215	215;197;83	5
Q56A07	Q56A07	1	1	1	Sodium channel subunit beta-2	Scn2b	sp|Q56A07|SCN2B_MOUSE Sodium channel subunit beta-2 OS=Mus musculus OX=10090 GN=Scn2b PE=1 SV=1	1	1	1	1	0	0	0	0	0	0	0	1	0	0	0	0	0	0	0	0	0	1	0	0	0	0	0	0	0	0	0	1	0	0	11.6	11.6	11.6	24.227	215	215	4
Q5DQR4	Q5DQR4	3	3	3	Syntaxin-binding protein 5-like	Stxbp5l	sp|Q5DQR4|STB5L_MOUSE Syntaxin-binding protein 5-like OS=Mus musculus OX=10090 GN=Stxbp5l PE=1 SV=1	1	3	3	3	0	0	1	0	0	0	0	2	0	1	0	0	1	0	0	0	0	2	0	1	0	0	1	0	0	0	0	2	0	1	3.5	3.5	3.5	131.84	1185	1185	1	4
Q5DTL9;Q8JZR6	Q5DTL9	6;1	6;1	5;0	Sodium-driven chloride bicarbonate exchanger	Slc4a10	sp|Q5DTL9|S4A10_MOUSE Sodium-driven chloride bicarbonate exchanger OS=Mus musculus OX=10090 GN=Slc4a10 PE=1 SV=2	2	6	6	5	0	0	2	0	0	0	2	3	0	1	0	0	2	0	0	0	2	3	0	1	0	0	2	0	0	0	1	3	0	1	7.6	7.6	6.8	125.82	1118	1118;1089	1	8
Q91WC3;Q8BYJ0;Q5F2C5;Q5ICG5;Q8R1X1;Q8C028;E9Q7Y2;B1ARG5;B0QZJ6	Q91WC3;Q8BYJ0;Q5F2C5;Q5ICG5;Q8R1X1;Q8C028;E9Q7Y2	3;3;3;3;3;2;2;1;1	3;3;3;3;3;2;2;1;1	3;3;3;3;3;2;2;1;1	Long-chain-fatty-acid--CoA ligase 6	Acsl6	sp|Q91WC3|ACSL6_MOUSE Long-chain-fatty-acid--CoA ligase 6 OS=Mus musculus OX=10090 GN=Acsl6 PE=1 SV=1;tr|Q8BYJ0|Q8BYJ0_MOUSE Long-chain-fatty-acid--CoA ligase 6 OS=Mus musculus OX=10090 GN=Acsl6 PE=1 SV=1;tr|Q5F2C5|Q5F2C5_MOUSE Long-chain-fatty-acid--CoA l	9	3	3	3	0	0	0	0	0	0	2	3	0	0	0	0	0	0	0	0	2	3	0	0	0	0	0	0	0	0	2	3	0	0	5.3	5.3	5.3	78.016	697	697;424;622;697;722;359;365;139;192	2
Q5PR73	Q5PR73	1	1	1	GTP-binding protein Di-Ras2	Diras2	sp|Q5PR73|DIRA2_MOUSE GTP-binding protein Di-Ras2 OS=Mus musculus OX=10090 GN=Diras2 PE=1 SV=1	1	1	1	1	0	0	0	0	0	0	0	1	0	0	0	0	0	0	0	0	0	1	0	0	0	0	0	0	0	0	0	1	0	0	5.5	5.5	5.5	22.498	199	199	5
Q5SQX6;F6QD74;G3UZI5	Q5SQX6;F6QD74	17;13;1	17;13;1	8;8;0	Cytoplasmic FMR1-interacting protein 2	Cyfip2	sp|Q5SQX6|CYFP2_MOUSE Cytoplasmic FMR1-interacting protein 2 OS=Mus musculus OX=10090 GN=Cyfip2 PE=1 SV=2;tr|F6QD74|F6QD74_MOUSE Cytoplasmic FMR1-interacting protein 2 (Fragment) OS=Mus musculus OX=10090 GN=Cyfip2 PE=1 SV=1	3	17	17	8	0	0	8	12	0	0	1	8	2	4	0	0	8	12	0	0	1	8	2	4	0	0	2	4	0	0	0	3	1	1	14.4	14.4	6.1	145.66	1253	1253;948;229	1.03	38
Q61545;Q5SUT0;Q5SUS9	Q61545;Q5SUT0;Q5SUS9	1;1;1	1;1;1	1;1;1	RNA-binding protein EWS	Ewsr1	sp|Q61545|EWS_MOUSE RNA-binding protein EWS OS=Mus musculus OX=10090 GN=Ewsr1 PE=1 SV=2;tr|Q5SUT0|Q5SUT0_MOUSE RNA-binding protein EWS OS=Mus musculus OX=10090 GN=Ewsr1 PE=1 SV=1;tr|Q5SUS9|Q5SUS9_MOUSE RNA-binding protein EWS OS=Mus musculus OX=10090 GN=Ew	3	1	1	1	0	0	0	0	0	0	1	0	1	1	0	0	0	0	0	0	1	0	1	1	0	0	0	0	0	0	1	0	1	1	2.1	2.1	2.1	68.461	655	655;618;661	2	1
Q68FD5;Q5SXR6;F6Z1R4	Q68FD5;Q5SXR6	32;32;3	32;32;3	32;32;3	Clathrin heavy chain 1;Clathrin heavy chain	Cltc	sp|Q68FD5|CLH1_MOUSE Clathrin heavy chain 1 OS=Mus musculus OX=10090 GN=Cltc PE=1 SV=3;tr|Q5SXR6|Q5SXR6_MOUSE Clathrin heavy chain OS=Mus musculus OX=10090 GN=Cltc PE=1 SV=1	3	32	32	32	13	17	11	7	6	6	15	25	17	20	13	17	11	7	6	6	15	25	17	20	13	17	11	7	6	6	15	25	17	20	24.1	24.1	24.1	191.55	1675	1675;1679;216	1.05	140
Q5U3K5	Q5U3K5	3	3	3	Rab-like protein 6	Rabl6	sp|Q5U3K5|RABL6_MOUSE Rab-like protein 6 OS=Mus musculus OX=10090 GN=Rabl6 PE=1 SV=2	1	3	3	3	2	0	0	0	0	0	0	1	1	3	2	0	0	0	0	0	0	1	1	3	2	0	0	0	0	0	0	1	1	3	5	5	5	79.83	725	725	1.22	7
Q60597;Z4YJV4;Q5SVY1;Q5SVY0	Q60597;Z4YJV4	21;20;1;1	21;20;1;1	17;16;1;1	2-oxoglutarate dehydrogenase, mitochondrial	Ogdh	sp|Q60597|ODO1_MOUSE 2-oxoglutarate dehydrogenase, mitochondrial OS=Mus musculus OX=10090 GN=Ogdh PE=1 SV=3;tr|Z4YJV4|Z4YJV4_MOUSE 2-oxoglutarate dehydrogenase, mitochondrial OS=Mus musculus OX=10090 GN=Ogdh PE=1 SV=1	4	21	21	17	6	3	17	2	8	13	5	7	10	9	6	3	17	2	8	13	5	7	10	9	3	2	13	2	5	9	3	4	8	7	25.9	25.9	21.9	116.45	1023	1023;1019;84;123	1.87	11
Q60625	Q60625	2	2	2	Intercellular adhesion molecule 5	Icam5	sp|Q60625|ICAM5_MOUSE Intercellular adhesion molecule 5 OS=Mus musculus OX=10090 GN=Icam5 PE=1 SV=2	1	2	2	2	1	0	1	0	0	0	2	2	0	2	1	0	1	0	0	0	2	2	0	2	1	0	1	0	0	0	2	2	0	2	2.6	2.6	2.6	96.944	917	917	1	8
Q60634;Q5SS83	Q60634;Q5SS83	21;20	21;20	21;20	Flotillin-2	Flot2	sp|Q60634|FLOT2_MOUSE Flotillin-2 OS=Mus musculus OX=10090 GN=Flot2 PE=1 SV=2;tr|Q5SS83|Q5SS83_MOUSE Flotillin OS=Mus musculus OX=10090 GN=Flot2 PE=1 SV=1	2	21	21	21	18	19	0	0	0	0	18	16	19	16	18	19	0	0	0	0	18	16	19	16	18	19	0	0	0	0	18	16	19	16	50.7	50.7	50.7	47.037	428	428;428	3.16	18
Q60771	Q60771	1	1	1	Claudin-11	Cldn11	sp|Q60771|CLD11_MOUSE Claudin-11 OS=Mus musculus OX=10090 GN=Cldn11 PE=1 SV=1	1	1	1	1	0	1	0	0	0	0	0	0	0	0	0	1	0	0	0	0	0	0	0	0	0	1	0	0	0	0	0	0	0	0	6.8	6.8	6.8	22.114	207	207	5
Q60865;F6YLI0	Q60865;F6YLI0	2;1	2;1	2;1	Caprin-1	Caprin1	sp|Q60865|CAPR1_MOUSE Caprin-1 OS=Mus musculus OX=10090 GN=Caprin1 PE=1 SV=2;tr|F6YLI0|F6YLI0_MOUSE Caprin-1 (Fragment) OS=Mus musculus OX=10090 GN=Caprin1 PE=1 SV=1	2	2	2	2	0	0	2	0	0	0	0	0	0	0	0	0	2	0	0	0	0	0	0	0	0	0	2	0	0	0	0	0	0	0	5.8	5.8	5.8	78.168	707	707;254	2
Q60902;A0A1D5RLS1	Q60902;A0A1D5RLS1	9;8	9;8	9;8	Epidermal growth factor receptor substrate 15-like 1	Eps15l1	sp|Q60902|EP15R_MOUSE Epidermal growth factor receptor substrate 15-like 1 OS=Mus musculus OX=10090 GN=Eps15l1 PE=1 SV=3;tr|A0A1D5RLS1|A0A1D5RLS1_MOUSE Epidermal growth factor receptor substrate 15-like 1 OS=Mus musculus OX=10090 GN=Eps15l1 PE=1 SV=1	2	9	9	9	0	0	0	9	0	0	0	0	0	0	0	0	0	9	0	0	0	0	0	0	0	0	0	9	0	0	0	0	0	0	13.1	13.1	13.1	99.307	907	907;599	1.5	9
Q60932;F2Z471	Q60932;F2Z471	9;6	9;6	9;6	Voltage-dependent anion-selective channel protein 1	Vdac1	sp|Q60932|VDAC1_MOUSE Voltage-dependent anion-selective channel protein 1 OS=Mus musculus OX=10090 GN=Vdac1 PE=1 SV=3;tr|F2Z471|F2Z471_MOUSE Voltage-dependent anion-selective channel protein 1 OS=Mus musculus OX=10090 GN=Vdac1 PE=1 SV=1	2	9	9	9	1	4	9	1	0	4	4	6	4	2	1	4	9	1	0	4	4	6	4	2	1	4	9	1	0	4	4	6	4	2	36.8	36.8	36.8	32.351	296	296;254	4.61
Q60967;Q6NZM8	Q60967;Q6NZM8	1;1	1;1	1;1	Bifunctional 3-phosphoadenosine 5-phosphosulfate synthase 1;Sulfate adenylyltransferase;Adenylyl-sulfate kinase	Papss1	sp|Q60967|PAPS1_MOUSE Bifunctional 3-phosphoadenosine 5-phosphosulfate synthase 1 OS=Mus musculus OX=10090 GN=Papss1 PE=1 SV=1;tr|Q6NZM8|Q6NZM8_MOUSE 3-phosphoadenosine-5-phosphosulfate synthase OS=Mus musculus OX=10090 GN=Papss1 PE=1 SV=1	2	1	1	1	0	0	1	0	0	0	0	0	0	0	0	0	1	0	0	0	0	0	0	0	0	0	1	0	0	0	0	0	0	0	1.8	1.8	1.8	70.793	624	624;603	4
Q61102	Q61102	6	6	6	ATP-binding cassette sub-family B member 7, mitochondrial	Abcb7	sp|Q61102|ABCB7_MOUSE ATP-binding cassette sub-family B member 7, mitochondrial OS=Mus musculus OX=10090 GN=Abcb7 PE=1 SV=3	1	6	6	6	0	0	0	0	0	0	0	1	6	5	0	0	0	0	0	0	0	1	6	5	0	0	0	0	0	0	0	1	6	5	8.4	8.4	8.4	82.58	752	752	1.67	6
Q61171;D3Z4A4	Q61171;D3Z4A4	4;3	4;3	4;3	Peroxiredoxin-2	Prdx2	sp|Q61171|PRDX2_MOUSE Peroxiredoxin-2 OS=Mus musculus OX=10090 GN=Prdx2 PE=1 SV=3;tr|D3Z4A4|D3Z4A4_MOUSE Peroxiredoxin-2 (Fragment) OS=Mus musculus OX=10090 GN=Prdx2 PE=1 SV=8	2	4	4	4	1	0	2	1	0	0	3	4	3	0	1	0	2	1	0	0	3	4	3	0	1	0	2	1	0	0	3	4	3	0	19.7	19.7	19.7	21.778	198	198;146	4.87
Q61495;Q7TSF1	Q61495;Q7TSF1	1;1	1;1	1;1	Desmoglein-1-alpha;Desmoglein-1-beta	Dsg1a;Dsg1b	sp|Q61495|DSG1A_MOUSE Desmoglein-1-alpha OS=Mus musculus OX=10090 GN=Dsg1a PE=2 SV=2;sp|Q7TSF1|DSG1B_MOUSE Desmoglein-1-beta OS=Mus musculus OX=10090 GN=Dsg1b PE=1 SV=1	2	1	1	1	0	0	0	1	0	0	0	0	0	0	0	0	0	1	0	0	0	0	0	0	0	0	0	1	0	0	0	0	0	0	1.2	1.2	1.2	114.6	1057	1057;1060	4
Q61598;P50396;A0A1Y7VLG4;A0A1Y7VL99	Q61598;P50396;A0A1Y7VLG4;A0A1Y7VL99	2;1;1;1	2;1;1;1	2;1;1;1	Rab GDP dissociation inhibitor beta;Rab GDP dissociation inhibitor alpha	Gdi2;Gdi1	sp|Q61598|GDIB_MOUSE Rab GDP dissociation inhibitor beta OS=Mus musculus OX=10090 GN=Gdi2 PE=1 SV=1;sp|P50396|GDIA_MOUSE Rab GDP dissociation inhibitor alpha OS=Mus musculus OX=10090 GN=Gdi1 PE=1 SV=3;tr|A0A1Y7VLG4|A0A1Y7VLG4_MOUSE Rab GDP dissociation inh	4	2	2	2	0	0	0	0	0	0	0	2	0	1	0	0	0	0	0	0	0	2	0	1	0	0	0	0	0	0	0	2	0	1	6.7	6.7	6.7	50.537	445	445;447;104;318	3
Q61627;Q61625	Q61627	14;1	14;1	14;1	Glutamate receptor ionotropic, delta-1	Grid1	sp|Q61627|GRID1_MOUSE Glutamate receptor ionotropic, delta-1 OS=Mus musculus OX=10090 GN=Grid1 PE=1 SV=2	2	14	14	14	0	0	0	1	0	0	14	13	2	5	0	0	0	1	0	0	14	13	2	5	0	0	0	1	0	0	14	13	2	5	18.8	18.8	18.8	112.21	1009	1009;1007	2	1
Q61656;Q8BTS0	Q61656;Q8BTS0	3;3	2;2	2;2	Probable ATP-dependent RNA helicase DDX5	Ddx5	sp|Q61656|DDX5_MOUSE Probable ATP-dependent RNA helicase DDX5 OS=Mus musculus OX=10090 GN=Ddx5 PE=1 SV=2;tr|Q8BTS0|Q8BTS0_MOUSE DEAD box protein 5 OS=Mus musculus OX=10090 GN=Ddx5 PE=1 SV=1	2	3	2	2	1	1	0	0	0	0	0	0	1	1	0	1	0	0	0	0	0	0	1	1	0	1	0	0	0	0	0	0	1	1	4.7	2.9	2.9	69.289	614	614;615	2
Q61838;D3YUI3	Q61838	7;1	7;1	7;1	Alpha-2-macroglobulin;Alpha-2-macroglobulin 165 kDa subunit;Alpha-2-macroglobulin 35 kDa subunit	A2m	sp|Q61838|PZP_MOUSE Pregnancy zone protein OS=Mus musculus OX=10090 GN=Pzp PE=1 SV=3	2	7	7	7	0	1	0	0	0	0	7	2	1	0	0	1	0	0	0	0	7	2	1	0	0	1	0	0	0	0	7	2	1	0	6	6	6	165.85	1495	1495;233	2.83	4
Q62277;F6VR28	Q62277	3;1	3;1	3;1	Synaptophysin	Syp	sp|Q62277|SYPH_MOUSE Synaptophysin OS=Mus musculus OX=10090 GN=Syp PE=1 SV=2	2	3	3	3	1	1	1	2	0	1	1	2	0	1	1	1	1	2	0	1	1	2	0	1	1	1	1	2	0	1	1	2	0	1	10.5	10.5	10.5	34.024	314	314;165	4
Q63810	Q63810	8	8	8	Calcineurin subunit B type 1	Ppp3r1	sp|Q63810|CANB1_MOUSE Calcineurin subunit B type 1 OS=Mus musculus OX=10090 GN=Ppp3r1 PE=1 SV=3	1	8	8	8	0	0	0	0	0	0	7	8	1	0	0	0	0	0	0	0	7	8	1	0	0	0	0	0	0	0	7	8	1	0	55.9	55.9	55.9	19.3	170	170	5
Q64332	Q64332	8	7	7	Synapsin-2	Syn2	sp|Q64332|SYN2_MOUSE Synapsin-2 OS=Mus musculus OX=10090 GN=Syn2 PE=1 SV=2	1	8	7	7	3	3	1	0	0	1	2	8	4	6	3	3	1	0	0	1	2	7	4	6	3	3	1	0	0	1	2	7	4	6	24.6	21.8	21.8	63.372	586	586	2.86	2
Q64516;B1ASZ3;Q9WU65	Q64516;B1ASZ3	6;5;1	6;5;1	6;5;1	Glycerol kinase	Gk;Gyk	sp|Q64516|GLPK_MOUSE Glycerol kinase OS=Mus musculus OX=10090 GN=Gk PE=1 SV=2;tr|B1ASZ3|B1ASZ3_MOUSE Glycerol kinase OS=Mus musculus OX=10090 GN=Gk PE=1 SV=1	3	6	6	6	0	1	6	0	0	0	0	0	0	1	0	1	6	0	0	0	0	0	0	1	0	1	6	0	0	0	0	0	0	1	15.2	15.2	15.2	61.227	559	559;552;554	3.25
Q68FG2	Q68FG2	3	3	3		Sptbn2	tr|Q68FG2|Q68FG2_MOUSE Spectrin beta chain OS=Mus musculus OX=10090 GN=Sptbn2 PE=1 SV=1	1	3	3	3	0	0	1	0	0	0	0	1	1	1	0	0	1	0	0	0	0	1	1	1	0	0	1	0	0	0	0	1	1	1	2	2	2	270.92	2388	2388	1	4
Q69ZK9;F6VE93;B0F2B4;Q99K10;E9QK34	Q69ZK9	5;2;2;1;1	5;2;2;1;1	4;1;1;1;1	Neuroligin-2	Nlgn2	sp|Q69ZK9|NLGN2_MOUSE Neuroligin-2 OS=Mus musculus OX=10090 GN=Nlgn2 PE=1 SV=2	5	5	5	4	0	0	1	0	0	0	4	3	3	4	0	0	1	0	0	0	4	3	3	4	0	0	1	0	0	0	3	2	2	3	8.6	8.6	7.1	90.988	836	836;262;945;843;814	1.88	2
Q69ZN6	Q69ZN6	1	1	1	N-acetylglucosamine-1-phosphotransferase subunits alpha/beta;N-acetylglucosamine-1-phosphotransferase subunit alpha;N-acetylglucosamine-1-phosphotransferase subunit beta	Gnptab	sp|Q69ZN6|GNPTA_MOUSE N-acetylglucosamine-1-phosphotransferase subunits alpha/beta OS=Mus musculus OX=10090 GN=Gnptab PE=2 SV=2	1	1	1	1	0	0	0	1	0	0	0	0	0	0	0	0	0	1	0	0	0	0	0	0	0	0	0	1	0	0	0	0	0	0	1.1	1.1	1.1	140.98	1235	1235	1	1
Q6NZL0;A0A1L1SUV1;Q3UHU5;B8JJI7;H3BL83;A2ACV6;E1U8D0	Q6NZL0	21;3;2;2;2;1;1	21;3;2;2;2;1;1	21;3;2;2;2;1;1	Protein SOGA3	Soga3	sp|Q6NZL0|SOGA3_MOUSE Protein SOGA3 OS=Mus musculus OX=10090 GN=Soga3 PE=1 SV=2	7	21	21	21	0	0	0	21	0	0	1	0	0	0	0	0	0	21	0	0	1	0	0	0	0	0	0	21	0	0	1	0	0	0	21	21	21	103.48	945	945;199;1945;1496;1590;1654;1418	2	10
Q6P1F6;Q9CWU3;Q8BG02;Q6ZWR4;A0A494B8Z0;A0A668KLA9	Q6P1F6;Q9CWU3;Q8BG02;Q6ZWR4;A0A494B8Z0;A0A668KLA9	2;2;1;1;1;1	2;2;1;1;1;1	2;2;1;1;1;1	Serine/threonine-protein phosphatase 2A 55 kDa regulatory subunit B alpha isoform;Serine/threonine-protein phosphatase 2A 55 kDa regulatory subunit B;Serine/threonine-protein phosphatase 2A 55 kDa regulatory subunit B gamma isoform;Serine/threonine-protein phosphatase 2A 55 kDa regulatory subunit B beta isoform	Ppp2r2a;Ppp2r2c;Ppp2r2b	sp|Q6P1F6|2ABA_MOUSE Serine/threonine-protein phosphatase 2A 55 kDa regulatory subunit B alpha isoform OS=Mus musculus OX=10090 GN=Ppp2r2a PE=1 SV=1;tr|Q9CWU3|Q9CWU3_MOUSE Serine/threonine-protein phosphatase 2A 55 kDa regulatory subunit B OS=Mus musculus	6	2	2	2	0	0	0	0	0	0	0	2	0	2	0	0	0	0	0	0	0	2	0	2	0	0	0	0	0	0	0	2	0	2	4.7	4.7	4.7	51.691	447	447;367;447;443;163;501	3
Q6P1J1;P97427;A0A0J9YTX5;Q71H75;A0A0J9YUZ1;O35098;Q3TMU8;A0A0R4J1N0	Q6P1J1;P97427	31;27;6;6;5;1;1;1	29;25;6;5;5;1;1;1	28;24;6;5;5;1;1;1	Dihydropyrimidinase-related protein 1	Crmp1	tr|Q6P1J1|Q6P1J1_MOUSE Crmp1 protein OS=Mus musculus OX=10090 GN=Crmp1 PE=1 SV=1;sp|P97427|DPYL1_MOUSE Dihydropyrimidinase-related protein 1 OS=Mus musculus OX=10090 GN=Crmp1 PE=1 SV=1	8	31	29	28	1	2	31	3	5	2	4	3	2	3	0	0	29	1	3	1	2	1	0	1	0	0	28	1	3	1	2	0	0	1	60.1	55.8	54.8	74.22	686	686;572;157;191;143;572;572;593	2.46	15
Q6P9Q4	Q6P9Q4	1	1	1	FH1/FH2 domain-containing protein 1	Fhod1	sp|Q6P9Q4|FHOD1_MOUSE FH1/FH2 domain-containing protein 1 OS=Mus musculus OX=10090 GN=Fhod1 PE=1 SV=3	1	1	1	1	0	0	0	1	1	0	0	0	0	0	0	0	0	1	1	0	0	0	0	0	0	0	0	1	1	0	0	0	0	0	0.8	0.8	0.8	129.6	1197	1197	5
Q6PB66	Q6PB66	2	2	2	Leucine-rich PPR motif-containing protein, mitochondrial	Lrpprc	sp|Q6PB66|LPPRC_MOUSE Leucine-rich PPR motif-containing protein, mitochondrial OS=Mus musculus OX=10090 GN=Lrpprc PE=1 SV=2	1	2	2	2	0	0	0	0	0	0	0	2	0	0	0	0	0	0	0	0	0	2	0	0	0	0	0	0	0	0	0	2	0	0	1.4	1.4	1.4	156.61	1392	1392	1	2
Q6PGB6	Q6PGB6	16	16	16	N-alpha-acetyltransferase 50	Naa50	sp|Q6PGB6|NAA50_MOUSE N-alpha-acetyltransferase 50 OS=Mus musculus OX=10090 GN=Naa50 PE=1 SV=1	1	16	16	16	11	12	2	9	10	2	10	11	10	9	11	12	2	9	10	2	10	11	10	9	11	12	2	9	10	2	10	11	10	9	60.9	60.9	60.9	19.414	169	169	5
Q6PHU5	Q6PHU5	3	3	3	Sortilin	Sort1	sp|Q6PHU5|SORT_MOUSE Sortilin OS=Mus musculus OX=10090 GN=Sort1 PE=1 SV=1	1	3	3	3	0	0	0	0	0	0	1	3	0	1	0	0	0	0	0	0	1	3	0	1	0	0	0	0	0	0	1	3	0	1	5.6	5.6	5.6	91.199	825	825	2
Q6TDP3	Q6TDP3	1	1	1	Kelch-like protein 17	Klhl17	sp|Q6TDP3|KLH17_MOUSE Kelch-like protein 17 OS=Mus musculus OX=10090 GN=Klhl17 PE=1 SV=1	1	1	1	1	1	1	0	0	0	0	1	0	1	0	1	1	0	0	0	0	1	0	1	0	1	1	0	0	0	0	1	0	1	0	1.6	1.6	1.6	69.731	640	640	3.33
Q6ZPE2;E9PXF8;F7AWK3;D6RG52;E9Q0D4	Q6ZPE2	8;1;1;1;1	8;1;1;1;1	8;1;1;1;1	Myotubularin-related protein 5	Sbf1	sp|Q6ZPE2|MTMR5_MOUSE Myotubularin-related protein 5 OS=Mus musculus OX=10090 GN=Sbf1 PE=1 SV=2	5	8	8	8	0	0	7	0	0	0	0	1	0	0	0	0	7	0	0	0	0	1	0	0	0	0	7	0	0	0	0	1	0	0	6.2	6.2	6.2	208.69	1867	1867;1872;257;403;1826	1	8
Q6ZQ38	Q6ZQ38	3	3	3	Cullin-associated NEDD8-dissociated protein 1	Cand1	sp|Q6ZQ38|CAND1_MOUSE Cullin-associated NEDD8-dissociated protein 1 OS=Mus musculus OX=10090 GN=Cand1 PE=1 SV=2	1	3	3	3	0	0	0	0	0	0	0	3	0	0	0	0	0	0	0	0	0	3	0	0	0	0	0	0	0	0	0	3	0	0	3.2	3.2	3.2	136.33	1230	1230	1	3
Q76MZ3;Q7TNP2;H3BK50;G3UWL2;H3BIV7;H3BLQ0;H3BLE7;Q3TTF6;H3BKU1;G3UWS4	Q76MZ3	3;1;1;1;1;1;1;1;1;1	3;1;1;1;1;1;1;1;1;1	3;1;1;1;1;1;1;1;1;1	Serine/threonine-protein phosphatase 2A 65 kDa regulatory subunit A alpha isoform	Ppp2r1a	sp|Q76MZ3|2AAA_MOUSE Serine/threonine-protein phosphatase 2A 65 kDa regulatory subunit A alpha isoform OS=Mus musculus OX=10090 GN=Ppp2r1a PE=1 SV=3	10	3	3	3	0	0	0	2	0	0	0	2	0	2	0	0	0	2	0	0	0	2	0	2	0	0	0	2	0	0	0	2	0	2	7.8	7.8	7.8	65.322	589	589;601;93;143;474;556;603;658;667;694	2.86
Q792Z1	Q792Z1	2	2	2		Try10	tr|Q792Z1|Q792Z1_MOUSE Trypsin 10 OS=Mus musculus OX=10090 GN=Try10 PE=1 SV=1	1	2	2	2	1	2	0	2	2	1	2	2	1	2	1	2	0	2	2	1	2	2	1	2	1	2	0	2	2	1	2	2	1	2	8.1	8.1	8.1	26.221	246	246	3.14	12
Q7TMB8;A0A0U1RQ05;A0A0R4J119	Q7TMB8;A0A0U1RQ05;A0A0R4J119	10;8;8	1;1;1	1;1;1	Cytoplasmic FMR1-interacting protein 1	Cyfip1	sp|Q7TMB8|CYFP1_MOUSE Cytoplasmic FMR1-interacting protein 1 OS=Mus musculus OX=10090 GN=Cyfip1 PE=1 SV=1;tr|A0A0U1RQ05|A0A0U1RQ05_MOUSE Cytoplasmic FMR1-interacting protein 1 (Fragment) OS=Mus musculus OX=10090 GN=Cyfip1 PE=1 SV=1;tr|A0A0R4J119|A0A0R4J119	3	10	1	1	0	0	6	9	0	0	1	6	1	3	0	0	0	1	0	0	0	1	0	0	0	0	0	1	0	0	0	1	0	0	9.2	0.9	0.9	145.24	1253	1253;969;1251	1	2
Q7TMM9;Q9CWF2	Q7TMM9;Q9CWF2	18;17	5;4	3;2	Tubulin beta-2A chain;Tubulin beta-2B chain	Tubb2a;Tubb2b	sp|Q7TMM9|TBB2A_MOUSE Tubulin beta-2A chain OS=Mus musculus OX=10090 GN=Tubb2a PE=1 SV=1;sp|Q9CWF2|TBB2B_MOUSE Tubulin beta-2B chain OS=Mus musculus OX=10090 GN=Tubb2b PE=1 SV=1	2	18	5	3	13	15	13	11	2	2	15	15	15	16	5	5	3	3	0	0	5	5	5	5	3	3	2	2	0	0	3	3	3	3	50.6	14.2	8.1	49.906	445	445;445	3.07	2
Q7TMN8	Q7TMN8	1	1	1		Zfp420	tr|Q7TMN8|Q7TMN8_MOUSE Zfp420 protein OS=Mus musculus OX=10090 GN=Zfp420 PE=1 SV=1	1	1	1	1	1	0	0	0	0	0	1	0	1	0	1	0	0	0	0	0	1	0	1	0	1	0	0	0	0	0	1	0	1	0	2.6	2.6	2.6	67.043	578	578	3.25	1
Q7TNB5	Q7TNB5	37	30	2		Gria1	tr|Q7TNB5|Q7TNB5_MOUSE Glutamate receptor OS=Mus musculus OX=10090 GN=Gria1 PE=1 SV=1	1	37	30	2	0	3	30	19	4	1	37	36	31	30	0	2	24	16	3	1	30	29	24	24	0	1	1	1	0	0	2	2	1	2	44.5	36.4	1.5	101.59	907	907	2.06	128
Q7TSJ2;D3Z6W1;A0A140LIT9	Q7TSJ2;D3Z6W1;A0A140LIT9	3;2;2	3;2;2	3;2;2	Microtubule-associated protein 6	Map6	sp|Q7TSJ2|MAP6_MOUSE Microtubule-associated protein 6 OS=Mus musculus OX=10090 GN=Map6 PE=1 SV=2;tr|D3Z6W1|D3Z6W1_MOUSE Microtubule-associated protein 6 OS=Mus musculus OX=10090 GN=Map6 PE=1 SV=1;tr|A0A140LIT9|A0A140LIT9_MOUSE Microtubule-associated protei	3	3	3	3	0	1	0	0	0	0	0	1	2	3	0	1	0	0	0	0	0	1	2	3	0	1	0	0	0	0	0	1	2	3	5.4	5.4	5.4	96.449	906	906;509;703	1	7
Q7TT15;E9Q714	Q7TT15;E9Q714	3;2	3;2	3;2	Putative polypeptide N-acetylgalactosaminyltransferase-like protein 3	Wbscr17	sp|Q7TT15|GLT17_MOUSE Polypeptide N-acetylgalactosaminyltransferase 17 OS=Mus musculus OX=10090 GN=Galnt17 PE=1 SV=1;tr|E9Q714|E9Q714_MOUSE Polypeptide N-acetylgalactosaminyltransferase 17 OS=Mus musculus OX=10090 GN=Galnt17 PE=1 SV=1	2	3	3	3	0	0	0	0	0	0	1	0	2	3	0	0	0	0	0	0	1	0	2	3	0	0	0	0	0	0	1	0	2	3	5.2	5.2	5.2	67.69	598	598;371	2
Q80SW1;Q68FL4;H3BKT5;F8WI65;F8WGT1	Q80SW1;Q68FL4;H3BKT5;F8WI65;F8WGT1	3;2;2;2;2	3;2;2;2;2	3;2;2;2;2	Putative adenosylhomocysteinase 2;Putative adenosylhomocysteinase 3;Adenosylhomocysteinase	Ahcyl1;Ahcyl2	sp|Q80SW1|SAHH2_MOUSE S-adenosylhomocysteine hydrolase-like protein 1 OS=Mus musculus OX=10090 GN=Ahcyl1 PE=1 SV=1;sp|Q68FL4|SAHH3_MOUSE Putative adenosylhomocysteinase 3 OS=Mus musculus OX=10090 GN=Ahcyl2 PE=1 SV=1;tr|H3BKT5|H3BKT5_MOUSE Putative adenosyl	5	3	3	3	0	0	2	0	0	0	0	1	0	0	0	0	2	0	0	0	0	1	0	0	0	0	2	0	0	0	0	1	0	0	5.5	5.5	5.5	58.951	530	530;613;404;508;612	2.33
Q80T41	Q80T41	3	3	3	Gamma-aminobutyric acid type B receptor subunit 2	Gabbr2	sp|Q80T41|GABR2_MOUSE Gamma-aminobutyric acid type B receptor subunit 2 OS=Mus musculus OX=10090 GN=Gabbr2 PE=1 SV=2	1	3	3	3	0	0	2	3	0	0	0	0	0	0	0	0	2	3	0	0	0	0	0	0	0	0	2	3	0	0	0	0	0	0	4	4	4	105.67	940	940	1	5
Q80VD1	Q80VD1	2	2	2	Protein FAM98B	Fam98b	sp|Q80VD1|FA98B_MOUSE Protein FAM98B OS=Mus musculus OX=10090 GN=Fam98b PE=1 SV=1	1	2	2	2	1	1	0	0	0	0	1	0	2	1	1	1	0	0	0	0	1	0	2	1	1	1	0	0	0	0	1	0	2	1	5.4	5.4	5.4	45.349	429	429	3.29
Q80X80;Q8CAA2	Q80X80;Q8CAA2	1;1	1;1	1;1	C2 domain-containing protein 2-like	C2cd2l	sp|Q80X80|C2C2L_MOUSE Phospholipid transfer protein C2CD2L OS=Mus musculus OX=10090 GN=C2cd2l PE=1 SV=3;tr|Q8CAA2|Q8CAA2_MOUSE Phospholipid transfer protein C2CD2L OS=Mus musculus OX=10090 GN=C2cd2l PE=1 SV=1	2	1	1	1	0	0	0	0	0	0	1	1	1	1	0	0	0	0	0	0	1	1	1	1	0	0	0	0	0	0	1	1	1	1	1.4	1.4	1.4	76.328	706	706;654	2
Q80XN0	Q80XN0	1	1	1	D-beta-hydroxybutyrate dehydrogenase, mitochondrial	Bdh1	sp|Q80XN0|BDH_MOUSE D-beta-hydroxybutyrate dehydrogenase, mitochondrial OS=Mus musculus OX=10090 GN=Bdh1 PE=1 SV=2	1	1	1	1	0	0	0	0	0	0	1	1	0	0	0	0	0	0	0	0	1	1	0	0	0	0	0	0	0	0	1	1	0	0	5.8	5.8	5.8	38.299	343	343	5
Q80Y86	Q80Y86	1	1	1	Mitogen-activated protein kinase 15	Mapk15	sp|Q80Y86|MK15_MOUSE Mitogen-activated protein kinase 15 OS=Mus musculus OX=10090 GN=Mapk15 PE=1 SV=1	1	1	1	1	0	0	1	1	0	0	0	0	0	0	0	0	1	1	0	0	0	0	0	0	0	0	1	1	0	0	0	0	0	0	1.5	1.5	1.5	60.678	549	549	4
Q80YQ2	Q80YQ2	1	1	1	Mediator of RNA polymerase II transcription subunit 23	Med23	sp|Q80YQ2|MED23_MOUSE Mediator of RNA polymerase II transcription subunit 23 OS=Mus musculus OX=10090 GN=Med23 PE=1 SV=2	1	1	1	1	0	0	0	0	0	1	0	0	0	0	0	0	0	0	0	1	0	0	0	0	0	0	0	0	0	1	0	0	0	0	1	1	1	156.09	1367	1367	5
Q80ZJ1	Q80ZJ1	2	1	1	Ras-related protein Rap-2a	Rap2a	sp|Q80ZJ1|RAP2A_MOUSE Ras-related protein Rap-2a OS=Mus musculus OX=10090 GN=Rap2a PE=1 SV=2	1	2	1	1	0	0	0	0	0	0	1	2	1	0	0	0	0	0	0	0	0	1	0	0	0	0	0	0	0	0	0	1	0	0	12	6.6	6.6	20.642	183	183	5
Q8BFR5;A0A0U1RPC4;A0A0U1RNQ6	Q8BFR5	3;1;1	3;1;1	3;1;1	Elongation factor Tu, mitochondrial	Tufm	sp|Q8BFR5|EFTU_MOUSE Elongation factor Tu, mitochondrial OS=Mus musculus OX=10090 GN=Tufm PE=1 SV=1	3	3	3	3	0	1	0	0	0	0	2	1	1	0	0	1	0	0	0	0	2	1	1	0	0	1	0	0	0	0	2	1	1	0	10.4	10.4	10.4	49.508	452	452;116;118	3.6
Q8BFZ3	Q8BFZ3	6	1	1	Beta-actin-like protein 2	Actbl2	sp|Q8BFZ3|ACTBL_MOUSE Beta-actin-like protein 2 OS=Mus musculus OX=10090 GN=Actbl2 PE=1 SV=1	1	6	1	1	2	4	4	6	2	2	4	5	3	5	0	0	1	1	1	0	0	1	0	1	0	0	1	1	1	0	0	1	0	1	23.9	4.8	4.8	42.004	376	376	2.57	3
Q8BFZ6	Q8BFZ6	1	1	1	Isopentenyl-diphosphate delta-isomerase 2	Idi2	sp|Q8BFZ6|IDI2_MOUSE Isopentenyl-diphosphate delta-isomerase 2 OS=Mus musculus OX=10090 GN=Idi2 PE=2 SV=1	1	1	1	1	0	0	0	1	1	0	0	0	0	0	0	0	0	1	1	0	0	0	0	0	0	0	0	1	1	0	0	0	0	0	4.4	4.4	4.4	26.664	227	227	5
Q8BFZ9;A0A1B0GT70;Q91X78;A0A1B0GQZ0;A0A1B0GSD8	Q8BFZ9;A0A1B0GT70	3;2;1;1;1	3;2;1;1;1	3;2;1;1;1	Erlin-2	Erlin2	sp|Q8BFZ9|ERLN2_MOUSE Erlin-2 OS=Mus musculus OX=10090 GN=Erlin2 PE=1 SV=1;tr|A0A1B0GT70|A0A1B0GT70_MOUSE Erlin-2 (Fragment) OS=Mus musculus OX=10090 GN=Erlin2 PE=1 SV=1	5	3	3	3	0	0	0	0	0	0	1	3	0	0	0	0	0	0	0	0	1	3	0	0	0	0	0	0	0	0	1	3	0	0	12.9	12.9	12.9	37.872	340	340;251;348;185;220	4
Q8BGN3;A0A1B0GS66;D3YU63	Q8BGN3;A0A1B0GS66;D3YU63	2;1;1	2;1;1	2;1;1	Ectonucleotide pyrophosphatase/phosphodiesterase family member 6	Enpp6	sp|Q8BGN3|ENPP6_MOUSE Glycerophosphocholine cholinephosphodiesterase ENPP6 OS=Mus musculus OX=10090 GN=Enpp6 PE=1 SV=1;tr|A0A1B0GS66|A0A1B0GS66_MOUSE Choline-specific glycerophosphodiester phosphodiesterase OS=Mus musculus OX=10090 GN=Enpp6 PE=1 SV=1;tr|D3	3	2	2	2	0	0	0	0	0	0	0	2	0	0	0	0	0	0	0	0	0	2	0	0	0	0	0	0	0	0	0	2	0	0	4.8	4.8	4.8	50.618	440	440;232;390	3
Q8BH59;V9GXX9	Q8BH59	18;3	18;3	15;3	Calcium-binding mitochondrial carrier protein Aralar1	Slc25a12	sp|Q8BH59|CMC1_MOUSE Calcium-binding mitochondrial carrier protein Aralar1 OS=Mus musculus OX=10090 GN=Slc25a12 PE=1 SV=1	2	18	18	15	2	0	3	7	5	1	14	17	6	7	2	0	3	7	5	1	14	17	6	7	2	0	3	5	3	1	13	14	5	6	37.5	37.5	33.2	74.569	677	677;87	1.97	2
Q8BH66;A0A1Y7VLD6	Q8BH66	3;1	3;1	3;1	Atlastin-1	Atl1	sp|Q8BH66|ATLA1_MOUSE Atlastin-1 OS=Mus musculus OX=10090 GN=Atl1 PE=1 SV=1	2	3	3	3	0	0	0	0	0	0	1	3	0	1	0	0	0	0	0	0	1	3	0	1	0	0	0	0	0	0	1	3	0	1	5.2	5.2	5.2	63.377	558	558;133	3
Q9QY76;Q8BH80	Q9QY76;Q8BH80	2;2	1;1	1;1	Vesicle-associated membrane protein-associated protein B	Vapb	sp|Q9QY76|VAPB_MOUSE Vesicle-associated membrane protein-associated protein B OS=Mus musculus OX=10090 GN=Vapb PE=1 SV=3;tr|Q8BH80|Q8BH80_MOUSE Vesicle-associated membrane protein, associated protein B and C OS=Mus musculus OX=10090 GN=Vapb PE=1 SV=1	2	2	1	1	0	0	0	0	0	0	0	1	2	0	0	0	0	0	0	0	0	1	1	0	0	0	0	0	0	0	0	1	1	0	10.7	5.8	5.8	26.946	243	243;243	5
Q8BHH2	Q8BHH2	1	1	1	Ras-related protein Rab-9B	Rab9b	sp|Q8BHH2|RAB9B_MOUSE Ras-related protein Rab-9B OS=Mus musculus OX=10090 GN=Rab9b PE=1 SV=1	1	1	1	1	0	0	0	0	0	0	1	1	0	0	0	0	0	0	0	0	1	1	0	0	0	0	0	0	0	0	1	1	0	0	8	8	8	22.704	201	201	5
Q8BK72;A0A338P7I7	Q8BK72;A0A338P7I7	3;2	3;2	3;2	28S ribosomal protein S27, mitochondrial	Mrps27	sp|Q8BK72|RT27_MOUSE 28S ribosomal protein S27, mitochondrial OS=Mus musculus OX=10090 GN=Mrps27 PE=1 SV=2;tr|A0A338P7I7|A0A338P7I7_MOUSE 28S ribosomal protein S27, mitochondrial (Fragment) OS=Mus musculus OX=10090 GN=Mrps27 PE=1 SV=1	2	3	3	3	0	0	0	0	0	0	0	1	3	1	0	0	0	0	0	0	0	1	3	1	0	0	0	0	0	0	0	1	3	1	8.2	8.2	8.2	47.778	415	415;289	3.83
Q8BKZ9;A2AWH8	Q8BKZ9;A2AWH8	2;1	2;1	2;1	Pyruvate dehydrogenase protein X component, mitochondrial	Pdhx	sp|Q8BKZ9|ODPX_MOUSE Pyruvate dehydrogenase protein X component, mitochondrial OS=Mus musculus OX=10090 GN=Pdhx PE=1 SV=1;tr|A2AWH8|A2AWH8_MOUSE Pyruvate dehydrogenase protein X component, mitochondrial OS=Mus musculus OX=10090 GN=Pdhx PE=1 SV=1	2	2	2	2	1	0	0	0	0	0	1	1	0	0	1	0	0	0	0	0	1	1	0	0	1	0	0	0	0	0	1	1	0	0	5.2	5.2	5.2	53.998	501	501;220	3
Q8BMF4	Q8BMF4	7	7	7	Dihydrolipoyllysine-residue acetyltransferase component of pyruvate dehydrogenase complex, mitochondrial	Dlat	sp|Q8BMF4|ODP2_MOUSE Dihydrolipoyllysine-residue acetyltransferase component of pyruvate dehydrogenase complex, mitochondrial OS=Mus musculus OX=10090 GN=Dlat PE=1 SV=2	1	7	7	7	1	3	5	3	3	3	3	5	4	4	1	3	5	3	3	3	3	5	4	4	1	3	5	3	3	3	3	5	4	4	14.3	14.3	14.3	67.941	642	642	2.1
Q8BND5	Q8BND5	1	1	1	Sulfhydryl oxidase 1	Qsox1	sp|Q8BND5|QSOX1_MOUSE Sulfhydryl oxidase 1 OS=Mus musculus OX=10090 GN=Qsox1 PE=1 SV=1	1	1	1	1	1	0	0	1	1	0	1	0	1	1	1	0	0	1	1	0	1	0	1	1	1	0	0	1	1	0	1	0	1	1	2	2	2	82.784	748	748	3	4
Q8BQ46	Q8BQ46	3	1	1		Taf15	tr|Q8BQ46|Q8BQ46_MOUSE TAF15 RNA polymerase II, TATA box binding protein (TBP)-associated factor OS=Mus musculus OX=10090 GN=Taf15 PE=1 SV=1	1	3	1	1	1	2	0	0	0	0	0	3	2	2	0	0	0	0	0	0	0	1	0	0	0	0	0	0	0	0	0	1	0	0	8.8	4.7	4.7	58.6	557	557	2
Q8BUM3	Q8BUM3	1	1	1	Tyrosine-protein phosphatase non-receptor type 7	Ptpn7	sp|Q8BUM3|PTN7_MOUSE Tyrosine-protein phosphatase non-receptor type 7 OS=Mus musculus OX=10090 GN=Ptpn7 PE=1 SV=1	1	1	1	1	0	1	0	0	0	0	0	0	0	0	0	1	0	0	0	0	0	0	0	0	0	1	0	0	0	0	0	0	0	0	2.2	2.2	2.2	40.351	359	359	2
Q8BYI9;A0A0A6YWD9	Q8BYI9	8;1	8;1	8;1	Tenascin-R	Tnr	sp|Q8BYI9|TENR_MOUSE Tenascin-R OS=Mus musculus OX=10090 GN=Tnr PE=1 SV=2	2	8	8	8	3	1	1	2	1	1	2	3	1	3	3	1	1	2	1	1	2	3	1	3	3	1	1	2	1	1	2	3	1	3	8	8	8	149.59	1358	1358;181	1	18
Q8C863;Q8BZZ3	Q8C863;Q8BZZ3	1;1	1;1	1;1	E3 ubiquitin-protein ligase Itchy;NEDD4-like E3 ubiquitin-protein ligase WWP1	Itch;Wwp1	sp|Q8C863|ITCH_MOUSE E3 ubiquitin-protein ligase Itchy OS=Mus musculus OX=10090 GN=Itch PE=1 SV=2;sp|Q8BZZ3|WWP1_MOUSE NEDD4-like E3 ubiquitin-protein ligase WWP1 OS=Mus musculus OX=10090 GN=Wwp1 PE=1 SV=2	2	1	1	1	0	0	0	0	0	0	0	1	0	0	0	0	0	0	0	0	0	1	0	0	0	0	0	0	0	0	0	1	0	0	1.4	1.4	1.4	98.992	864	864;918	2
Q8C163;A0A1L1SS05	Q8C163	4;1	4;1	4;1	Nuclease EXOG, mitochondrial	Exog	sp|Q8C163|EXOG_MOUSE Nuclease EXOG, mitochondrial OS=Mus musculus OX=10090 GN=Exog PE=1 SV=1	2	4	4	4	0	0	0	4	0	0	0	0	0	0	0	0	0	4	0	0	0	0	0	0	0	0	0	4	0	0	0	0	0	0	14.7	14.7	14.7	41.383	368	368;114	4
Q8C419	Q8C419	2	2	2	Probable G-protein coupled receptor 158	Gpr158	sp|Q8C419|GP158_MOUSE Probable G-protein coupled receptor 158 OS=Mus musculus OX=10090 GN=Gpr158 PE=1 SV=2	1	2	2	2	0	0	0	0	0	0	1	1	1	2	0	0	0	0	0	0	1	1	1	2	0	0	0	0	0	0	1	1	1	2	1.5	1.5	1.5	134.42	1200	1200	1	5
S4R1L3;Q8C5H1;S4R1Z9;Q8CA69;S4R1Z4	S4R1L3;Q8C5H1	3;3;1;1;1	3;3;1;1;1	3;3;1;1;1	Anoctamin;Anoctamin-4	Ano4	tr|S4R1L3|S4R1L3_MOUSE Anoctamin OS=Mus musculus OX=10090 GN=Ano4 PE=3 SV=1;sp|Q8C5H1|ANO4_MOUSE Anoctamin-4 OS=Mus musculus OX=10090 GN=Ano4 PE=1 SV=2	5	3	3	3	0	0	0	0	0	0	3	2	0	0	0	0	0	0	0	0	3	2	0	0	0	0	0	0	0	0	3	2	0	0	3.3	3.3	3.3	107.68	920	920;955;155;190;356	1.62	3
Q9WUA3;Q8C605;F6YL81	Q9WUA3;Q8C605;F6YL81	2;2;1	1;1;1	1;1;1	ATP-dependent 6-phosphofructokinase, platelet type;ATP-dependent 6-phosphofructokinase	Pfkp	sp|Q9WUA3|PFKAP_MOUSE ATP-dependent 6-phosphofructokinase, platelet type OS=Mus musculus OX=10090 GN=Pfkp PE=1 SV=1;tr|Q8C605|Q8C605_MOUSE ATP-dependent 6-phosphofructokinase OS=Mus musculus OX=10090 GN=Pfkp PE=1 SV=1;tr|F6YL81|F6YL81_MOUSE ATP-dependent 6	3	2	1	1	0	0	1	0	0	0	1	1	1	2	0	0	1	0	0	0	1	0	1	1	0	0	1	0	0	0	1	0	1	1	2.6	1.4	1.4	85.454	784	784;784;183	2
Q8CHI8	Q8CHI8	1	1	1	E1A-binding protein p400	Ep400	sp|Q8CHI8|EP400_MOUSE E1A-binding protein p400 OS=Mus musculus OX=10090 GN=Ep400 PE=1 SV=3	1	1	1	1	0	0	1	0	0	0	0	0	0	0	0	0	1	0	0	0	0	0	0	0	0	0	1	0	0	0	0	0	0	0	0.6	0.6	0.6	337.18	3072	3072	2
Q8CI94;Q9WUB3;Q9ET01;E9PUM3;Q3UEJ6	Q8CI94	10;4;3;3;2	10;4;3;3;2	10;4;3;3;2	Glycogen phosphorylase, brain form	Pygb	sp|Q8CI94|PYGB_MOUSE Glycogen phosphorylase, brain form OS=Mus musculus OX=10090 GN=Pygb PE=1 SV=3	5	10	10	10	1	0	1	2	0	0	4	7	3	3	1	0	1	2	0	0	4	7	3	3	1	0	1	2	0	0	4	7	3	3	13.3	13.3	13.3	96.729	843	843;842;850;754;759	2
Q8CIM1	Q8CIM1	1	1	1	Leucine-rich repeat-containing protein 45	Lrrc45	sp|Q8CIM1|LRC45_MOUSE Leucine-rich repeat-containing protein 45 OS=Mus musculus OX=10090 GN=Lrrc45 PE=2 SV=2	1	1	1	1	0	0	0	0	0	1	0	0	0	0	0	0	0	0	0	1	0	0	0	0	0	0	0	0	0	1	0	0	0	0	1.6	1.6	1.6	76.383	670	670	2
Q8K0S0;E0CXJ1;Q8BGT8;F6U6Z2;F7D3N3	Q8K0S0;E0CXJ1	3;2;1;1;1	3;2;1;1;1	3;2;1;1;1	Phytanoyl-CoA hydroxylase-interacting protein	Phyhip	sp|Q8K0S0|PHYIP_MOUSE Phytanoyl-CoA hydroxylase-interacting protein OS=Mus musculus OX=10090 GN=Phyhip PE=1 SV=1;tr|E0CXJ1|E0CXJ1_MOUSE Phytanoyl-CoA hydroxylase-interacting protein (Fragment) OS=Mus musculus OX=10090 GN=Phyhip PE=1 SV=1	5	3	3	3	0	2	0	0	0	0	1	2	1	1	0	2	0	0	0	0	1	2	1	1	0	2	0	0	0	0	1	2	1	1	8.2	8.2	8.2	37.554	330	330;88;375;212;330	4
Q8K0T0	Q8K0T0	2	2	2	Reticulon-1	Rtn1	sp|Q8K0T0|RTN1_MOUSE Reticulon-1 OS=Mus musculus OX=10090 GN=Rtn1 PE=1 SV=1	1	2	2	2	0	0	0	0	0	0	1	1	0	0	0	0	0	0	0	0	1	1	0	0	0	0	0	0	0	0	1	1	0	0	2.7	2.7	2.7	83.571	780	780	1	2
Q8K0U4	Q8K0U4	4	4	4	Heat shock 70 kDa protein 12A	Hspa12a	sp|Q8K0U4|HS12A_MOUSE Heat shock 70 kDa protein 12A OS=Mus musculus OX=10090 GN=Hspa12a PE=1 SV=1	1	4	4	4	0	0	1	0	0	0	4	2	2	4	0	0	1	0	0	0	4	2	2	4	0	0	1	0	0	0	4	2	2	4	6.4	6.4	6.4	74.87	675	675	2
Q8K2B3	Q8K2B3	6	6	6	Succinate dehydrogenase [ubiquinone] flavoprotein subunit, mitochondrial	Sdha	sp|Q8K2B3|SDHA_MOUSE Succinate dehydrogenase [ubiquinone] flavoprotein subunit, mitochondrial OS=Mus musculus OX=10090 GN=Sdha PE=1 SV=1	1	6	6	6	0	0	2	0	0	0	3	2	1	4	0	0	2	0	0	0	3	2	1	4	0	0	2	0	0	0	3	2	1	4	10.1	10.1	10.1	72.585	664	664	2
Q8K2F8;A0A0U1RP90;A0A0U1RP30;A2BH69;F6X2V9	Q8K2F8;A0A0U1RP90	3;2;1;1;1	3;2;1;1;1	3;2;1;1;1	Protein LSM14 homolog A	Lsm14a	sp|Q8K2F8|LS14A_MOUSE Protein LSM14 homolog A OS=Mus musculus OX=10090 GN=Lsm14a PE=1 SV=1;tr|A0A0U1RP90|A0A0U1RP90_MOUSE Protein LSM14 homolog A (Fragment) OS=Mus musculus OX=10090 GN=Lsm14a PE=1 SV=1	5	3	3	3	0	2	0	0	0	0	0	1	0	2	0	2	0	0	0	0	0	1	0	2	0	2	0	0	0	0	0	1	0	2	5	5	5	50.545	462	462;158;124;175;287	3.33
Q8K596	Q8K596	12	12	12		Slc8a2	sp|Q8K596|NAC2_MOUSE Sodium/calcium exchanger 2 OS=Mus musculus OX=10090 GN=Slc8a2 PE=1 SV=1	1	12	12	12	0	0	4	0	0	0	12	10	0	4	0	0	4	0	0	0	12	10	0	4	0	0	4	0	0	0	12	10	0	4	16.6	16.6	16.6	100.71	921	921	1.51	25
Q8QZT1	Q8QZT1	10	10	10	Acetyl-CoA acetyltransferase, mitochondrial	Acat1	sp|Q8QZT1|THIL_MOUSE Acetyl-CoA acetyltransferase, mitochondrial OS=Mus musculus OX=10090 GN=Acat1 PE=1 SV=1	1	10	10	10	0	0	0	0	0	1	4	8	4	9	0	0	0	0	0	1	4	8	4	9	0	0	0	0	0	1	4	8	4	9	32.3	32.3	32.3	44.816	424	424	4
Q8R191	Q8R191	2	2	2	Synaptogyrin-3	Syngr3	sp|Q8R191|SNG3_MOUSE Synaptogyrin-3 OS=Mus musculus OX=10090 GN=Syngr3 PE=1 SV=1	1	2	2	2	0	1	1	0	0	0	2	1	1	1	0	1	1	0	0	0	2	1	1	1	0	1	1	0	0	0	2	1	1	1	8.3	8.3	8.3	24.561	229	229	5
Q8R4D5	Q8R4D5	1	1	1	Transient receptor potential cation channel subfamily M member 8	Trpm8	sp|Q8R4D5|TRPM8_MOUSE Transient receptor potential cation channel subfamily M member 8 OS=Mus musculus OX=10090 GN=Trpm8 PE=1 SV=3	1	1	1	1	0	0	0	1	1	1	0	0	1	1	0	0	0	1	1	1	0	0	1	1	0	0	0	1	1	1	0	0	1	1	0.7	0.7	0.7	127.71	1104	1104	4.8
Q8R574;Q9D0M1;B1AT82	Q8R574	9;1;1	9;1;1	9;1;1	Phosphoribosyl pyrophosphate synthase-associated protein 2	Prpsap2	sp|Q8R574|KPRB_MOUSE Phosphoribosyl pyrophosphate synthase-associated protein 2 OS=Mus musculus OX=10090 GN=Prpsap2 PE=1 SV=1	3	9	9	9	0	0	0	0	0	0	9	5	0	1	0	0	0	0	0	0	9	5	0	1	0	0	0	0	0	0	9	5	0	1	37.7	37.7	37.7	40.88	369	369;356;385	4.05
Q8R5L1;O35658	Q8R5L1;O35658	2;1	2;1	2;1	Complement component 1 Q subcomponent-binding protein, mitochondrial	C1qbp	tr|Q8R5L1|Q8R5L1_MOUSE Complement component 1 Q subcomponent-binding protein, mitochondrial OS=Mus musculus OX=10090 GN=C1qbp PE=1 SV=1;sp|O35658|C1QBP_MOUSE Complement component 1 Q subcomponent-binding protein, mitochondrial OS=Mus musculus OX=10090 GN=C	2	2	2	2	0	0	0	0	0	0	0	0	1	2	0	0	0	0	0	0	0	0	1	2	0	0	0	0	0	0	0	0	1	2	12.5	12.5	12.5	31.025	279	279;278	5
Q8VDN2	Q8VDN2	22	11	11	Sodium/potassium-transporting ATPase subunit alpha-1	Atp1a1	sp|Q8VDN2|AT1A1_MOUSE Sodium/potassium-transporting ATPase subunit alpha-1 OS=Mus musculus OX=10090 GN=Atp1a1 PE=1 SV=1	1	22	11	11	5	10	13	10	10	8	15	22	14	17	0	3	2	1	1	0	5	11	4	6	0	3	2	1	1	0	5	11	4	6	27.5	12.6	12.6	112.98	1023	1023	1.33	29
Q8VDP4	Q8VDP4	26	26	26	Cell cycle and apoptosis regulator protein 2	Ccar2	sp|Q8VDP4|CCAR2_MOUSE Cell cycle and apoptosis regulator protein 2 OS=Mus musculus OX=10090 GN=Ccar2 PE=1 SV=2	1	26	26	26	0	0	0	26	0	0	0	0	0	0	0	0	0	26	0	0	0	0	0	0	0	0	0	26	0	0	0	0	0	0	41.3	41.3	41.3	103	922	922	1.52	33
Q8VEH5	Q8VEH5	1	1	1	EPM2A-interacting protein 1	Epm2aip1	sp|Q8VEH5|EPMIP_MOUSE EPM2A-interacting protein 1 OS=Mus musculus OX=10090 GN=Epm2aip1 PE=1 SV=1	1	1	1	1	0	0	0	0	0	0	0	1	1	1	0	0	0	0	0	0	0	1	1	1	0	0	0	0	0	0	0	1	1	1	1.5	1.5	1.5	70.095	606	606	2.33
Q8VEK3	Q8VEK3	10	10	10	Heterogeneous nuclear ribonucleoprotein U	Hnrnpu	sp|Q8VEK3|HNRPU_MOUSE Heterogeneous nuclear ribonucleoprotein U OS=Mus musculus OX=10090 GN=Hnrnpu PE=1 SV=1	1	10	10	10	1	8	0	0	0	0	0	4	5	10	1	8	0	0	0	0	0	4	5	10	1	8	0	0	0	0	0	4	5	10	12.6	12.6	12.6	87.917	800	800	1.17	29
Q8VIJ6	Q8VIJ6	5	5	5	Splicing factor, proline- and glutamine-rich	Sfpq	sp|Q8VIJ6|SFPQ_MOUSE Splicing factor, proline- and glutamine-rich OS=Mus musculus OX=10090 GN=Sfpq PE=1 SV=1	1	5	5	5	1	5	0	0	0	0	3	3	1	3	1	5	0	0	0	0	3	3	1	3	1	5	0	0	0	0	3	3	1	3	8.3	8.3	8.3	75.441	699	699	1.94	1
Q91V14;A0A076FR46;Q924N4;Q9JIS8;A0A0J9YU26;A0A0J9YV84;F8WIJ0;Q6P6P5;Q3V0N8	Q91V14;A0A076FR46	17;16;1;1;1;1;1;1;1	17;16;1;1;1;1;1;1;1	17;16;1;1;1;1;1;1;1	Solute carrier family 12 member 5	Slc12a5	sp|Q91V14|S12A5_MOUSE Solute carrier family 12 member 5 OS=Mus musculus OX=10090 GN=Slc12a5 PE=1 SV=2;tr|A0A076FR46|A0A076FR46_MOUSE KCC2a-S25 variant 1 OS=Mus musculus OX=10090 GN=Slc12a5 PE=1 SV=1	9	17	17	17	1	2	13	6	1	0	12	13	9	11	1	2	13	6	1	0	12	13	9	11	1	2	13	6	1	0	12	13	9	11	19	19	19	126.27	1138	1138;1133;1150;1085;186;231;1087;1106;1128	1.08	76
Q91V35;P18052;A0A2R8VHH6	Q91V35;P18052	3;2;1	3;2;1	3;2;1	Receptor-type tyrosine-protein phosphatase;Receptor-type tyrosine-protein phosphatase alpha	Ptpra	tr|Q91V35|Q91V35_MOUSE Receptor-type tyrosine-protein phosphatase alpha OS=Mus musculus OX=10090 GN=Ptpra PE=1 SV=1;sp|P18052|PTPRA_MOUSE Receptor-type tyrosine-protein phosphatase alpha OS=Mus musculus OX=10090 GN=Ptpra PE=1 SV=3	3	3	3	3	0	0	2	0	0	0	1	1	0	0	0	0	2	0	0	0	1	1	0	0	0	0	2	0	0	0	1	1	0	0	4.3	4.3	4.3	89.841	793	793;829;374	1	4
Q91V61;Q3U4F0;A0A494BB84	Q91V61;Q3U4F0;A0A494BB84	6;5;4	6;5;4	6;5;4	Sideroflexin-3	Sfxn3	sp|Q91V61|SFXN3_MOUSE Sideroflexin-3 OS=Mus musculus OX=10090 GN=Sfxn3 PE=1 SV=1;tr|Q3U4F0|Q3U4F0_MOUSE Sideroflexin-3 OS=Mus musculus OX=10090 GN=Sfxn3 PE=1 SV=1;tr|A0A494BB84|A0A494BB84_MOUSE Sideroflexin-3 (Fragment) OS=Mus musculus OX=10090 GN=Sfxn3 PE	3	6	6	6	0	1	3	3	2	0	0	5	0	1	0	1	3	3	2	0	0	5	0	1	0	1	3	3	2	0	0	5	0	1	23.7	23.7	23.7	35.406	321	321;281;110	4
Q91VA7;A0A668KL51;V9GXV0	Q91VA7;A0A668KL51	13;11;5	13;11;5	13;11;5	Isocitrate dehydrogenase [NAD] subunit, mitochondrial	Idh3b	tr|Q91VA7|Q91VA7_MOUSE Isocitrate dehydrogenase [NAD] subunit, mitochondrial OS=Mus musculus OX=10090 GN=Idh3b PE=1 SV=1;tr|A0A668KL51|A0A668KL51_MOUSE Isocitrate dehydrogenase [NAD] subunit, mitochondrial OS=Mus musculus OX=10090 GN=Idh3b PE=1 SV=1	3	13	13	13	1	0	5	0	0	0	9	9	4	8	1	0	5	0	0	0	9	9	4	8	1	0	5	0	0	0	9	9	4	8	42.4	42.4	42.4	42.194	384	384;380;80	3.96
Q91VB8;P01942	Q91VB8;P01942	4;3	4;3	4;3	Hemoglobin subunit alpha	haemaglobin alpha 2;Hba	tr|Q91VB8|Q91VB8_MOUSE Alpha globin 1 OS=Mus musculus OX=10090 GN=Hba-a1 PE=1 SV=1;sp|P01942|HBA_MOUSE Hemoglobin subunit alpha OS=Mus musculus OX=10090 GN=Hba PE=1 SV=2	2	4	4	4	1	0	0	0	1	0	2	4	1	1	1	0	0	0	1	0	2	4	1	1	1	0	0	0	1	0	2	4	1	1	45.8	45.8	45.8	15.112	142	142;142	4.7
Q91VD9;A0A087WQ77	Q91VD9	7;1	7;1	7;1	NADH-ubiquinone oxidoreductase 75 kDa subunit, mitochondrial	Ndufs1	sp|Q91VD9|NDUS1_MOUSE NADH-ubiquinone oxidoreductase 75 kDa subunit, mitochondrial OS=Mus musculus OX=10090 GN=Ndufs1 PE=1 SV=2	2	7	7	7	0	1	0	0	0	0	1	7	2	3	0	1	0	0	0	0	1	7	2	3	0	1	0	0	0	0	1	7	2	3	13.9	13.9	13.9	79.776	727	727;62	2
Q91VR5;A0A1Y7VM48	Q91VR5	5;2	5;2	5;2	ATP-dependent RNA helicase DDX1	Ddx1	sp|Q91VR5|DDX1_MOUSE ATP-dependent RNA helicase DDX1 OS=Mus musculus OX=10090 GN=Ddx1 PE=1 SV=1	2	5	5	5	0	1	0	0	0	0	3	1	5	5	0	1	0	0	0	0	3	1	5	5	0	1	0	0	0	0	3	1	5	5	10.5	10.5	10.5	82.499	740	740;190	2
Q91WS0	Q91WS0	2	2	2	CDGSH iron-sulfur domain-containing protein 1	Cisd1	sp|Q91WS0|CISD1_MOUSE CDGSH iron-sulfur domain-containing protein 1 OS=Mus musculus OX=10090 GN=Cisd1 PE=1 SV=1	1	2	2	2	0	1	0	0	0	0	1	2	0	0	0	1	0	0	0	0	1	2	0	0	0	1	0	0	0	0	1	2	0	0	22.2	22.2	22.2	12.097	108	108	5
Q91XV3	Q91XV3	2	2	2	Brain acid soluble protein 1	Basp1	sp|Q91XV3|BASP1_MOUSE Brain acid soluble protein 1 OS=Mus musculus OX=10090 GN=Basp1 PE=1 SV=3	1	2	2	2	2	1	0	0	0	0	0	2	0	1	2	1	0	0	0	0	0	2	0	1	2	1	0	0	0	0	0	2	0	1	16.4	16.4	16.4	22.086	226	226	3
Q91ZP9	Q91ZP9	3	3	3	N-terminal EF-hand calcium-binding protein 2	Necab2	sp|Q91ZP9|NECA2_MOUSE N-terminal EF-hand calcium-binding protein 2 OS=Mus musculus OX=10090 GN=Necab2 PE=1 SV=1	1	3	3	3	0	0	1	0	0	0	0	0	2	3	0	0	1	0	0	0	0	0	2	3	0	0	1	0	0	0	0	0	2	3	11.6	11.6	11.6	43.44	389	389	4
Q91ZZ3	Q91ZZ3	4	3	3	Beta-synuclein	Sncb	sp|Q91ZZ3|SYUB_MOUSE Beta-synuclein OS=Mus musculus OX=10090 GN=Sncb PE=1 SV=1	1	4	3	3	3	4	0	0	0	0	3	2	1	4	3	3	0	0	0	0	2	2	1	3	3	3	0	0	0	0	2	2	1	3	37.6	30.8	30.8	14.051	133	133	4.4	2
Q922F4	Q922F4	11	1	1	Tubulin beta-6 chain	Tubb6	sp|Q922F4|TBB6_MOUSE Tubulin beta-6 chain OS=Mus musculus OX=10090 GN=Tubb6 PE=1 SV=1	1	11	1	1	5	7	5	7	2	1	9	9	7	9	0	1	0	1	1	0	0	0	1	0	0	1	0	1	1	0	0	0	1	0	27.1	3.8	3.8	50.09	447	447	2.86	1
Q922Q8	Q922Q8	3	3	3	Leucine-rich repeat-containing protein 59	Lrrc59	sp|Q922Q8|LRC59_MOUSE Leucine-rich repeat-containing protein 59 OS=Mus musculus OX=10090 GN=Lrrc59 PE=1 SV=1	1	3	3	3	0	0	0	0	0	0	1	3	0	0	0	0	0	0	0	0	1	3	0	0	0	0	0	0	0	0	1	3	0	0	11.4	11.4	11.4	34.877	307	307	4.25
Q99JR1	Q99JR1	2	2	2	Sideroflexin-1	Sfxn1	sp|Q99JR1|SFXN1_MOUSE Sideroflexin-1 OS=Mus musculus OX=10090 GN=Sfxn1 PE=1 SV=3	1	2	2	2	0	0	0	0	0	0	0	2	0	0	0	0	0	0	0	0	0	2	0	0	0	0	0	0	0	0	0	2	0	0	6.5	6.5	6.5	35.649	322	322	4
Q99JY8	Q99JY8	3	3	3	Lipid phosphate phosphohydrolase 3	Ppap2b	sp|Q99JY8|PLPP3_MOUSE Phospholipid phosphatase 3 OS=Mus musculus OX=10090 GN=Plpp3 PE=1 SV=1	1	3	3	3	0	0	3	0	0	2	0	1	0	0	0	0	3	0	0	2	0	1	0	0	0	0	3	0	0	2	0	1	0	0	12.2	12.2	12.2	35.216	312	312	4.67
Q99KI0;A0A2R8VJW0;A0A2R8VHM8;A0A2R8W744	Q99KI0	16;2;1;1	16;2;1;1	16;2;1;1	Aconitate hydratase, mitochondrial	Aco2	sp|Q99KI0|ACON_MOUSE Aconitate hydratase, mitochondrial OS=Mus musculus OX=10090 GN=Aco2 PE=1 SV=1	4	16	16	16	5	2	3	1	2	2	8	11	9	10	5	2	3	1	2	2	8	11	9	10	5	2	3	1	2	2	8	11	9	10	25.4	25.4	25.4	85.462	780	780;62;58;194	1.98	1
Q99LC3;A0A087WR38	Q99LC3	6;1	6;1	6;1	NADH dehydrogenase [ubiquinone] 1 alpha subcomplex subunit 10, mitochondrial	Ndufa10	sp|Q99LC3|NDUAA_MOUSE NADH dehydrogenase [ubiquinone] 1 alpha subcomplex subunit 10, mitochondrial OS=Mus musculus OX=10090 GN=Ndufa10 PE=1 SV=1	2	6	6	6	0	0	0	0	0	0	0	6	2	2	0	0	0	0	0	0	0	6	2	2	0	0	0	0	0	0	0	6	2	2	25.6	25.6	25.6	40.603	355	355;89	4
Q9CPN9	Q9CPN9	1	1	1		2210010C04Rik	tr|Q9CPN9|Q9CPN9_MOUSE RIKEN cDNA 2210010C04 gene OS=Mus musculus OX=10090 GN=2210010C04Rik PE=1 SV=1	1	1	1	1	1	1	1	0	1	0	1	1	1	1	1	1	1	0	1	0	1	1	1	1	1	1	1	0	1	0	1	1	1	1	4.9	4.9	4.9	26.422	247	247	3.04	5
Q9CQQ7;A0A0G2JGX3	Q9CQQ7;A0A0G2JGX3	4;3	4;3	4;3	ATP synthase F(0) complex subunit B1, mitochondrial	Atp5f1	sp|Q9CQQ7|AT5F1_MOUSE ATP synthase F(0) complex subunit B1, mitochondrial OS=Mus musculus OX=10090 GN=Atp5pb PE=1 SV=1;tr|A0A0G2JGX3|A0A0G2JGX3_MOUSE ATP synthase F(0) complex subunit B1, mitochondrial (Fragment) OS=Mus musculus OX=10090 GN=Atp5pb PE=1 SV=	2	4	4	4	1	0	1	0	0	0	3	3	1	2	1	0	1	0	0	0	3	3	1	2	1	0	1	0	0	0	3	3	1	2	19.1	19.1	19.1	28.948	256	256;122	5
Q9CQR4	Q9CQR4	5	5	5	Acyl-coenzyme A thioesterase 13;Acyl-coenzyme A thioesterase 13, N-terminally processed	Acot13	sp|Q9CQR4|ACO13_MOUSE Acyl-coenzyme A thioesterase 13 OS=Mus musculus OX=10090 GN=Acot13 PE=1 SV=1	1	5	5	5	2	4	2	1	1	2	1	4	2	3	2	4	2	1	1	2	1	4	2	3	2	4	2	1	1	2	1	4	2	3	43.6	43.6	43.6	15.183	140	140	4.46	4
Q9CQZ5;A0A2R8W6V1	Q9CQZ5;A0A2R8W6V1	2;1	2;1	2;1	NADH dehydrogenase [ubiquinone] 1 alpha subcomplex subunit 6	Ndufa6	sp|Q9CQZ5|NDUA6_MOUSE NADH dehydrogenase [ubiquinone] 1 alpha subcomplex subunit 6 OS=Mus musculus OX=10090 GN=Ndufa6 PE=1 SV=1;tr|A0A2R8W6V1|A0A2R8W6V1_MOUSE NADH dehydrogenase [ubiquinone] 1 alpha subcomplex subunit 6 OS=Mus musculus OX=10090 GN=Ndufa6 P	2	2	2	2	0	1	0	0	0	0	0	2	1	0	0	1	0	0	0	0	0	2	1	0	0	1	0	0	0	0	0	2	1	0	14.5	14.5	14.5	15.283	131	131;41	5
Q9CR62;Q5SX46;Q5SX48	Q9CR62;Q5SX46	8;5;2	8;5;2	8;5;2	Mitochondrial 2-oxoglutarate/malate carrier protein	Slc25a11	sp|Q9CR62|M2OM_MOUSE Mitochondrial 2-oxoglutarate/malate carrier protein OS=Mus musculus OX=10090 GN=Slc25a11 PE=1 SV=3;tr|Q5SX46|Q5SX46_MOUSE Mitochondrial 2-oxoglutarate/malate carrier protein (Fragment) OS=Mus musculus OX=10090 GN=Slc25a11 PE=1 SV=1	3	8	8	8	0	1	2	0	0	0	6	8	3	1	0	1	2	0	0	0	6	8	3	1	0	1	2	0	0	0	6	8	3	1	32.2	32.2	32.2	34.155	314	314;193;76	5
Q9CRY7	Q9CRY7	1	1	1	Glycerophosphodiester phosphodiesterase domain-containing protein 1	Gdpd1	sp|Q9CRY7|GDPD1_MOUSE Lysophospholipase D GDPD1 OS=Mus musculus OX=10090 GN=Gdpd1 PE=1 SV=1	1	1	1	1	0	0	0	0	0	0	0	1	0	0	0	0	0	0	0	0	0	1	0	0	0	0	0	0	0	0	0	1	0	0	5.1	5.1	5.1	35.866	314	314	4
Q9CZN4;E9QN38	Q9CZN4;E9QN38	2;1	2;1	2;1	Protein shisa-9	Shisa9	sp|Q9CZN4|SHSA9_MOUSE Protein shisa-9 OS=Mus musculus OX=10090 GN=Shisa9 PE=1 SV=2;tr|E9QN38|E9QN38_MOUSE Protein shisa-9 OS=Mus musculus OX=10090 GN=Shisa9 PE=1 SV=1	2	2	2	2	0	0	0	1	0	0	1	0	0	0	0	0	0	1	0	0	1	0	0	0	0	0	0	1	0	0	1	0	0	0	7.1	7.1	7.1	46.842	424	424;408	3
Q9CZT8	Q9CZT8	1	1	1	Ras-related protein Rab-3B	Rab3b	sp|Q9CZT8|RAB3B_MOUSE Ras-related protein Rab-3B OS=Mus musculus OX=10090 GN=Rab3b PE=1 SV=1	1	1	1	1	0	0	0	1	0	0	1	1	0	0	0	0	0	1	0	0	1	1	0	0	0	0	0	1	0	0	1	1	0	0	7.3	7.3	7.3	24.757	219	219	5
Q9CZU6;Q80X68	Q9CZU6;Q80X68	4;2	4;2	4;2	Citrate synthase, mitochondrial;Citrate synthase	Cs;Csl	sp|Q9CZU6|CISY_MOUSE Citrate synthase, mitochondrial OS=Mus musculus OX=10090 GN=Cs PE=1 SV=1;tr|Q80X68|Q80X68_MOUSE Citrate synthase OS=Mus musculus OX=10090 GN=Csl PE=1 SV=1	2	4	4	4	0	0	0	0	0	0	1	3	1	0	0	0	0	0	0	0	1	3	1	0	0	0	0	0	0	0	1	3	1	0	8.8	8.8	8.8	51.736	464	464;466	4
Q9CZW5	Q9CZW5	4	4	4	Mitochondrial import receptor subunit TOM70	Tomm70a	sp|Q9CZW5|TOM70_MOUSE Mitochondrial import receptor subunit TOM70 OS=Mus musculus OX=10090 GN=Tomm70 PE=1 SV=2	1	4	4	4	0	0	0	0	0	0	2	3	0	2	0	0	0	0	0	0	2	3	0	2	0	0	0	0	0	0	2	3	0	2	6.7	6.7	6.7	67.589	611	611	2
Q9D051	Q9D051	9	9	9	Pyruvate dehydrogenase E1 component subunit beta, mitochondrial	Pdhb	sp|Q9D051|ODPB_MOUSE Pyruvate dehydrogenase E1 component subunit beta, mitochondrial OS=Mus musculus OX=10090 GN=Pdhb PE=1 SV=1	1	9	9	9	1	3	6	4	1	0	4	7	5	5	1	3	6	4	1	0	4	7	5	5	1	3	6	4	1	0	4	7	5	5	31.5	31.5	31.5	38.937	359	359	4.07
Q9D2G2	Q9D2G2	6	6	6	Dihydrolipoyllysine-residue succinyltransferase component of 2-oxoglutarate dehydrogenase complex, mitochondrial	Dlst	sp|Q9D2G2|ODO2_MOUSE Dihydrolipoyllysine-residue succinyltransferase component of 2-oxoglutarate dehydrogenase complex, mitochondrial OS=Mus musculus OX=10090 GN=Dlst PE=1 SV=1	1	6	6	6	5	5	3	0	0	0	5	3	5	6	5	5	3	0	0	0	5	3	5	6	5	5	3	0	0	0	5	3	5	6	15	15	15	48.994	454	454	3.02
Q9D6F9	Q9D6F9	17	4	4	Tubulin beta-4A chain	Tubb4a	sp|Q9D6F9|TBB4A_MOUSE Tubulin beta-4A chain OS=Mus musculus OX=10090 GN=Tubb4a PE=1 SV=3	1	17	4	4	10	9	9	11	2	1	12	13	11	15	2	0	1	2	0	0	2	3	1	4	2	0	1	2	0	0	2	3	1	4	54.3	14.2	14.2	49.585	444	444	2.88	1
Q9D6J6	Q9D6J6	1	1	1	NADH dehydrogenase [ubiquinone] flavoprotein 2, mitochondrial	Ndufv2	sp|Q9D6J6|NDUV2_MOUSE NADH dehydrogenase [ubiquinone] flavoprotein 2, mitochondrial OS=Mus musculus OX=10090 GN=Ndufv2 PE=1 SV=2	1	1	1	1	0	0	0	0	0	0	0	1	0	0	0	0	0	0	0	0	0	1	0	0	0	0	0	0	0	0	0	1	0	0	4	4	4	27.285	248	248	5
Q9D6M3;E9PV90;E9PY45;E9Q6M6;V9GWS2;Q80X52;E9Q579;A0A0J9YUX4;A0A0J9YTY6;A0A0J9YUJ4;A0A0J9YVJ3	Q9D6M3;E9PV90;E9PY45;E9Q6M6;V9GWS2;Q80X52;E9Q579	5;4;4;4;3;3;3;2;2;1;1	5;4;4;4;3;3;3;2;2;1;1	3;2;2;3;2;2;2;1;1;1;1	Mitochondrial glutamate carrier 1	Slc25a22	sp|Q9D6M3|GHC1_MOUSE Mitochondrial glutamate carrier 1 OS=Mus musculus OX=10090 GN=Slc25a22 PE=1 SV=1;tr|E9PV90|E9PV90_MOUSE Mitochondrial glutamate carrier 1 (Fragment) OS=Mus musculus OX=10090 GN=Slc25a22 PE=1 SV=1;tr|E9PY45|E9PY45_MOUSE Mitochondrial gl	11	5	5	3	1	0	3	3	0	1	3	5	3	2	1	0	3	3	0	1	3	5	3	2	1	0	1	1	0	1	2	3	2	1	14.6	14.6	8	34.67	323	323;206;222;229;63;98;103;85;196;72;99	4.32	2
Q9D6Z6	Q9D6Z6	1	1	1	Interleukin-36 beta	Il36b	sp|Q9D6Z6|IL36B_MOUSE Interleukin-36 beta OS=Mus musculus OX=10090 GN=Il36b PE=2 SV=1	1	1	1	1	1	0	0	0	0	0	0	0	0	0	1	0	0	0	0	0	0	0	0	0	1	0	0	0	0	0	0	0	0	0	8.7	8.7	8.7	20.878	183	183	5
Q9D7A8	Q9D7A8	3	3	3	Armadillo repeat-containing protein 1	Armc1	sp|Q9D7A8|ARMC1_MOUSE Armadillo repeat-containing protein 1 OS=Mus musculus OX=10090 GN=Armc1 PE=1 SV=1	1	3	3	3	0	0	3	0	0	0	0	0	0	0	0	0	3	0	0	0	0	0	0	0	0	0	3	0	0	0	0	0	0	0	15.6	15.6	15.6	31.246	282	282	4
Q9D853	Q9D853	1	1	1	Protein-lysine N-methyltransferase Mettl10	Mettl10	sp|Q9D853|EFMT2_MOUSE EEF1A lysine methyltransferase 2 OS=Mus musculus OX=10090 GN=Eef1akmt2 PE=1 SV=1	1	1	1	1	0	0	1	0	0	0	0	0	0	0	0	0	1	0	0	0	0	0	0	0	0	0	1	0	0	0	0	0	0	0	3.7	3.7	3.7	26.864	244	244	3
Q9D880	Q9D880	3	3	3	Mitochondrial import inner membrane translocase subunit TIM50	Timm50	sp|Q9D880|TIM50_MOUSE Mitochondrial import inner membrane translocase subunit TIM50 OS=Mus musculus OX=10090 GN=Timm50 PE=1 SV=1	1	3	3	3	0	0	0	0	0	0	3	3	1	1	0	0	0	0	0	0	3	3	1	1	0	0	0	0	0	0	3	3	1	1	10.8	10.8	10.8	39.776	353	353	4
Q9DB05	Q9DB05	3	1	1	Alpha-soluble NSF attachment protein	Napa	sp|Q9DB05|SNAA_MOUSE Alpha-soluble NSF attachment protein OS=Mus musculus OX=10090 GN=Napa PE=1 SV=1	1	3	1	1	0	0	0	0	0	0	0	3	0	1	0	0	0	0	0	0	0	1	0	0	0	0	0	0	0	0	0	1	0	0	16.6	5.1	5.1	33.189	295	295	4
Q9DB20;F7D3P8;A0A338P7G3;A0A338P776;F6XVM5	Q9DB20;F7D3P8	6;4;2;2;1	6;4;2;2;1	6;4;2;2;1	ATP synthase subunit O, mitochondrial	Atp5o	sp|Q9DB20|ATPO_MOUSE ATP synthase subunit O, mitochondrial OS=Mus musculus OX=10090 GN=Atp5po PE=1 SV=1;tr|F7D3P8|F7D3P8_MOUSE ATP synthase subunit O, mitochondrial (Fragment) OS=Mus musculus OX=10090 GN=Atp5o PE=1 SV=8	5	6	6	6	3	3	2	2	0	0	6	6	4	4	3	3	2	2	0	0	6	6	4	4	3	3	2	2	0	0	6	6	4	4	34.3	34.3	34.3	23.363	213	213;176;94;109;71	4.97
Q9DB72	Q9DB72	7	7	7	BTB/POZ domain-containing protein 17	Btbd17	sp|Q9DB72|BTBDH_MOUSE BTB/POZ domain-containing protein 17 OS=Mus musculus OX=10090 GN=Btbd17 PE=1 SV=1	1	7	7	7	0	2	0	0	0	0	0	2	4	5	0	2	0	0	0	0	0	2	4	5	0	2	0	0	0	0	0	2	4	5	24.1	24.1	24.1	52.602	478	478	2.92
Q9DB77;A0A140LI98	Q9DB77	12;3	12;3	12;3	Cytochrome b-c1 complex subunit 2, mitochondrial	Uqcrc2	sp|Q9DB77|QCR2_MOUSE Cytochrome b-c1 complex subunit 2, mitochondrial OS=Mus musculus OX=10090 GN=Uqcrc2 PE=1 SV=1	2	12	12	12	0	1	0	0	0	1	3	12	2	4	0	1	0	0	0	1	3	12	2	4	0	1	0	0	0	1	3	12	2	4	35.1	35.1	35.1	48.234	453	453;145	4
Q9DC51	Q9DC51	3	1	1	Guanine nucleotide-binding protein G(k) subunit alpha	Gnai3	sp|Q9DC51|GNAI3_MOUSE Guanine nucleotide-binding protein G(i) subunit alpha-3 OS=Mus musculus OX=10090 GN=Gnai3 PE=1 SV=3	1	3	1	1	1	0	2	1	1	1	2	3	2	2	0	0	0	0	0	0	0	1	0	0	0	0	0	0	0	0	0	1	0	0	10.7	4.2	4.2	40.538	354	354	4
Q9DCJ5	Q9DCJ5	2	2	2	NADH dehydrogenase [ubiquinone] 1 alpha subcomplex subunit 8	Ndufa8	sp|Q9DCJ5|NDUA8_MOUSE NADH dehydrogenase [ubiquinone] 1 alpha subcomplex subunit 8 OS=Mus musculus OX=10090 GN=Ndufa8 PE=1 SV=3	1	2	2	2	0	1	0	0	0	0	1	2	1	0	0	1	0	0	0	0	1	2	1	0	0	1	0	0	0	0	1	2	1	0	8.7	8.7	8.7	19.992	172	172	5
Q9DCT2	Q9DCT2	3	3	3	NADH dehydrogenase [ubiquinone] iron-sulfur protein 3, mitochondrial	Ndufs3	sp|Q9DCT2|NDUS3_MOUSE NADH dehydrogenase [ubiquinone] iron-sulfur protein 3, mitochondrial OS=Mus musculus OX=10090 GN=Ndufs3 PE=1 SV=2	1	3	3	3	0	0	0	0	0	0	0	3	0	0	0	0	0	0	0	0	0	3	0	0	0	0	0	0	0	0	0	3	0	0	14.1	14.1	14.1	30.149	263	263	5
Q9EPN1;Q9ESE1;E9Q3Y4;A0A5F8MPY6;A0A0A6YXX3;A0A0A6YXL6;A0A1D5RM41;Q8BSM6	Q9EPN1	60;6;6;6;6;6;5;1	60;6;6;6;6;6;5;1	60;6;6;6;6;6;5;1	Neurobeachin	Nbea	sp|Q9EPN1|NBEA_MOUSE Neurobeachin OS=Mus musculus OX=10090 GN=Nbea PE=1 SV=1	8	60	60	60	0	1	60	0	0	0	0	0	1	1	0	1	60	0	0	0	0	0	1	1	0	1	60	0	0	0	0	0	1	1	26.6	26.6	26.6	326.74	2936	2936;2856;2854;575;2577;2790;2124;758	1.15	68
Q9EQH3	Q9EQH3	3	3	3	Vacuolar protein sorting-associated protein 35	Vps35	sp|Q9EQH3|VPS35_MOUSE Vacuolar protein sorting-associated protein 35 OS=Mus musculus OX=10090 GN=Vps35 PE=1 SV=1	1	3	3	3	0	0	0	0	0	0	2	2	0	0	0	0	0	0	0	0	2	2	0	0	0	0	0	0	0	0	2	2	0	0	3.6	3.6	3.6	91.712	796	796	2
Q9ER00	Q9ER00	2	2	2	Syntaxin-12	Stx12	sp|Q9ER00|STX12_MOUSE Syntaxin-12 OS=Mus musculus OX=10090 GN=Stx12 PE=1 SV=1	1	2	2	2	0	0	0	0	0	0	0	2	0	0	0	0	0	0	0	0	0	2	0	0	0	0	0	0	0	0	0	2	0	0	10.6	10.6	10.6	31.195	274	274	4
Q9ERD7	Q9ERD7	14	4	2	Tubulin beta-3 chain	Tubb3	sp|Q9ERD7|TBB3_MOUSE Tubulin beta-3 chain OS=Mus musculus OX=10090 GN=Tubb3 PE=1 SV=1	1	14	4	2	8	9	6	9	1	1	12	13	8	13	1	1	0	0	0	0	3	4	0	4	1	1	0	0	0	0	1	2	0	2	38	14.4	9.3	50.418	450	450	3.12
Q9ES97	Q9ES97	1	1	1	Reticulon-3	Rtn3	sp|Q9ES97|RTN3_MOUSE Reticulon-3 OS=Mus musculus OX=10090 GN=Rtn3 PE=1 SV=2	1	1	1	1	0	0	0	0	0	0	1	1	0	1	0	0	0	0	0	0	1	1	0	1	0	0	0	0	0	0	1	1	0	1	1.1	1.1	1.1	103.88	964	964	5
Q9JHU4	Q9JHU4	5	5	5	Cytoplasmic dynein 1 heavy chain 1	Dync1h1	sp|Q9JHU4|DYHC1_MOUSE Cytoplasmic dynein 1 heavy chain 1 OS=Mus musculus OX=10090 GN=Dync1h1 PE=1 SV=2	1	5	5	5	0	0	0	1	0	0	3	4	1	1	0	0	0	1	0	0	3	4	1	1	0	0	0	1	0	0	3	4	1	1	1.2	1.2	1.2	532.04	4644	4644	1.1	9
Q9JIK9	Q9JIK9	2	2	2	28S ribosomal protein S34, mitochondrial	Mrps34	sp|Q9JIK9|RT34_MOUSE 28S ribosomal protein S34, mitochondrial OS=Mus musculus OX=10090 GN=Mrps34 PE=1 SV=1	1	2	2	2	0	0	0	0	0	0	0	0	0	2	0	0	0	0	0	0	0	0	0	2	0	0	0	0	0	0	0	0	0	2	6.9	6.9	6.9	25.826	218	218	5
Q9JIS5	Q9JIS5	3	3	3	Synaptic vesicle glycoprotein 2A	Sv2a	sp|Q9JIS5|SV2A_MOUSE Synaptic vesicle glycoprotein 2A OS=Mus musculus OX=10090 GN=Sv2a PE=1 SV=1	1	3	3	3	0	1	0	1	1	0	3	2	1	2	0	1	0	1	1	0	3	2	1	2	0	1	0	1	1	0	3	2	1	2	4.7	4.7	4.7	82.646	742	742	1.64	5
Q9JJV4	Q9JJV4	1	1	1	Voltage-dependent calcium channel gamma-4 subunit	Cacng4	sp|Q9JJV4|CCG4_MOUSE Voltage-dependent calcium channel gamma-4 subunit OS=Mus musculus OX=10090 GN=Cacng4 PE=1 SV=1	1	1	1	1	0	0	0	0	0	0	0	1	0	0	0	0	0	0	0	0	0	1	0	0	0	0	0	0	0	0	0	1	0	0	5.2	5.2	5.2	36.534	327	327	4
Q9JJV5;S4R247	Q9JJV5	7;3	7;3	5;1	Voltage-dependent calcium channel gamma-3 subunit	Cacng3	sp|Q9JJV5|CCG3_MOUSE Voltage-dependent calcium channel gamma-3 subunit OS=Mus musculus OX=10090 GN=Cacng3 PE=1 SV=2	2	7	7	5	0	0	1	0	0	0	3	4	5	7	0	0	1	0	0	0	3	4	5	7	0	0	0	0	0	0	1	2	4	5	25.4	25.4	21.3	35.515	315	315;127	3.2	8
Q9JJY3	Q9JJY3	1	1	1	Sphingomyelin phosphodiesterase 3	Smpd3	sp|Q9JJY3|NSMA2_MOUSE Sphingomyelin phosphodiesterase 3 OS=Mus musculus OX=10090 GN=Smpd3 PE=1 SV=1	1	1	1	1	0	0	1	0	0	0	0	0	0	0	0	0	1	0	0	0	0	0	0	0	0	0	1	0	0	0	0	0	0	0	3.4	3.4	3.4	71.196	655	655	2
Q9JKR6;A0A1L1SQ34;E0CYZ2;F6TRP3	Q9JKR6;A0A1L1SQ34;E0CYZ2;F6TRP3	2;1;1;1	2;1;1;1	2;1;1;1	Hypoxia up-regulated protein 1	Hyou1	sp|Q9JKR6|HYOU1_MOUSE Hypoxia up-regulated protein 1 OS=Mus musculus OX=10090 GN=Hyou1 PE=1 SV=1;tr|A0A1L1SQ34|A0A1L1SQ34_MOUSE Hypoxia up-regulated protein 1 (Fragment) OS=Mus musculus OX=10090 GN=Hyou1 PE=1 SV=1;tr|E0CYZ2|E0CYZ2_MOUSE Hypoxia up-regulate	4	2	2	2	0	0	0	0	0	0	1	0	1	2	0	0	0	0	0	0	1	0	1	2	0	0	0	0	0	0	1	0	1	2	1.6	1.6	1.6	111.18	999	999;153;172;227	1	4
Q9JM63	Q9JM63	2	2	2	ATP-sensitive inward rectifier potassium channel 10	Kcnj10	sp|Q9JM63|KCJ10_MOUSE ATP-sensitive inward rectifier potassium channel 10 OS=Mus musculus OX=10090 GN=Kcnj10 PE=1 SV=1	1	2	2	2	0	0	0	0	0	0	0	0	2	2	0	0	0	0	0	0	0	0	2	2	0	0	0	0	0	0	0	0	2	2	8.7	8.7	8.7	42.432	379	379	4
Q9R0T7;Q9QUK9	Q9R0T7;Q9QUK9	1;1	1;1	1;1		Try4;Try5	tr|Q9R0T7|Q9R0T7_MOUSE Pancreatic trypsin OS=Mus musculus OX=10090 GN=Try4 PE=1 SV=1;tr|Q9QUK9|Q9QUK9_MOUSE TESP4 OS=Mus musculus OX=10090 GN=Try5 PE=1 SV=1	2	1	1	1	1	1	0	0	1	0	1	0	0	1	1	1	0	0	1	0	1	0	0	1	1	1	0	0	1	0	1	0	0	1	8.1	8.1	8.1	26.274	246	246;246	3.4	1
Q9QXX4	Q9QXX4	4	1	1	Calcium-binding mitochondrial carrier protein Aralar2	Slc25a13	sp|Q9QXX4|CMC2_MOUSE Calcium-binding mitochondrial carrier protein Aralar2 OS=Mus musculus OX=10090 GN=Slc25a13 PE=1 SV=1	1	4	1	1	0	1	0	2	2	0	2	4	2	2	0	1	0	0	0	0	1	1	1	1	0	1	0	0	0	0	1	1	1	1	6.2	1.9	1.9	74.466	676	676	2
Q9QYE6;A0A1Y7VMD3	Q9QYE6;A0A1Y7VMD3	2;1	2;1	2;1	Golgin subfamily A member 5	Golga5	sp|Q9QYE6|GOGA5_MOUSE Golgin subfamily A member 5 OS=Mus musculus OX=10090 GN=Golga5 PE=1 SV=2;tr|A0A1Y7VMD3|A0A1Y7VMD3_MOUSE Golgin subfamily A member 5 (Fragment) OS=Mus musculus OX=10090 GN=Golga5 PE=1 SV=1	2	2	2	2	0	0	0	0	0	0	0	0	1	2	0	0	0	0	0	0	0	0	1	2	0	0	0	0	0	0	0	0	1	2	2.9	2.9	2.9	82.367	729	729;234	2
Q9QZF2	Q9QZF2	2	2	2	Glypican-1;Secreted glypican-1	Gpc1	sp|Q9QZF2|GPC1_MOUSE Glypican-1 OS=Mus musculus OX=10090 GN=Gpc1 PE=1 SV=1	1	2	2	2	0	0	2	0	0	0	0	0	0	0	0	0	2	0	0	0	0	0	0	0	0	0	2	0	0	0	0	0	0	0	6.1	6.1	6.1	61.359	557	557	1	2
Q9R0P9	Q9R0P9	1	1	1	Ubiquitin carboxyl-terminal hydrolase isozyme L1	Uchl1	sp|Q9R0P9|UCHL1_MOUSE Ubiquitin carboxyl-terminal hydrolase isozyme L1 OS=Mus musculus OX=10090 GN=Uchl1 PE=1 SV=1	1	1	1	1	0	0	0	1	0	0	0	0	0	0	0	0	0	1	0	0	0	0	0	0	0	0	0	1	0	0	0	0	0	0	8.1	8.1	8.1	24.838	223	223	5
Q9R0Q6	Q9R0Q6	1	1	1	Actin-related protein 2/3 complex subunit 1A	Arpc1a	sp|Q9R0Q6|ARC1A_MOUSE Actin-related protein 2/3 complex subunit 1A OS=Mus musculus OX=10090 GN=Arpc1a PE=1 SV=1	1	1	1	1	0	0	0	0	1	0	0	1	1	1	0	0	0	0	1	0	0	1	1	1	0	0	0	0	1	0	0	1	1	1	2.7	2.7	2.7	41.626	370	370	4
Q9R0X4;Q32MW3	Q9R0X4;Q32MW3	11;6	11;6	11;6	Acyl-coenzyme A thioesterase 9, mitochondrial;Acyl-coenzyme A thioesterase 10, mitochondrial	Acot9;Acot10	sp|Q9R0X4|ACOT9_MOUSE Acyl-coenzyme A thioesterase 9, mitochondrial OS=Mus musculus OX=10090 GN=Acot9 PE=1 SV=1;sp|Q32MW3|ACO10_MOUSE Acyl-coenzyme A thioesterase 10, mitochondrial OS=Mus musculus OX=10090 GN=Acot10 PE=2 SV=1	2	11	11	11	6	10	0	0	0	0	2	5	2	4	6	10	0	0	0	0	2	5	2	4	6	10	0	0	0	0	2	5	2	4	30.1	30.1	30.1	50.56	439	439;439	3.19
Q9R111	Q9R111	1	1	1	Guanine deaminase	Gda	sp|Q9R111|GUAD_MOUSE Guanine deaminase OS=Mus musculus OX=10090 GN=Gda PE=1 SV=1	1	1	1	1	0	0	0	0	0	0	0	1	0	0	0	0	0	0	0	0	0	1	0	0	0	0	0	0	0	0	0	1	0	0	2	2	2	51.012	454	454	3
Q9R1V7	Q9R1V7	1	1	1	Disintegrin and metalloproteinase domain-containing protein 23	Adam23	sp|Q9R1V7|ADA23_MOUSE Disintegrin and metalloproteinase domain-containing protein 23 OS=Mus musculus OX=10090 GN=Adam23 PE=1 SV=1	1	1	1	1	0	0	0	0	0	0	1	0	0	1	0	0	0	0	0	0	1	0	0	1	0	0	0	0	0	0	1	0	0	1	1.3	1.3	1.3	91.547	829	829	2
Q9WUM5	Q9WUM5	4	4	4	Succinyl-CoA ligase [ADP/GDP-forming] subunit alpha, mitochondrial	Suclg1	sp|Q9WUM5|SUCA_MOUSE Succinate--CoA ligase [ADP/GDP-forming] subunit alpha, mitochondrial OS=Mus musculus OX=10090 GN=Suclg1 PE=1 SV=4	1	4	4	4	3	0	1	1	1	0	1	1	3	3	3	0	1	1	1	0	1	1	3	3	3	0	1	1	1	0	1	1	3	3	14.2	14.2	14.2	36.154	346	346	4
Q9WV34	Q9WV34	1	1	1	MAGUK p55 subfamily member 2	Mpp2	sp|Q9WV34|MPP2_MOUSE MAGUK p55 subfamily member 2 OS=Mus musculus OX=10090 GN=Mpp2 PE=1 SV=1	1	1	1	1	0	0	0	0	0	0	1	0	0	0	0	0	0	0	0	0	1	0	0	0	0	0	0	0	0	0	1	0	0	0	2.2	2.2	2.2	61.554	552	552	3
Q9WV55;A0A3B2W837	Q9WV55;A0A3B2W837	2;1	2;1	1;1	Vesicle-associated membrane protein-associated protein A	Vapa	sp|Q9WV55|VAPA_MOUSE Vesicle-associated membrane protein-associated protein A OS=Mus musculus OX=10090 GN=Vapa PE=1 SV=2;tr|A0A3B2W837|A0A3B2W837_MOUSE Vesicle-associated membrane protein-associated protein A (Fragment) OS=Mus musculus OX=10090 GN=Vapa PE=	2	2	2	1	0	0	0	1	0	0	0	0	1	0	0	0	0	1	0	0	0	0	1	0	0	0	0	1	0	0	0	0	0	0	11.2	11.2	6.4	27.855	249	249;236	5
Q9Z0E0	Q9Z0E0	7	7	7	Neurochondrin	Ncdn	sp|Q9Z0E0|NCDN_MOUSE Neurochondrin OS=Mus musculus OX=10090 GN=Ncdn PE=1 SV=1	1	7	7	7	0	0	4	0	0	0	4	4	1	2	0	0	4	0	0	0	4	4	1	2	0	0	4	0	0	0	4	4	1	2	12.8	12.8	12.8	78.894	729	729	2
Q9Z0V2	Q9Z0V2	3	3	3	Potassium voltage-gated channel subfamily D member 2	Kcnd2	sp|Q9Z0V2|KCND2_MOUSE Potassium voltage-gated channel subfamily D member 2 OS=Mus musculus OX=10090 GN=Kcnd2 PE=1 SV=1	1	3	3	3	0	0	1	0	0	0	2	2	1	0	0	0	1	0	0	0	2	2	1	0	0	0	1	0	0	0	2	2	1	0	6.7	6.7	6.7	70.576	630	630	1.43	4
Q9Z1G3;A0A2I3BPD0	Q9Z1G3;A0A2I3BPD0	2;1	2;1	2;1	V-type proton ATPase subunit C 1	Atp6v1c1	sp|Q9Z1G3|VATC1_MOUSE V-type proton ATPase subunit C 1 OS=Mus musculus OX=10090 GN=Atp6v1c1 PE=1 SV=4;tr|A0A2I3BPD0|A0A2I3BPD0_MOUSE V-type proton ATPase subunit C OS=Mus musculus OX=10090 GN=Atp6v1c1 PE=1 SV=1	2	2	2	2	0	0	0	0	0	0	0	2	0	0	0	0	0	0	0	0	0	2	0	0	0	0	0	0	0	0	0	2	0	0	4.5	4.5	4.5	43.887	382	382;101	4
Q9Z1R9	Q9Z1R9	1	1	1		Prss1	tr|Q9Z1R9|Q9Z1R9_MOUSE Protease, serine 1 (trypsin 1) OS=Mus musculus OX=10090 GN=Prss1 PE=1 SV=1	1	1	1	1	0	0	0	0	0	0	1	0	0	0	0	0	0	0	0	0	1	0	0	0	0	0	0	0	0	0	1	0	0	0	8.1	8.1	8.1	26.134	246	246	1	1
Q9Z1T2	Q9Z1T2	4	4	4	Thrombospondin-4	Thbs4	sp|Q9Z1T2|TSP4_MOUSE Thrombospondin-4 OS=Mus musculus OX=10090 GN=Thbs4 PE=1 SV=1	1	4	4	4	0	0	4	0	0	0	0	0	0	0	0	0	4	0	0	0	0	0	0	0	0	0	4	0	0	0	0	0	0	0	5.3	5.3	5.3	106.37	963	963	1	4
Q9Z2I9	Q9Z2I9	5	5	5	Succinyl-CoA ligase [ADP-forming] subunit beta, mitochondrial	Sucla2	sp|Q9Z2I9|SUCB1_MOUSE Succinate--CoA ligase [ADP-forming] subunit beta, mitochondrial OS=Mus musculus OX=10090 GN=Sucla2 PE=1 SV=2	1	5	5	5	1	1	2	0	0	0	5	5	0	1	1	1	2	0	0	0	5	5	0	1	1	1	2	0	0	0	5	5	0	1	13.2	13.2	13.2	50.113	463	463	3.93
Q9Z2W9	Q9Z2W9	26	21	2	Glutamate receptor 3	Gria3	sp|Q9Z2W9|GRIA3_MOUSE Glutamate receptor 3 OS=Mus musculus OX=10090 GN=Gria3 PE=1 SV=2	1	26	21	2	0	1	9	8	1	0	23	24	19	21	0	0	7	4	0	0	19	19	15	18	0	0	0	0	0	0	2	2	2	2	38.4	30.7	1.2	100.53	888	888	2.11	31
REV__A0A0J9YUF0;REV__O35425	REV__A0A0J9YUF0;REV__O35425	1;1	1;1	1;1			tr|A0A0J9YUF0|A0A0J9YUF0_MOUSE Bcl-2-related ovarian killer protein (Fragment) OS=Mus musculus OX=10090 GN=Bok PE=3 SV=1;sp|O35425|BOK_MOUSE Bcl-2-related ovarian killer protein OS=Mus musculus OX=10090 GN=Bok PE=1 SV=1	2	1	1	1	1	0	0	0	0	0	0	1	0	0	1	0	0	0	0	0	0	1	0	0	1	0	0	0	0	0	0	1	0	0	0	0	0	14.181	132	132;213	2.5	1
REV__A0A0U1RQ65;REV__Q3UHK8	REV__A0A0U1RQ65;REV__Q3UHK8	1;1	1;1	1;1			tr|A0A0U1RQ65|A0A0U1RQ65_MOUSE Trinucleotide repeat-containing gene 6A protein (Fragment) OS=Mus musculus OX=10090 GN=Tnrc6a PE=1 SV=1;sp|Q3UHK8|TNR6A_MOUSE Trinucleotide repeat-containing gene 6A protein OS=Mus musculus OX=10090 GN=Tnrc6a PE=1 SV=2	2	1	1	1	0	0	0	1	1	0	0	0	0	0	0	0	0	1	1	0	0	0	0	0	0	0	0	1	1	0	0	0	0	0	0	0	0	150.29	1398	1398;1896	5
REV__A0A2C9F2D9	REV__A0A2C9F2D9	1	1	1			tr|A0A2C9F2D9|A0A2C9F2D9_MOUSE CASP8 and FADD-like apoptosis regulator OS=Mus musculus OX=10090 GN=Cflar PE=3 SV=1	1	1	1	1	0	1	0	0	0	0	0	1	1	1	0	1	0	0	0	0	0	1	1	1	0	1	0	0	0	0	0	1	1	1	0	0	0	55.155	484	484	5
REV__A0A338P703;REV__A0A338P7G1;REV__A0A338P7H5;REV__P29699	REV__A0A338P703;REV__A0A338P7G1;REV__A0A338P7H5;REV__P29699	1;1;1;1	1;1;1;1	1;1;1;1			tr|A0A338P703|A0A338P703_MOUSE Alpha-2-HS-glycoprotein OS=Mus musculus OX=10090 GN=Ahsg PE=1 SV=1;tr|A0A338P7G1|A0A338P7G1_MOUSE Alpha-2-HS-glycoprotein OS=Mus musculus OX=10090 GN=Ahsg PE=1 SV=1;tr|A0A338P7H5|A0A338P7H5_MOUSE Alpha-2-HS-glycoprotein OS=Mu	4	1	1	1	0	0	0	0	0	0	1	0	1	0	0	0	0	0	0	0	1	0	1	0	0	0	0	0	0	0	1	0	1	0	0	0	0	28.463	266	266;294;301;345	3
REV__B0QZW5;REV__B0QZW4	REV__B0QZW5;REV__B0QZW4	1;1	1;1	1;1			tr|B0QZW5|B0QZW5_MOUSE SPT3, SAGA and STAGA complex component (Fragment) OS=Mus musculus OX=10090 GN=Supt3 PE=1 SV=1;tr|B0QZW4|B0QZW4_MOUSE SPT3, SAGA and STAGA complex component (Fragment) OS=Mus musculus OX=10090 GN=Supt3 PE=1 SV=1	2	1	1	1	0	0	0	0	0	0	0	0	1	0	0	0	0	0	0	0	0	0	1	0	0	0	0	0	0	0	0	0	1	0	0	0	0	42.702	382	382;406	4
REV__P11881	REV__P11881	1	1	1			sp|P11881|ITPR1_MOUSE Inositol 1,4,5-trisphosphate receptor type 1 OS=Mus musculus OX=10090 GN=Itpr1 PE=1 SV=2	1	1	1	1	0	0	1	0	0	1	0	0	0	0	0	0	1	0	0	1	0	0	0	0	0	0	1	0	0	1	0	0	0	0	0	0	0	313.16	2749	2749	2.7	3
REV__Q0VF22	REV__Q0VF22	1	1	1			sp|Q0VF22|CC138_MOUSE Coiled-coil domain-containing protein 138 OS=Mus musculus OX=10090 GN=Ccdc138 PE=1 SV=1	1	1	1	1	1	1	0	0	0	0	0	0	1	1	1	1	0	0	0	0	0	0	1	1	1	1	0	0	0	0	0	0	1	1	0	0	0	77.947	680	680	2	2
REV__Q3TXS7	REV__Q3TXS7	1	1	1			sp|Q3TXS7|PSMD1_MOUSE 26S proteasome non-ATPase regulatory subunit 1 OS=Mus musculus OX=10090 GN=Psmd1 PE=1 SV=1	1	1	1	1	1	0	0	0	0	0	0	0	0	0	1	0	0	0	0	0	0	0	0	0	1	0	0	0	0	0	0	0	0	0	0	0	0	105.73	953	953	2
REV__Q3UR70	REV__Q3UR70	1	1	1			sp|Q3UR70|TGFA1_MOUSE Transforming growth factor-beta receptor-associated protein 1 OS=Mus musculus OX=10090 GN=Tgfbrap1 PE=1 SV=1	1	1	1	1	0	0	0	1	0	0	0	0	0	0	0	0	0	1	0	0	0	0	0	0	0	0	0	1	0	0	0	0	0	0	0	0	0	97.302	860	860	2
REV__Q5F226	REV__Q5F226	1	1	1			sp|Q5F226|FAT2_MOUSE Protocadherin Fat 2 OS=Mus musculus OX=10090 GN=Fat2 PE=1 SV=1	1	1	1	1	0	0	1	0	1	0	0	0	0	0	0	0	1	0	1	0	0	0	0	0	0	0	1	0	1	0	0	0	0	0	0	0	0	480.1	4351	4351	2	2
REV__Q8K0S5	REV__Q8K0S5	1	1	1			sp|Q8K0S5|R4RL1_MOUSE Reticulon-4 receptor-like 1 OS=Mus musculus OX=10090 GN=Rtn4rl1 PE=1 SV=1	1	1	1	1	0	0	0	0	0	0	0	1	0	0	0	0	0	0	0	0	0	1	0	0	0	0	0	0	0	0	0	1	0	0	0	0	0	49.836	445	445	5
REV__Q8VG87	REV__Q8VG87	1	1	1			tr|Q8VG87|Q8VG87_MOUSE Olfactory receptor OS=Mus musculus OX=10090 GN=Olfr273 PE=2 SV=1	1	1	1	1	0	0	1	0	0	1	0	0	1	1	0	0	1	0	0	1	0	0	1	1	0	0	1	0	0	1	0	0	1	1	0	0	0	35.475	317	317	3.38	1
S4R1J9;S4R2T7;S4R2F3	S4R1J9;S4R2T7;S4R2F3	1;1;1	1;1;1	1;1;1		Ank2	tr|S4R1J9|S4R1J9_MOUSE Ankyrin-2 (Fragment) OS=Mus musculus OX=10090 GN=Ank2 PE=1 SV=1;tr|S4R2T7|S4R2T7_MOUSE Ankyrin-2 (Fragment) OS=Mus musculus OX=10090 GN=Ank2 PE=1 SV=2;tr|S4R2F3|S4R2F3_MOUSE Ankyrin-2 OS=Mus musculus OX=10090 GN=Ank2 PE=1 SV=3	3	1	1	1	0	0	0	0	0	0	0	1	1	1	0	0	0	0	0	0	0	1	1	1	0	0	0	0	0	0	0	1	1	1	1.4	1.4	1.4	120.01	1114	1114;1219;3926	1	3
[truncated: 63 more columns]

## Sheet: Table S4
Table S4. Raw iBAQ values of TARP-γ8 and SynDIG4 immunopurifications performed on hippocampus crude synaptosomes with associated peptide block and emty bead controls.
Protein	Fasta headers	iBAQ SynDIG4_1	iBAQ SynDIG4_2	iBAQ SynDIG4_PB_1	iBAQ SynDIG4_PB_2	iBAQ TARP2/4/8_1	iBAQ TARP2/4/8_2	iBAQ TARP2/8_1	iBAQ TARP2/8_2	iBAQ EB_1	iBAQ EB_2	MEAN_SynDIG4	MEAN_TARP2/4/8	MEAN_TARP2/8	MEAN_LOG10_SynDIG4	MEAN_LOG10_TARP2/4/8	MEAN_LOG10_TARP2/8
GluA1	tr|Q7TNB5|Q7TNB5_MOUSE Glutamate receptor OS=Mus musculus OX=10090 GN=Gria1 PE=1 SV=1	139280	172510	NAN	NAN	987100	1136700	376360	495940	NAN	1694.8	155895	1061900	436150	5.19283	6.02608	5.63964
GluA2	sp|P23819|GRIA2_MOUSE Glutamate receptor 2 OS=Mus musculus OX=10090 GN=Gria2 PE=1 SV=3	255190	138440	NAN	NAN	32339	876930	349190	484590	NAN	NAN	196815	454634	416890	5.29406	5.65766	5.62002
GluA3	sp|Q9Z2W9|GRIA3_MOUSE Glutamate receptor 3 OS=Mus musculus OX=10090 GN=Gria3 PE=1 SV=2	NAN	NAN	NAN	NAN	276250	396520	340770	351320	NAN	NAN	NAN	336385	346045	NAN	5.52684	5.53913
TARP-γ2	sp|O88602|CCG2_MOUSE Voltage-dependent calcium channel gamma-2 subunit OS=Mus musculus OX=10090 GN=Cacng2 PE=1 SV=1	31733	36005	NAN	NAN	3230200	6429300	1718400	2585400	NAN	5964.9	33869	4829750	2151900	4.5298	6.68392	6.33282
TARP-γ3	sp|Q9JJV5|CCG3_MOUSE Voltage-dependent calcium channel gamma-3 subunit OS=Mus musculus OX=10090 GN=Cacng3 PE=1 SV=2	NAN	NAN	NAN	NAN	26315	22526	633870	1206400	NAN	NAN	NAN	24420.5	920135	NAN	4.38775	5.96385
TARP-γ4	sp|Q9JJV4|CCG4_MOUSE Voltage-dependent calcium channel gamma-4 subunit OS=Mus musculus OX=10090 GN=Cacng4 PE=1 SV=1	NAN	NAN	NAN	NAN	NAN	36496	NAN	NAN	NAN	NAN	NAN	36496	NAN	NAN	4.56225	NAN
TARP-γ8	sp|Q8VHW2|CCG8_MOUSE Voltage-dependent calcium channel gamma-8 subunit OS=Mus musculus OX=10090 GN=Cacng8 PE=1 SV=1;tr|F7CZ64|F7CZ64_MOUSE Voltage-dependent calcium channel gamma-8 subunit OS=Mus musculus OX=10090 GN=Cacng8 PE=1 SV=2	173890	NAN	NAN	NAN	128200000	152640000	5962700	9271000	48128	234980	173890	140420000	7616850	5.24027	8.14743	6.88178
CNIH-2	tr|A0A494B9S6|A0A494B9S6_MOUSE Protein cornichon homolog 2 OS=Mus musculus OX=10090 GN=Cnih2 PE=1 SV=1;sp|O35089|CNIH2_MOUSE Protein cornichon homolog 2 OS=Mus musculus OX=10090 GN=Cnih2 PE=1 SV=2	NAN	NAN	NAN	NAN	1890300	1821100	1549400	779200	NAN	NAN	NAN	1855700	1164300	NAN	6.26851	6.06606
CNIH-3	tr|G3XA11|G3XA11_MOUSE Protein cornichon homolog 3 OS=Mus musculus OX=10090 GN=Cnih3 PE=1 SV=1;tr|Q9D6E1|Q9D6E1_MOUSE Protein cornichon homolog 3 OS=Mus musculus OX=10090 GN=Cnih3 PE=1 SV=1;tr|A0A1B0GSP1|A0A1B0GSP1_MOUSE Protein cornichon homolog 3 OS=Mus	238690	NAN	NAN	NAN	573370	651630	312900	NAN	NAN	NAN	238690	612500	312900	5.37783	5.78711	5.49541
SAP79	tr|D3Z3B8|D3Z3B8_MOUSE Disks large homolog 1 OS=Mus musculus OX=10090 GN=Dlg1 PE=1 SV=1;sp|Q811D0|DLG1_MOUSE Disks large homolog 1 OS=Mus musculus OX=10090 GN=Dlg1 PE=1 SV=1;tr|H7BWY4|H7BWY4_MOUSE Disks large homolog 1 OS=Mus musculus OX=10090 GN=Dlg1 PE=1	NAN	NAN	NAN	NAN	8803.7	45624	NAN	NAN	NAN	NAN	NAN	27213.8	NAN	NAN	4.43479	NAN
SAP102	sp|P70175|DLG3_MOUSE Disks large homolog 3 OS=Mus musculus OX=10090 GN=Dlg3 PE=1 SV=1;tr|A2BEF2|A2BEF2_MOUSE Disks large homolog 3 OS=Mus musculus OX=10090 GN=Dlg3 PE=1 SV=1;tr|Q52KF7|Q52KF7_MOUSE Disks large homolog 3 OS=Mus musculus OX=10090 GN=Dlg3 PE=1	NAN	NAN	NAN	NAN	1693.4	12626	NAN	NAN	NAN	NAN	NAN	7159.7	NAN	NAN	3.85489	NAN
PSD-95	sp|Q62108|DLG4_MOUSE Disks large homolog 4 OS=Mus musculus OX=10090 GN=Dlg4 PE=1 SV=1;tr|A0A338P6E5|A0A338P6E5_MOUSE Disks large homolog 4 OS=Mus musculus OX=10090 GN=Dlg4 PE=1 SV=1;tr|A0A338P6I6|A0A338P6I6_MOUSE Disks large homolog 4 OS=Mus musculus OX=10	NAN	NAN	NAN	NAN	88170	203560	NAN	17093	NAN	NAN	NAN	145865	17093	NAN	5.16395	4.23282
FRRS1L	sp|B1AXV0|FRS1L_MOUSE DOMON domain-containing protein FRRS1L OS=Mus musculus OX=10090 GN=Frrs1l PE=1 SV=1	NAN	NAN	NAN	NAN	16008	114750	NAN	NAN	NAN	NAN	NAN	65379	NAN	NAN	4.81544	NAN
MPP2	sp|Q9WV34|MPP2_MOUSE MAGUK p55 subfamily member 2 OS=Mus musculus OX=10090 GN=Mpp2 PE=1 SV=1	NAN	NAN	NAN	NAN	6382.1	NAN	NAN	NAN	NAN	NAN	NAN	6382.1	NAN	NAN	3.80496	NAN
Noelin1	tr|A3KGE4|A3KGE4_MOUSE Noelin OS=Mus musculus OX=10090 GN=Olfm1 PE=1 SV=1;tr|G3X9Q7|G3X9Q7_MOUSE Noelin OS=Mus musculus OX=10090 GN=Olfm1 PE=1 SV=1;tr|Q8R357|Q8R357_MOUSE Noelin OS=Mus musculus OX=10090 GN=Olfm1 PE=1 SV=1;sp|O88998|NOE1_MOUSE Noelin OS=Mus	NAN	NAN	NAN	NAN	7969.5	210850	10621	203510	NAN	4079.7	NAN	109410	107066	NAN	5.03906	5.02965
Noelin2	tr|A0A1L1SV46|A0A1L1SV46_MOUSE Noelin-2 OS=Mus musculus OX=10090 GN=Olfm2 PE=1 SV=1;tr|A0A1L1SQX6|A0A1L1SQX6_MOUSE Noelin-2 OS=Mus musculus OX=10090 GN=Olfm2 PE=1 SV=1;sp|Q8BM13|NOE2_MOUSE Noelin-2 OS=Mus musculus OX=10090 GN=Olfm2 PE=1 SV=2	NAN	NAN	3916.7	NAN	NAN	14707	NAN	11489	NAN	NAN	NAN	14707	11489	NAN	4.16752	4.06028
SynDIG4	sp|O35449|PRRT1_MOUSE Proline-rich transmembrane protein 1 OS=Mus musculus OX=10090 GN=Prrt1 PE=1 SV=1	39960000	23258000	402130	143150	2221400	2093600	342980	605470	NAN	22833	31609000	2157500	474225	7.49981	6.33395	5.67598
Rap-2b	sp|P61226|RAP2B_MOUSE Ras-related protein Rap-2b OS=Mus musculus OX=10090 GN=Rap2b PE=1 SV=1	61236	NAN	NAN	NAN	60585	60845	34194	NAN	NAN	NAN	61236	60715	34194	4.78701	4.7833	4.53395
Shisa6	tr|F6VQZ6|F6VQZ6_MOUSE Protein shisa-6 (Fragment) OS=Mus musculus OX=10090 GN=Shisa6 PE=1 SV=1;sp|Q3UH99|SHSA6_MOUSE Protein shisa-6 OS=Mus musculus OX=10090 GN=Shisa6 PE=1 SV=1	NAN	NAN	NAN	NAN	109640	82298	38975	52307	NAN	NAN	NAN	95969	45641	NAN	4.98213	4.65936
